# Supplementary material for: The imaginary eruption – volcanic activity through kids' eyes
Source: Copernicus journal article supplement (doi:10.5194/gc-5-205-2022), 2022-07-15
Supplement: Supplementary file 1 [file gc-5-205-2022-supplement.pdf]

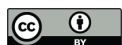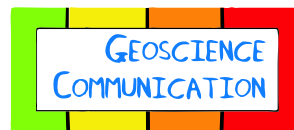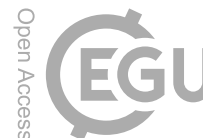

*Supplement of*

## **The imaginary eruption – volcanic activity through kids’ eyes**

**Micol Todesco et al.**

*Correspondence to:* Micol Todesco ([micol.todesco@ingv.it](mailto:micol.todesco@ingv.it))

The copyright of individual parts of the supplement might differ from the article licence.

## **Supplement 1 - Whole stories**

Selected examples of the stories collected during the workshop Eruzione Immaginaria organized by the Edurisk project. Each story is composed by 4 frames: the story's settings; volcanic unrest; the eruption; and the epilogue.

Drawings were realized by the pupils of primary and secondary schools listed in Table 1. The schools' enrolment into the project was discussed by schools' board and then presented to the families at the beginning of the school year, as a part of the school curriculum (Piano Triennale di Offerta Formativa). We did not collect any personal information about the participating students who always worked in pairs or small groups. Students were explicitly asked not to print their full names on their compositions. The production of text and drawings was not compulsory and students were free to decide the degree of their involvement in the exercise. The stories we collected were freely donated to be used for research purposes such as the present manuscript. Originals are kept into the Edurisk archives.

The supplement is provided as a portfolio, with examples of the collected materials.

**Supplement 1a.** Example story (frames 1-4) from Anonymous Student 1.



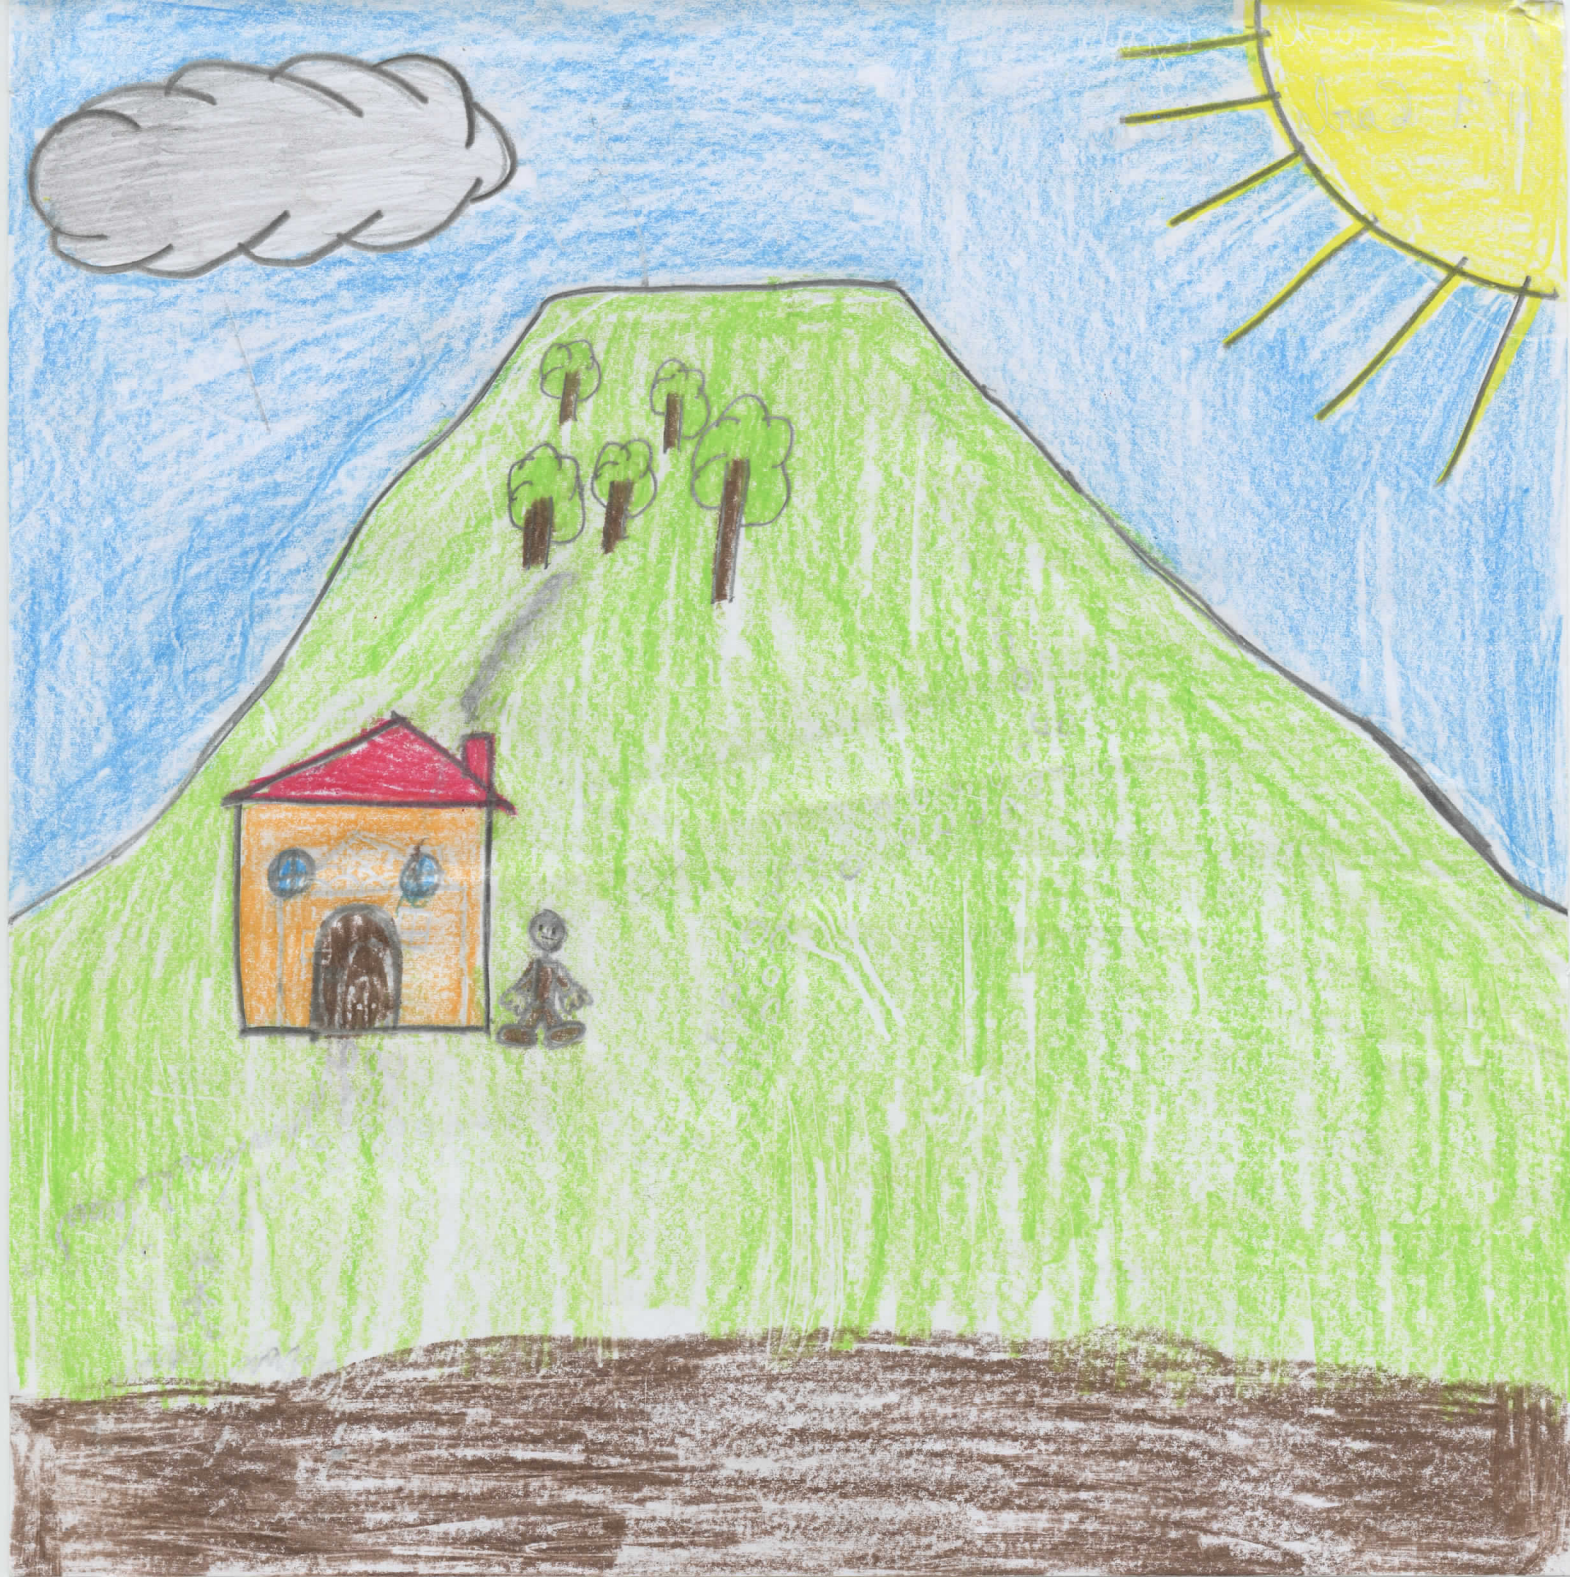

C'era una volta un mugnaio che visse vicino ad un vulcano.



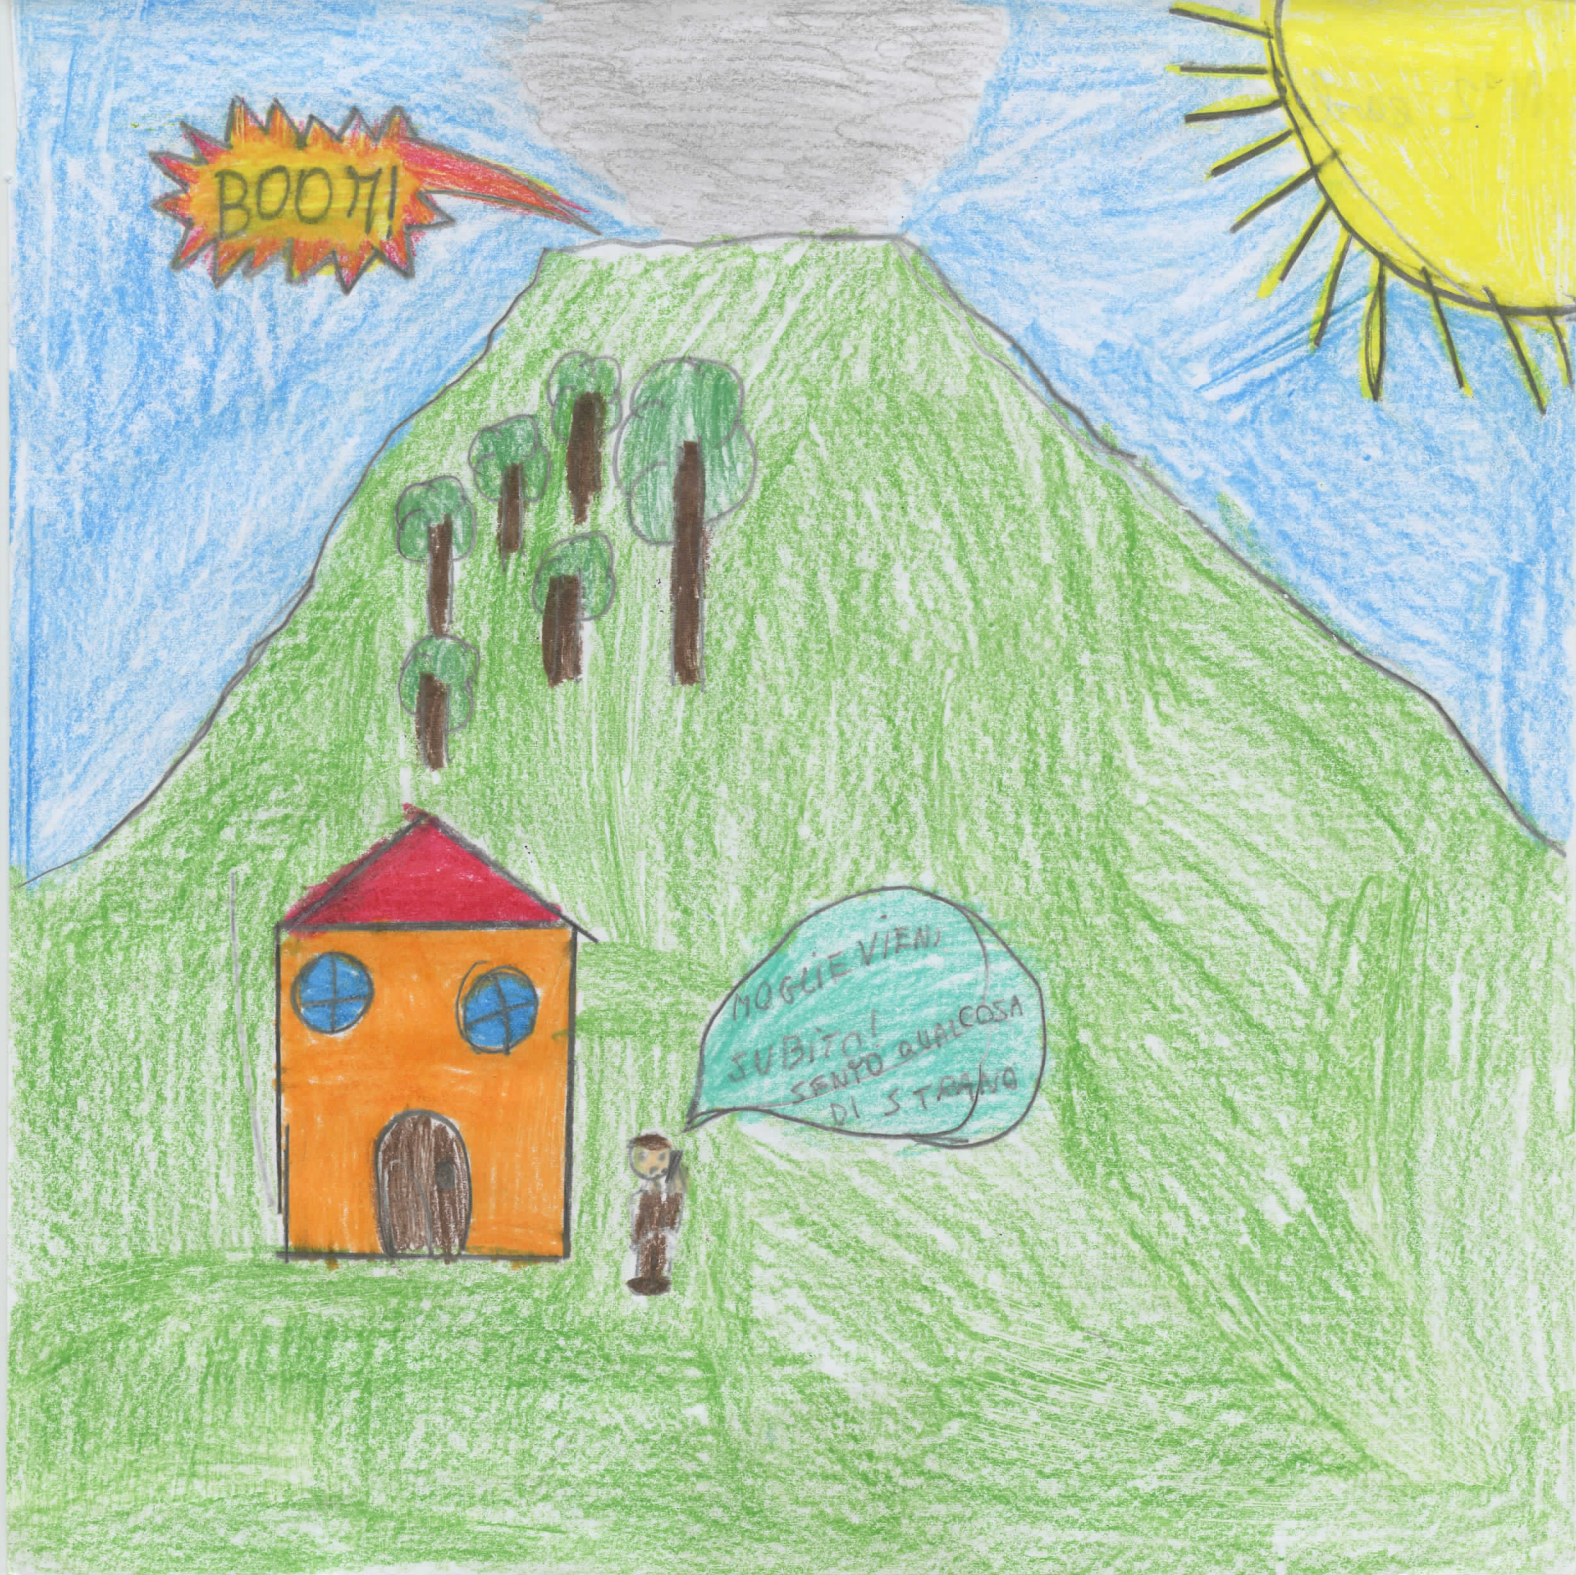

Il mugnaio sente qualcosa di strano e chiama sua moglie.







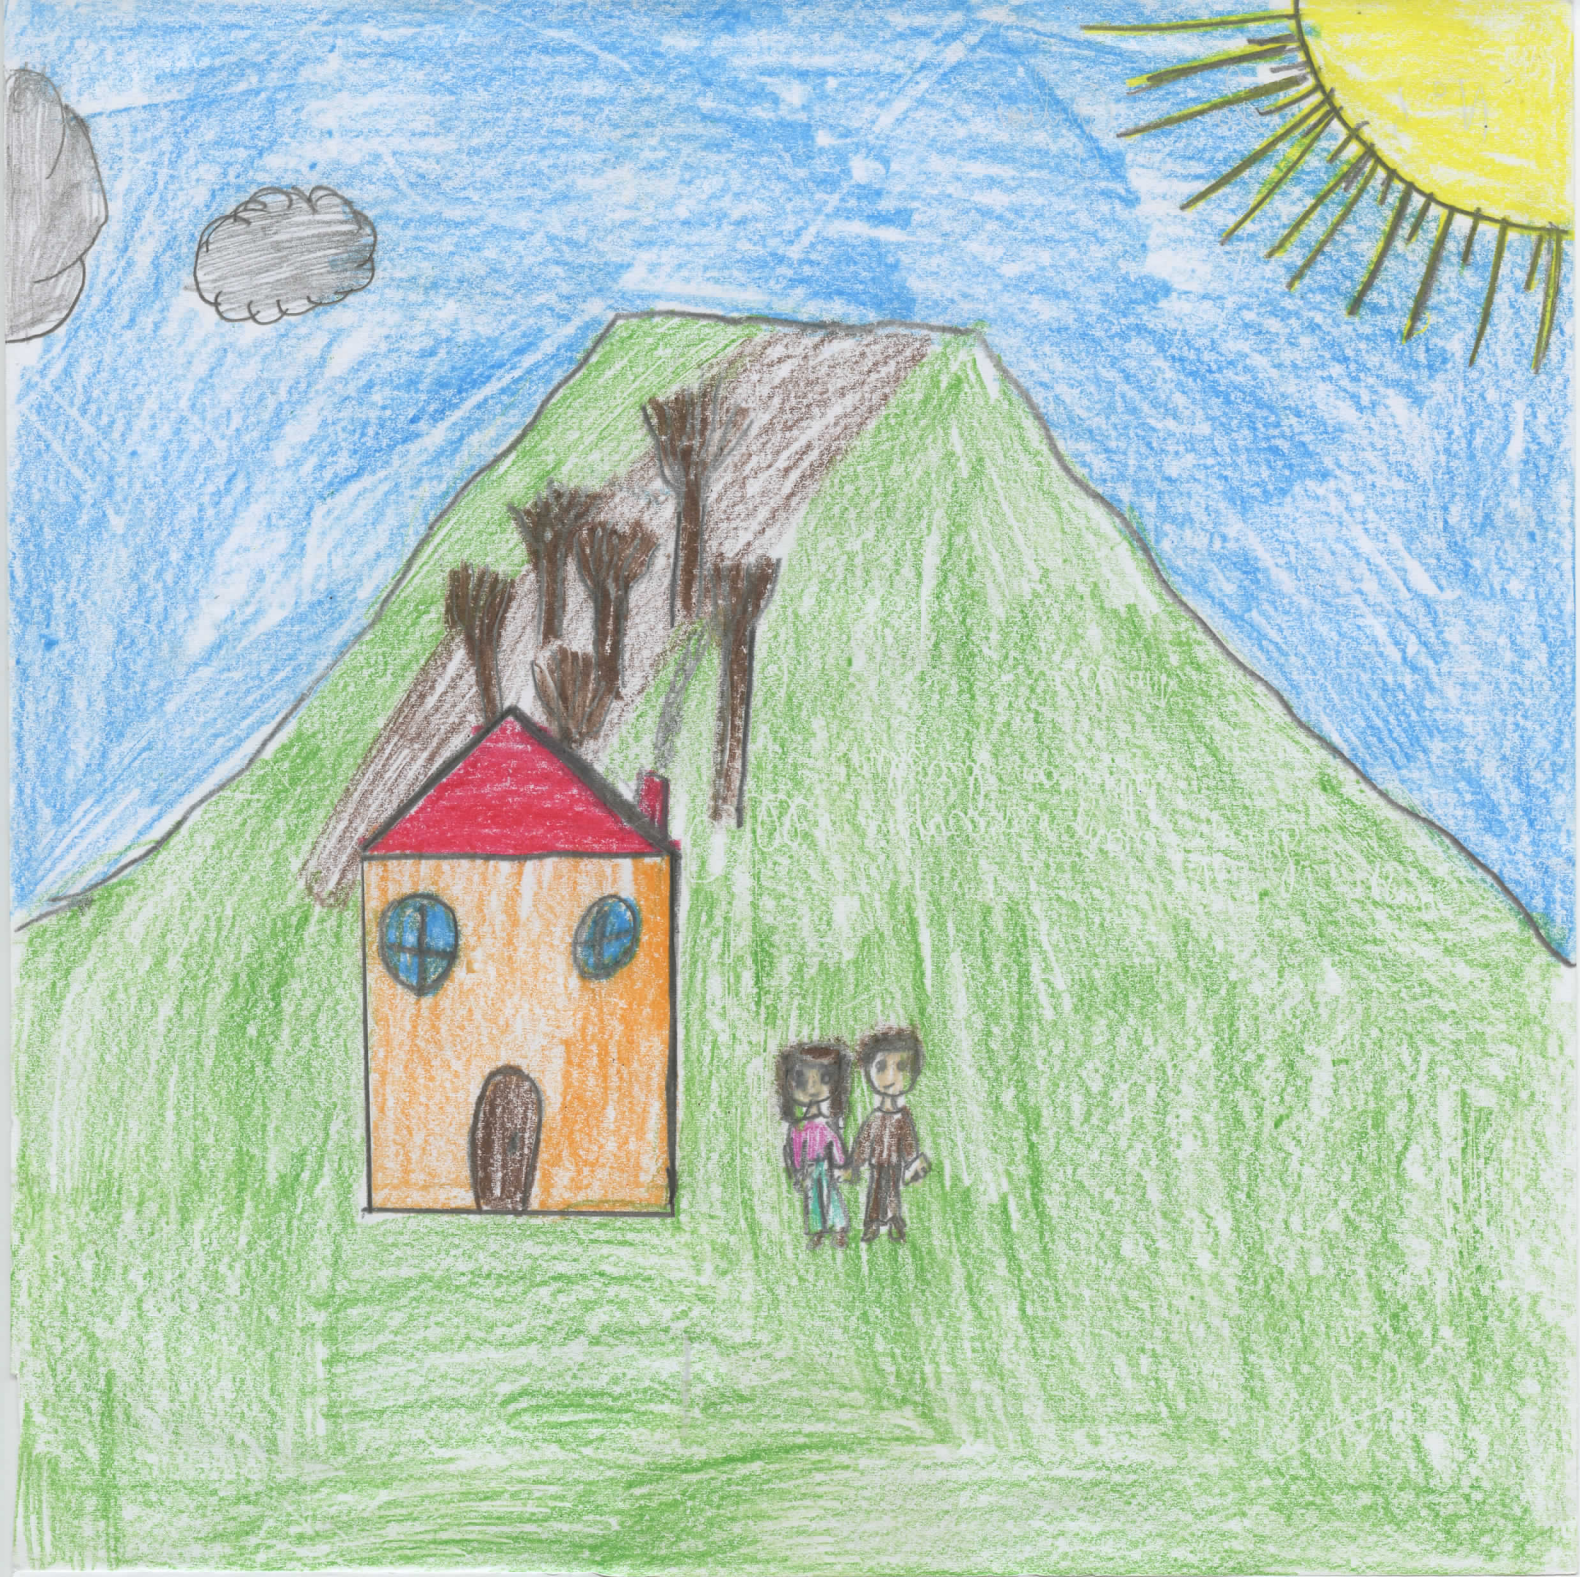

L'eruzione finì il mugnaio e sua moglie tornarono <sup>o cose</sup> ~~tutti felici e contenti.~~ <sup>che vissero</sup>



**Supplement 1b.** Example story (frames 1-4) from Anonymous Student 2.

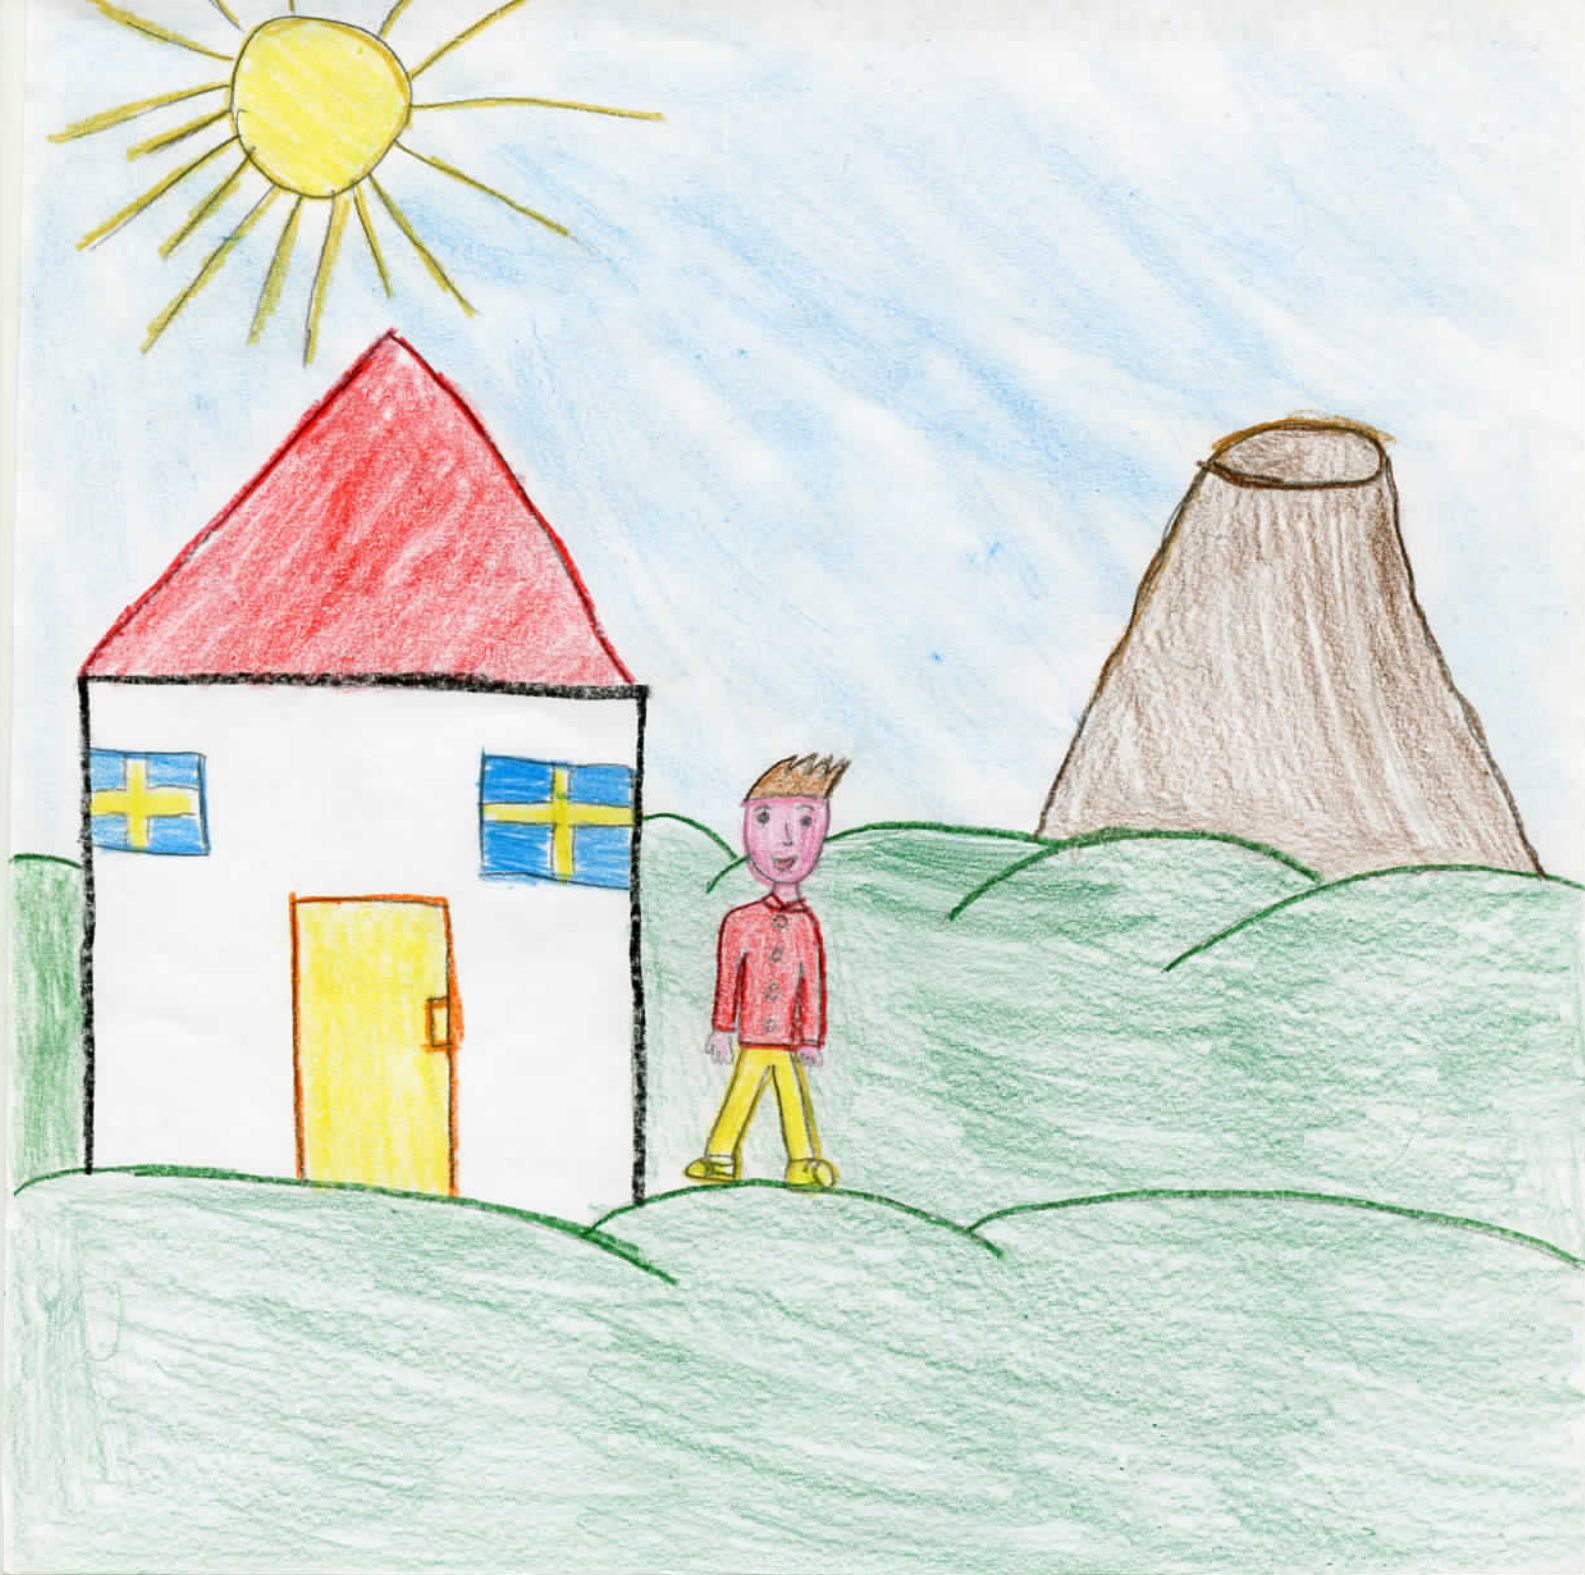

L'era una volta un bambino di nome Mareo che vissera vicino ad un vulcano, in una piccola casa.

Mareo vissera con i genitori, che lavoravano sempre, e quindi lui rimanesse quasi sempre da solo.

Lui era giocherellone, scherzoso e amava il calcio.



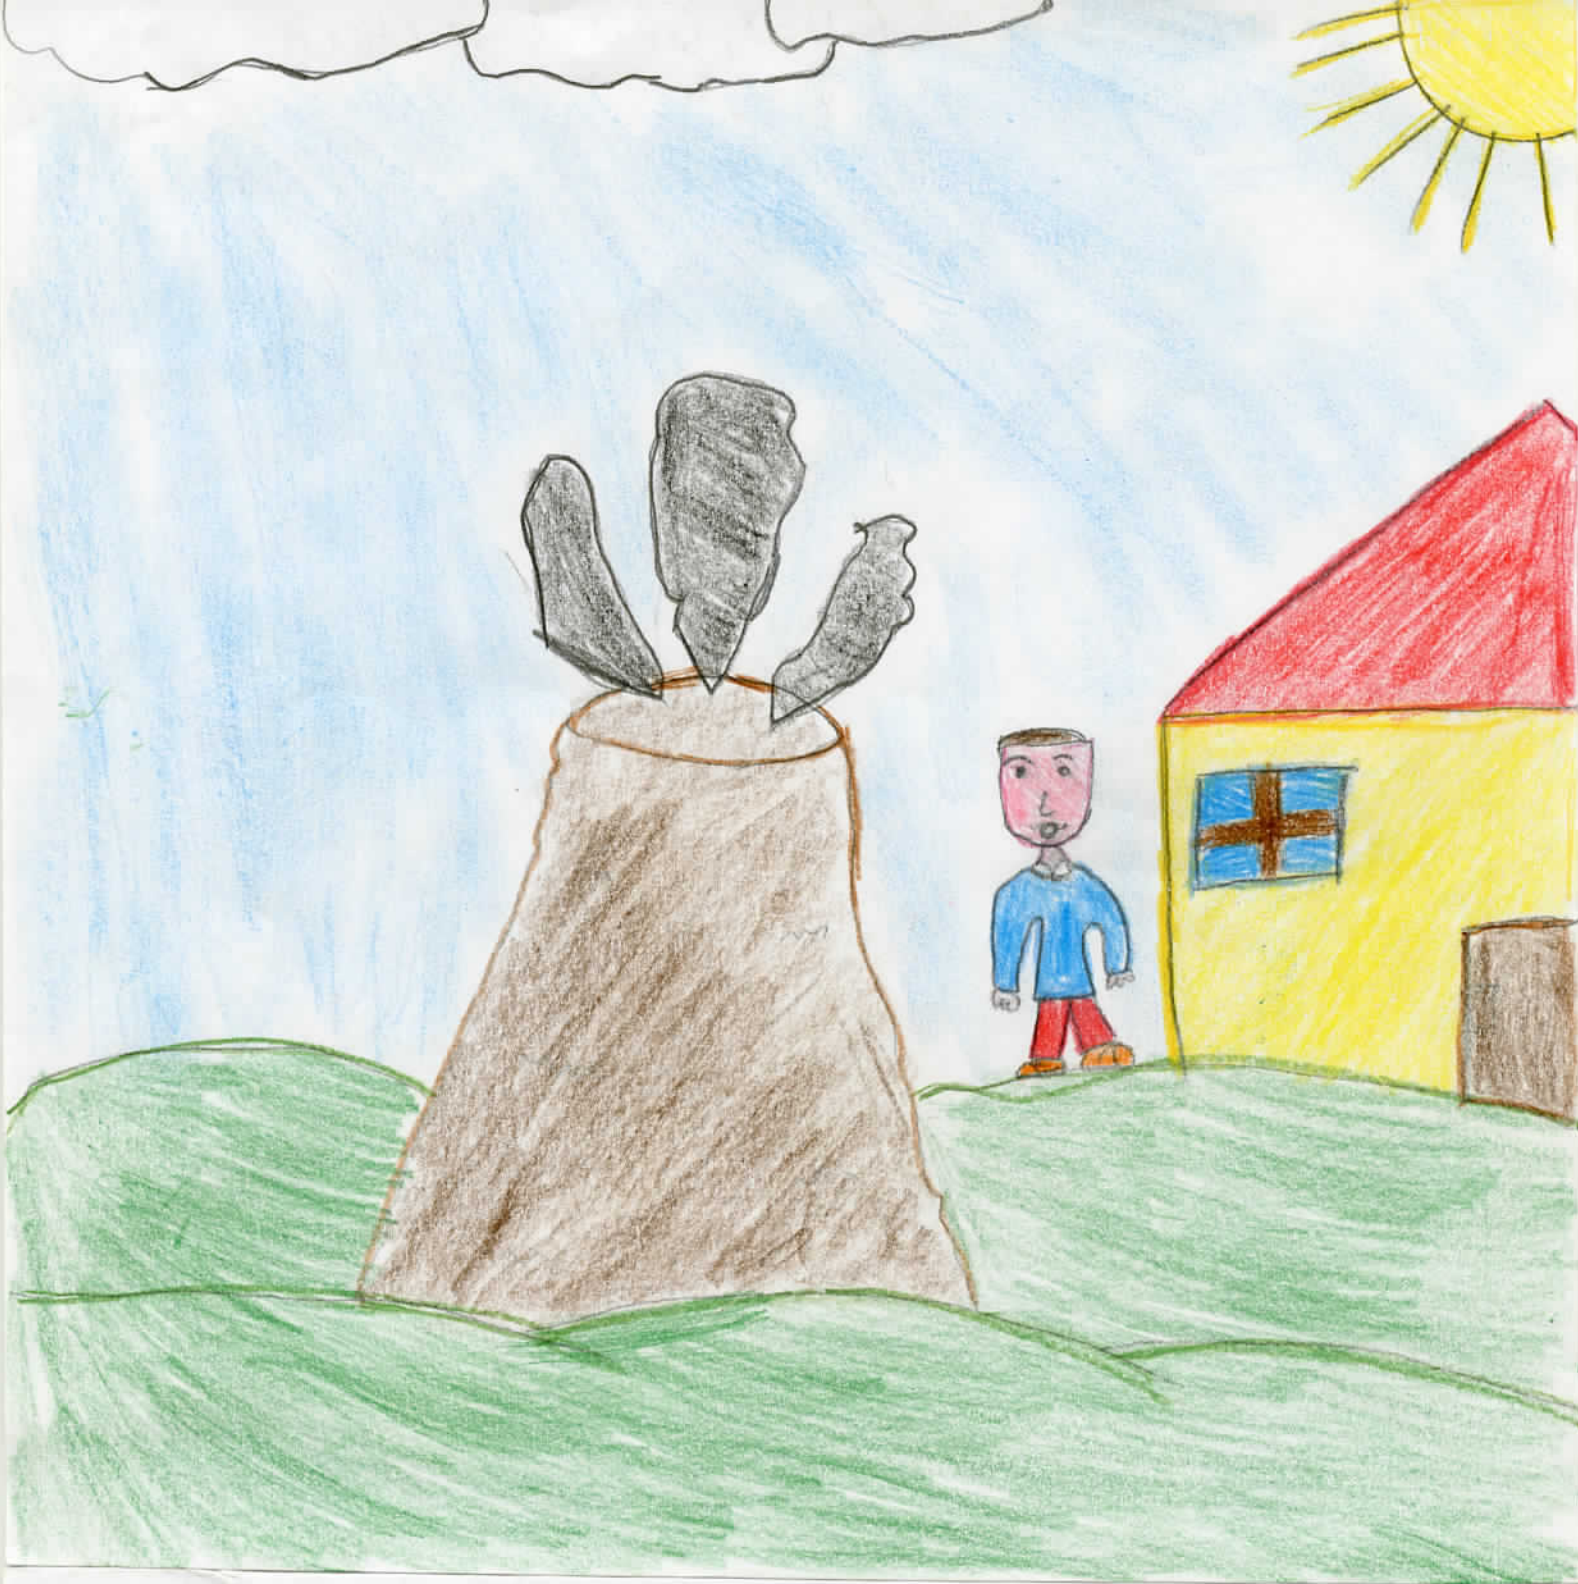

All' improvviso mentre il bambino guardava la T.V. senti un odore di bruciato e si precipitò dall' amico e mentre andava vide il vulcano pieno di fumo e cominciò a correre. ~~Il bambino~~  
Dopo averlo detto al bambino lo disse a tutta la città  
e ritornò a casa impaurito.



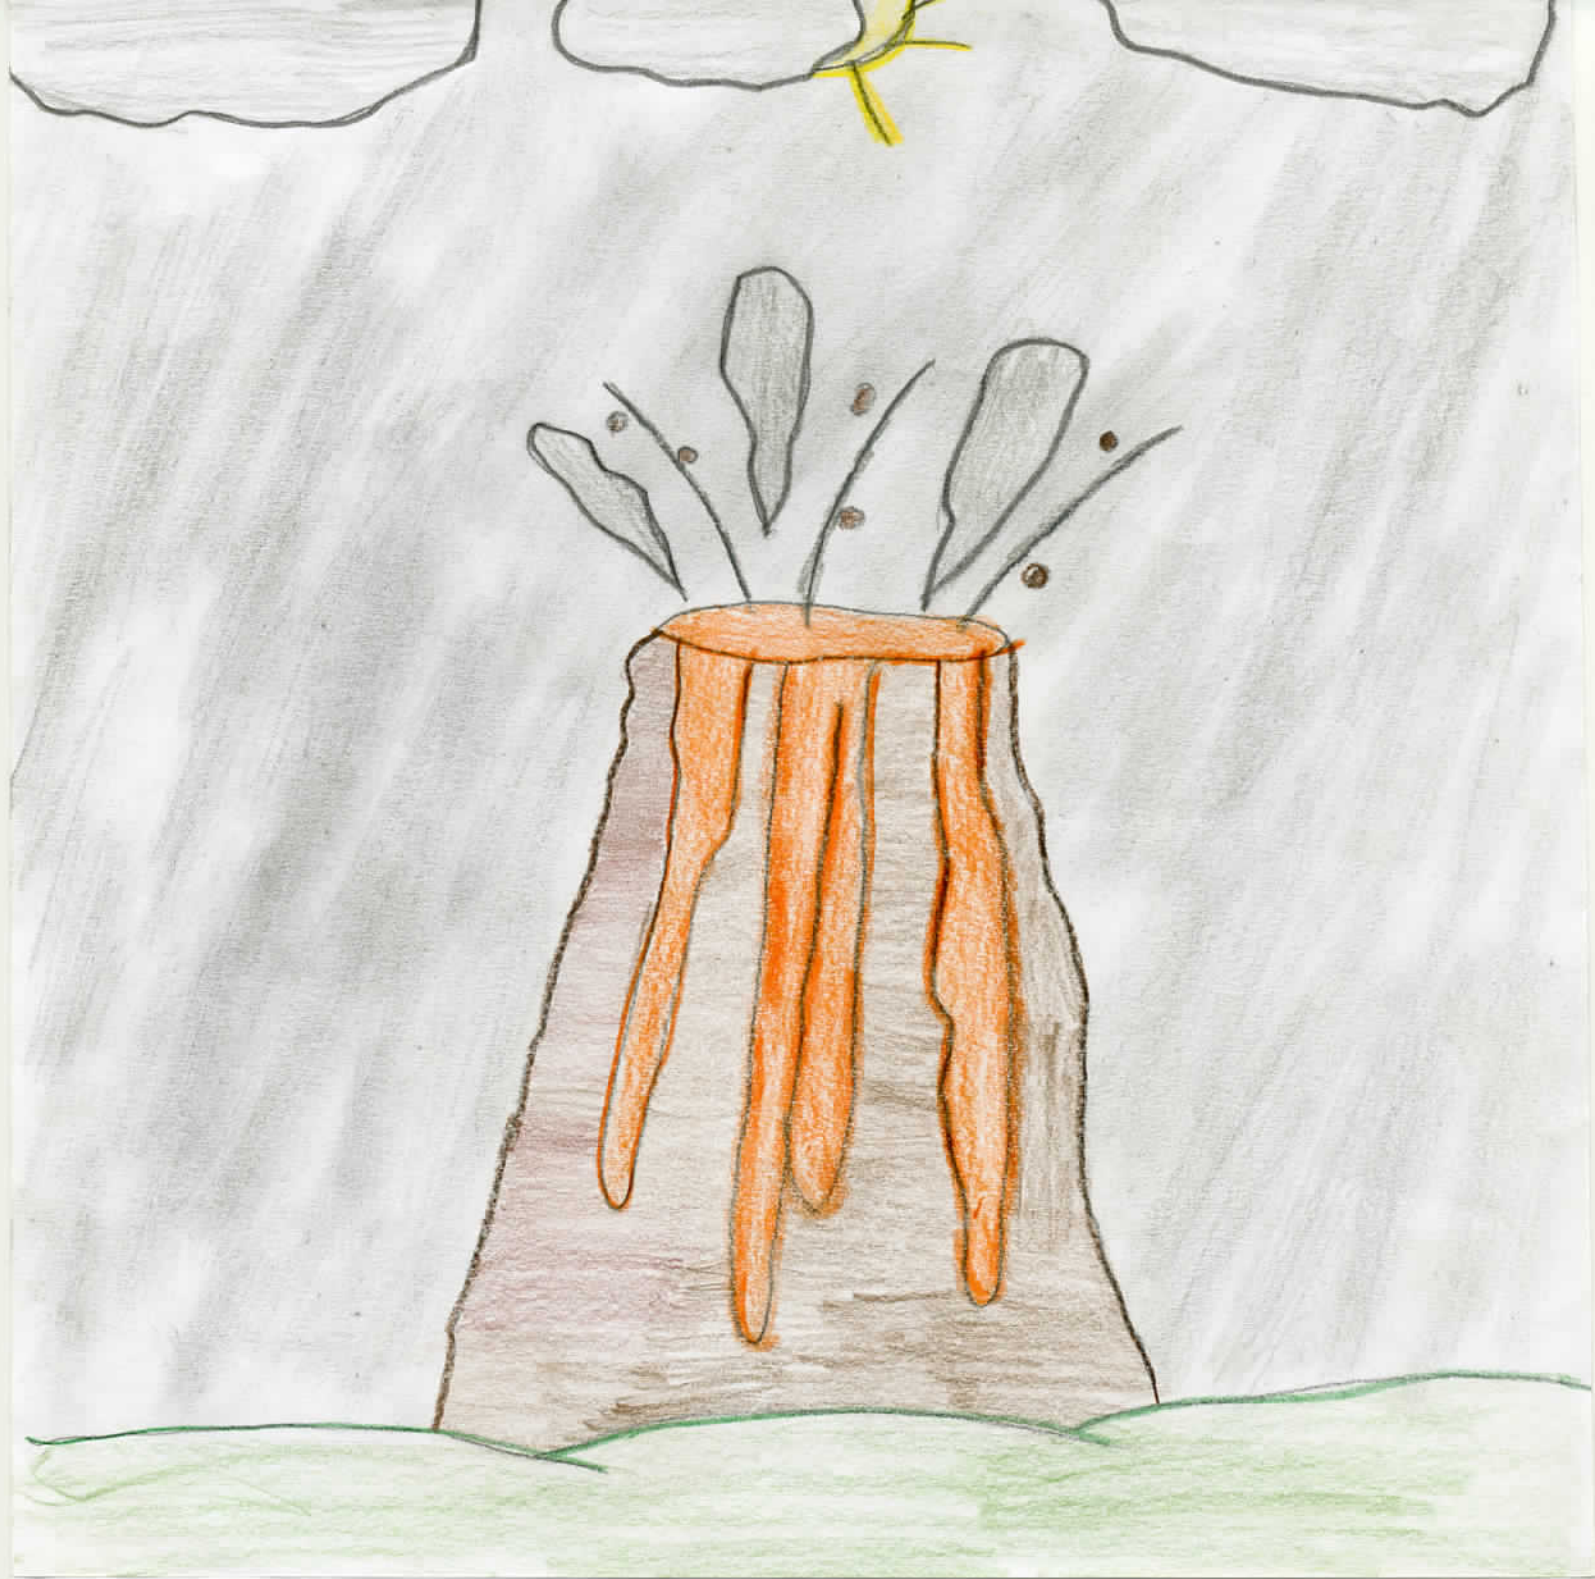

Stanza tornando da scuola e vide che il vulcano stava eruttando e si allarmò, cominciò ad urlarlo per tutta la città, mentre stanza attraversando la città, Marco incontrò il suo amico che lo aiutò a scappare via. Molta gente fu brava se ne andò e scampò il pericolo.



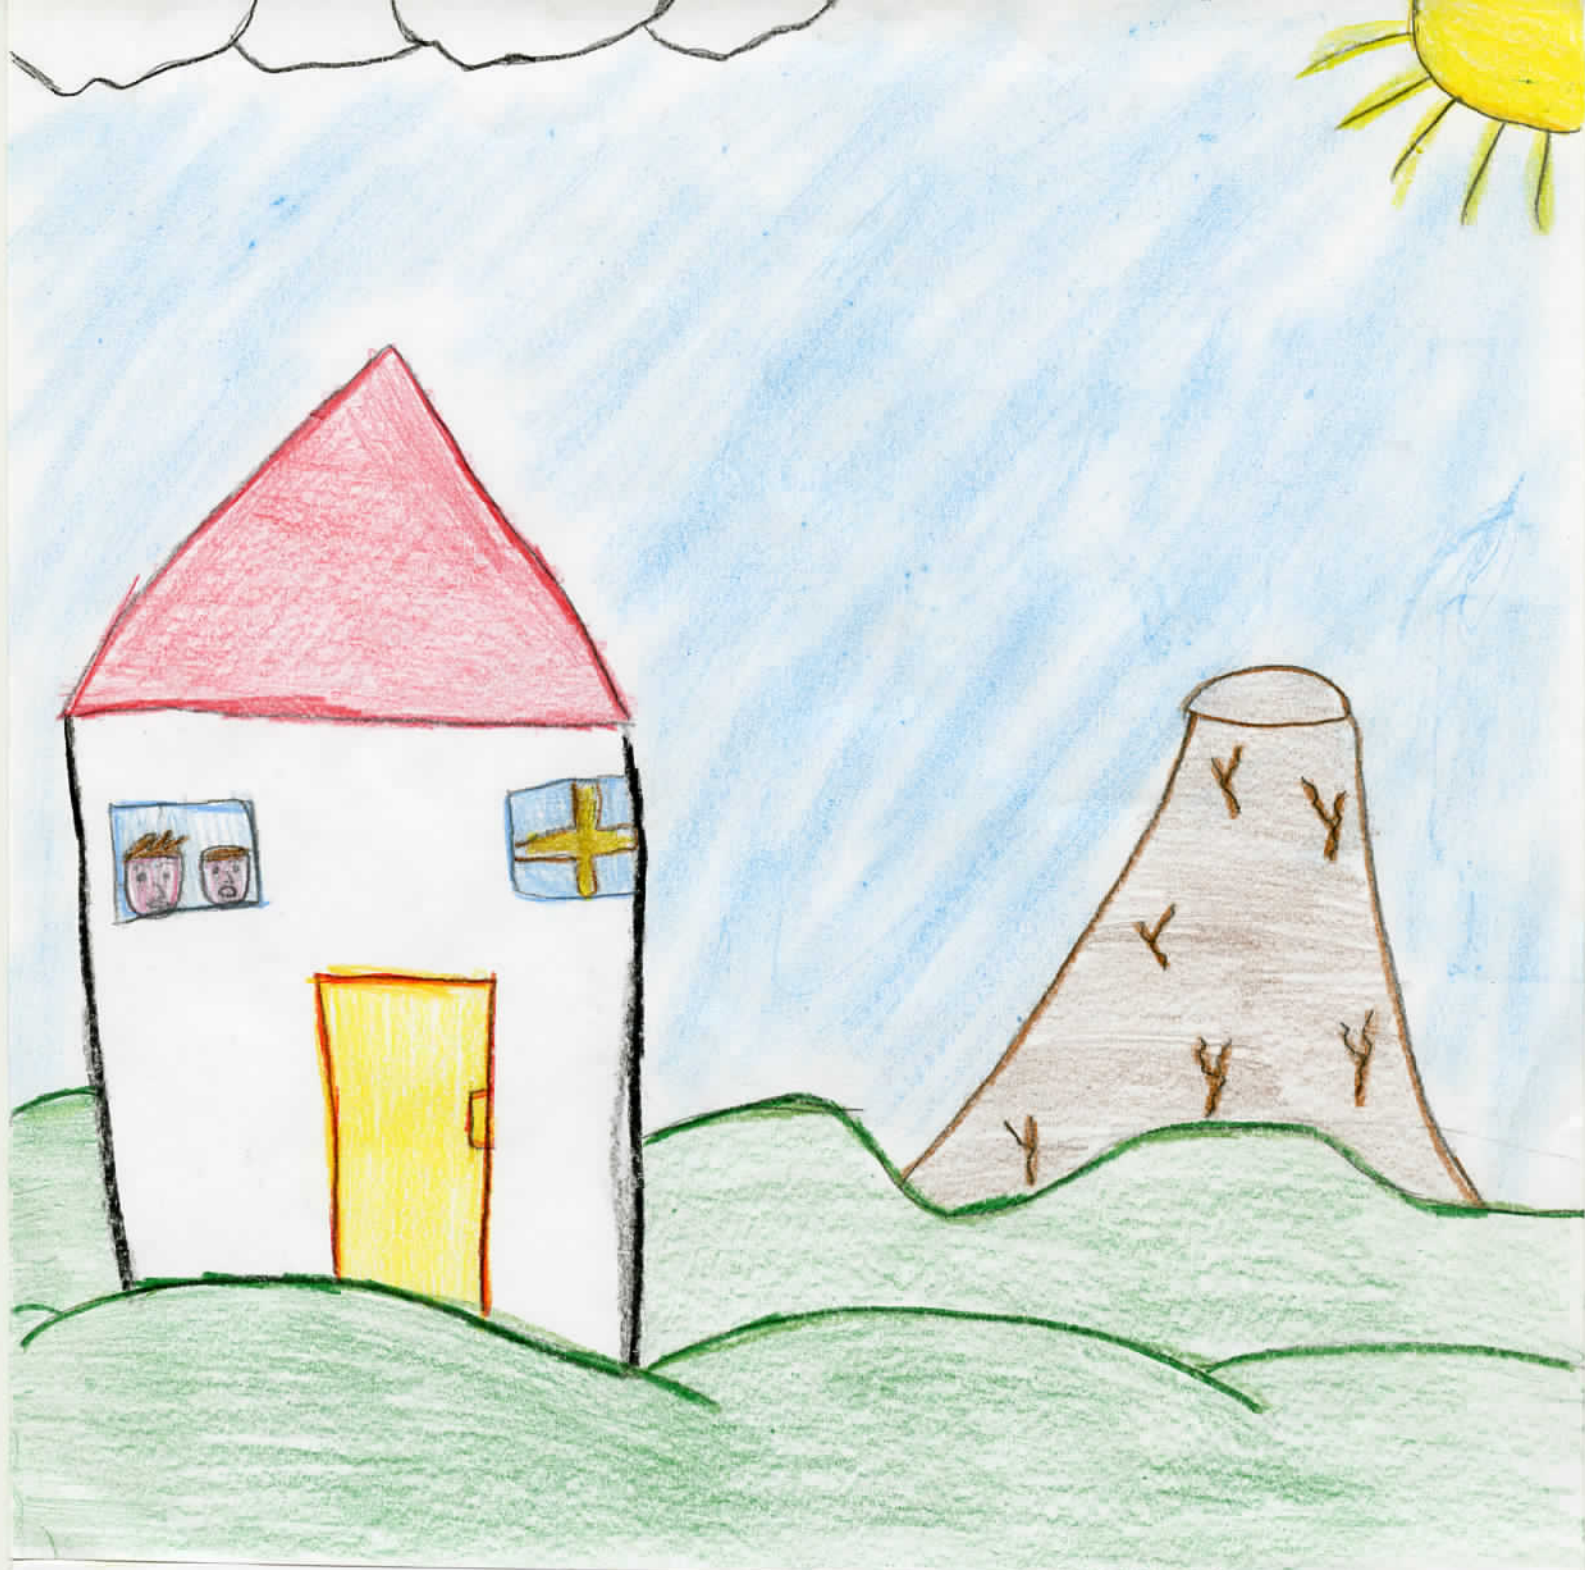

Marco e il suo amico erano chiusi dentro e assai impauriti, il Bombino vide dalla finestra, che il vulcano aveva finito di eruttare e ~~vide anche~~ che tutto il paesaggio era distrutto. Marco e il suo amico ~~erano~~ per fortuna erano ~~salvi~~ salvi ~~compresi~~. Il Bombino quando vide i genitori di ~~salvare~~ ~~salvare~~, l'avventura di Marco finisce qui.

**Supplement 1c.** Example story (frames 1-4) from Anonymous Student 3.



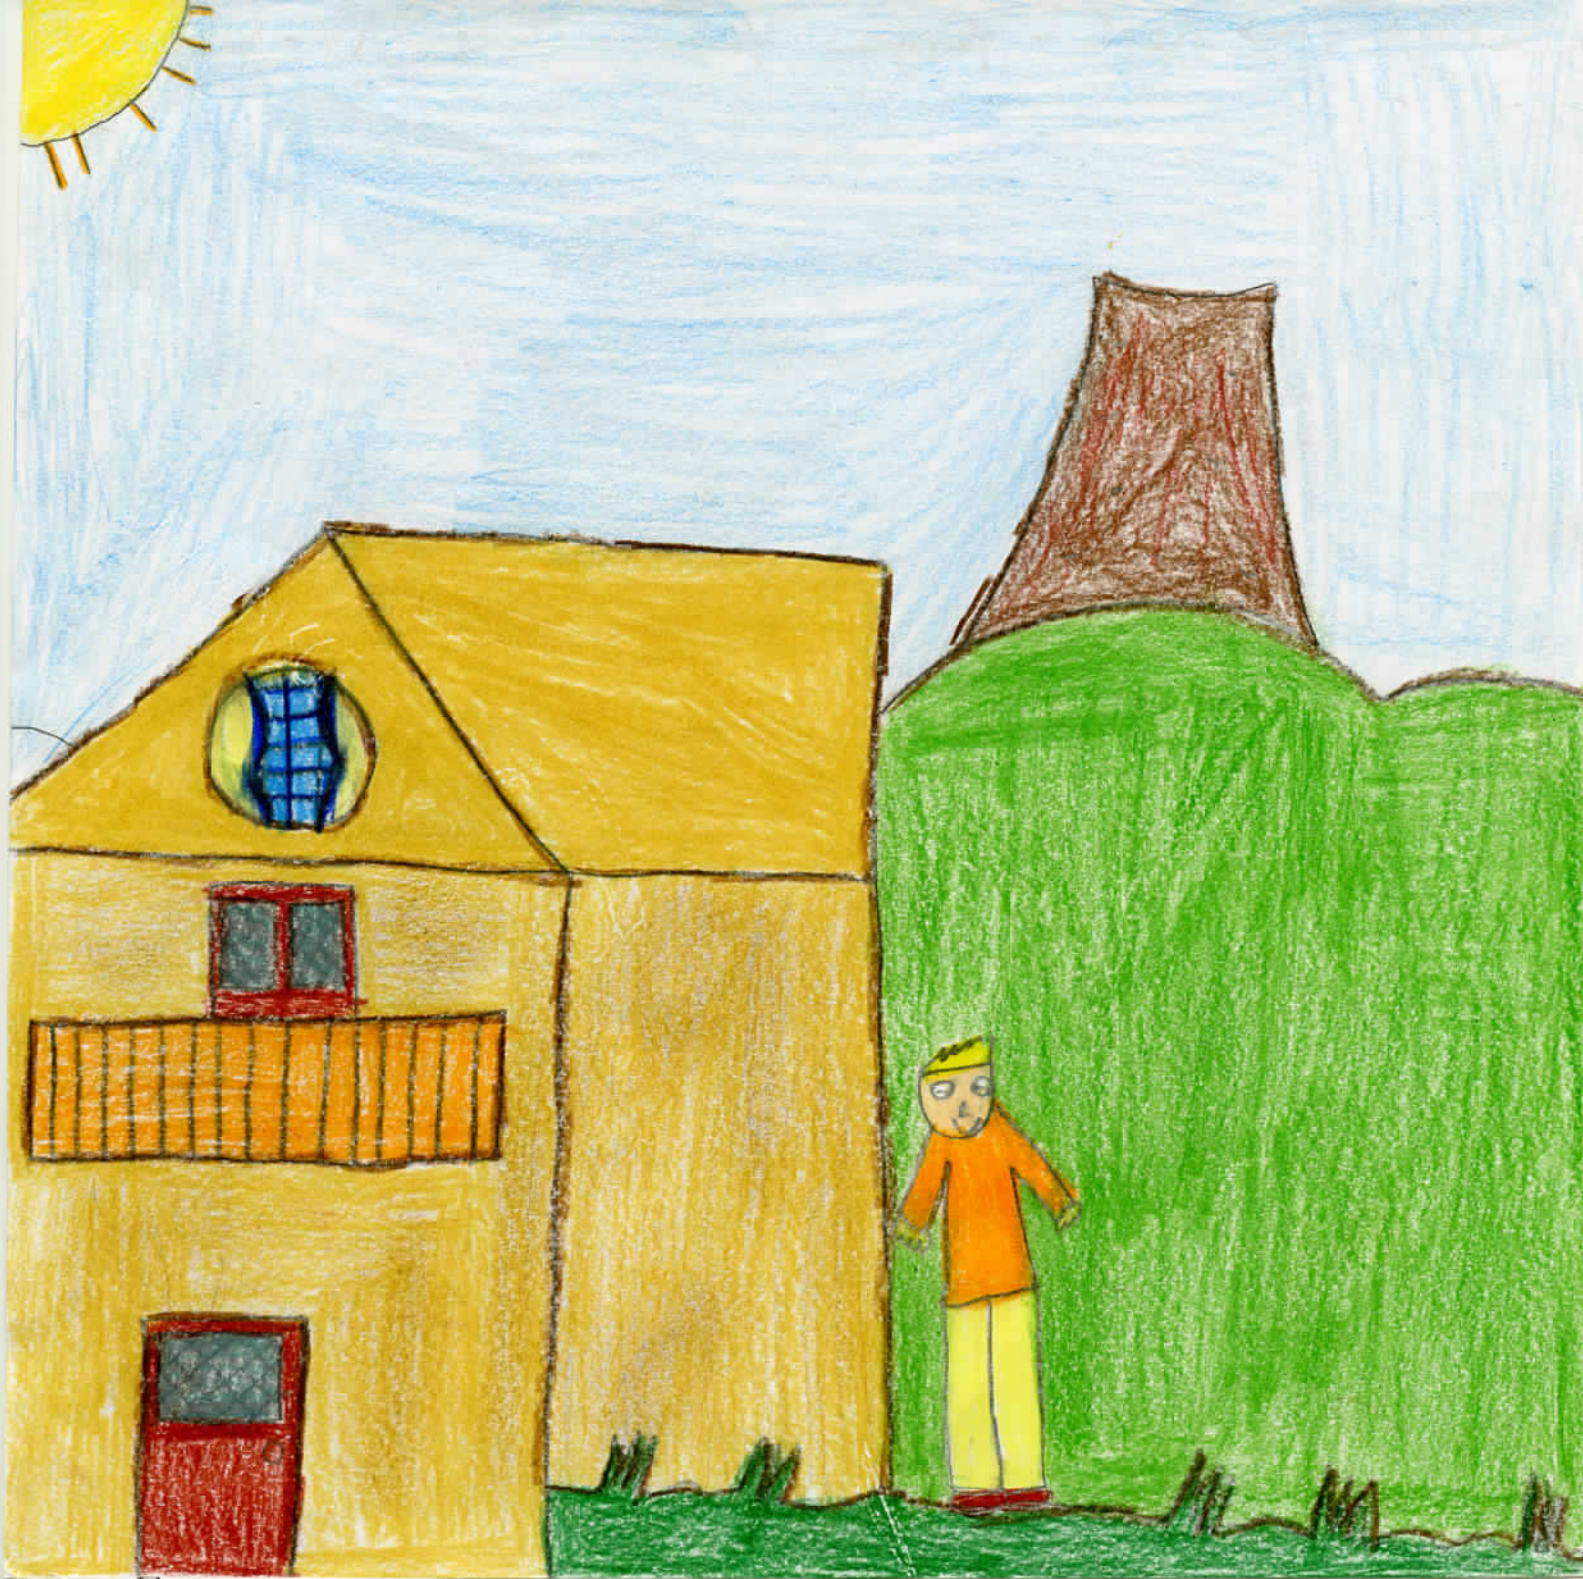

~~Questo ragazzo di nome Oscar vive vicino al vulcano di nome Etna.~~

QUESTO ragazzo DI NOME OSCAR VIVE VICINO AL VULCANO  
DI NOME ETNA



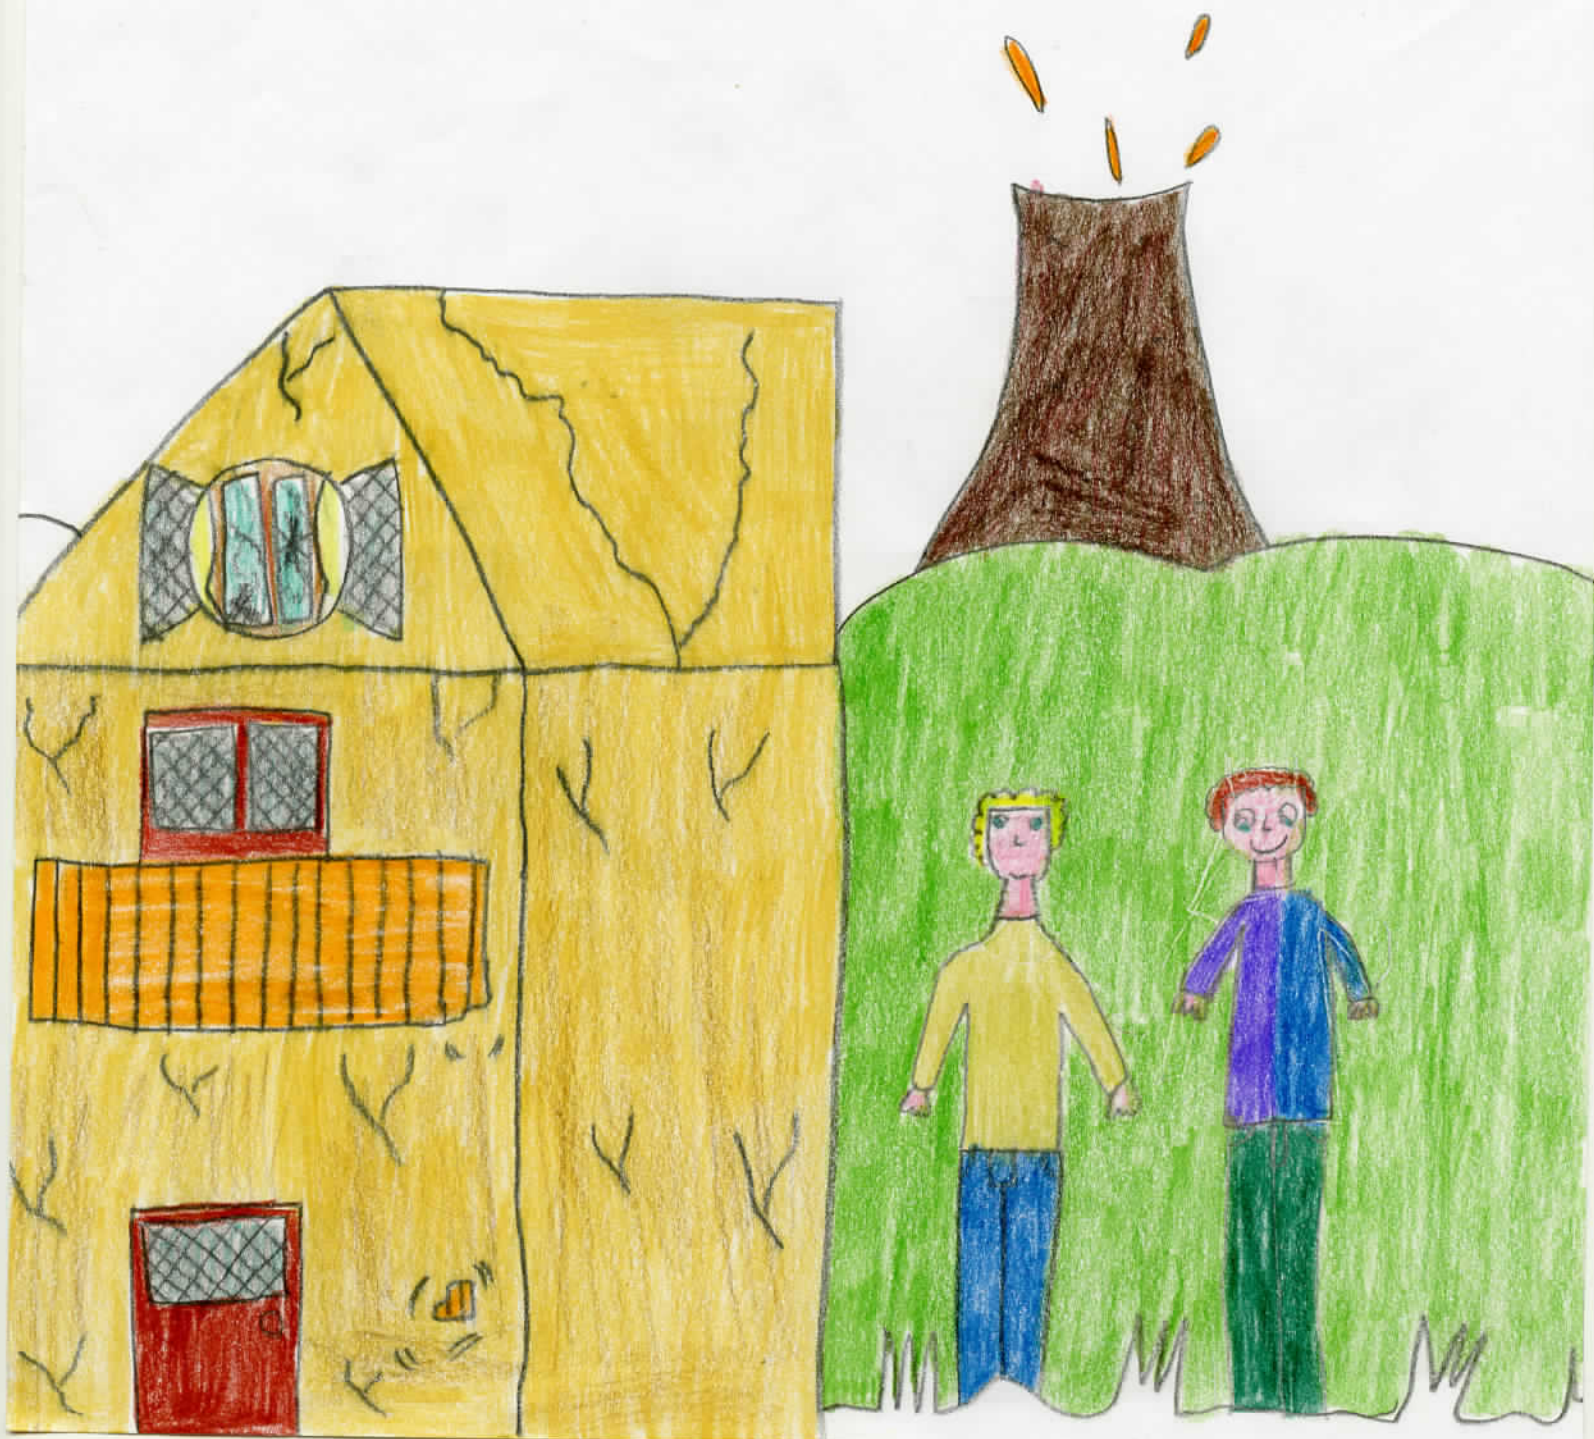

OSCAR SENTE DELLE SCOSSE DI TERREMOTO, ENE VA A PARLARE  
CON SUO PADRE, SI SPAVENTA E GLI VIENE LA VOGLIA DI  
SCAPPARE MA NON LO FA PERCHÉ IL PADRE GLI ELO ~~NEGA~~.  
IMPEDISCE



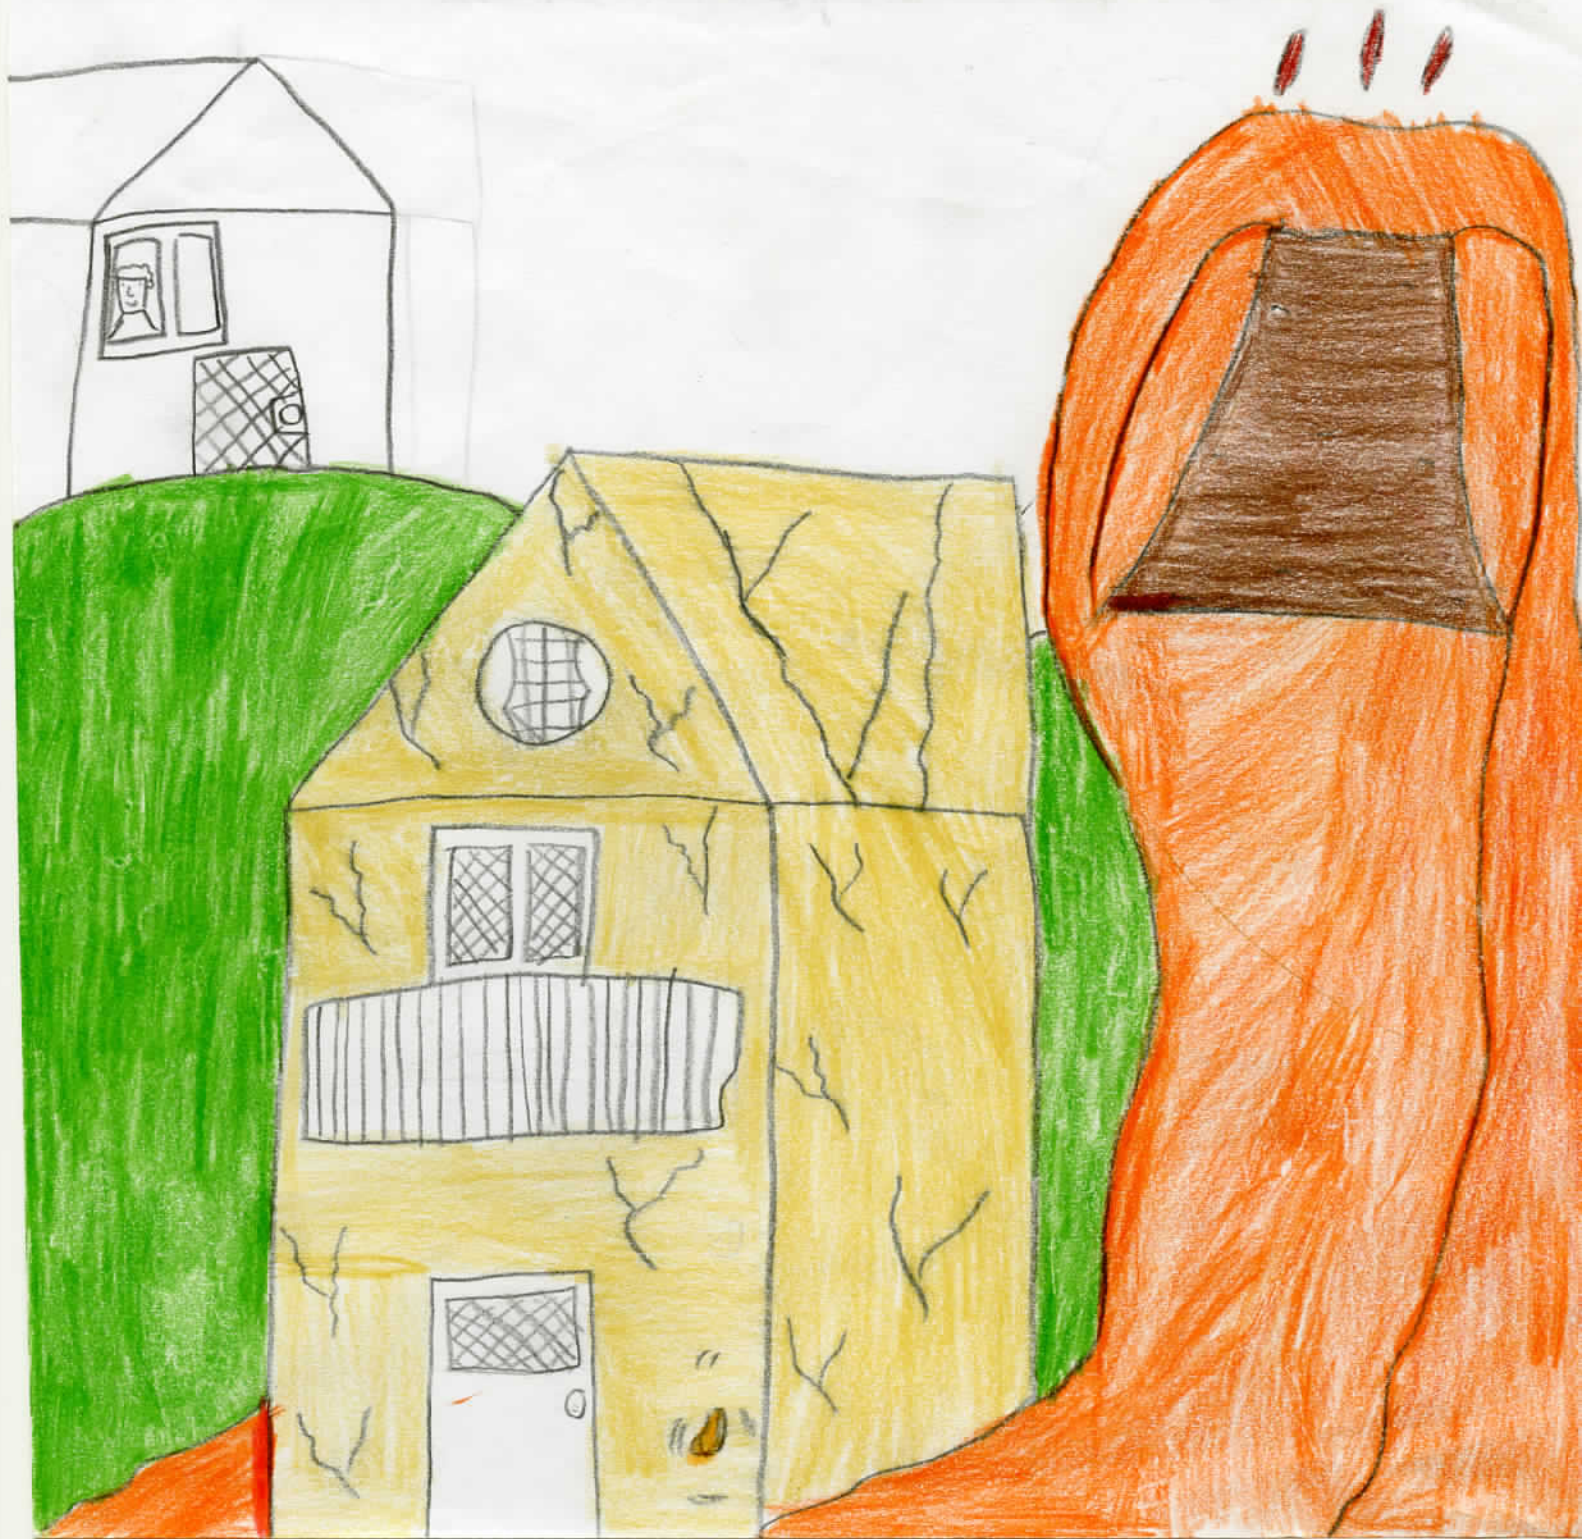

OSCAR VA DALLA NONNNA CHE VIVE SU UNA  
MONTAGNA. DURANTE L'ERUZIONE OSCAR SCAPPA CON LA  
NONNA



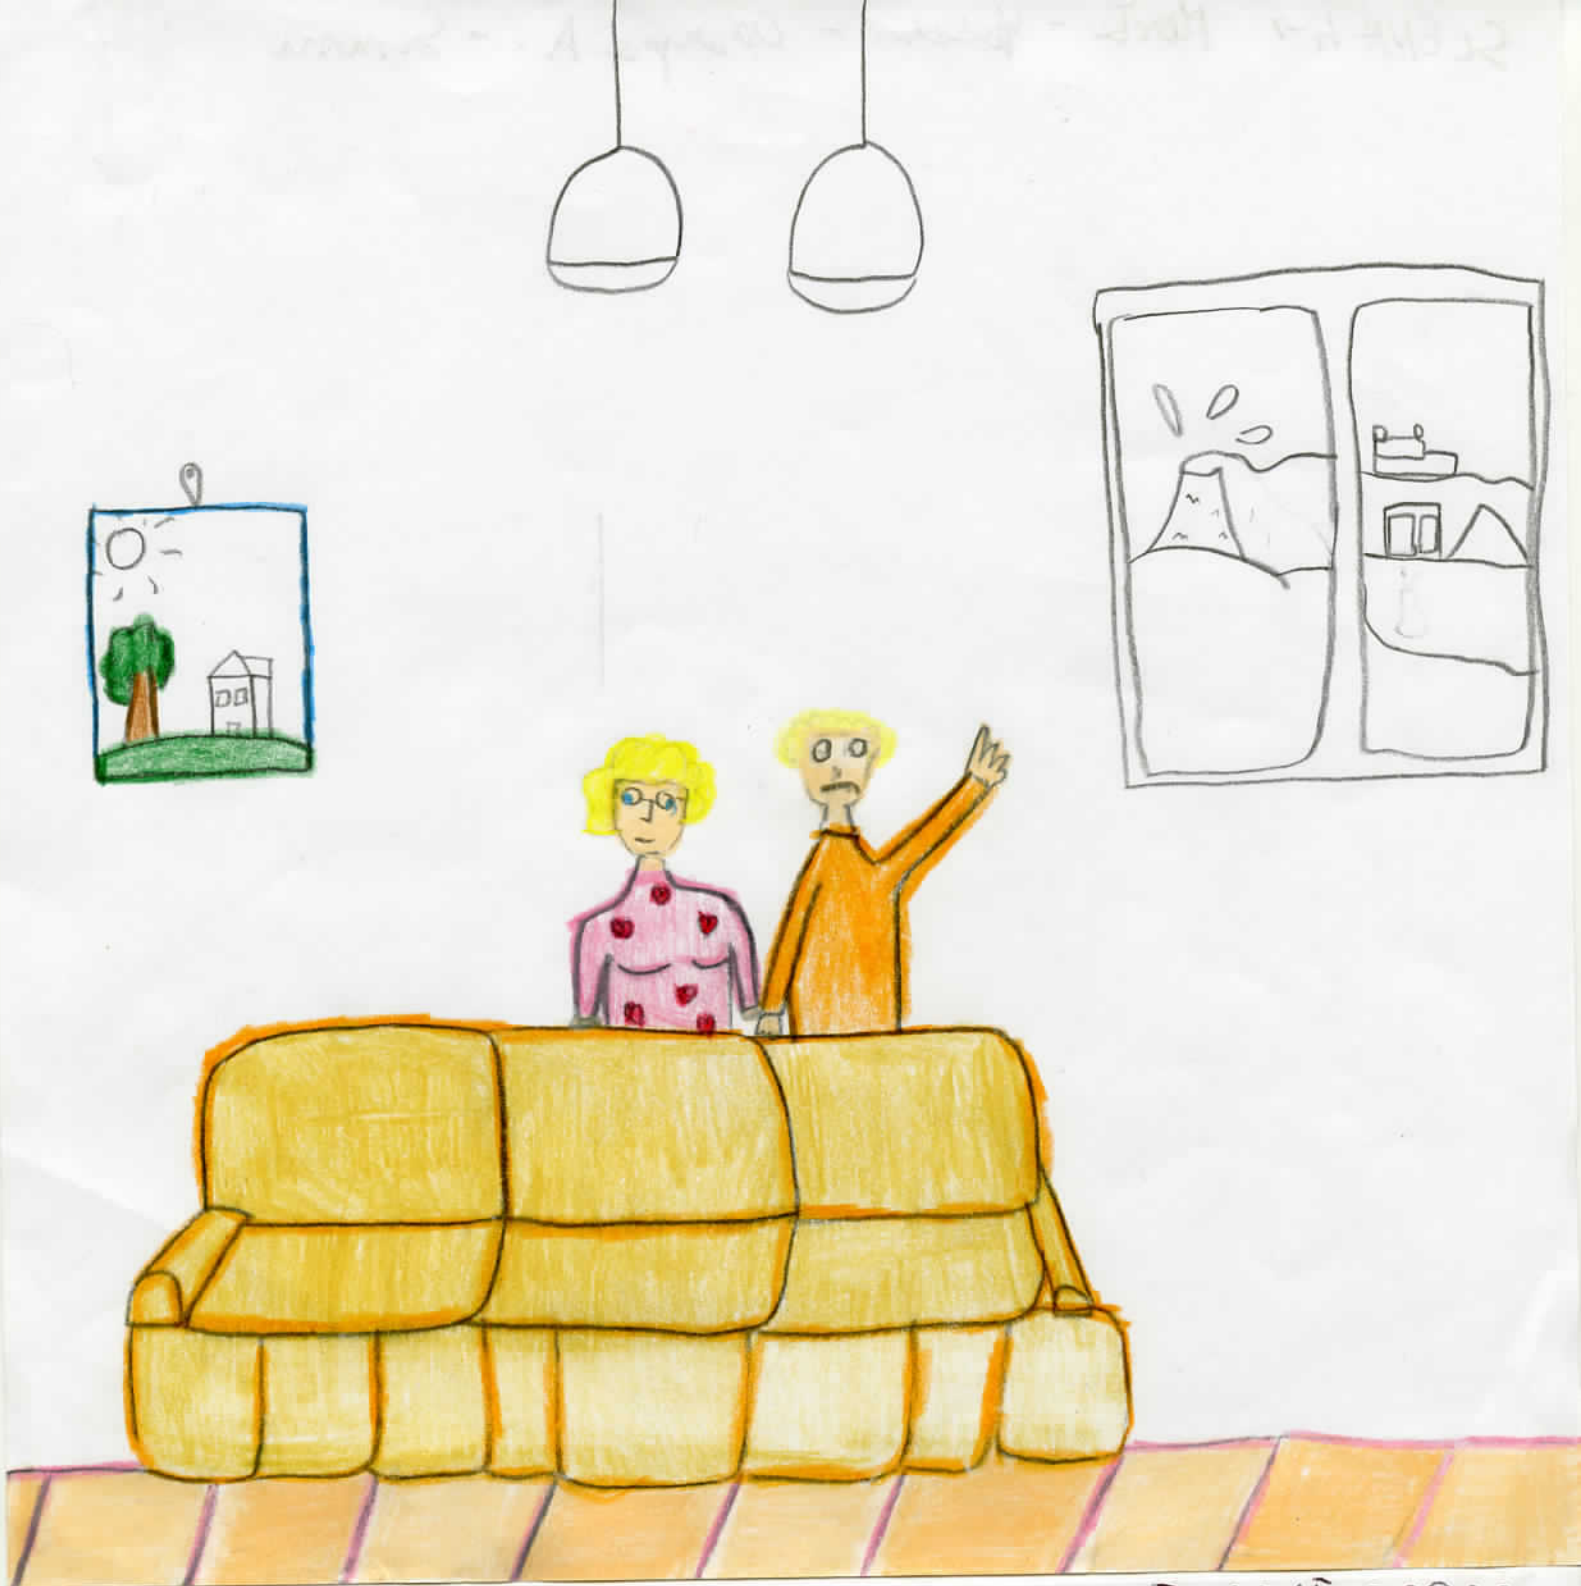

IL PROTAGONISTA STA DALLA NONNA. OSCAR STA BENE. OSCAR  
GUARDA DALLA FINESTRA LA SUA CASA. LA SUA CASA È ROLLATA

**Supplement 1d.** Example story (frames 1-4) from Anonymous Student 4.



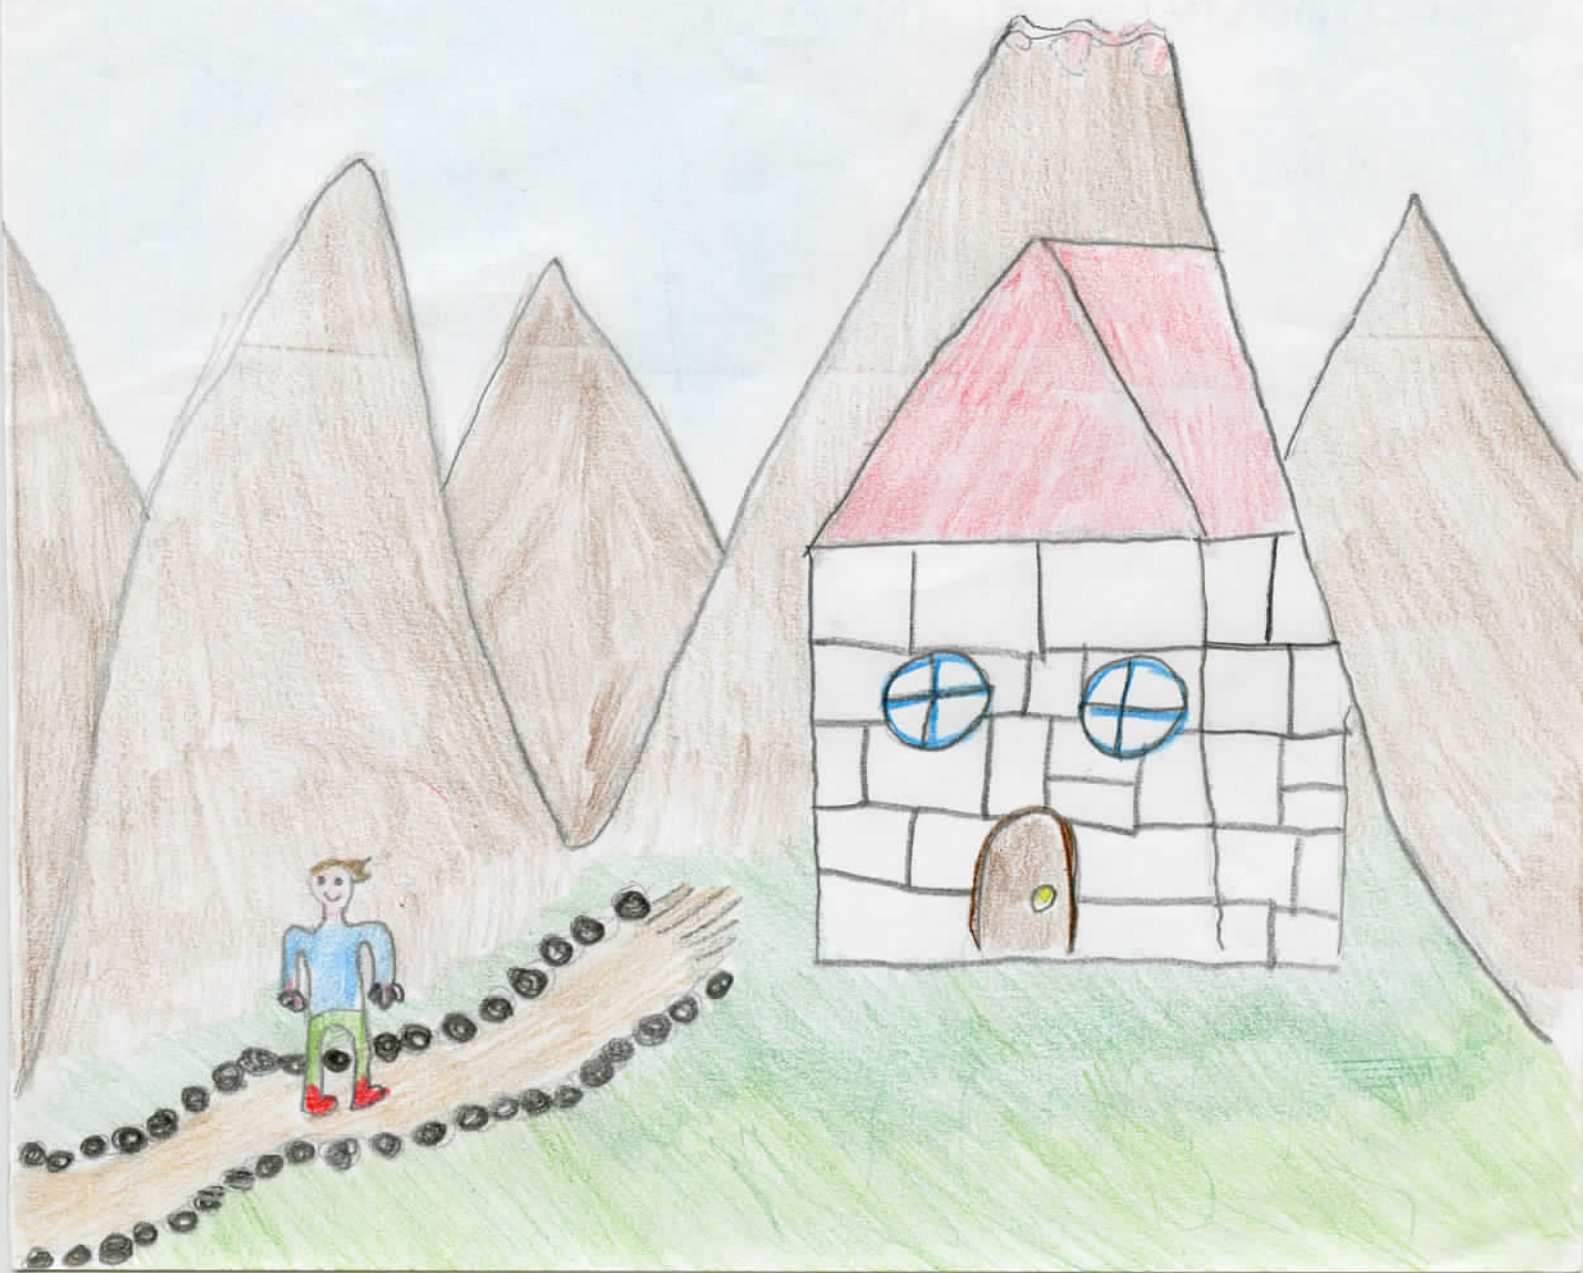

C'era una volta un uomo di nome Eugenio, esso  
abitava in un vulcano.

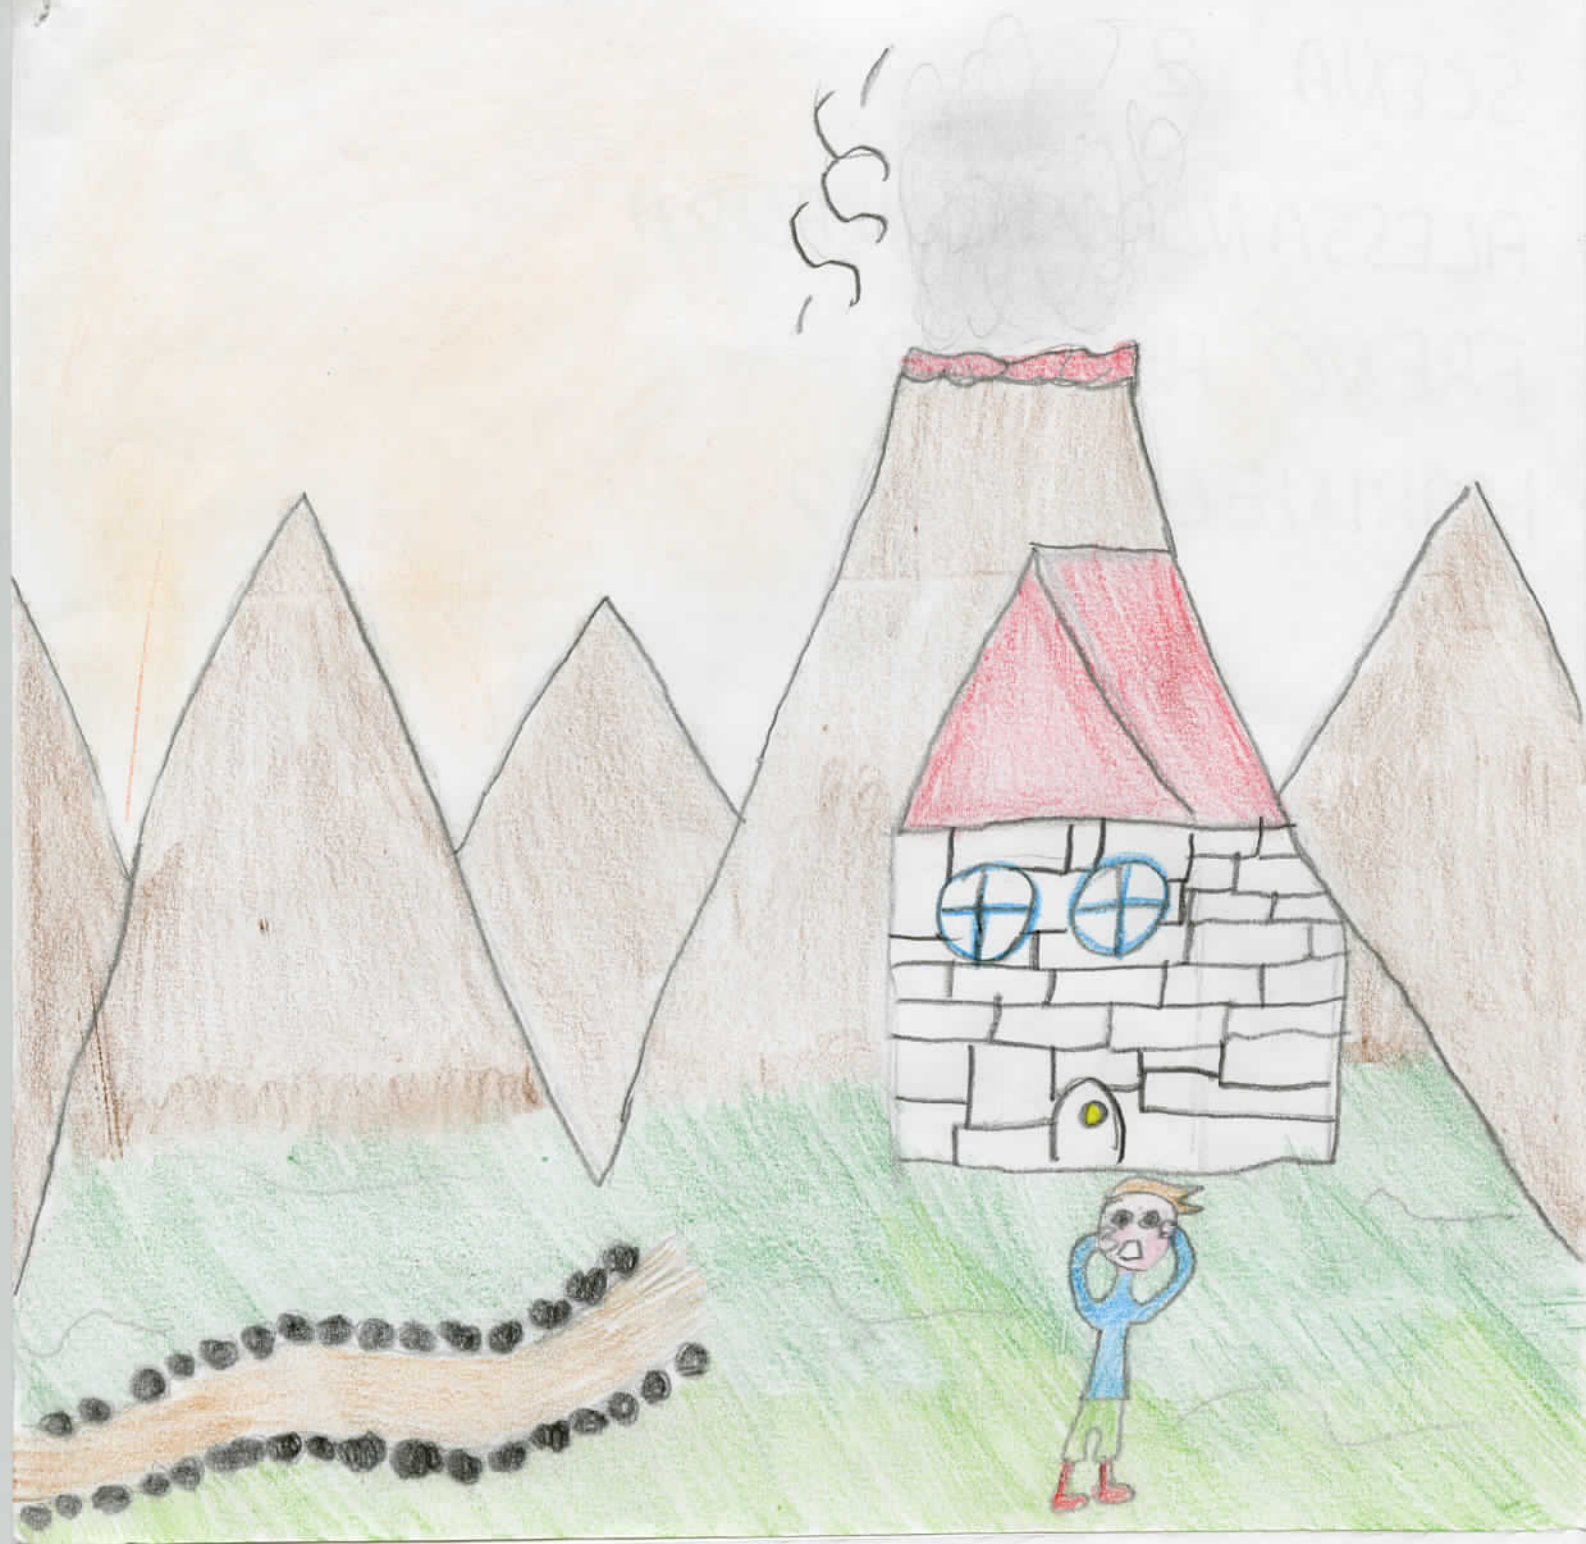

Dopo un po' Eugenio si accorse che la Terra  
tremava e cominciò ad uscire il fumo dal vulcano.  
Poi chiamò il 115 e li aspettò con molta pazienza.



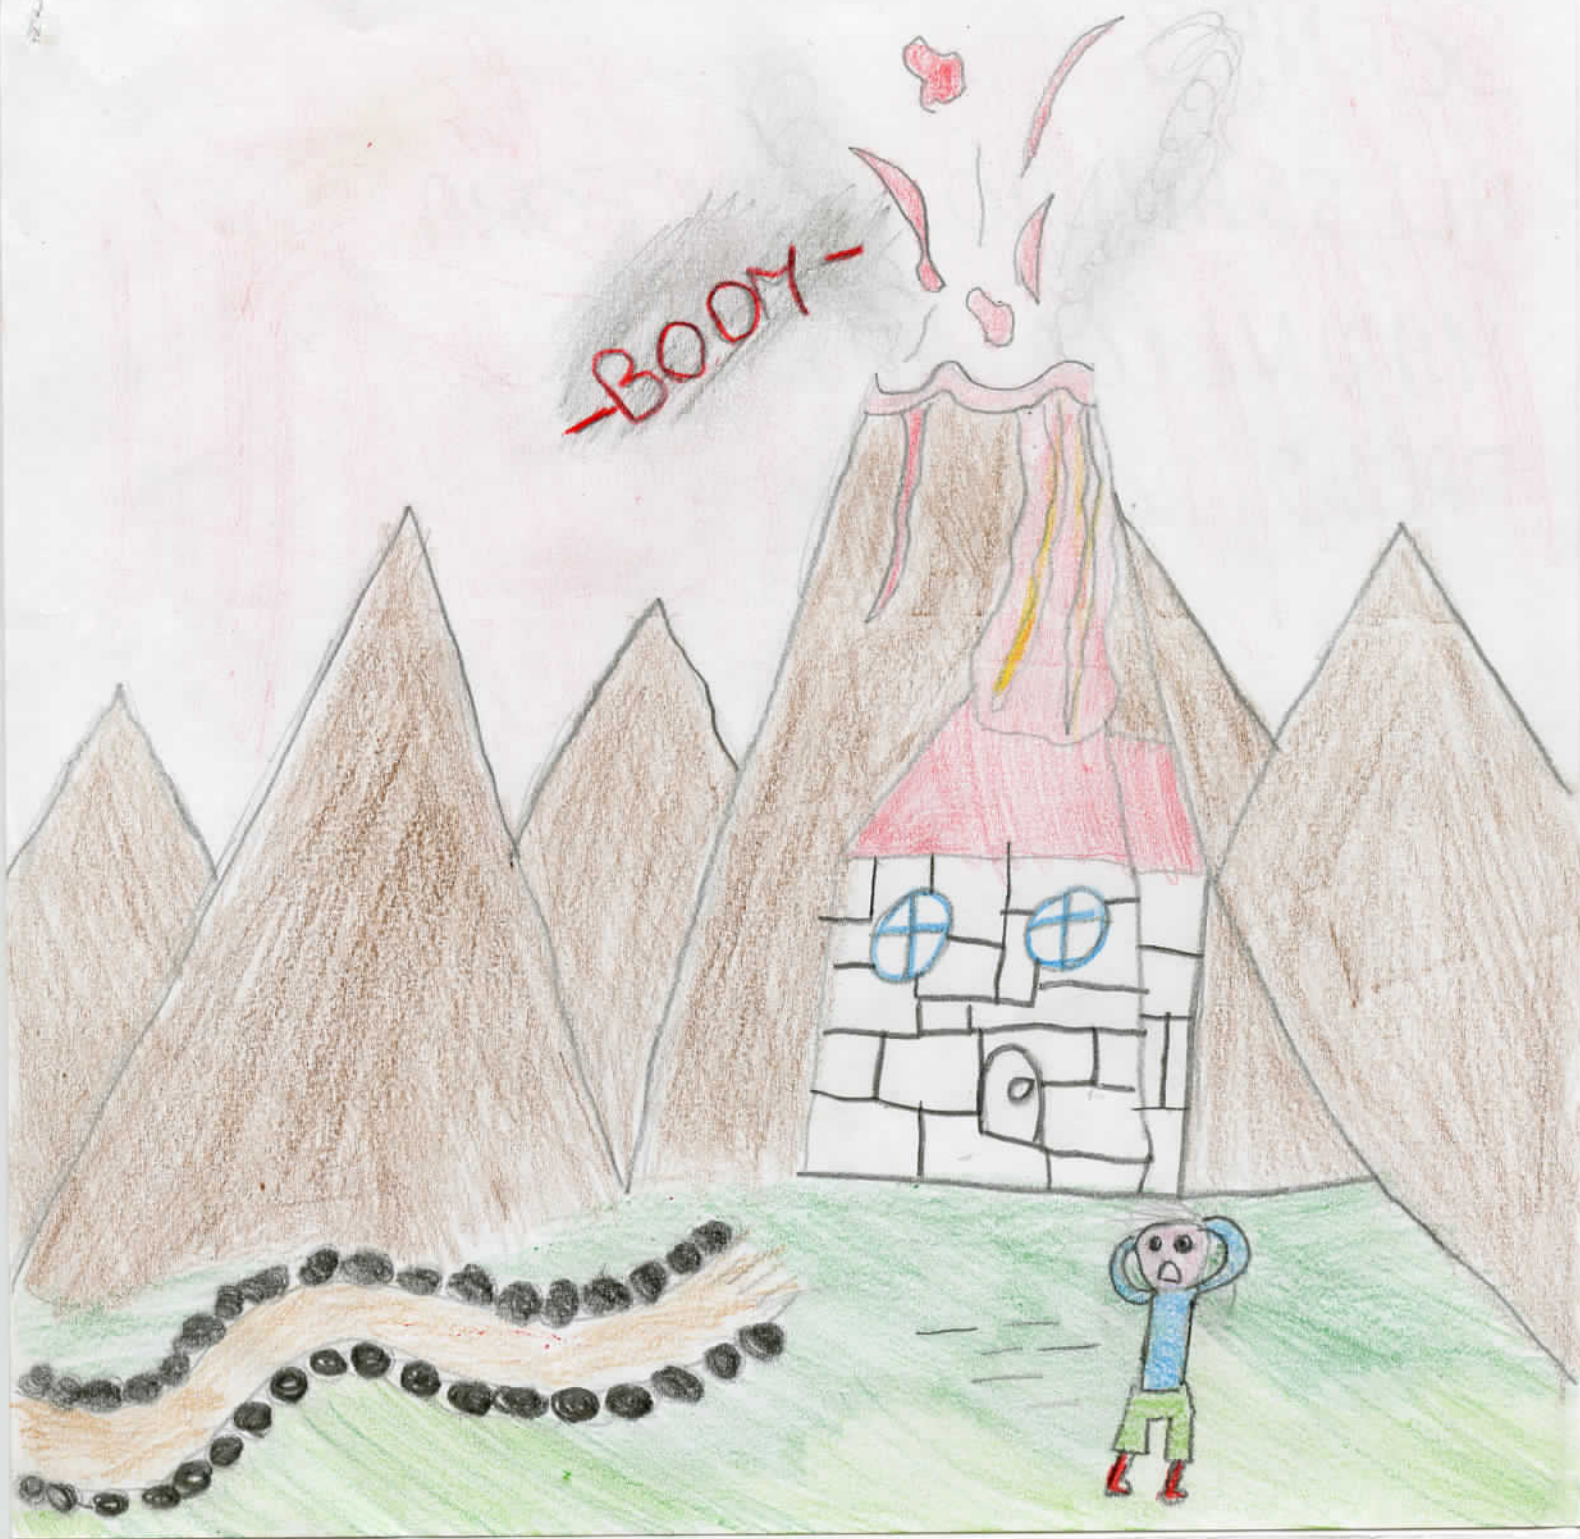

Oh no! Il vulcano sta eruttando, mentre i pompieri  
hanno venuto il signor Eugenio corre a destra e a  
sinistra cercando una soluzione.

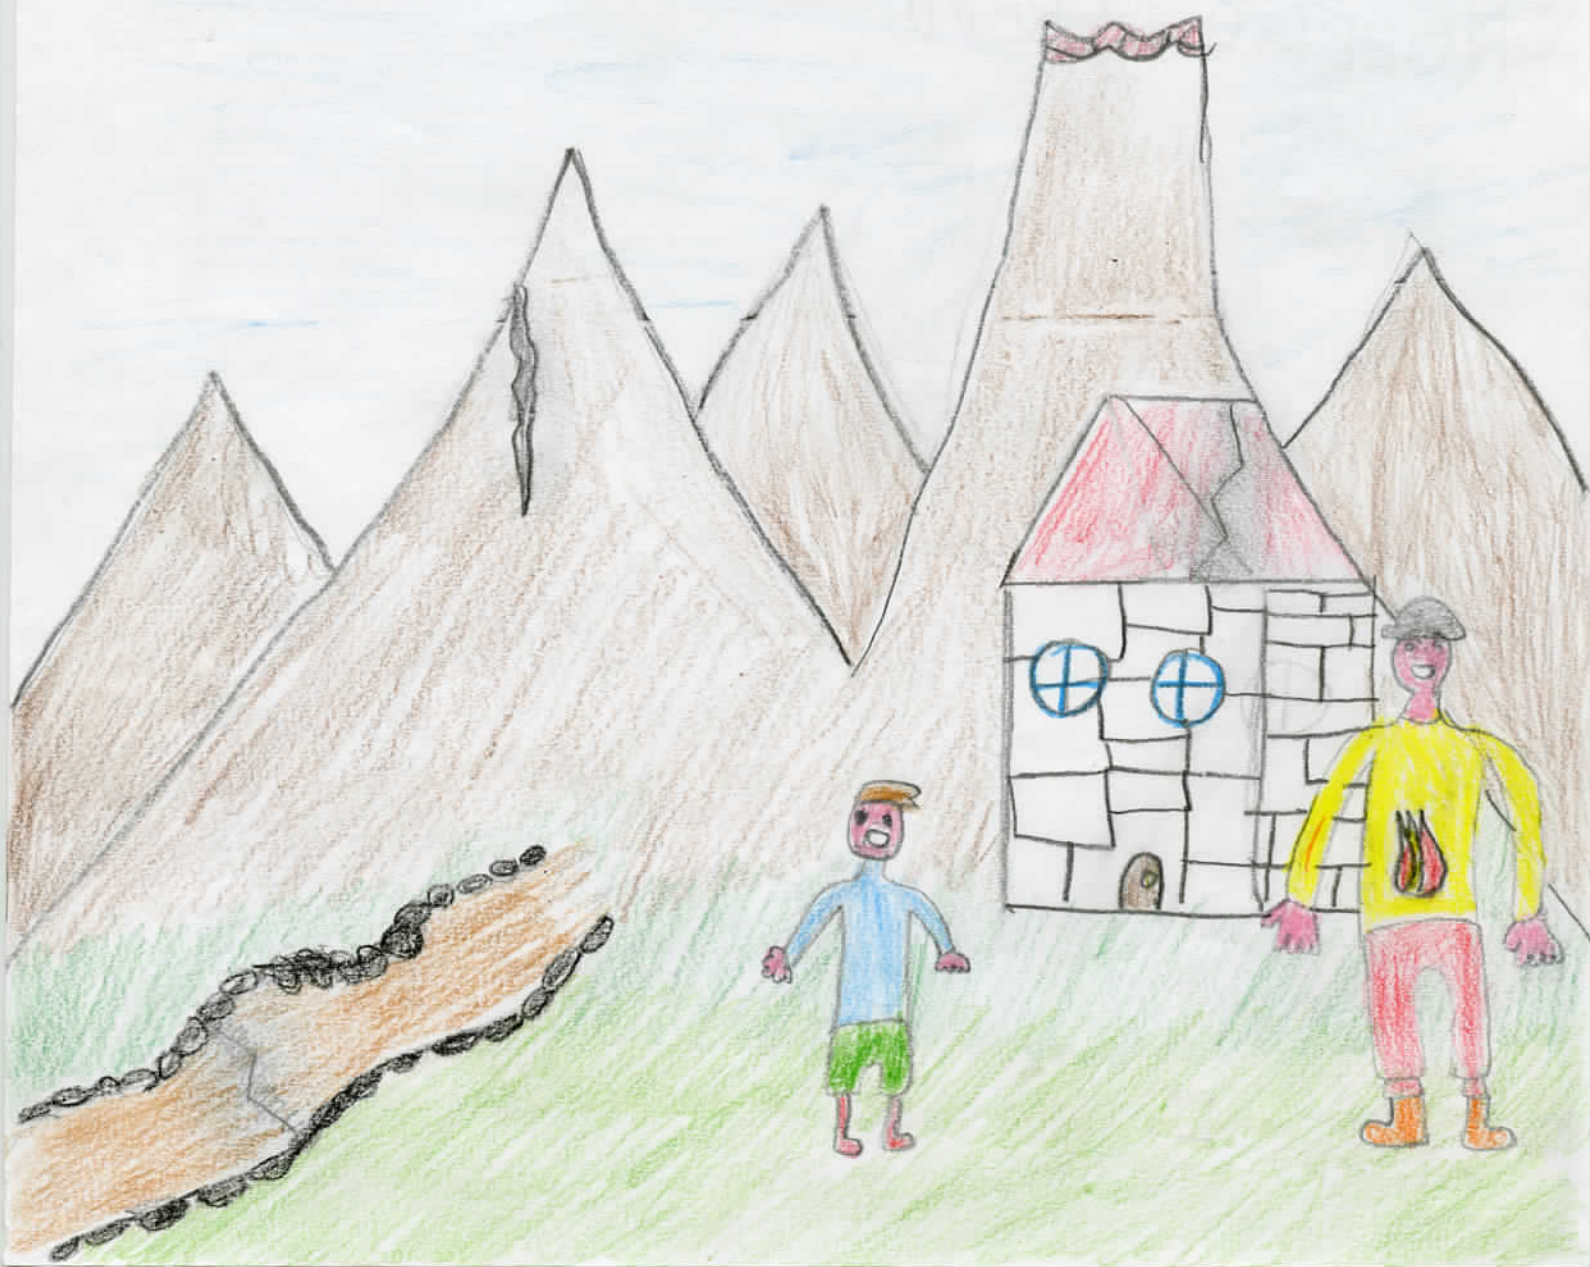

La fine di tutto! Il vulcano ha smesso di eruttare  
però l'ambiente è pieno di macerie e pietre  
infuocate. I pompieri hanno calmato Eugenio e  
raccolto le macerie.



## **Supplement 2 - Frame 1 - The story's setting**

Selected examples of the stories' first frame, describing the story's setting.

Drawings were realized by the pupils of primary and secondary schools listed in Table 1. The schools' enrolment into the project was discussed by schools' board and then presented to the families at the beginning of the school year, as a part of the school curriculum (Piano Triennale di Offerta Formativa). We did not collect any personal information about the participating students who always worked in pairs or small groups. Students were explicitly asked not to print their full names on their compositions. The production of text and drawings was not compulsory and students were free to decide the degree of their involvement in the exercise. The stories we collected were freely donated to be used for research purposes such as the present manuscript. Originals are kept into the Edurisk archives.

The supplement is provided as a portfolio, with examples of the collected materials.

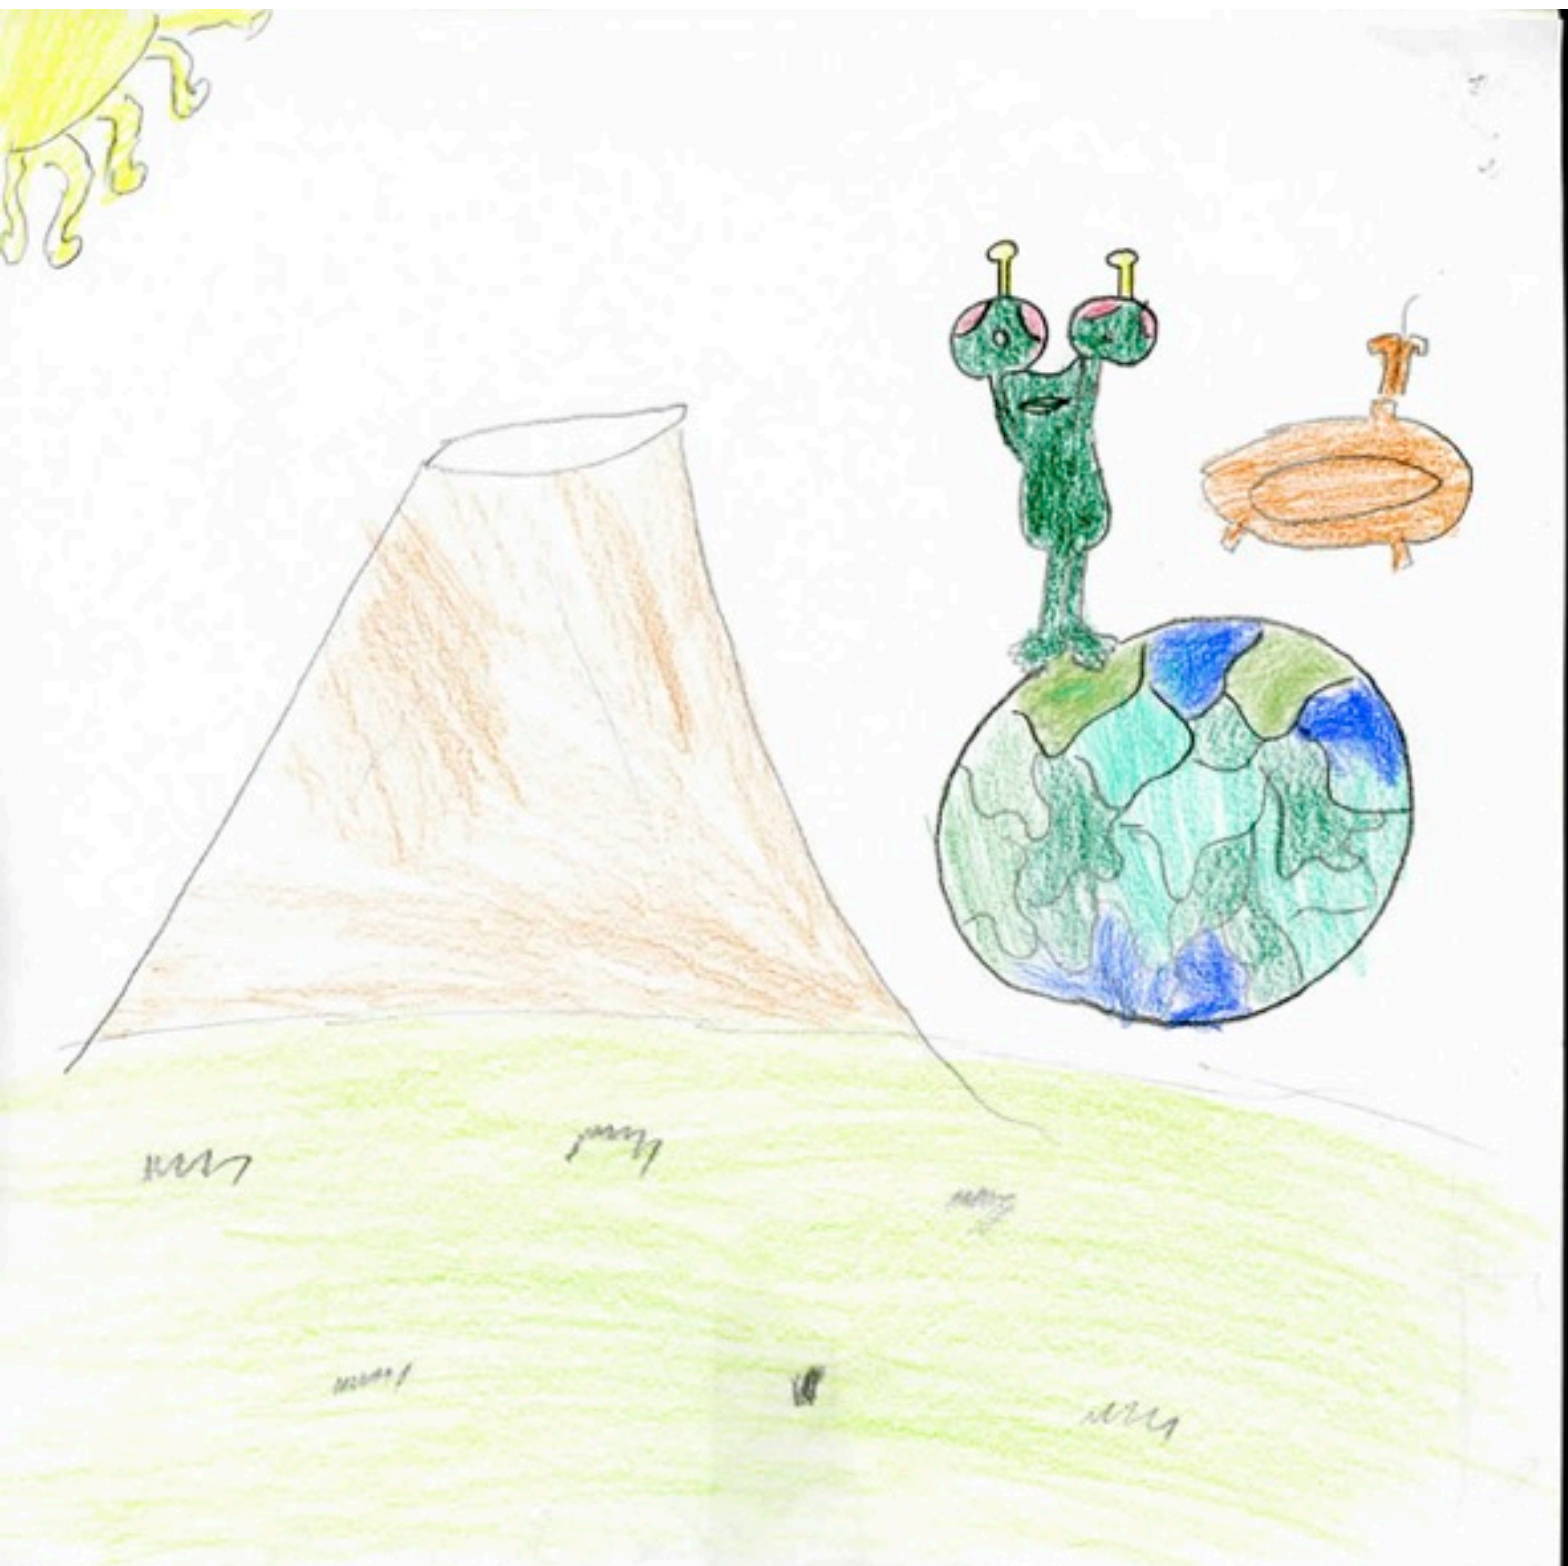

C'era una volta un alieno che viaggiava in tutte le zone del mondo.  
Un giorno si trovò vicino a un vulcano e non riuscì a capire  
che cosa era.



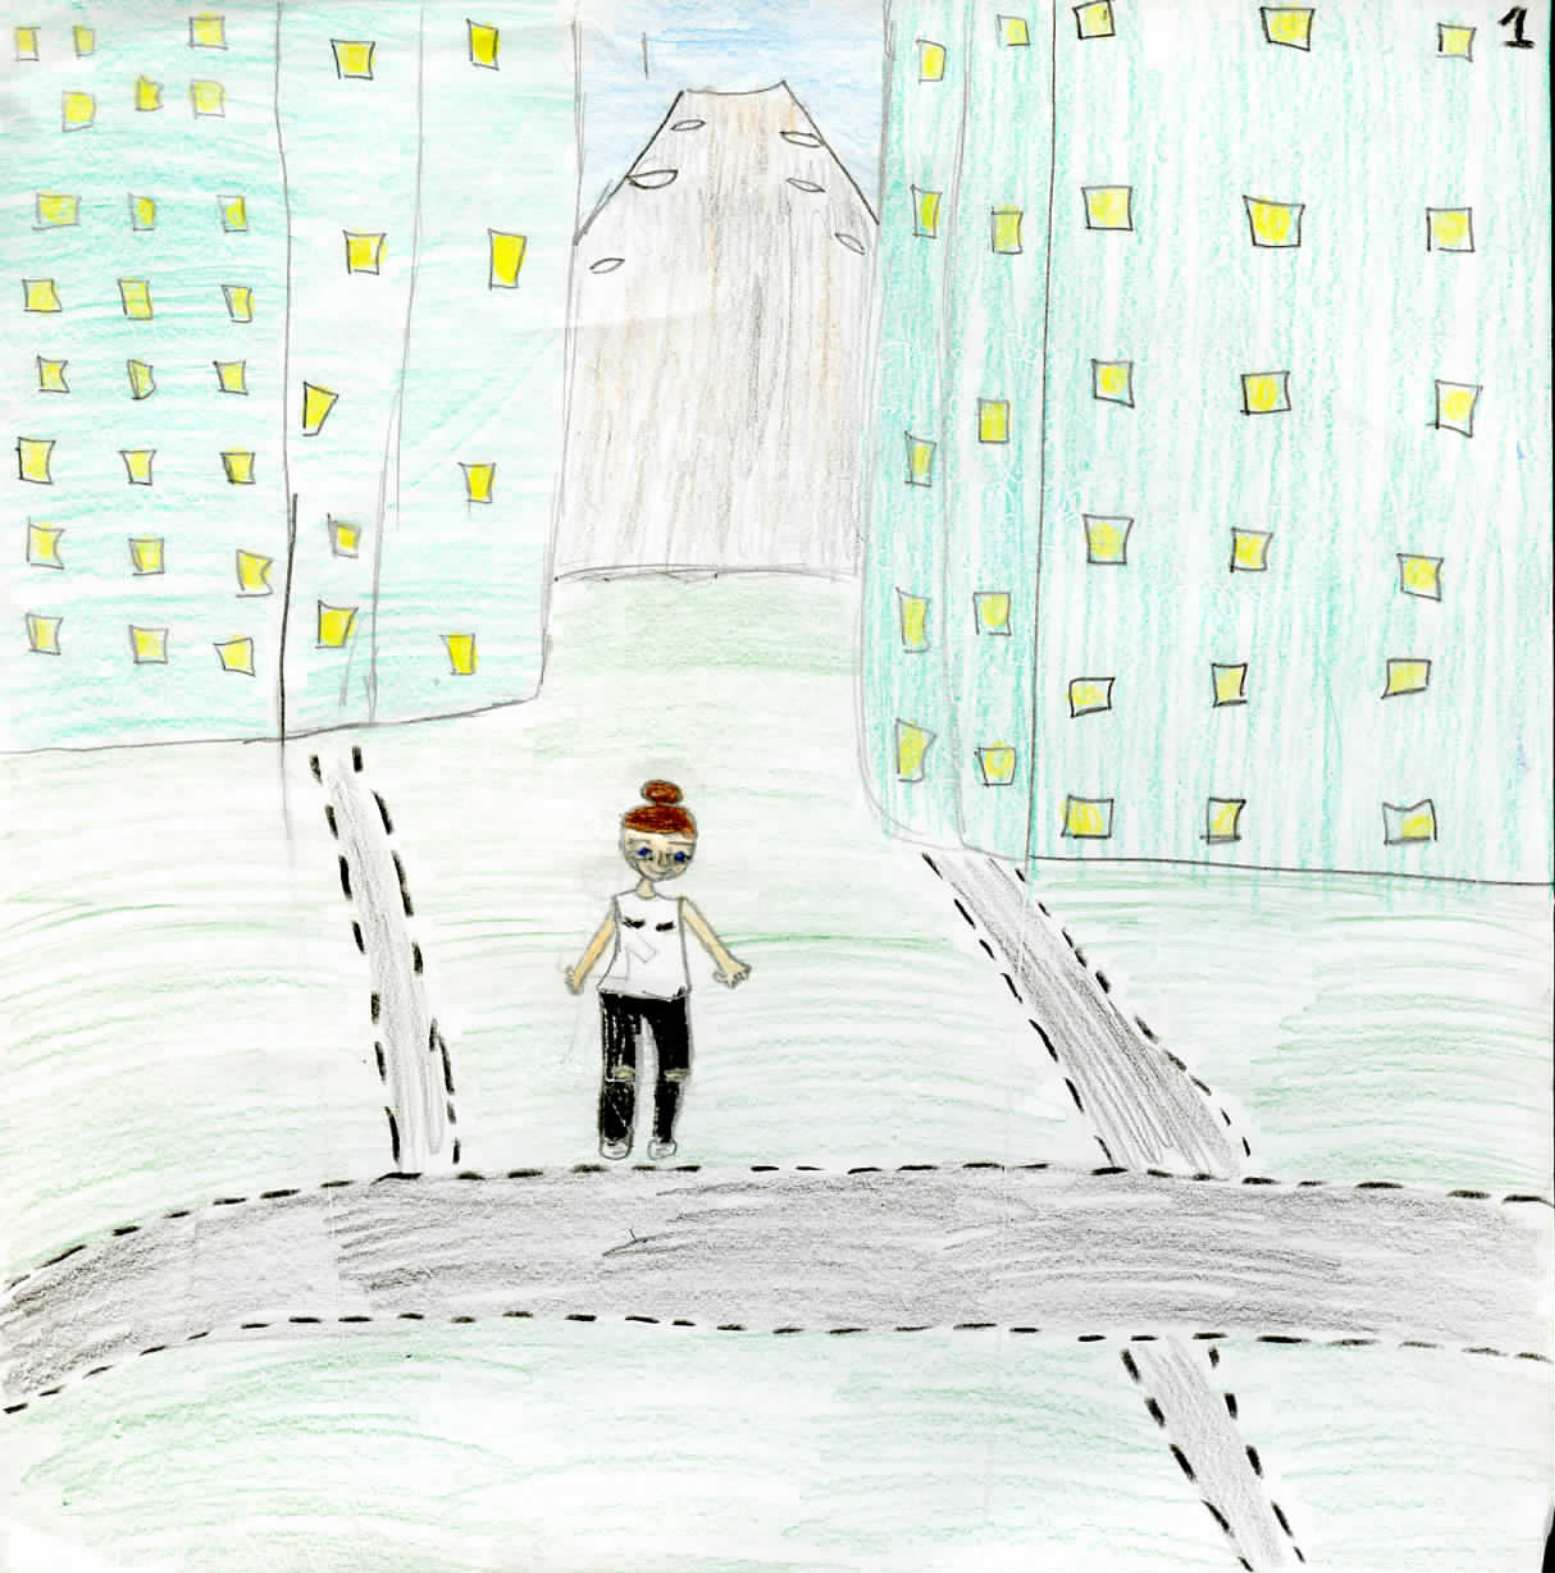

Questo ragazzo di nome Andrea, vive in Sicilia e sta assistendo ad una cosa inaspettata. Andrea precisamente si trovava in città a due passi dall'Etna.



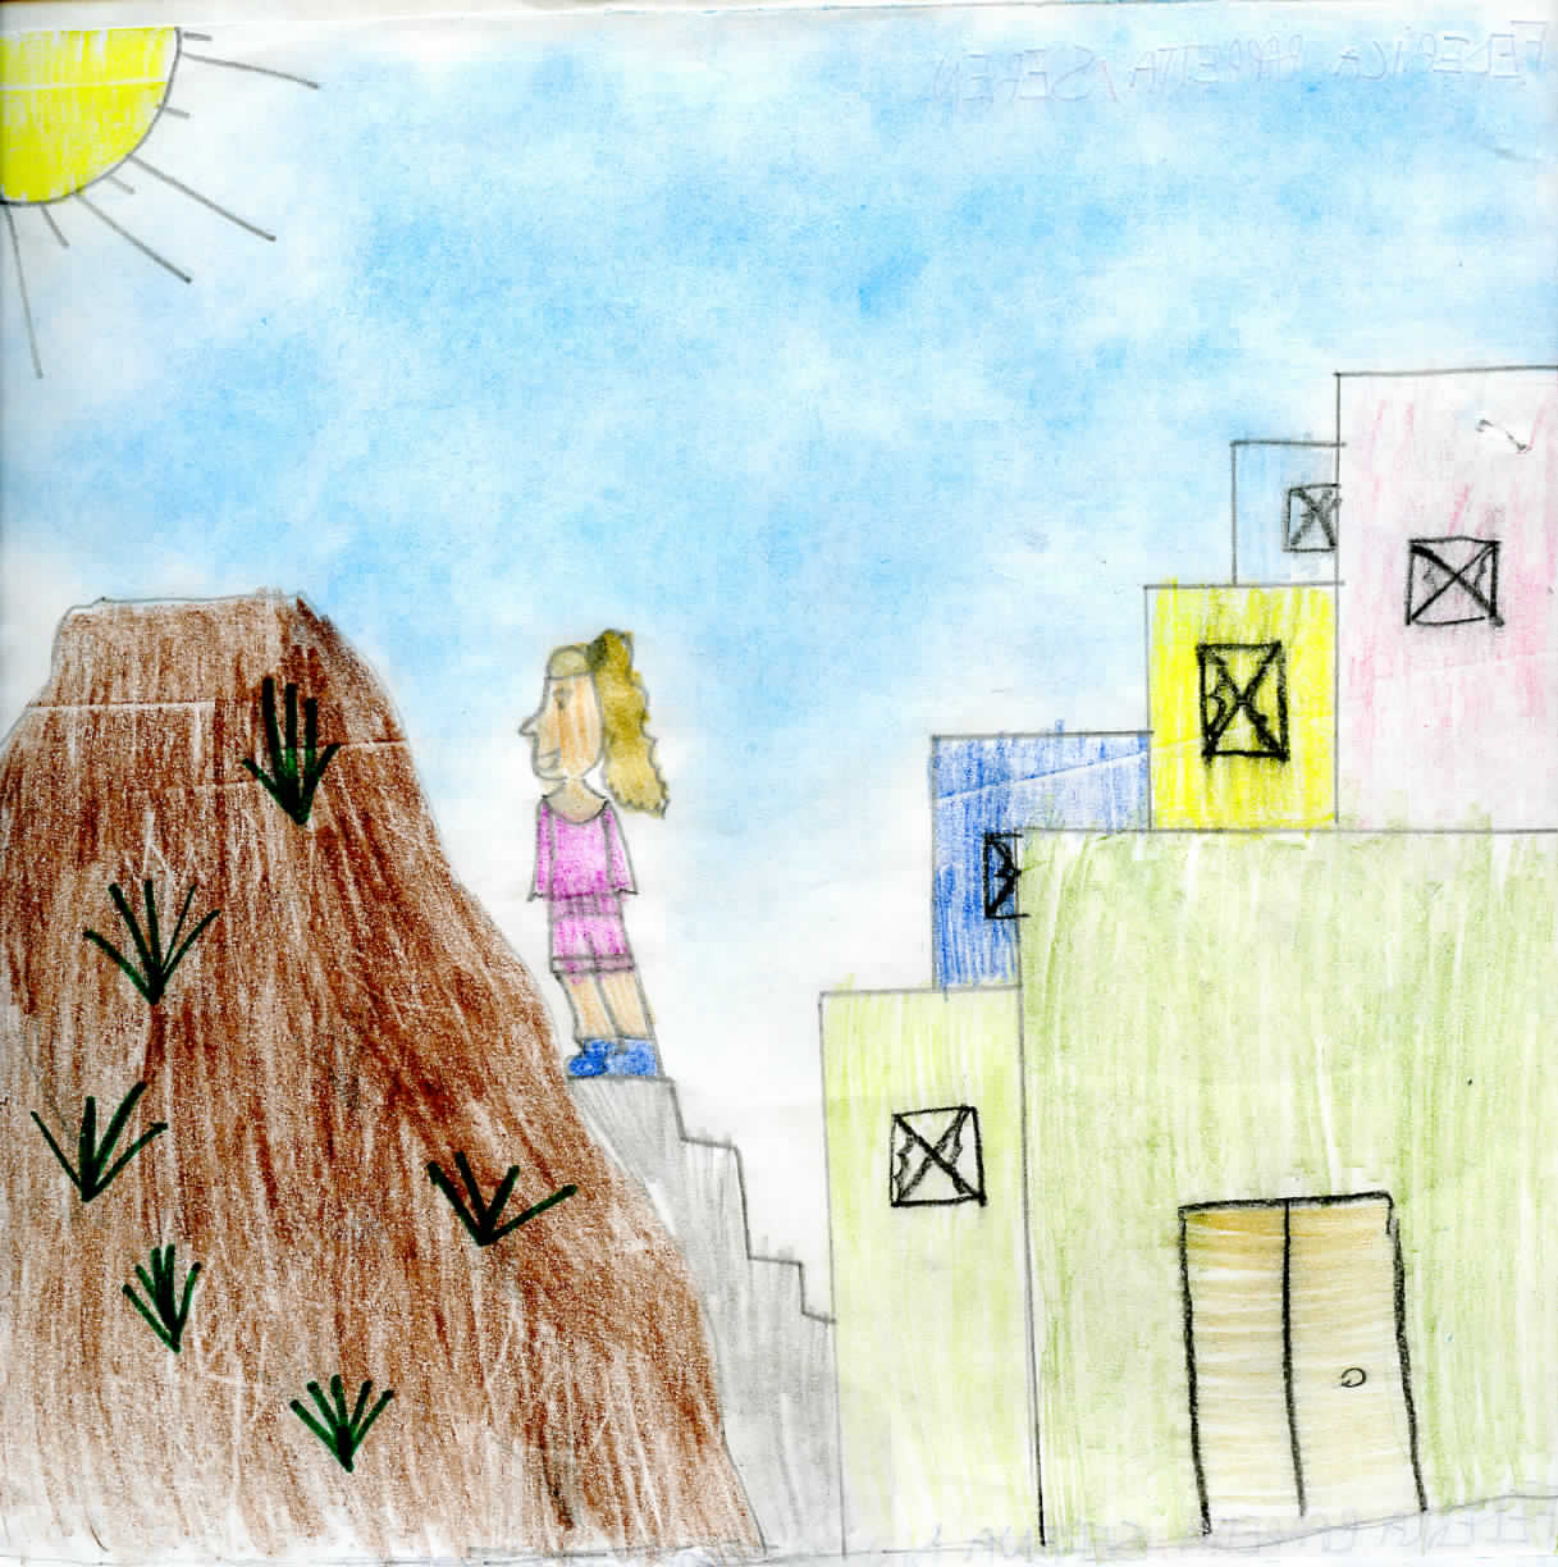

~~ALTICE~~ ALTICE VIVÉ A NAPOLI HA 13 ANNI. UN GIORNO ANDO' A VEDERE IL  
VESUVIO, UN VOLCANO LA SUA BELLEZZA ERA INFINITA E ALTICE DECISE DI  
SALIRE AD UN TRATTO ENTRO' DENTRO IL VESUVIO E NON C'ERA LA  
IL CIO' ERA STRANO E ALTICE INIZIO' A PREOCCUPARSI.



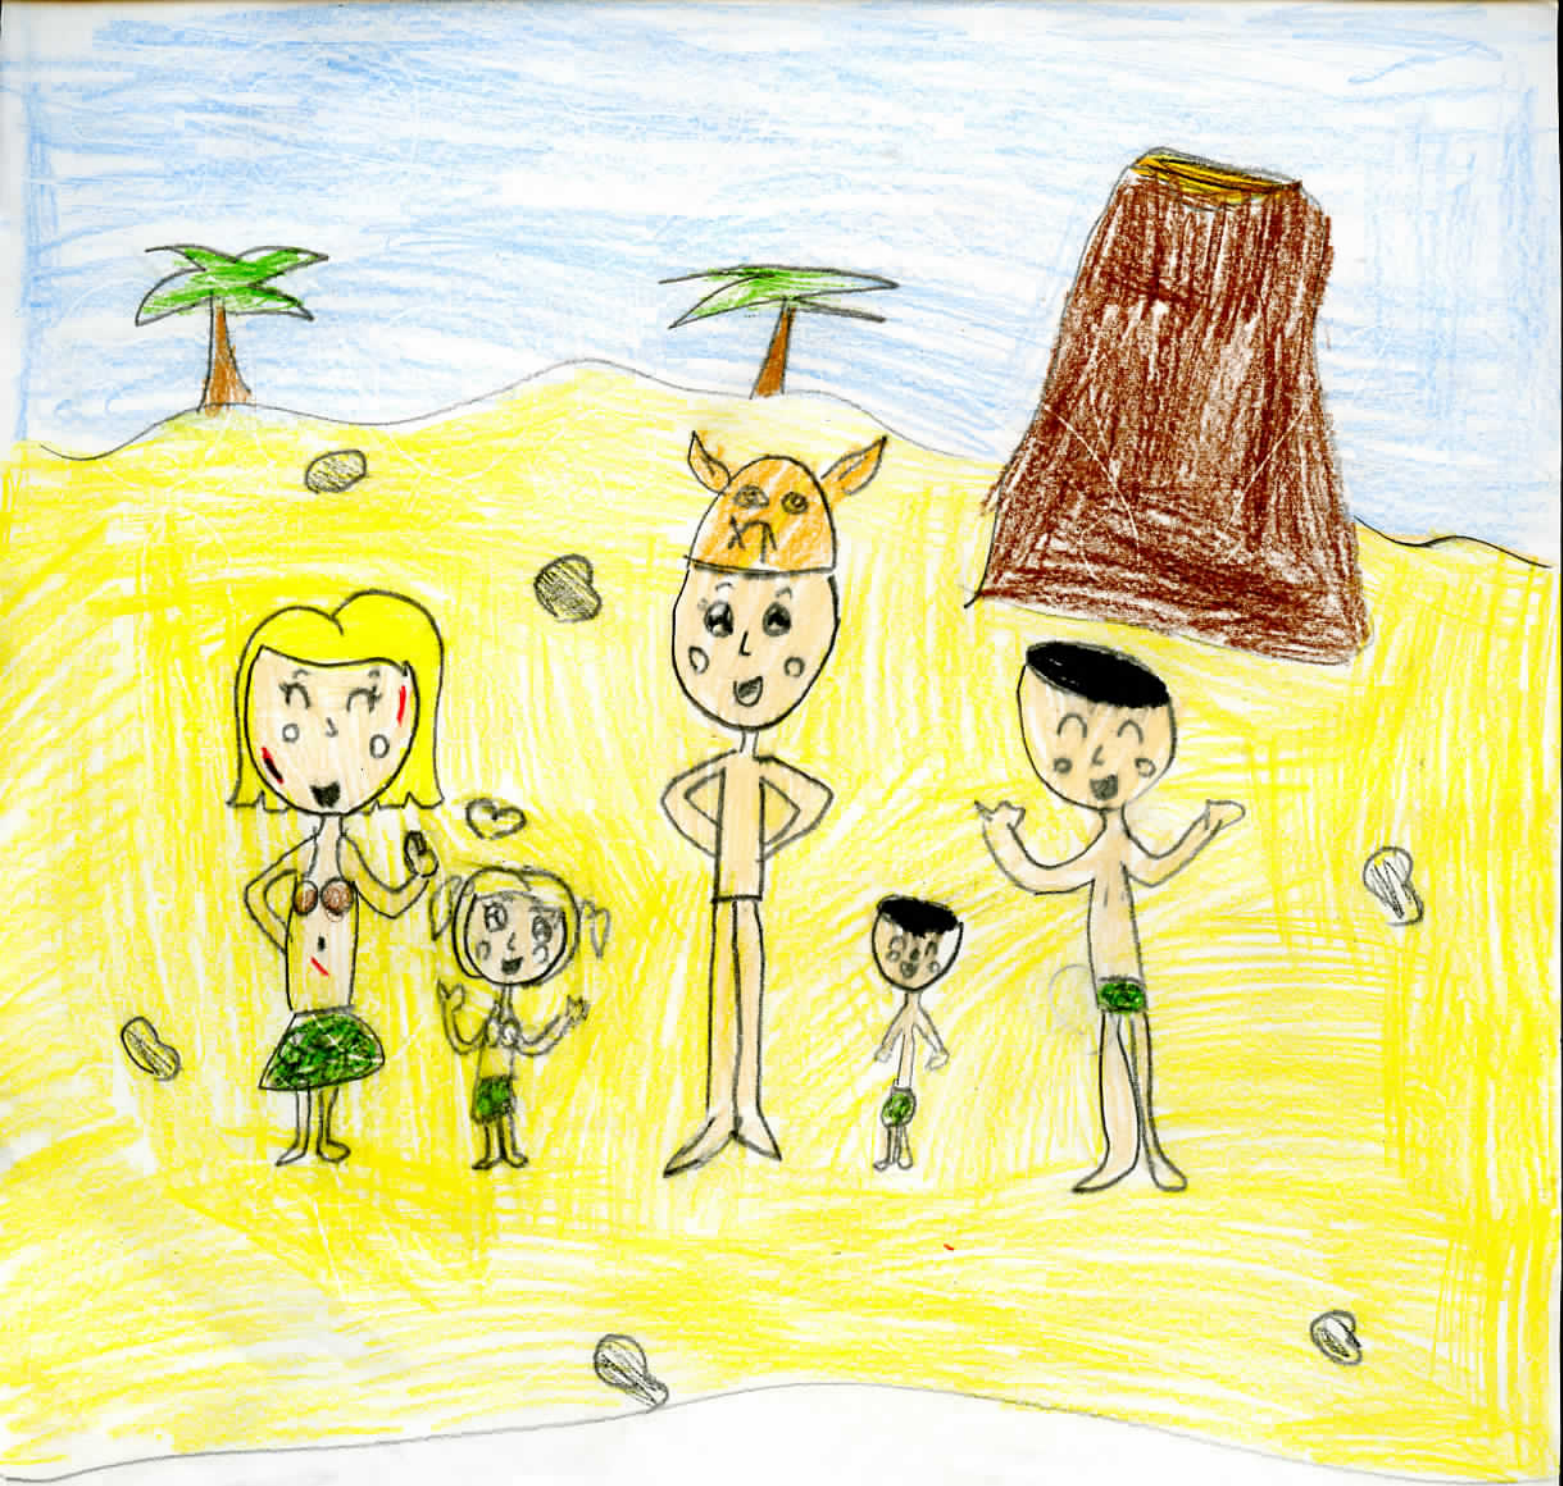

l'era una volta dei fratellino stavano  
dormendo e hanno sentito un rumore e si  
sono svegliati e hanno visto il fumo e ando  
a svegliare i loro genitore e dicono andiamo  
in un'altra parte dai suoi nonni



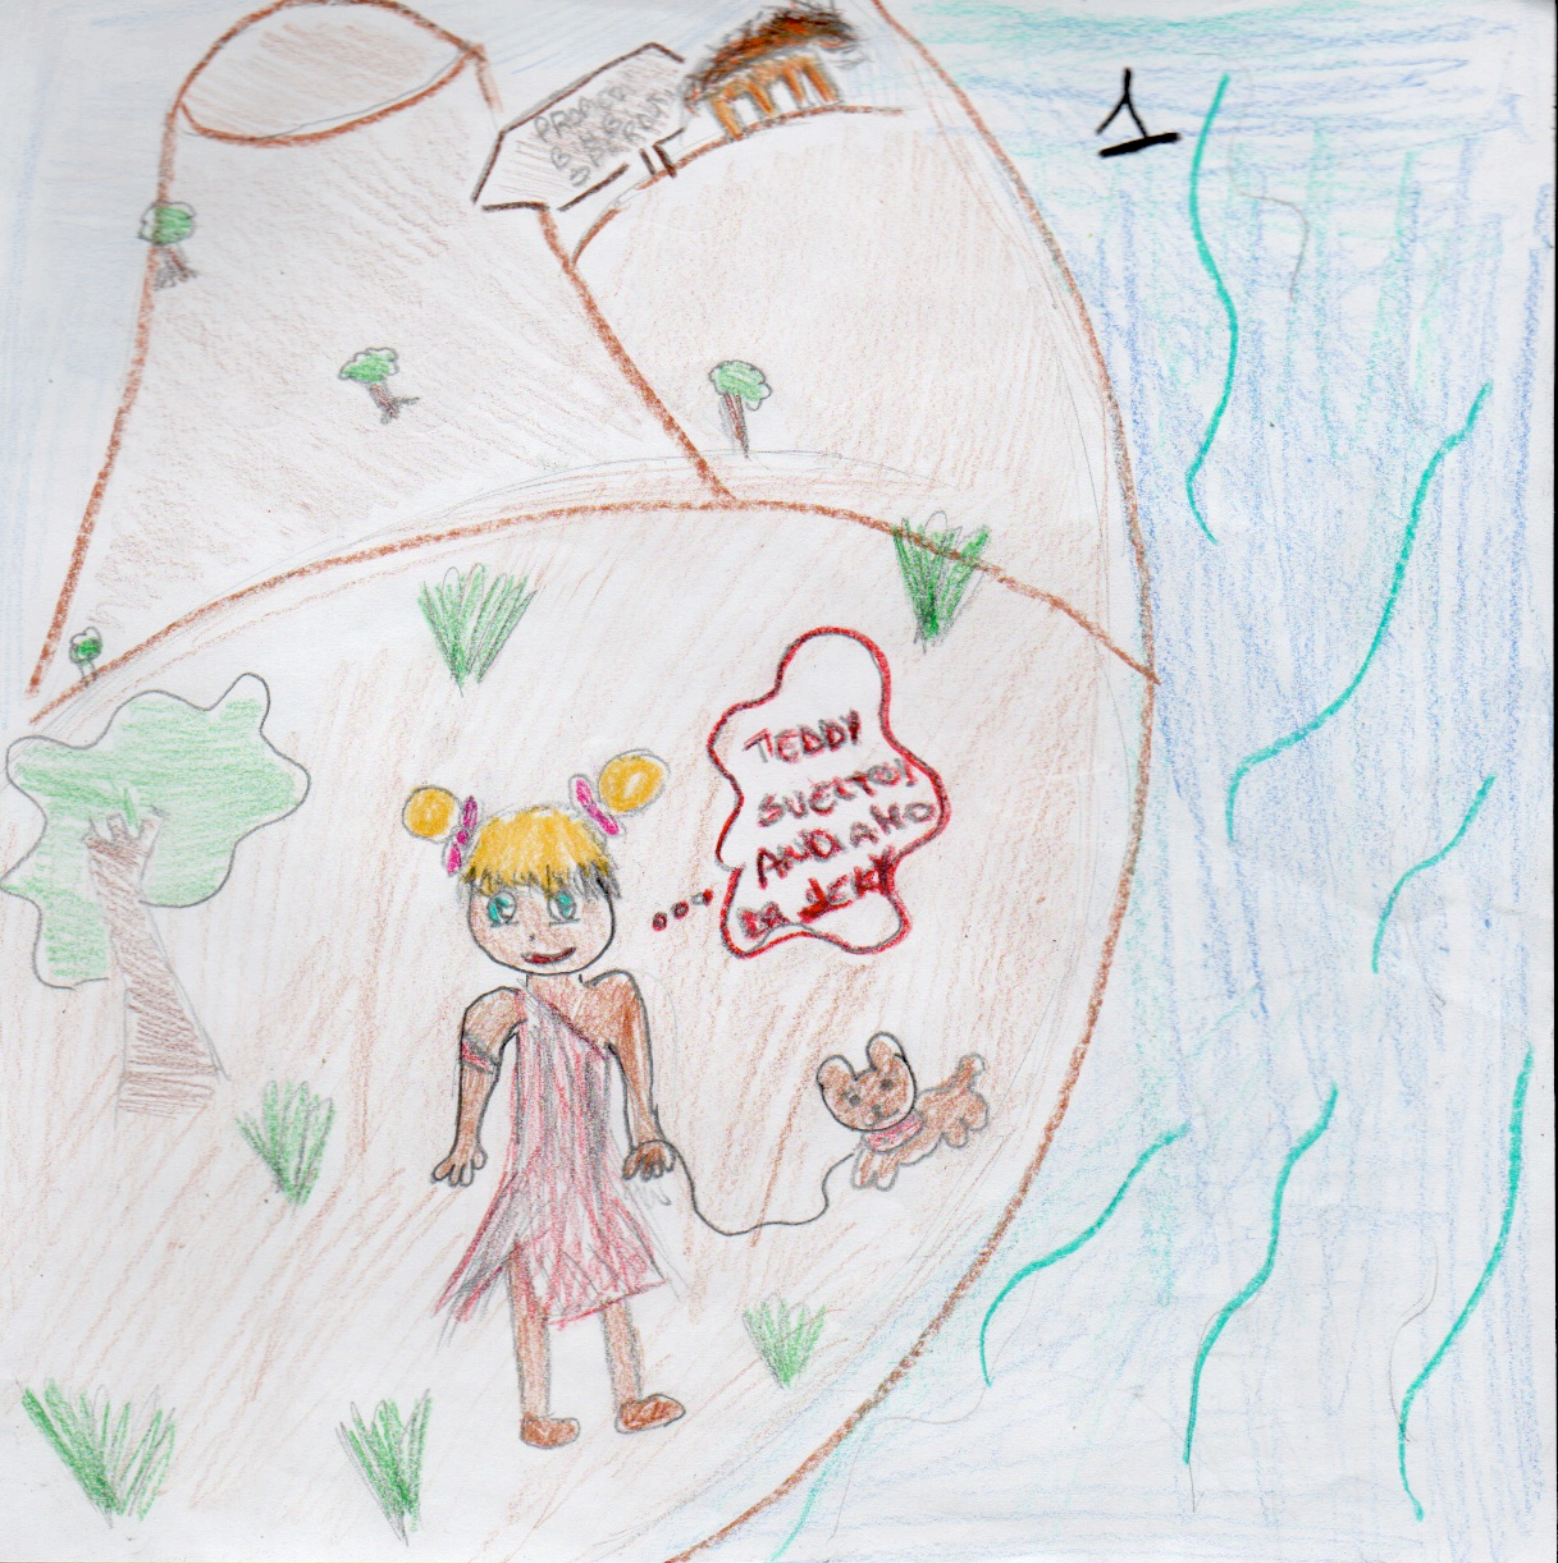

C'ERA UNA VOLTA SU UN' ISOLA DESERTA UNA BAMBINA DI  
NOME MOLLY CHE VIVEVA NEI PARAGGI DI UN VULCANO CON IL SUO  
ORSETTO DI NOME TEDDY. ALLOGGIAVA IN UNA CAPANNA INSIEME  
A DEI BAMBINI SPERDUTI.



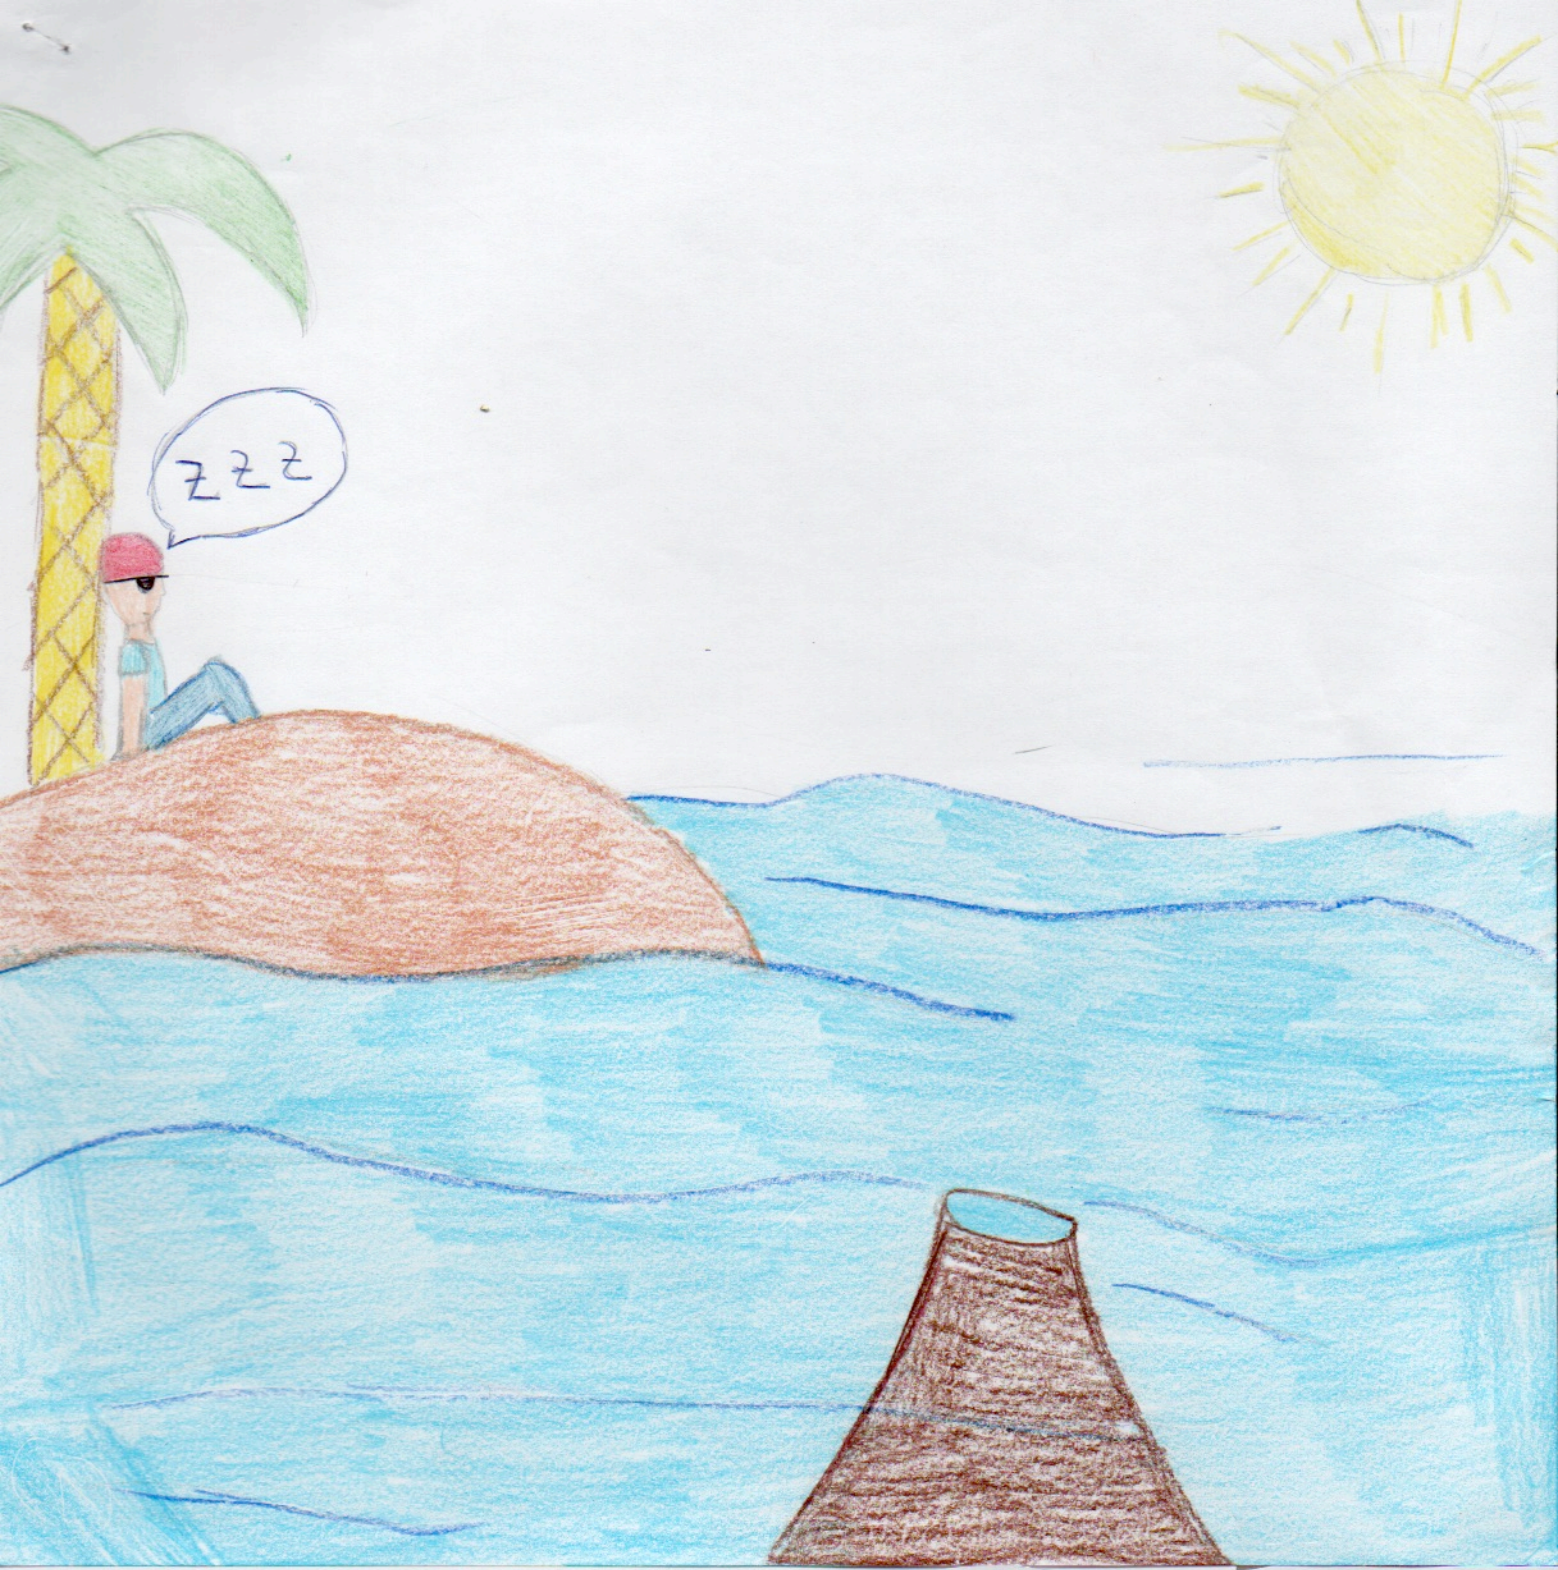

Jack il pirata vive su un' isola, un mezzo al mare, accanto ad un  
vulcano.



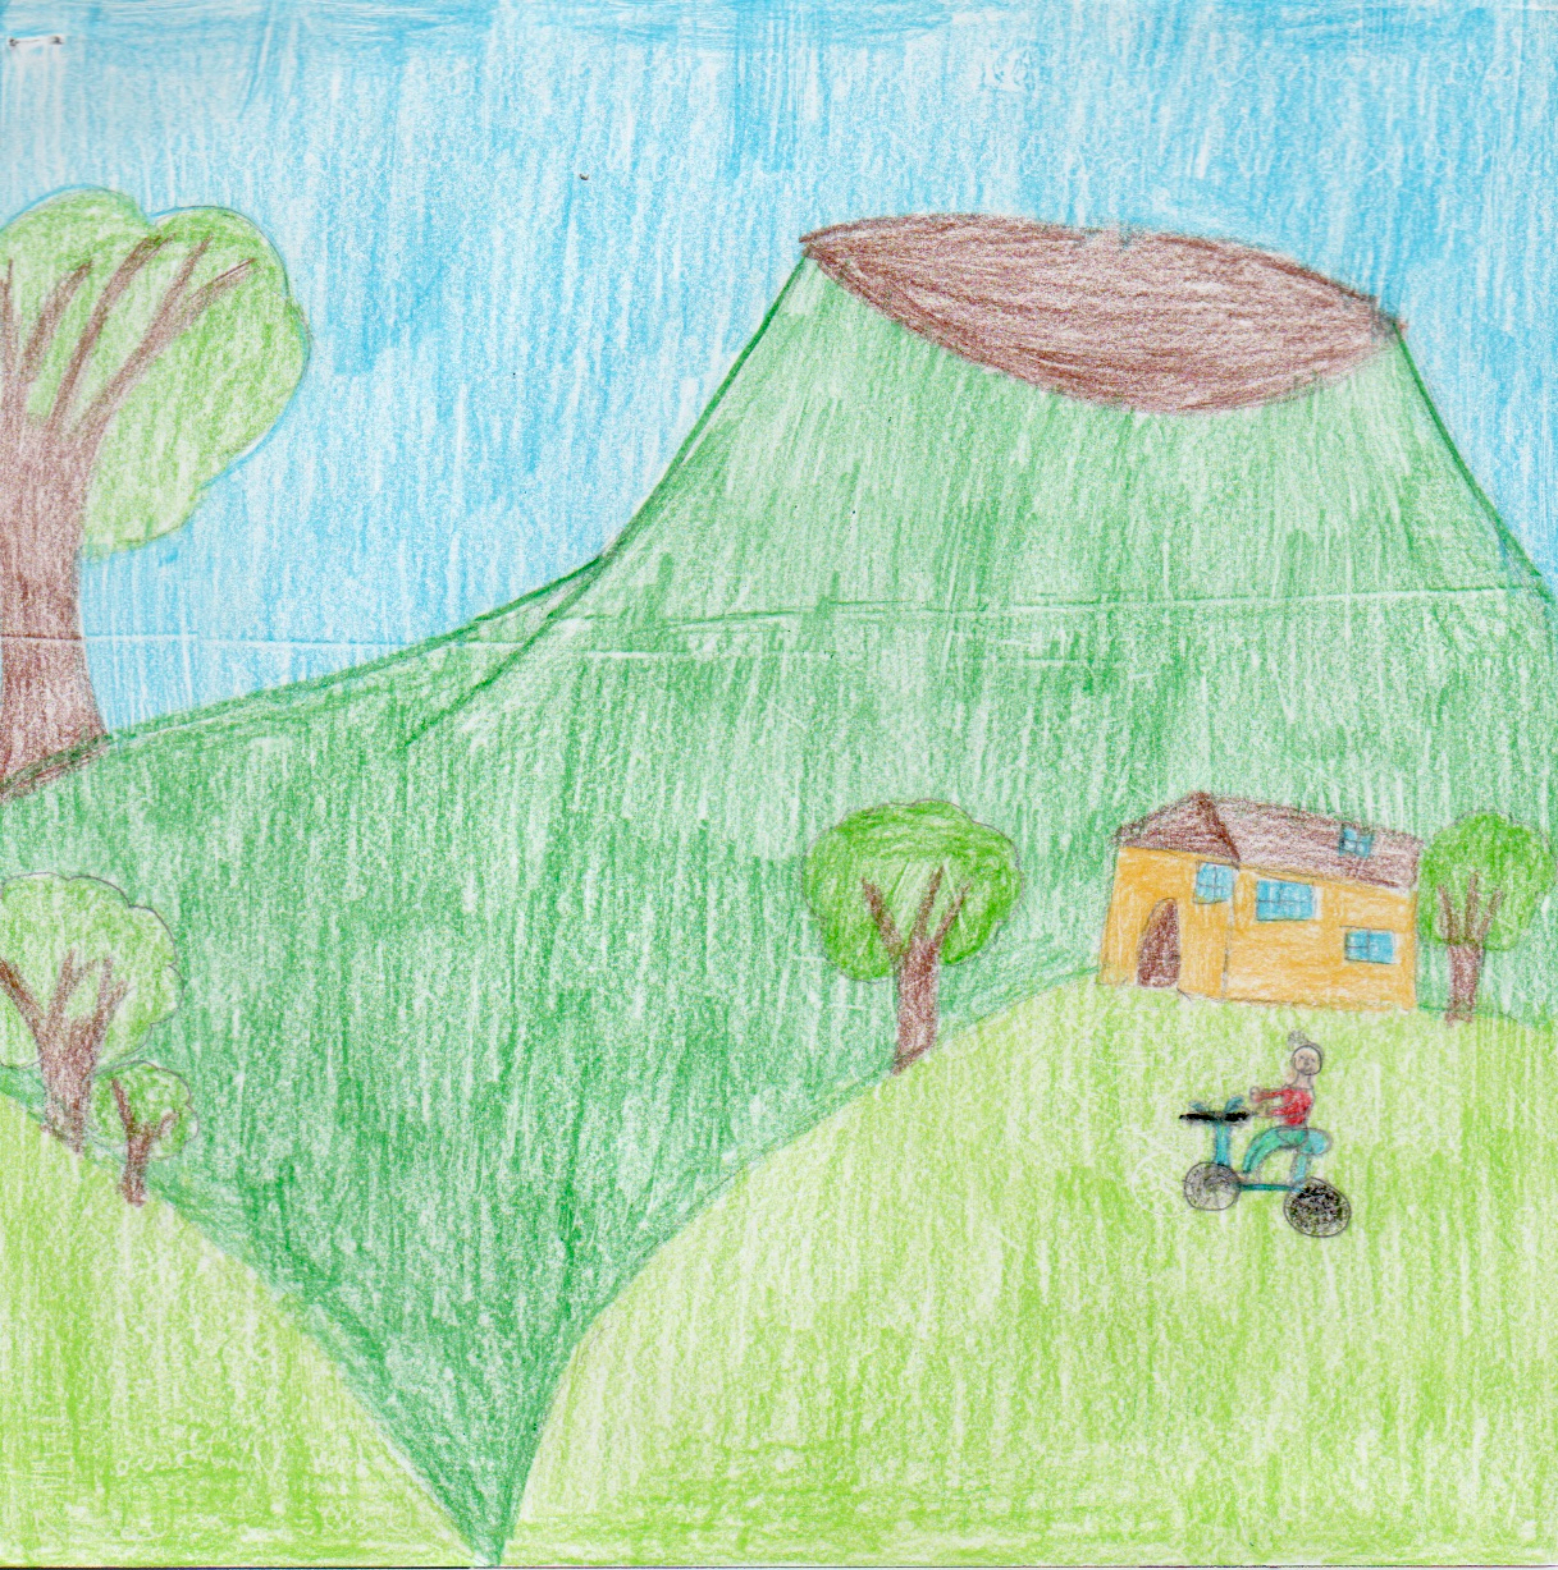

In questa immagine è rappresentata la casa di Alessandro che si trova su una collina, sotto un vulcano; lui è sulla bici



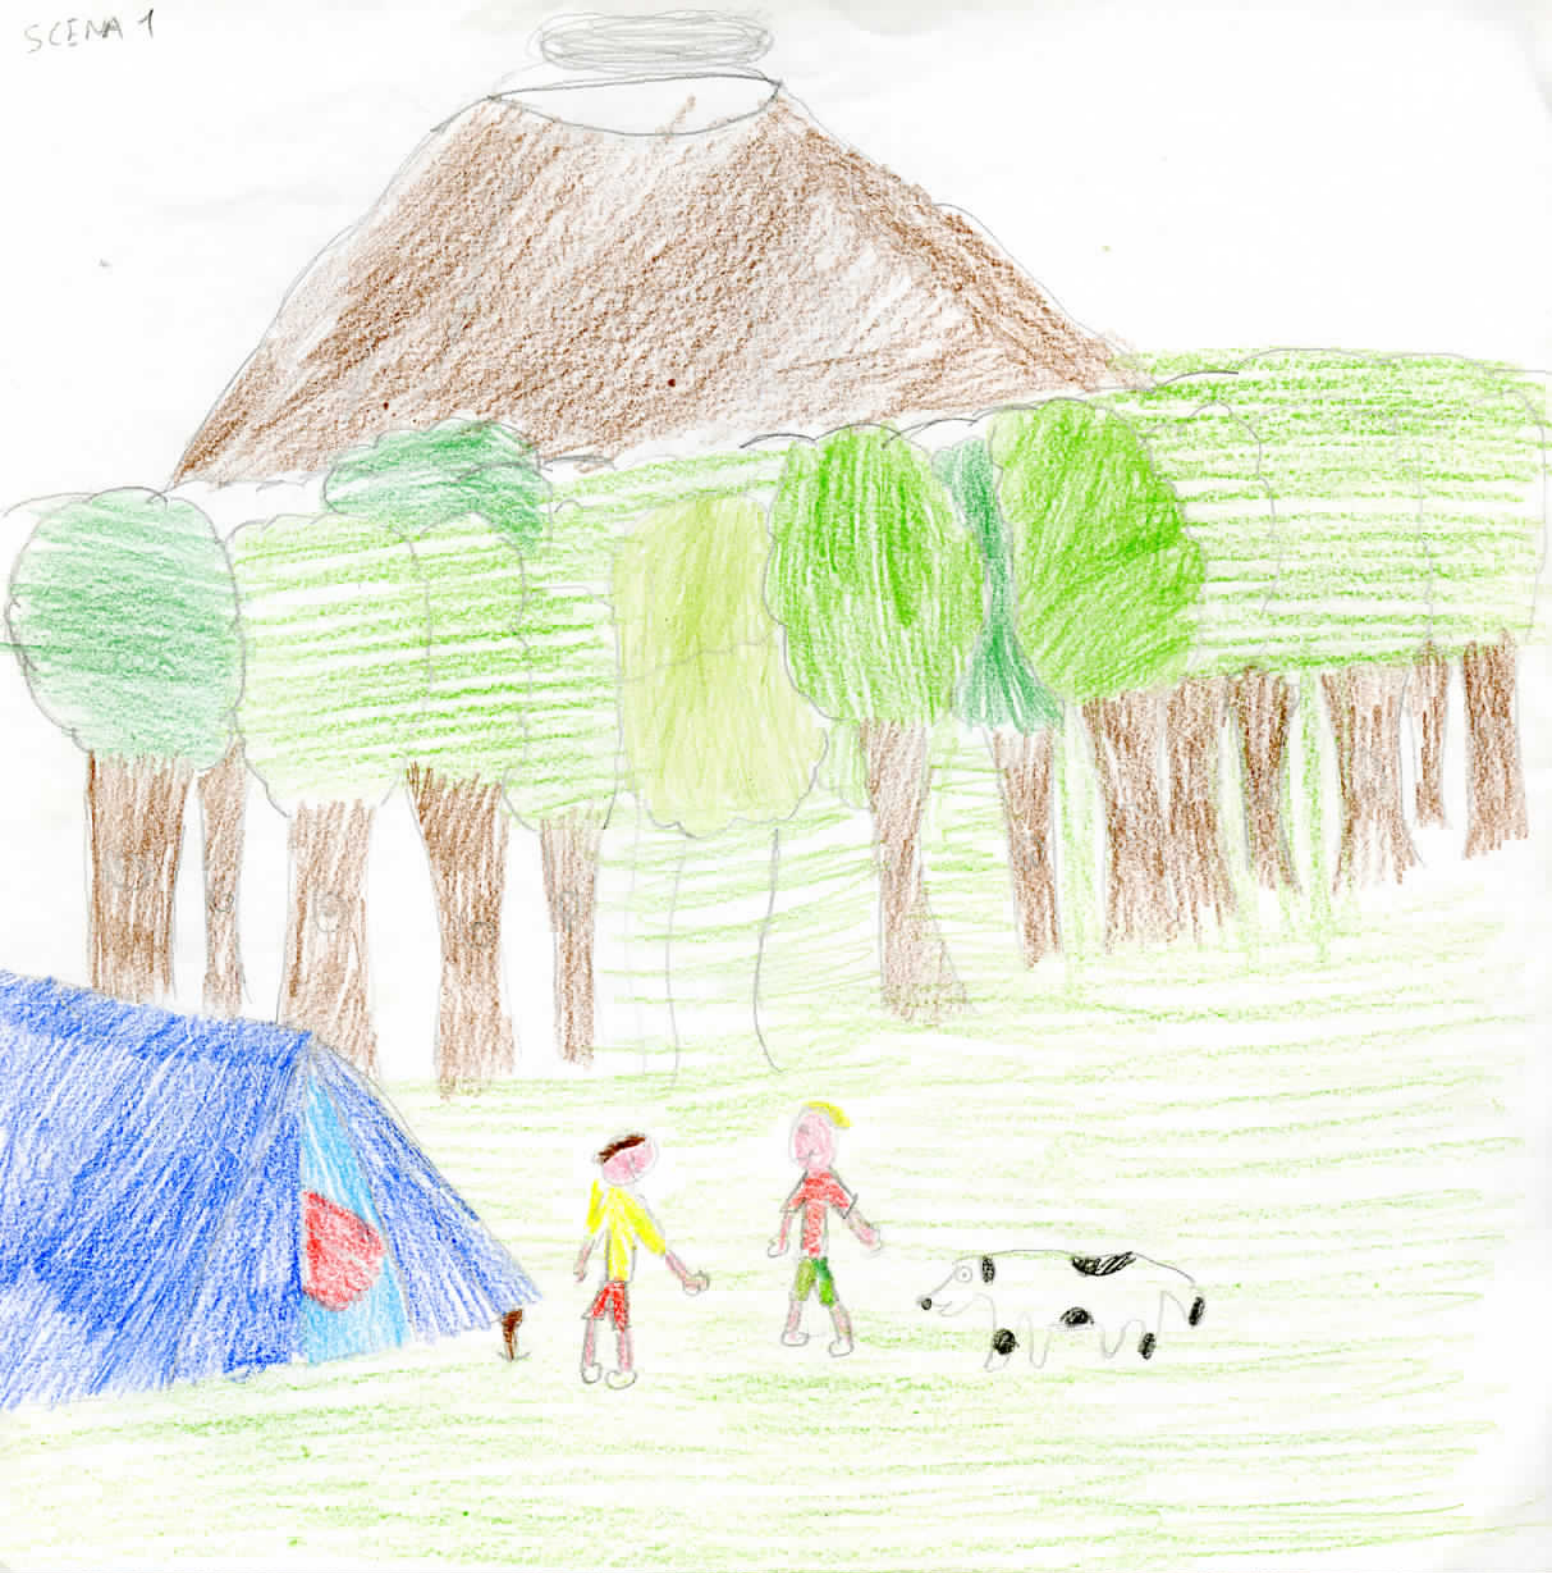

SCENA 1  
DUE AMICI SI TROVANO IN UNA FORESTA INSIEME AL LORO  
CANE ACCAMPATI IN UNA TENDA, TRA GLI ALBERI RIESCONO A SCORGERE  
UN VULCANO GRANDISSIMO ~~TRA GLI ALBERI~~

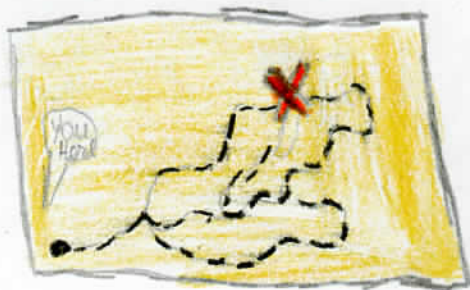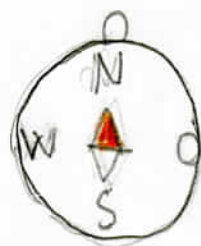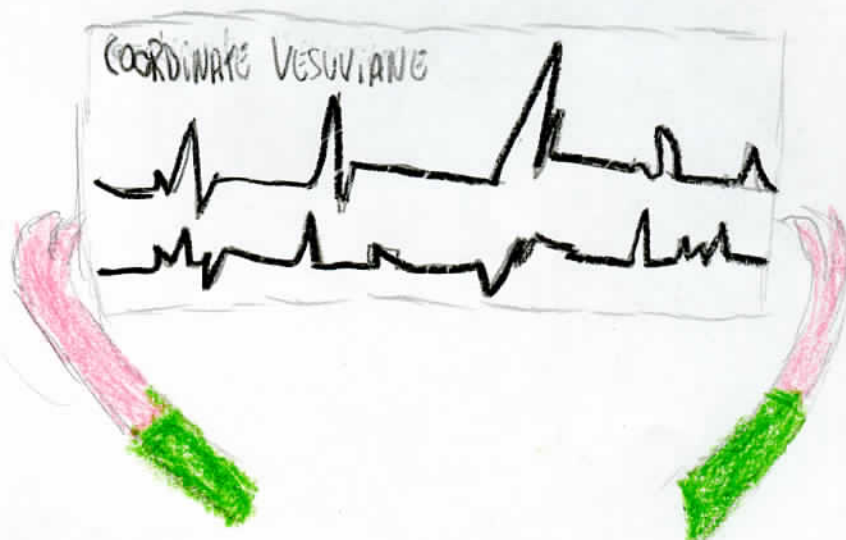

Brian va ad Eucolono per visitare il Vesuvio per farci una  
 ricerca sulla sua esplosione <sup>con le sue</sup> coordinate dello scisma del terremoto



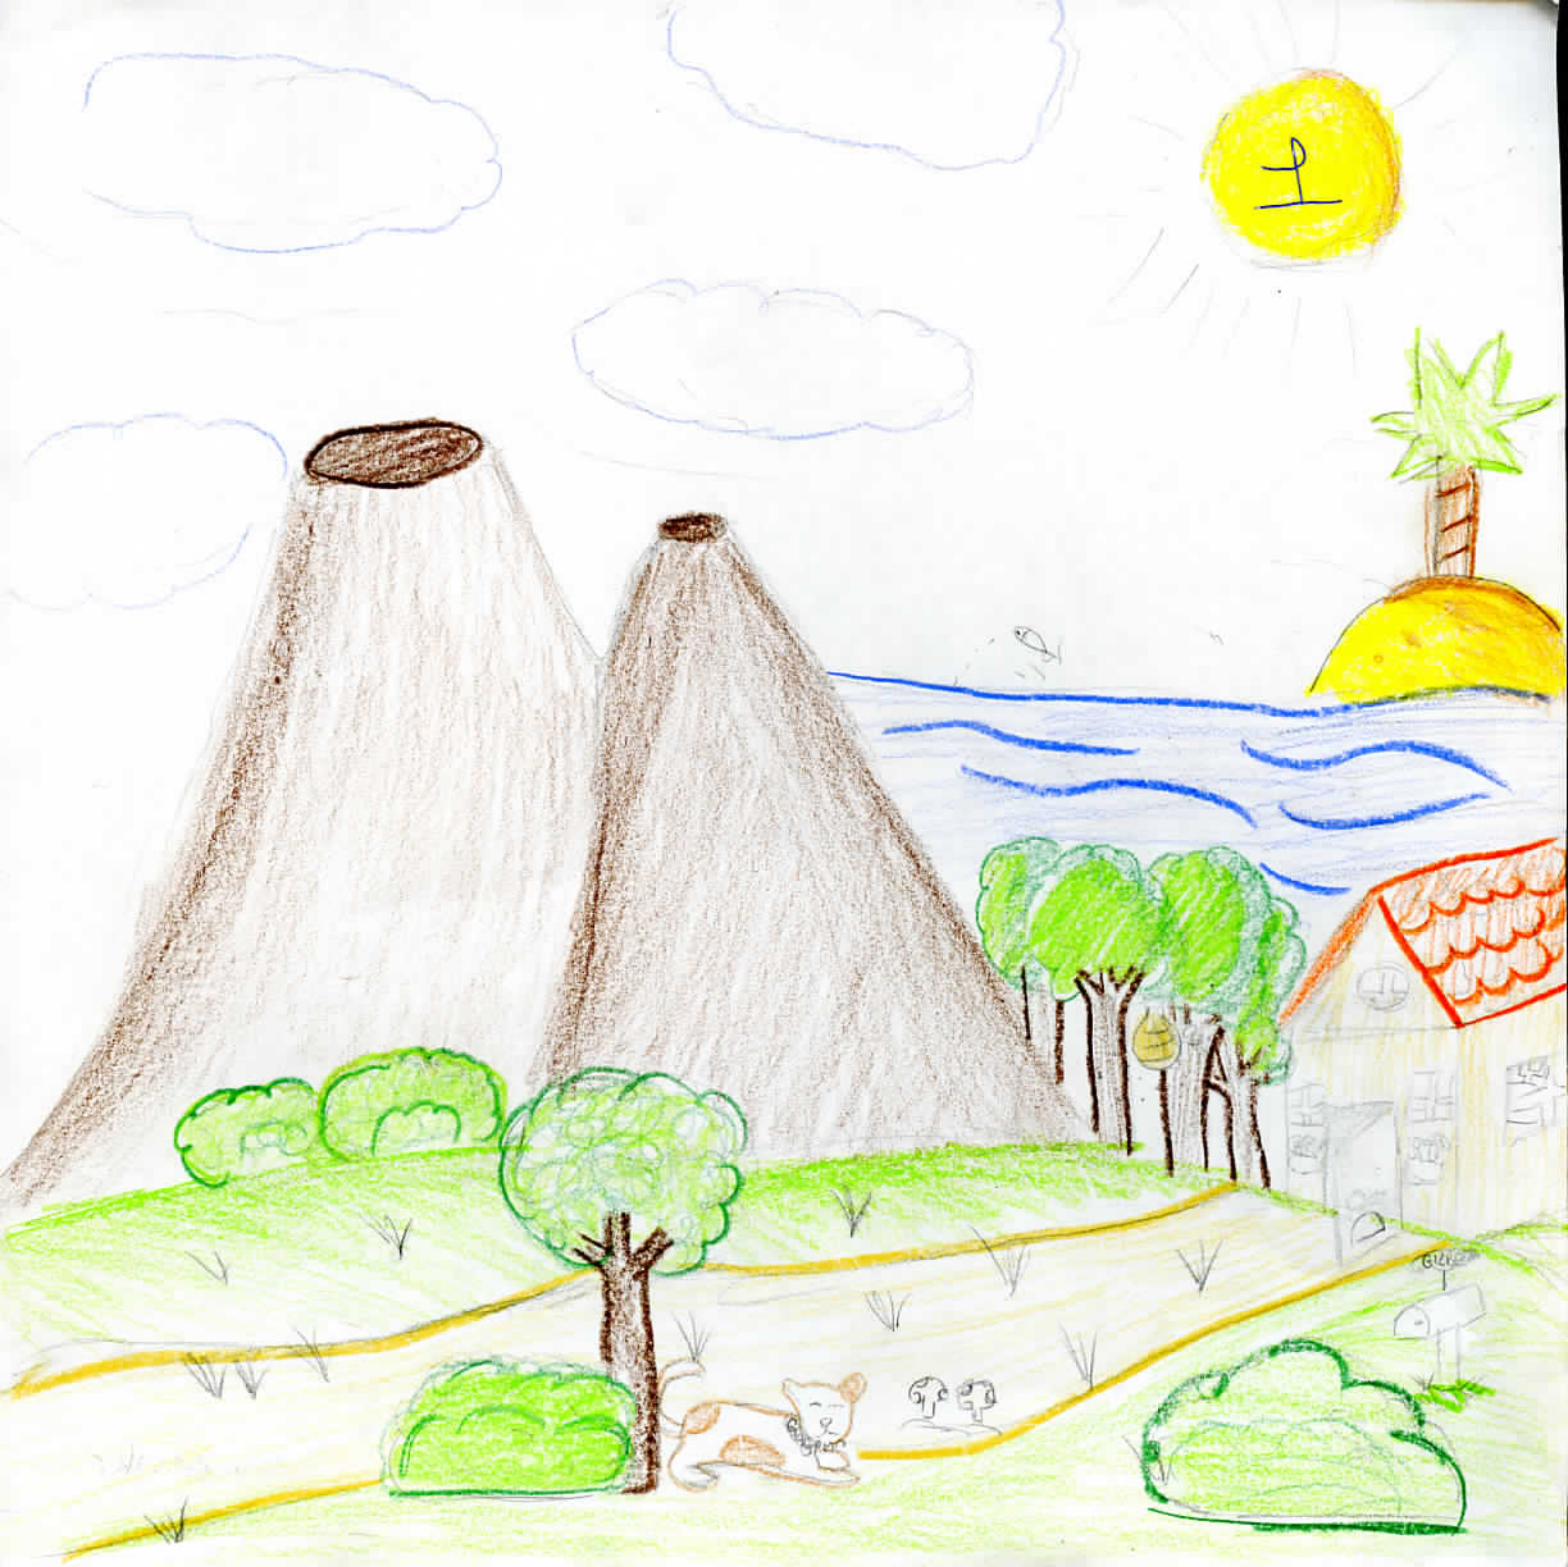

C'era una volta un ragazzo di nome ±  
Gilberto che viveva tutto solo con il suo cane  
Giacomo in una piccola casetta vicino al Vesuvio e  
al mare ...

1

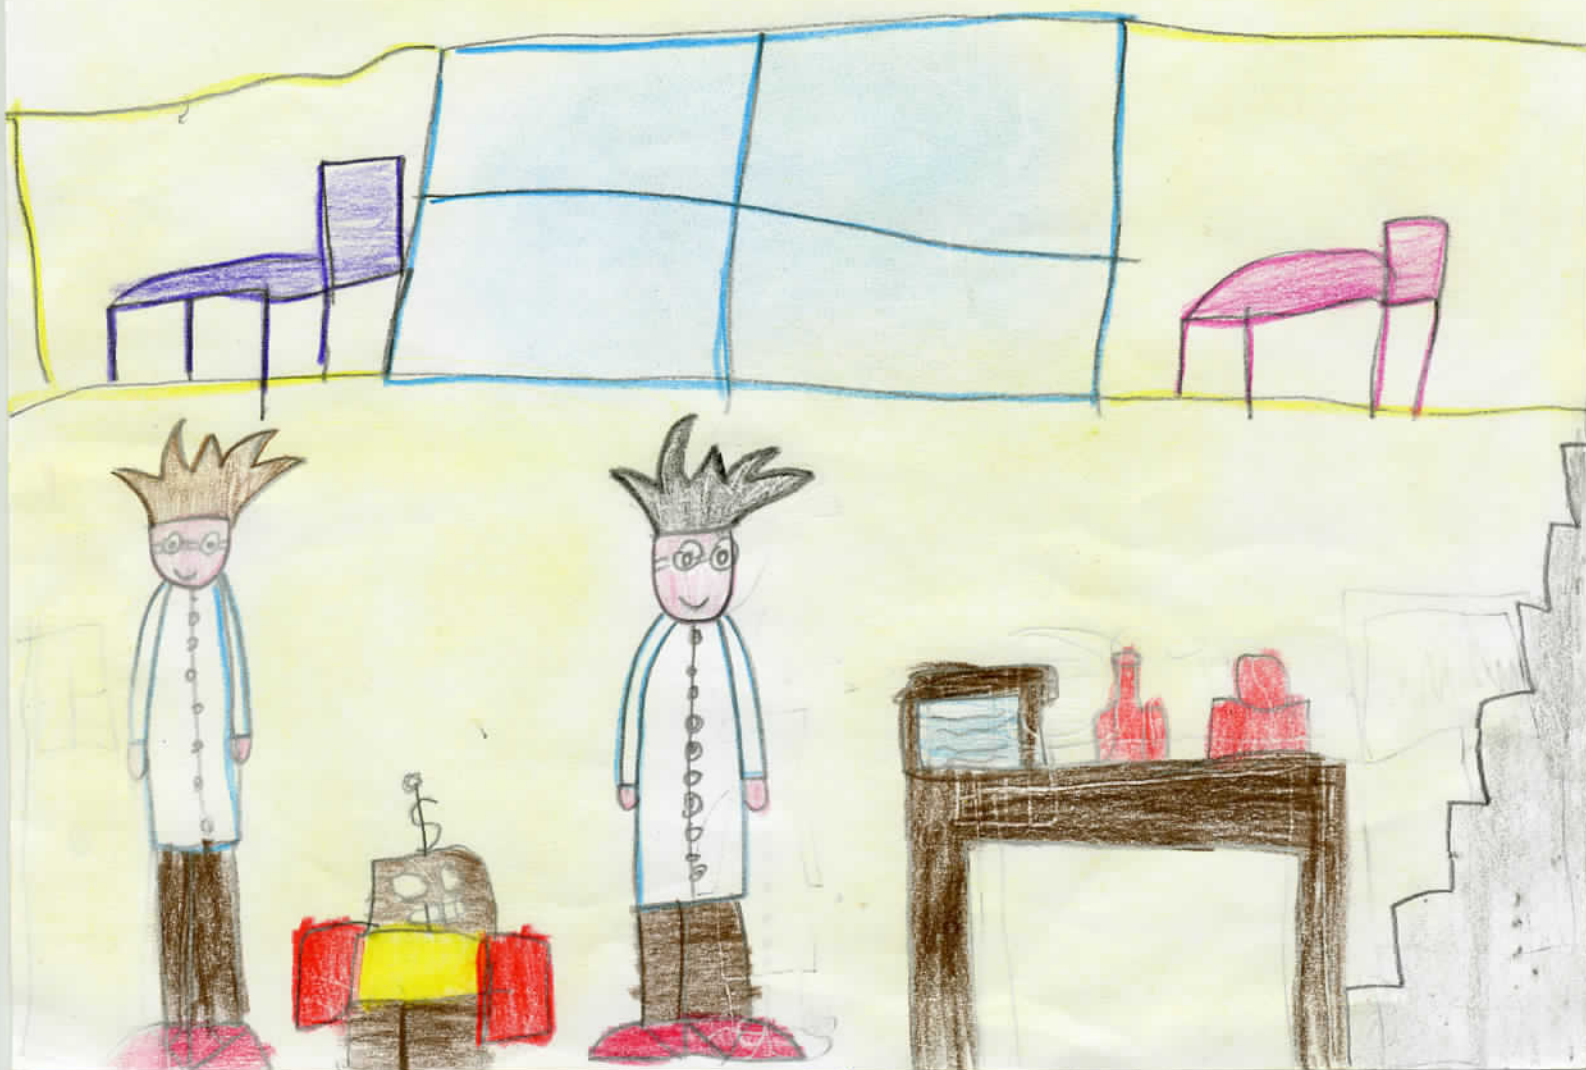

Un giorno lo scienziato Alberto decise di vivere in montagna perché voleva studiare i vulcani tra i quali l'Etna, e questo grande vulcano chiamato Etna voleva studiarlo insieme ad altri scienziati.



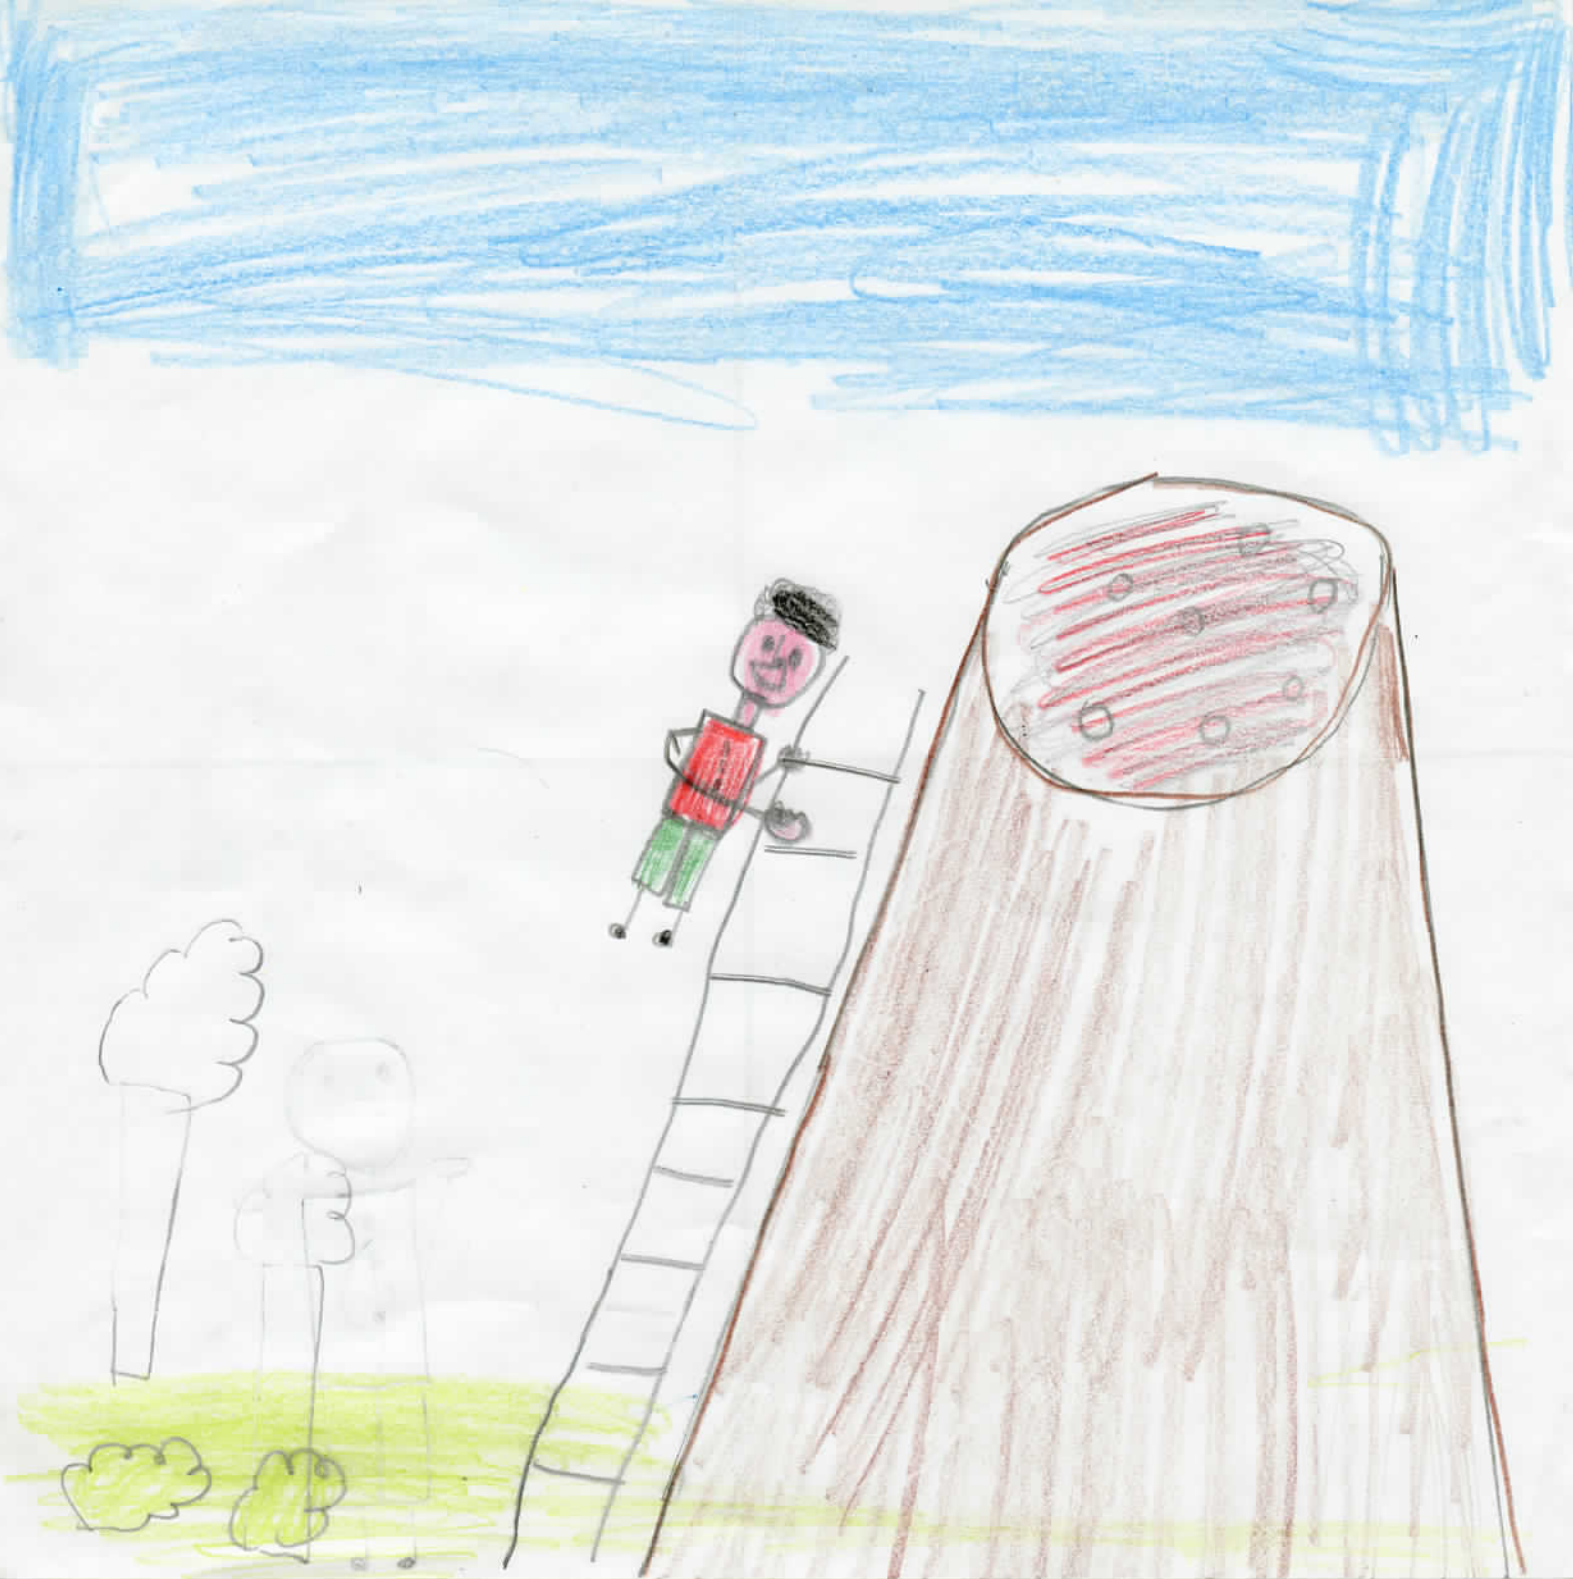

Lo scienziato fa ~~essa~~ degli esperimenti al vesuvio  
poi lo scienziato era andato al vesuvio di Etna  
andò sopra al vesuvio. noi



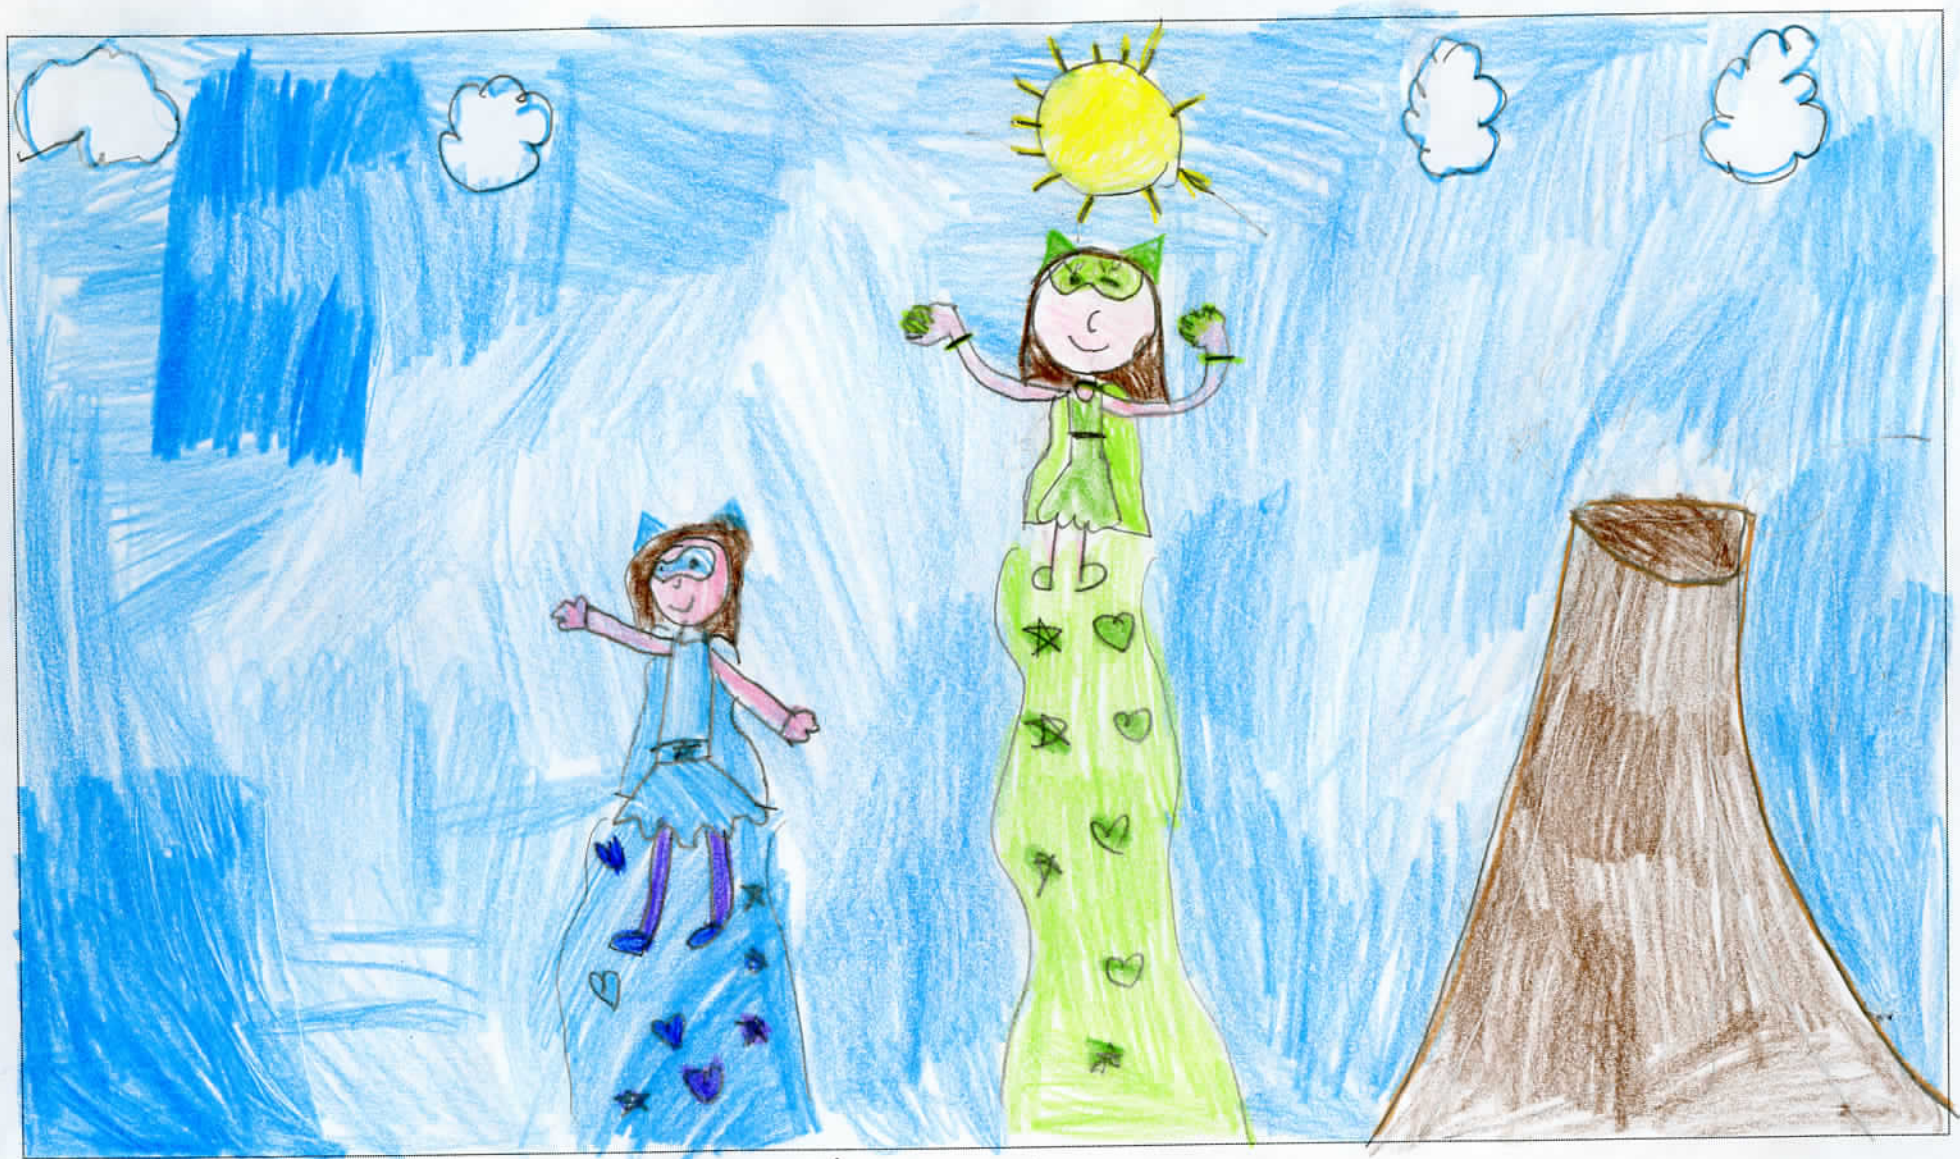

SCENA 1: La quiete - Le super cat volano felici.

N° 6





C'era una volta un uomo di nome Eugenio, esso  
abitava in un vulcano.



## **Supplement 3 - Frame 2 – Volcanic unrest**

Selected examples of the stories' second frame, describing the phase of unrest.

Drawings were realized by the pupils of primary and secondary schools listed in Table 1. The schools' enrolment into the project was discussed by schools' board and then presented to the families at the beginning of the school year, as a part of the school curriculum (Piano Triennale di Offerta Formativa). We did not collect any personal information about the participating students who always worked in pairs or small groups. Students were explicitly asked not to print their full names on their compositions. The production of text and drawings was not compulsory and students were free to decide the degree of their involvement in the exercise. The stories we collected were freely donated to be used for research purposes such as the present manuscript. Originals are kept into the Edurisk archives.

The supplement is provided as a portfolio, with examples of the collected materials.



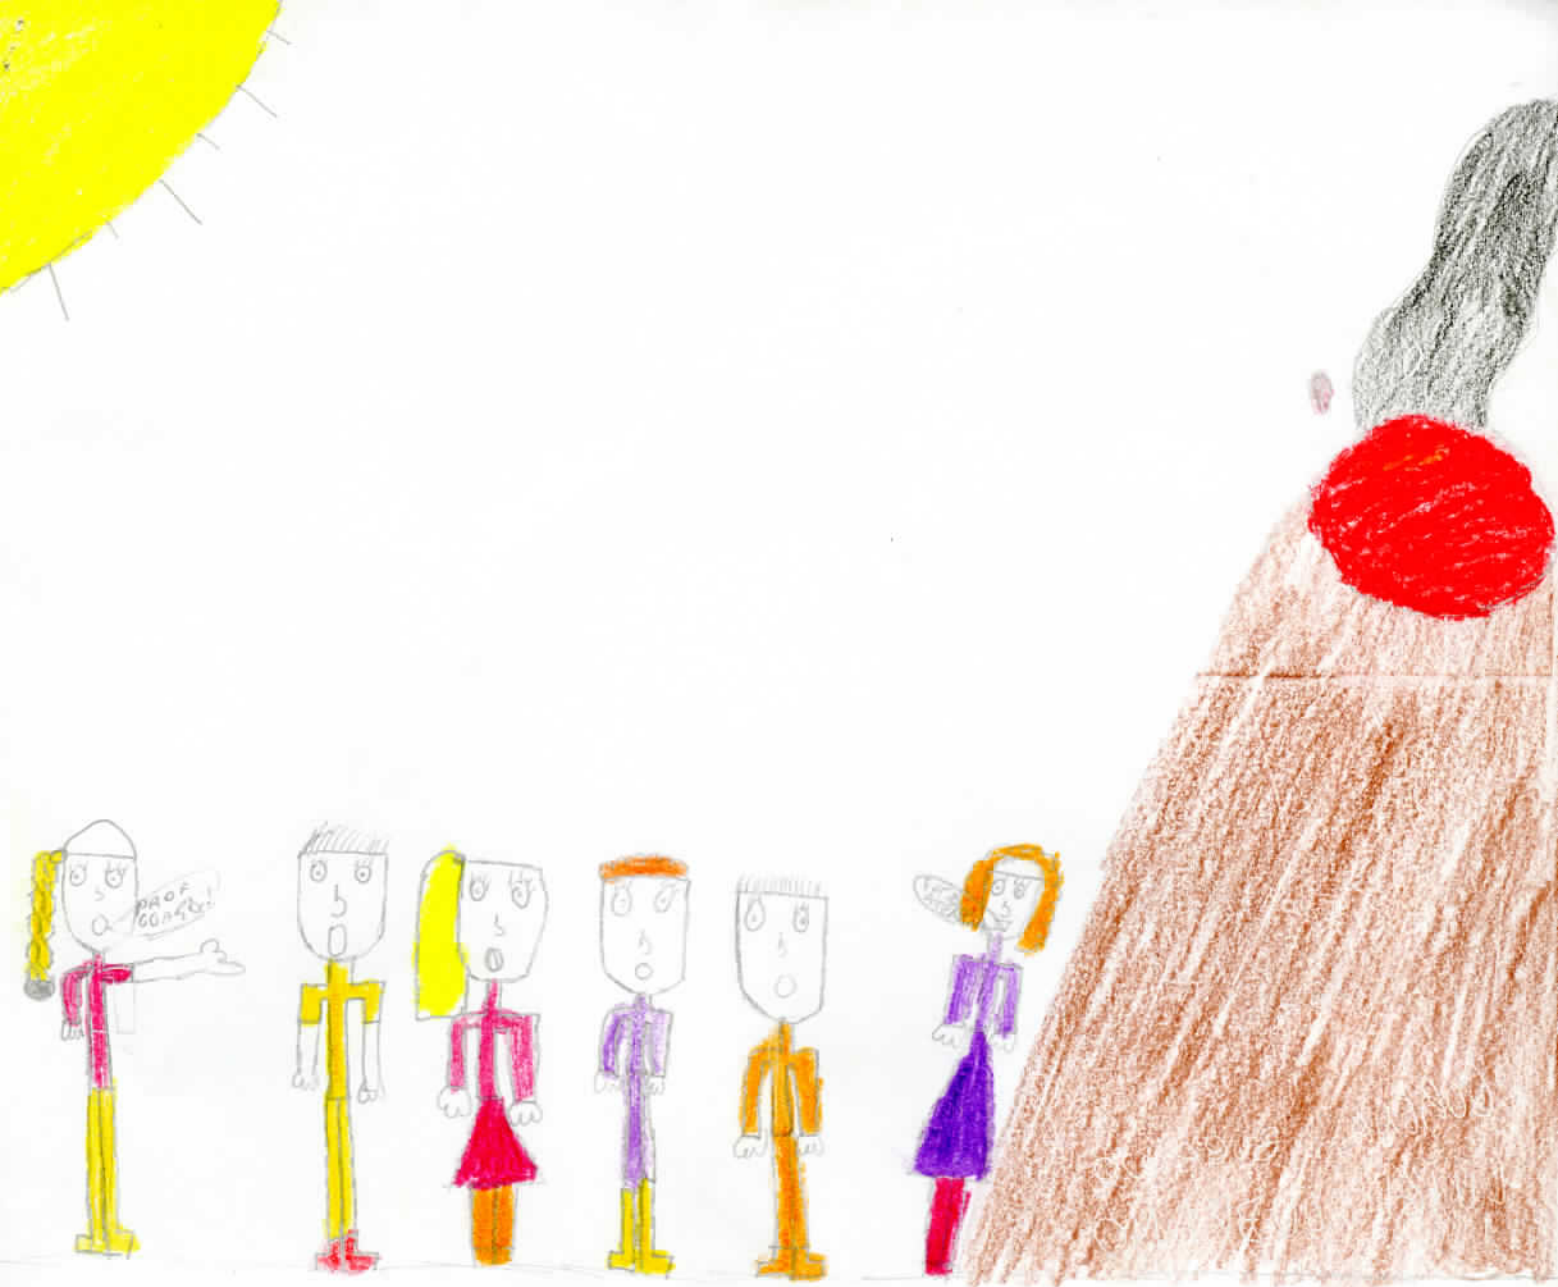

N.2  
I RAGAZZI SI ACCORSERO DI UNA COSA CHE IL VULCANO INIZIA  
A ERUTTARE CIOE CHE ESCE UN PO DI FUMO E VANNO SUBITO A  
CHIAMARE LA PROF.



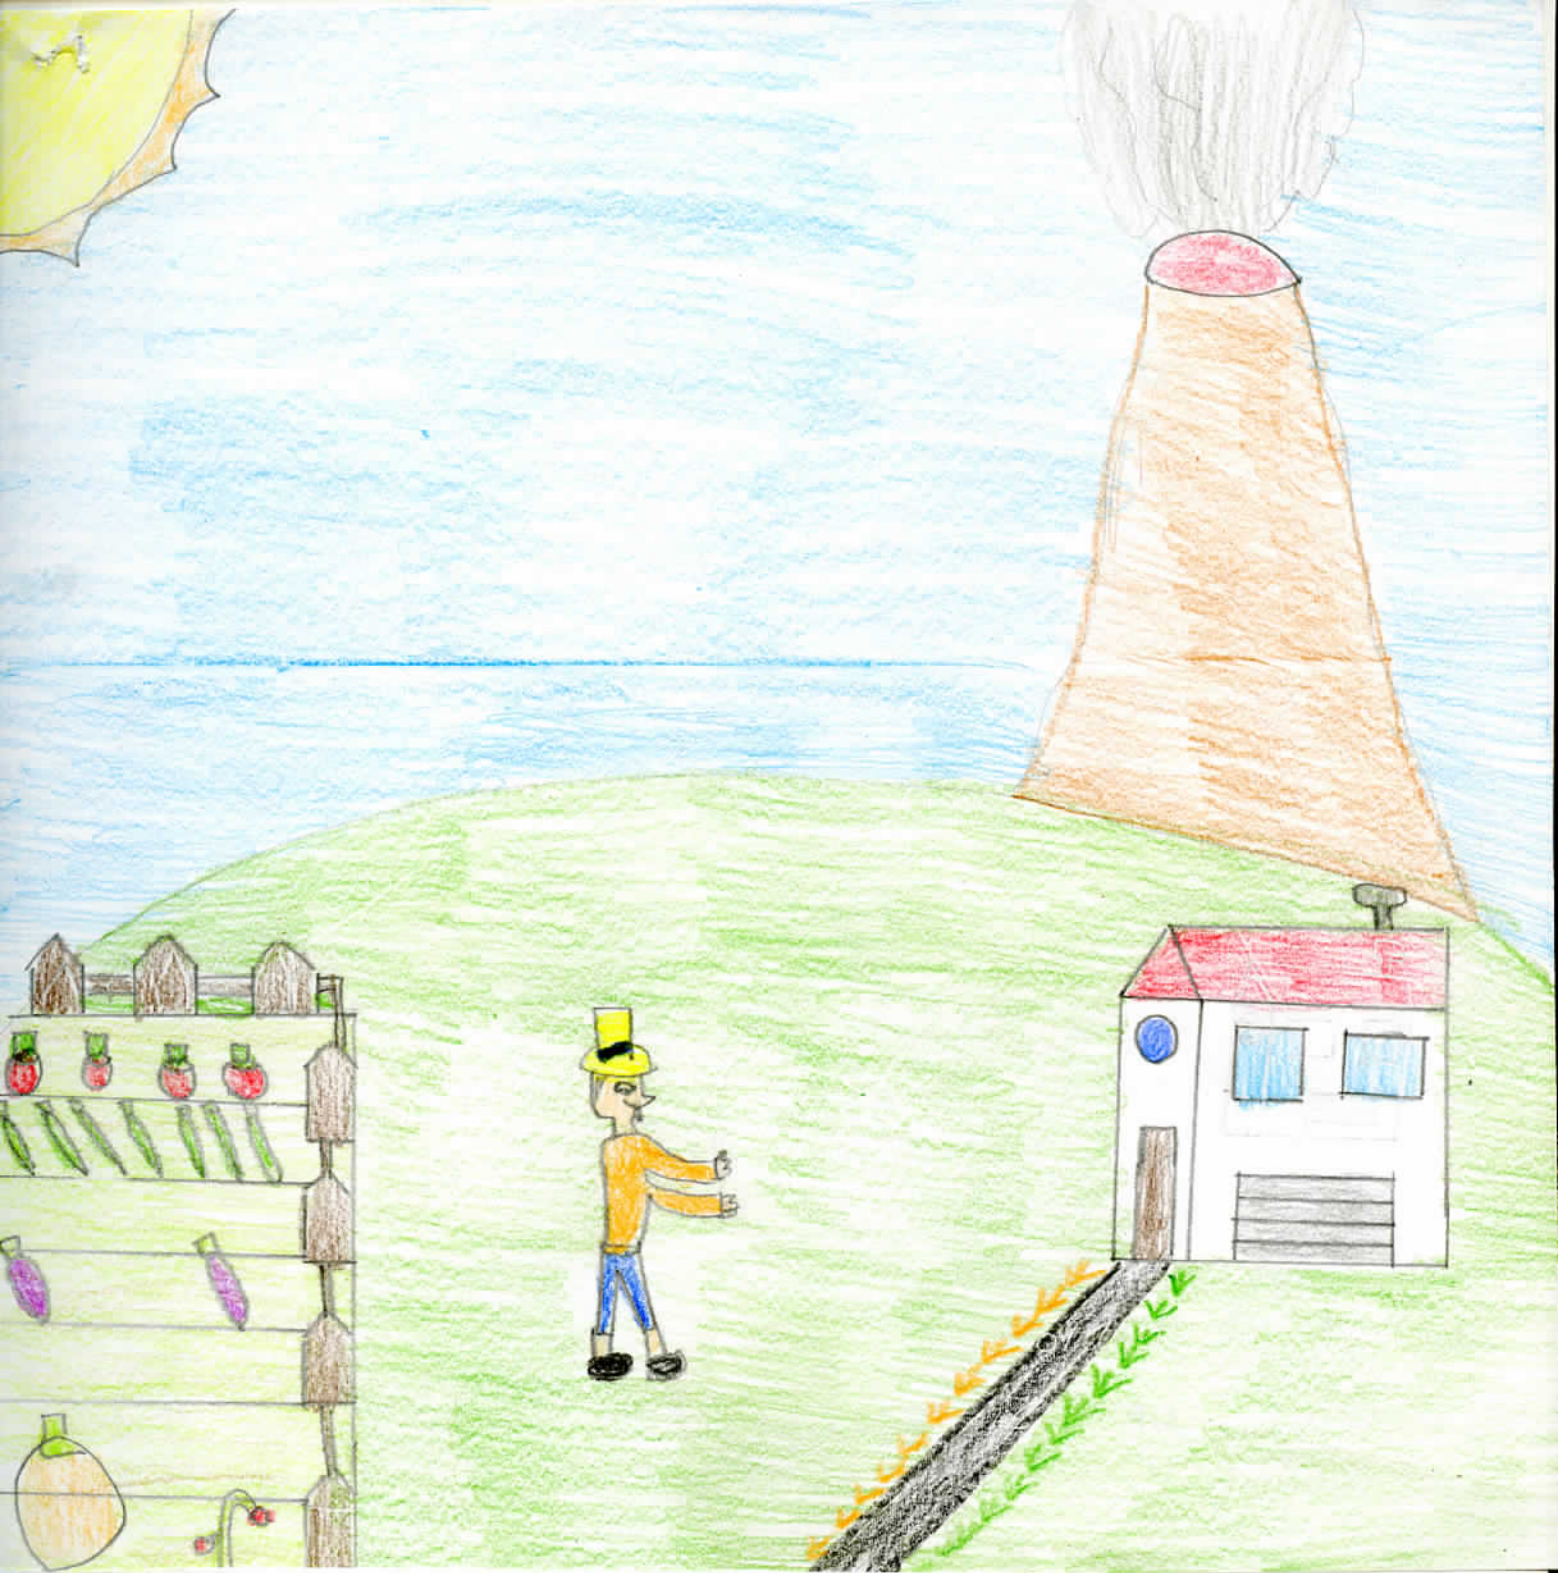

... MENTRE GIUSEPPE COLTIVAVA IL VULCANO INIZIAVA A  
DARE SEGNI PREOCCUPANTI: MANDAVA UN FUMO  
GRIGIO. GIUSEPPE DECISE DI DIRLO ALLA MOGLIE.  
USCIRONO PER VEDERE IL VULCANO E  
DECISERO DI PREPARARE LE VALIGIE E  
PARTIRE.



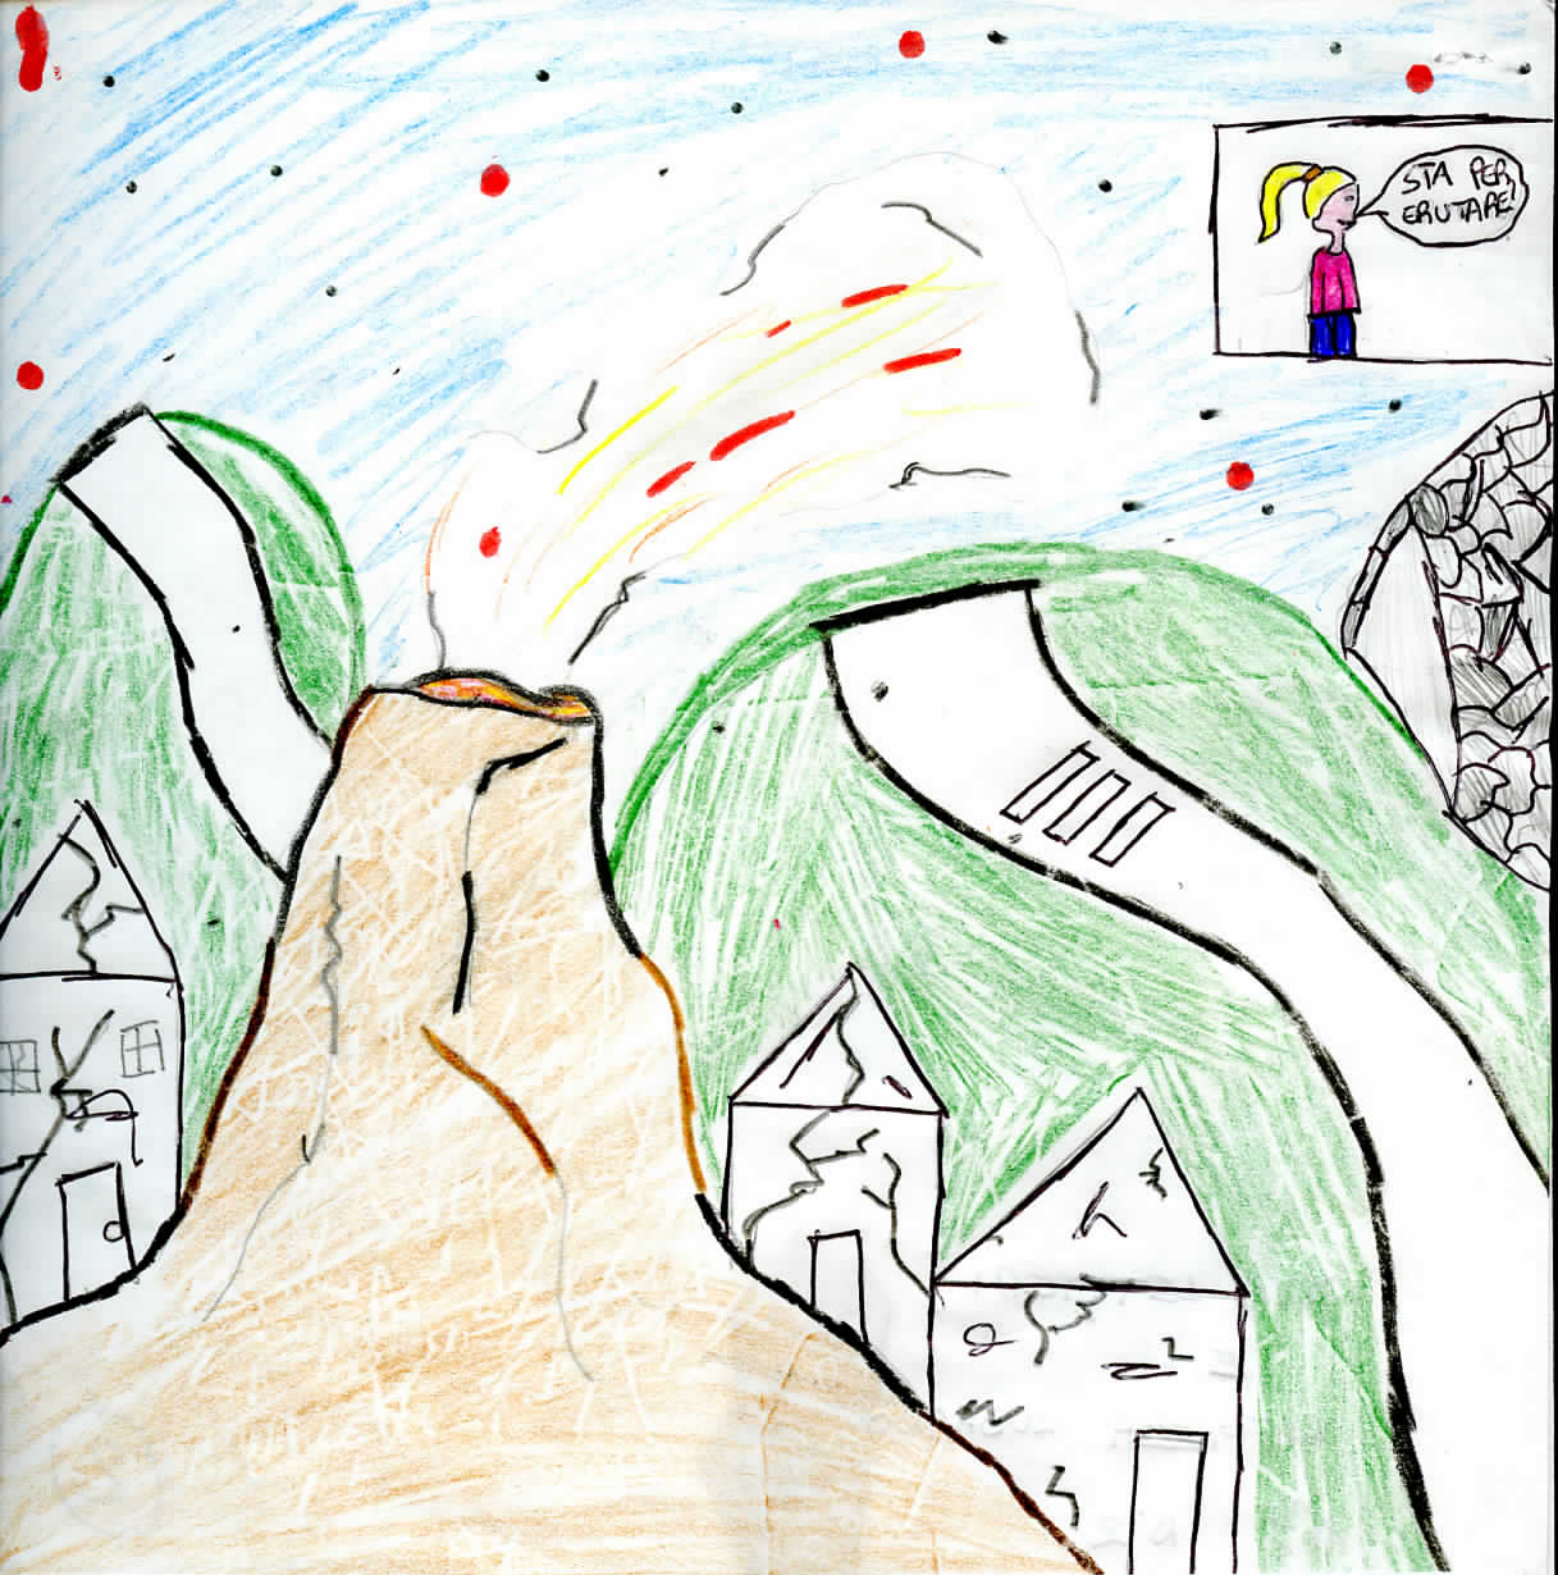

IL VESUVIO INIZIA A DARE SCOSSE DI TERREMOTO. IL MOTO  
 PREOCCUPATA: VA DA I SUOI NONNI CHE CONOSCONO MOLTO  
 BENE IL VESUVIO. IL SI CHIEDE: FORSE STA PER ERUTARE?  
 DAI NONNI NON VIENE DATA RISPOSTA.

IL CANE CHARCHIE INIZIA AD ABBAIARE PER LA PAURA, COSÌ IL  
 PER TRANQUILLIZARLO GLI FA UN PÒ DI COCCOLE CON TIMORE CHE  
 UNO E L'ALTRO NON POSSANO PIÙ RIVEDERSI.



Schema n°2

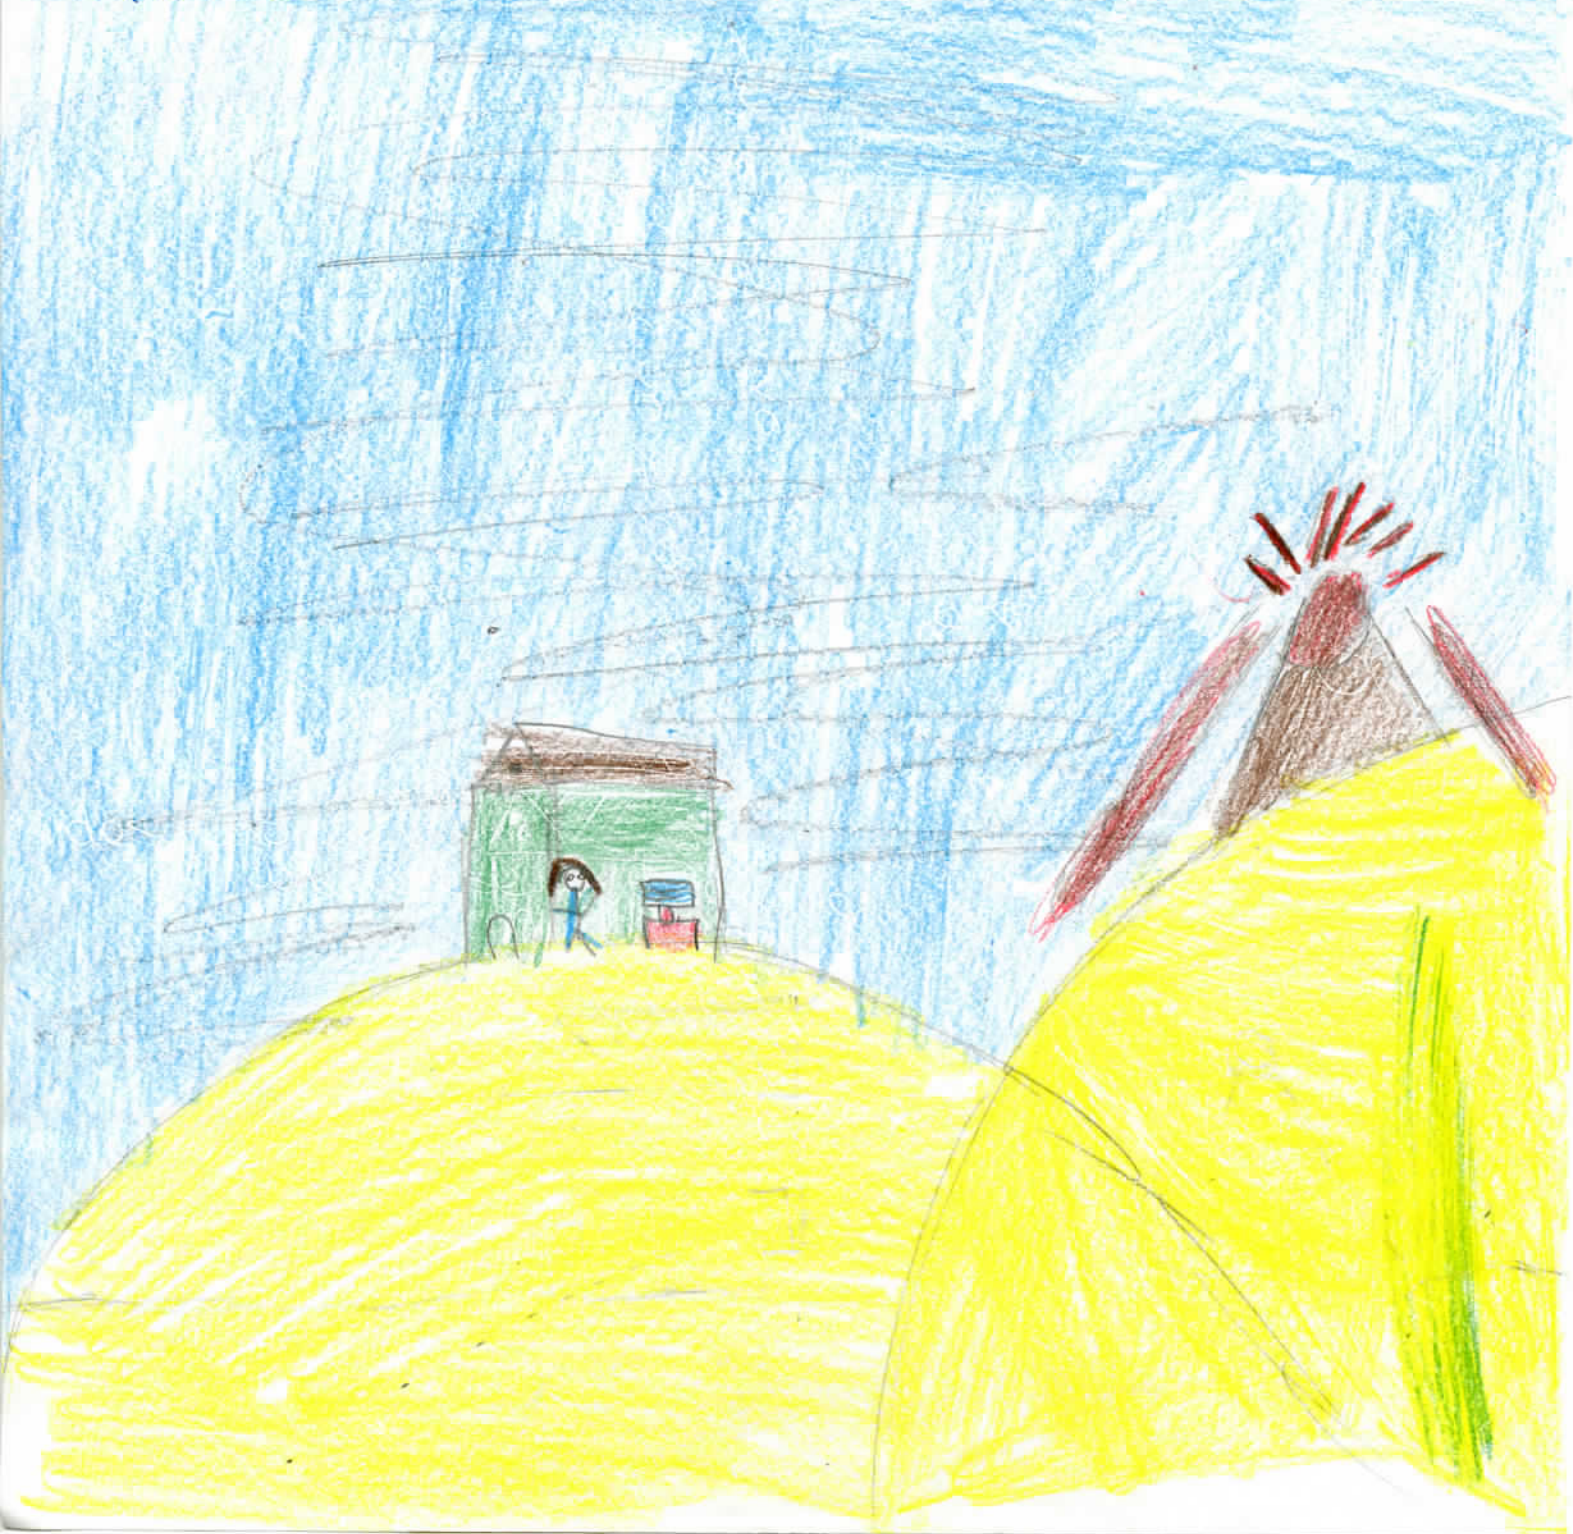

Schema N2

Un giorno Luca sentì dei rumori strani, che non aveva mai sentito visto che il posto dove abitava era desolato. Lui accese la tv e vide e si accorse che dove abitava c'era un vulcano, ma soprattutto che quel vulcano era esploso e che lui doveva scappare.



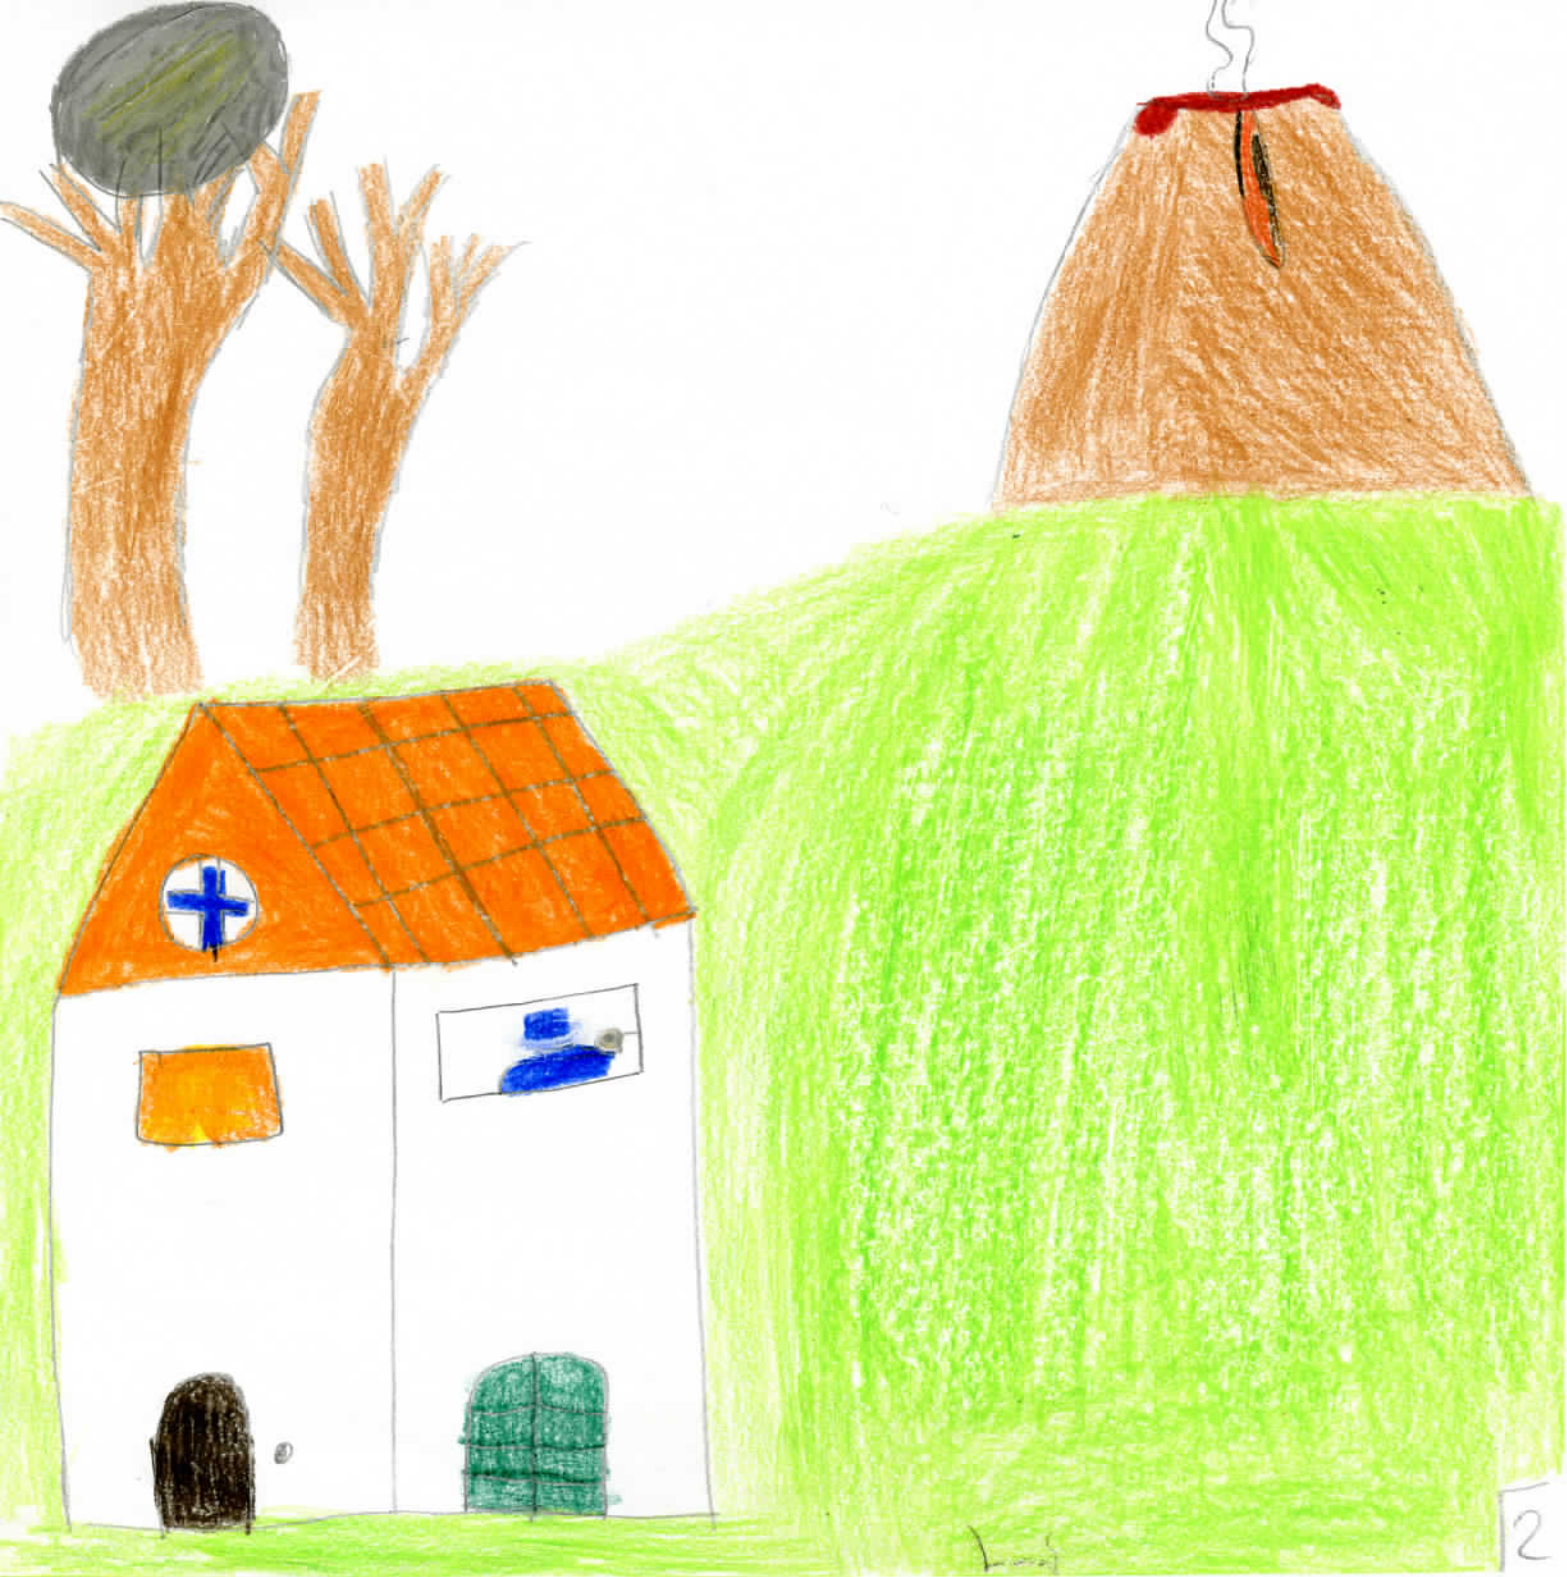

Locke andò a dormire e il vulcano iniziò a combinarsi, ~~si tentava~~ emettere fumo e cacciare  
piccole gocce di lava. Il giorno dopo Locke si svegliò e guardò quello che stava accadendo.  
Il borciolo era preoccupato e non lo divise con nessuno per non far mettere paura agli  
abitanti della sua città. Fino a quando...



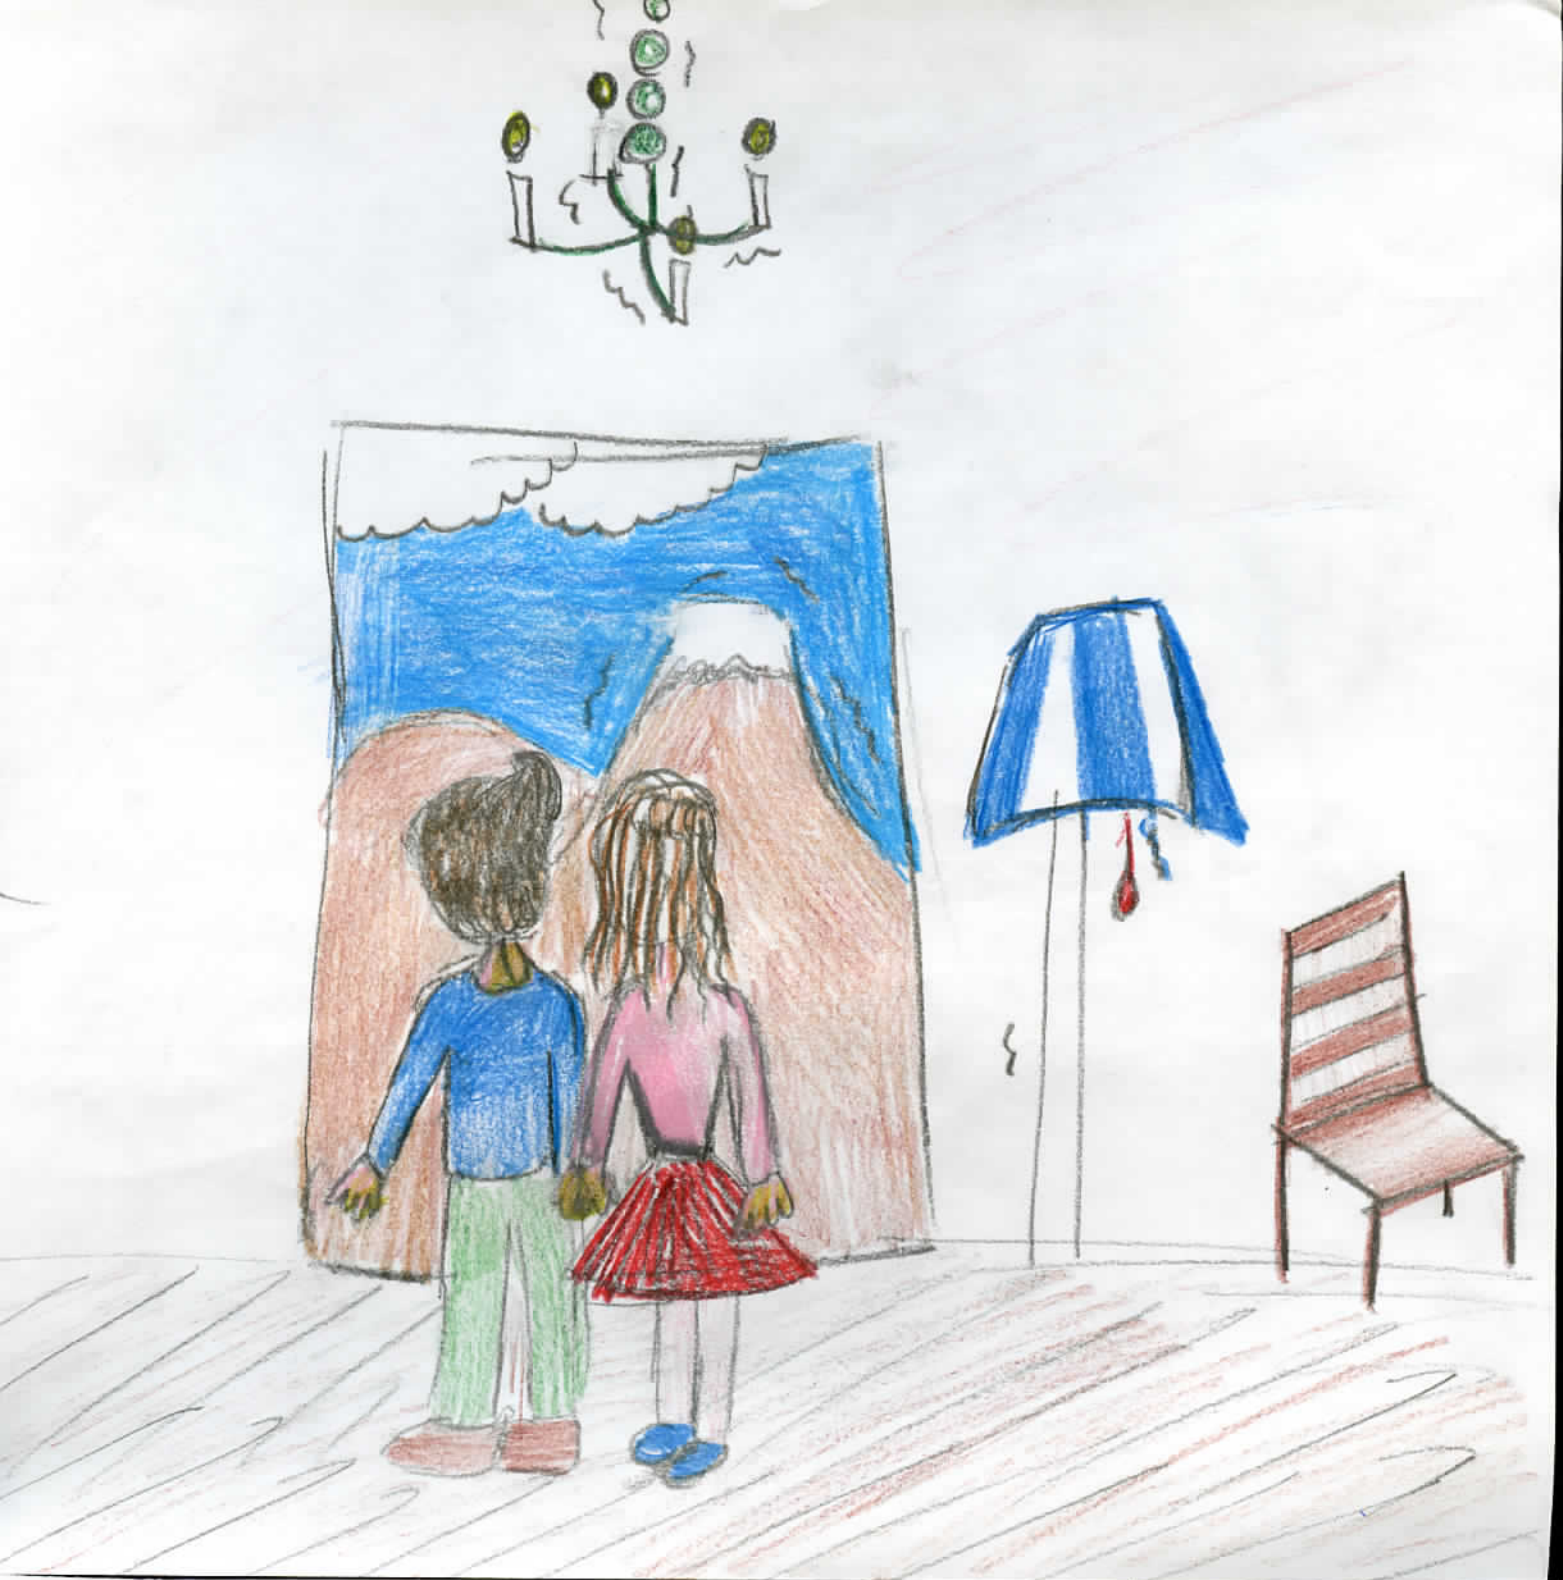

Un giorno Simone e Valerio si affacciarono alla finestra e videro una cosa molto strana nel Vesuvio. Videro che si muoveva come se volesse staccarsi dal terreno. Andarono subito a chiamare i loro genitori dicendogli loro quello che avevano visto. loro però ridendo gli dissero che non era possibile. I due ragazzi andarono a dirlo ai loro fratelli ma anche loro non li crederono.



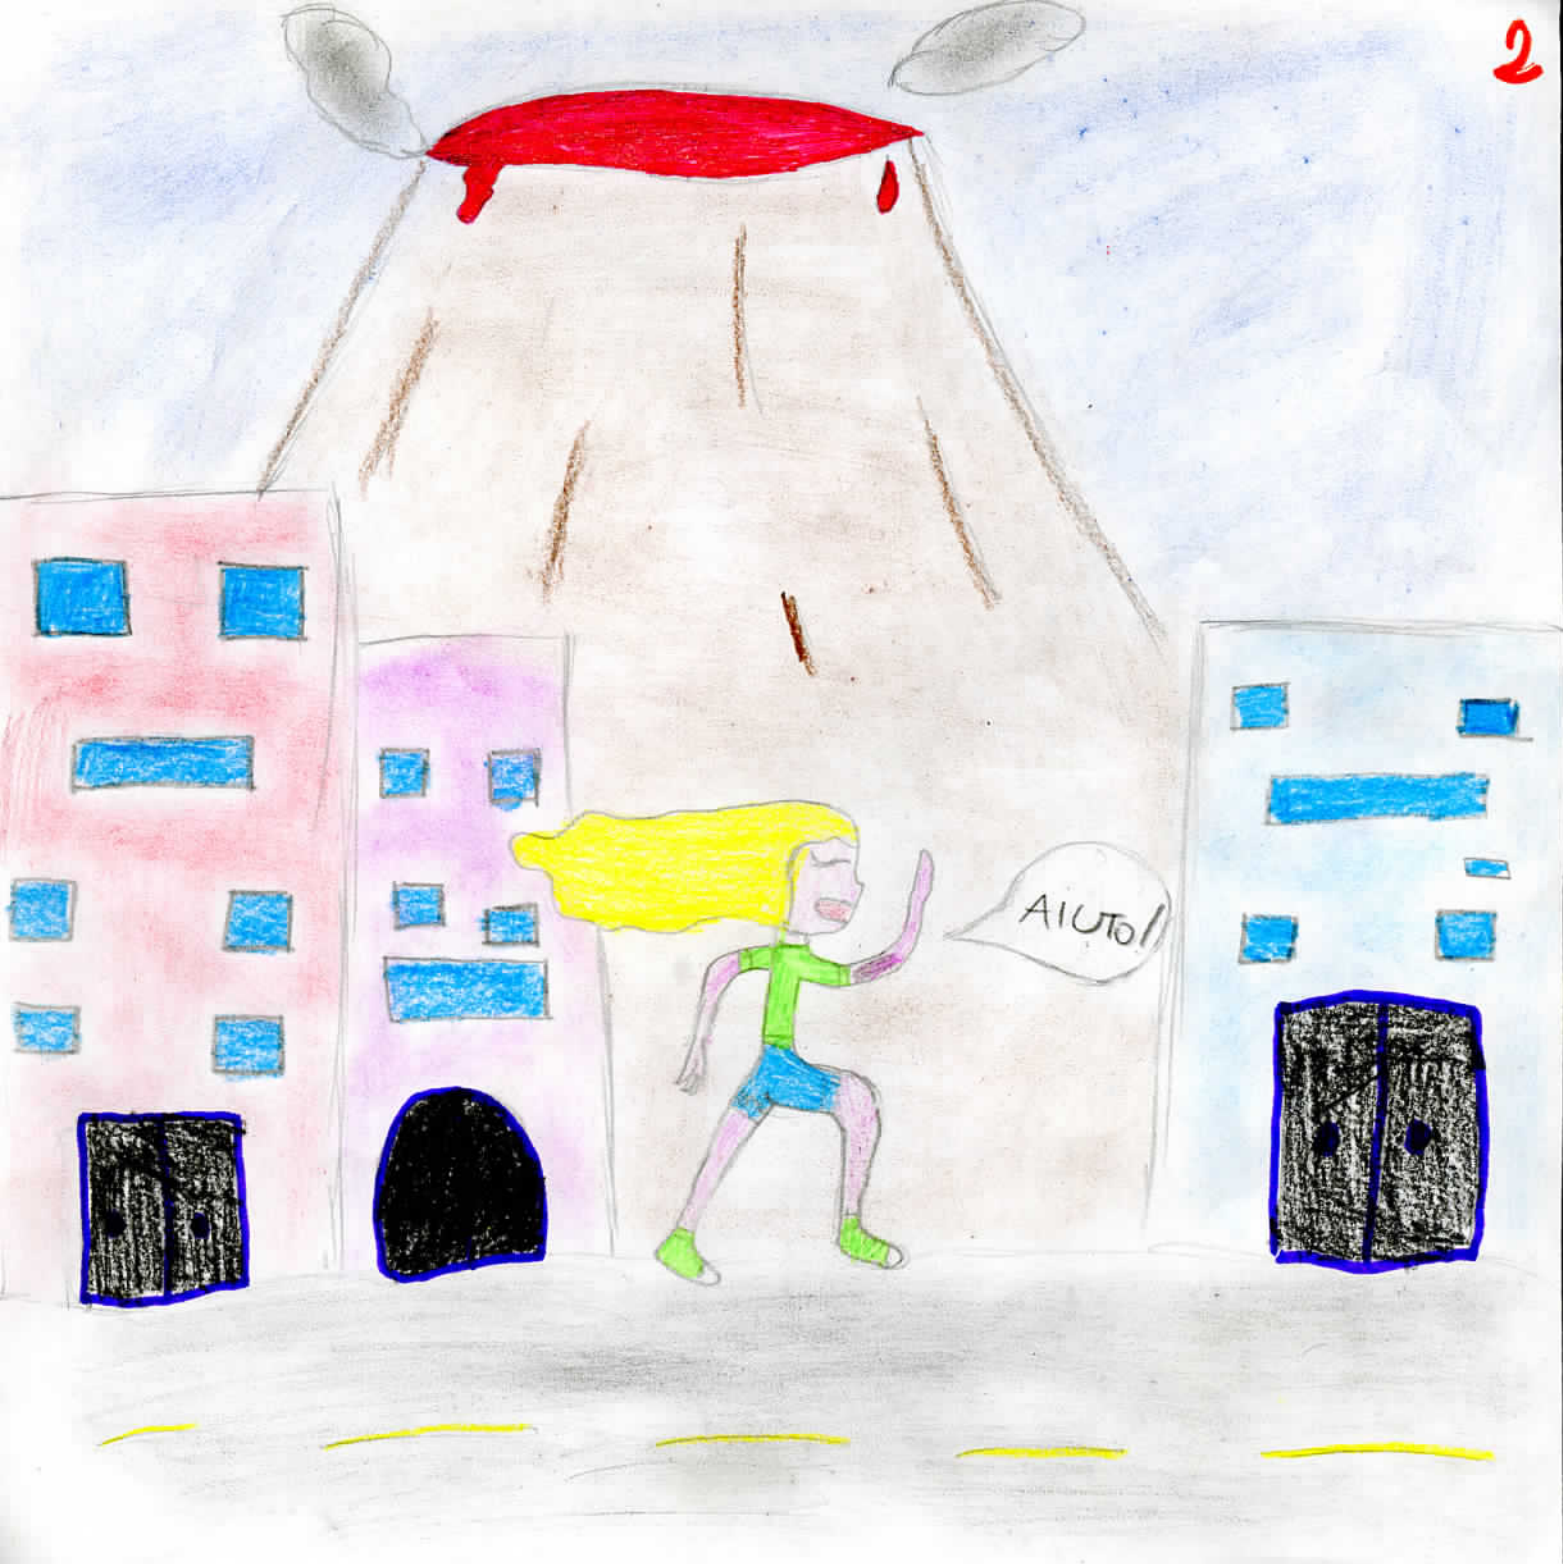

Ormanola si accorse che il vulcano stava per eruttare  
e cominciò a correre per la città ad avvisare tutti



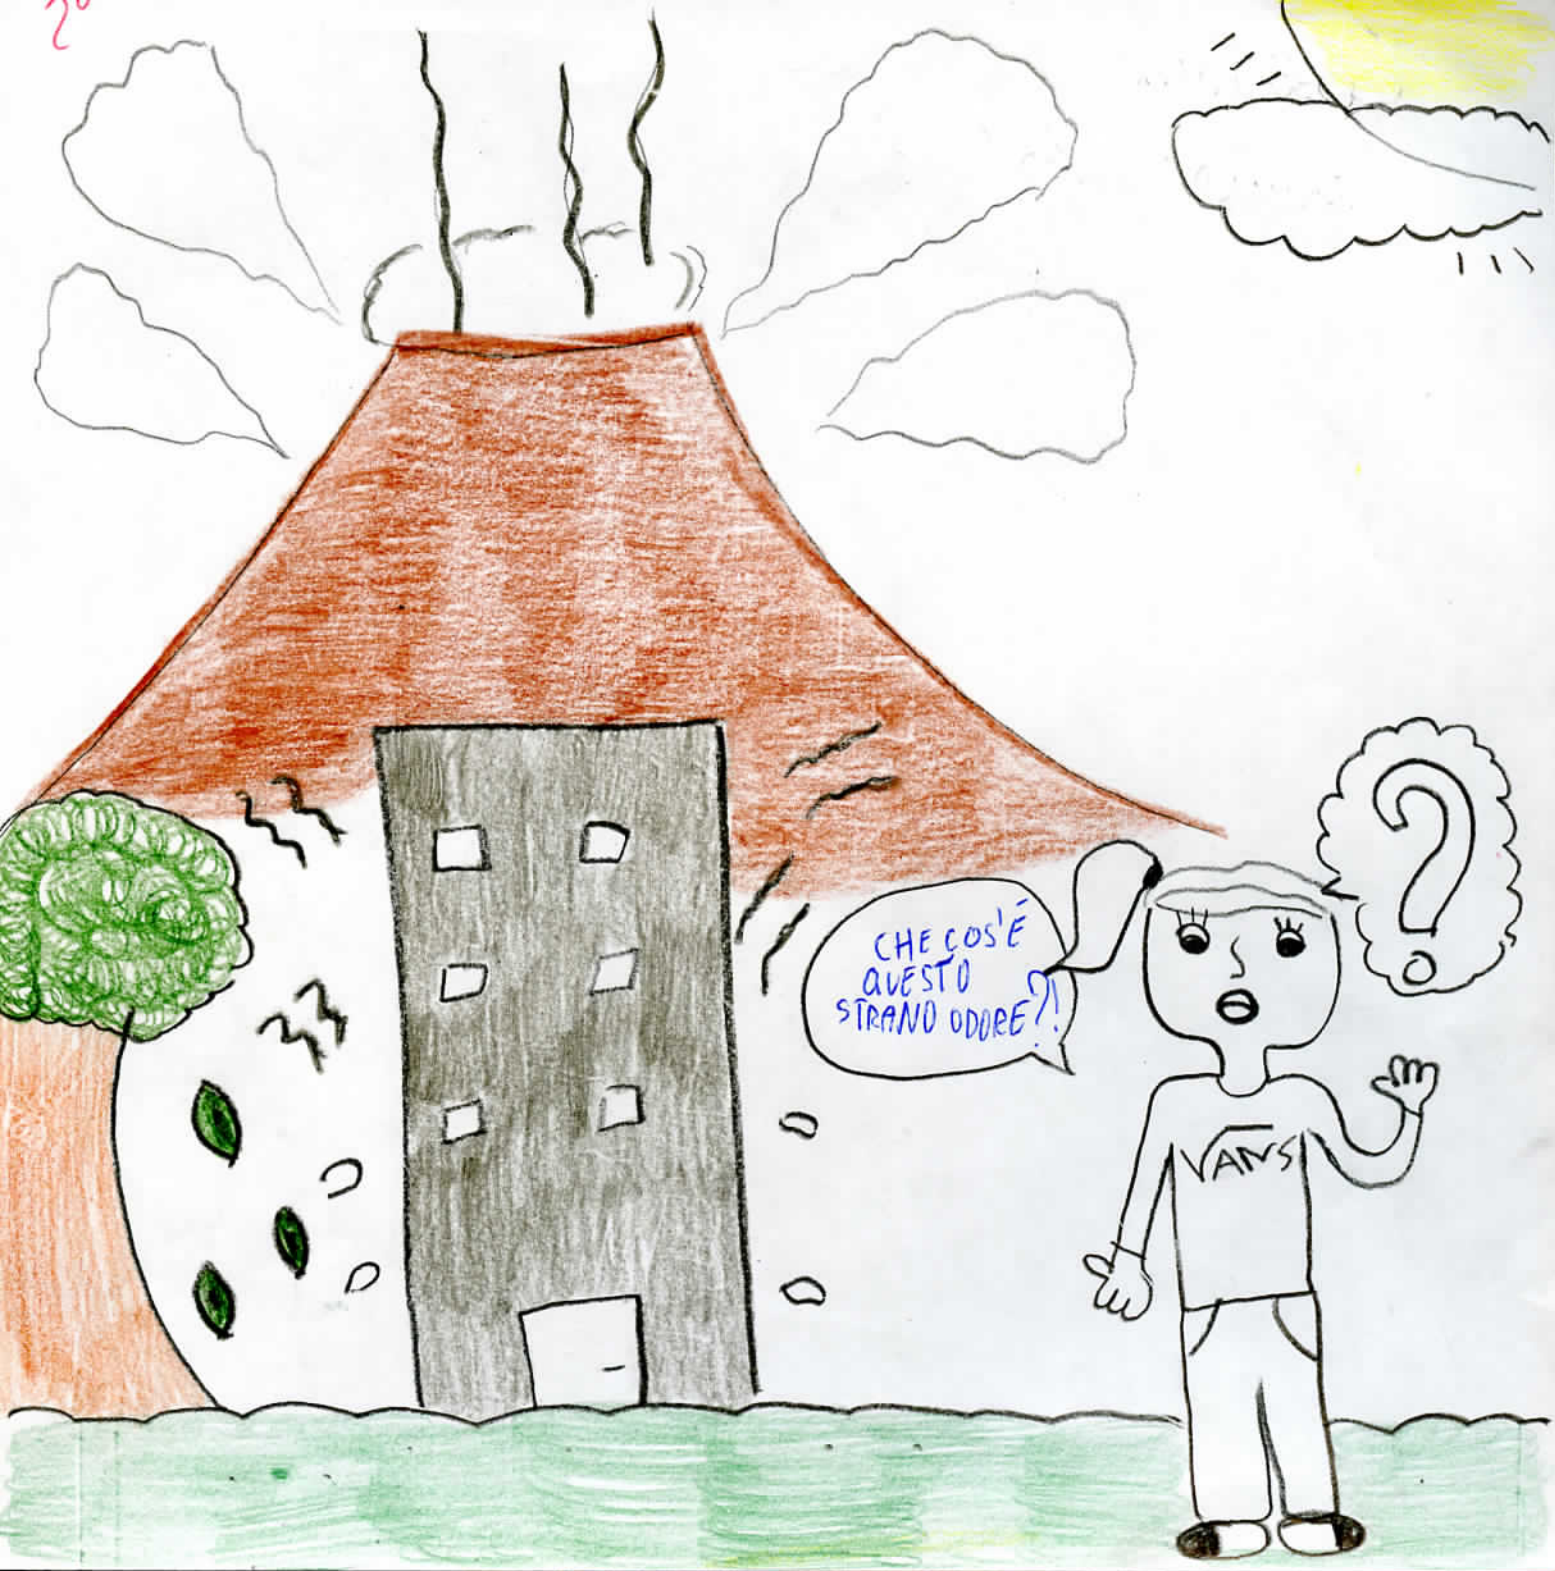

2° *dubasealin.*

margherita inizia a preoccuparsi.

Sentiva strani odori, i palazzi iniziarono a tremare e lo stesso giorno c'era un sole brillante, ma all'improvviso una mureda grigia coprì tutto.



Scene 2

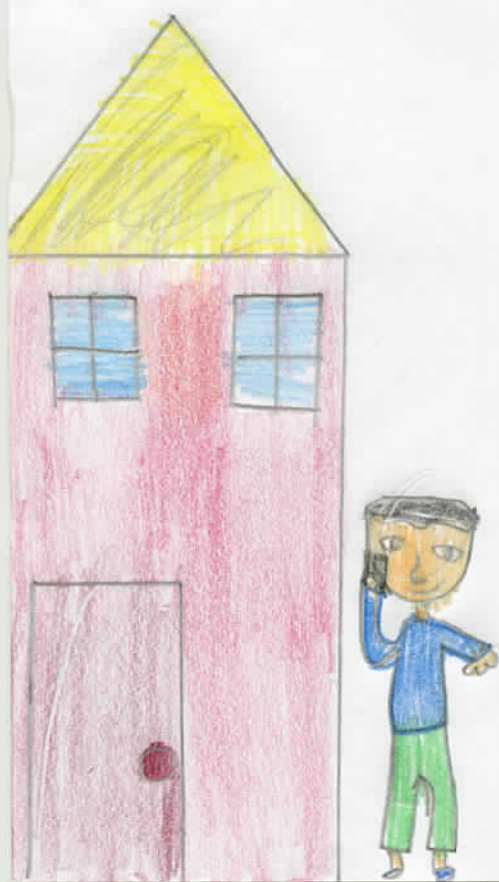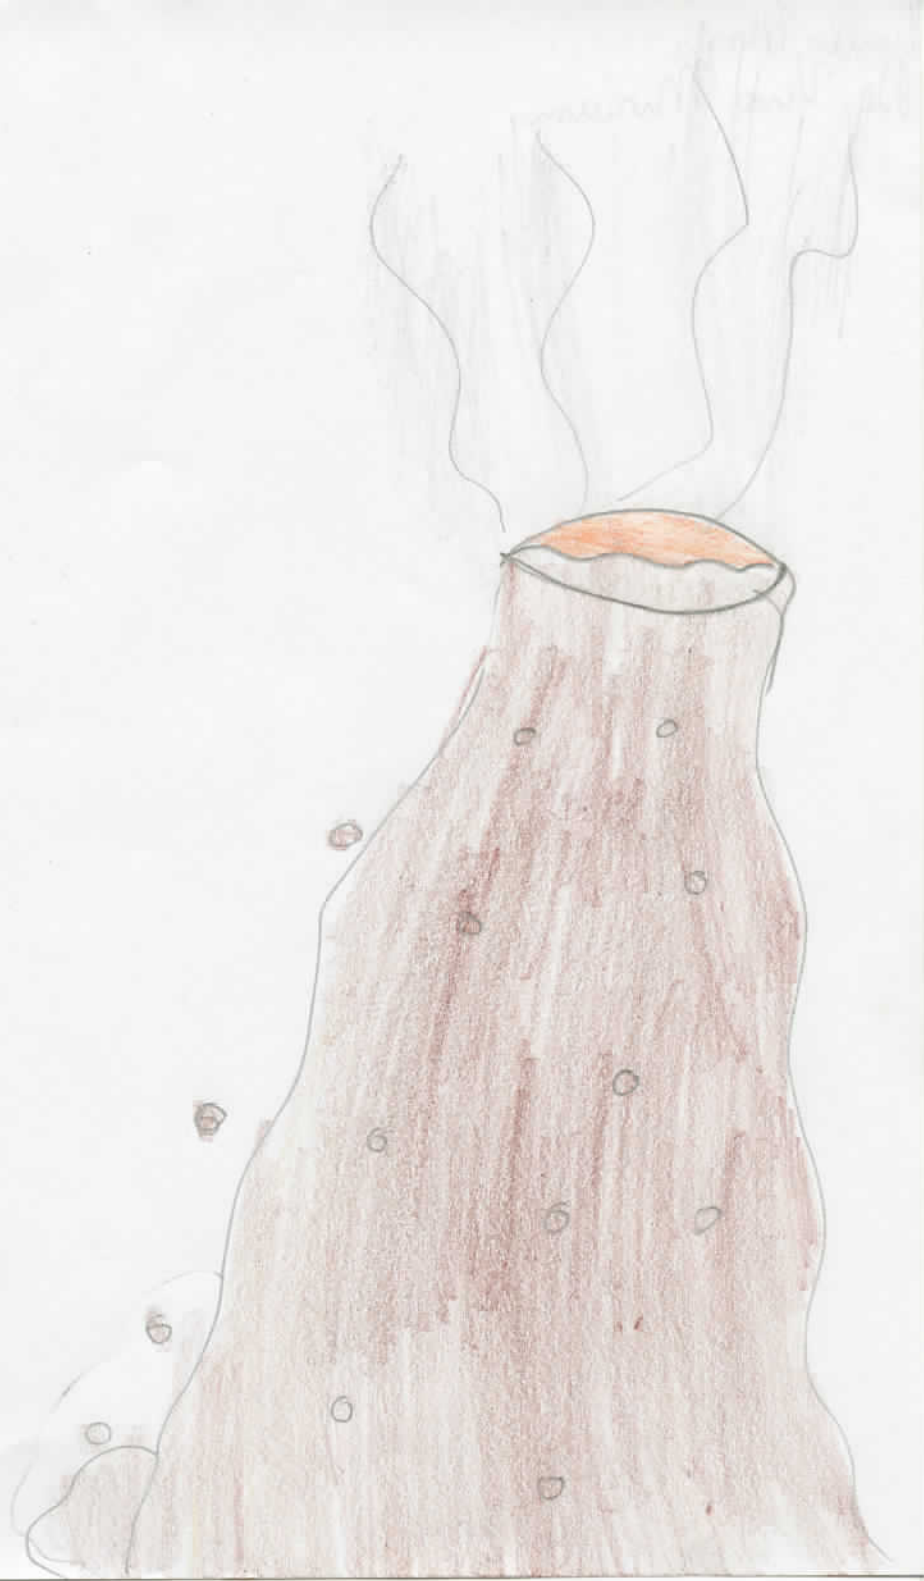

Scene 2

Harry iniziò a sentire dei rumori strani provenienti dal vulcano  
e iniziò a parlarne con il suo amico con il telefono



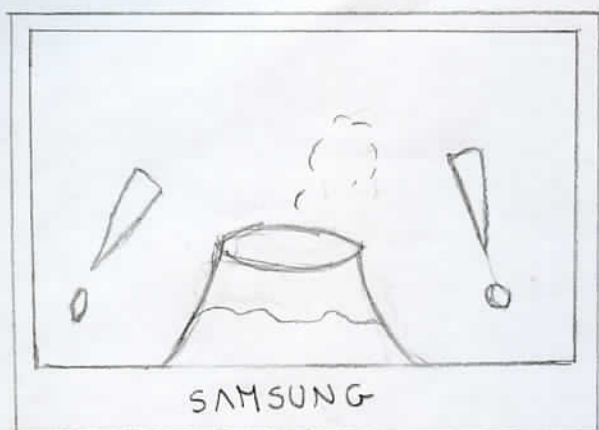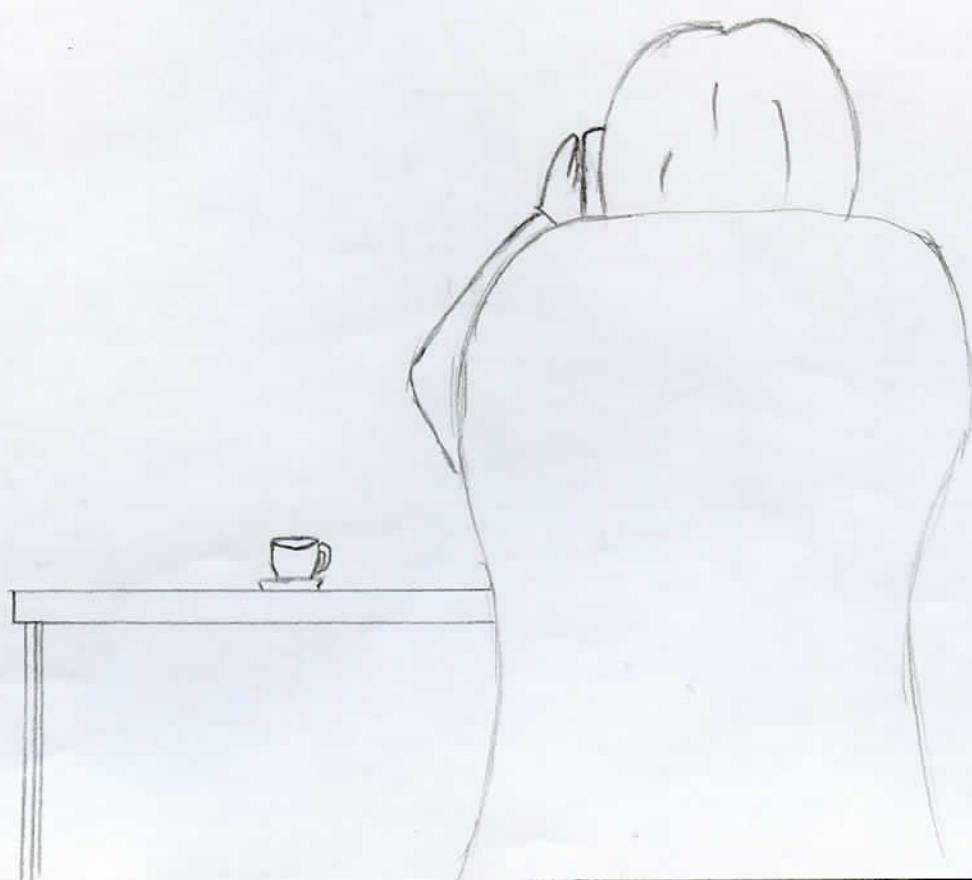

SIMIN ACCESE IL TELEVISORE E, FACENDO ZAPPING, SI FERMO' SUL CANALE DELLE NEWS, DOVE STAVANO TRASMETTENDO DELLE NOTIZIE RIGUARDANTI IL VULCANO VICINO, CHE LUI POTEVA AMMIRARE DALLA SUA FINESTRA. SIMIN ALLORA CHIAMO' J-HOPE, IL SUO MIGLIORE AMICO, PER CHIEDERGLI SE C'ERA DA PREOCCUPARSI SECONDO LUI. J-HOPE RISPOSE DI NO, PERCHE' ERANO SOLO NOTIZIE PASSAGGERE E NORMALI, SECONDO LUI. MA SIMIN NON SI FIDAVA E INIZIO' A PREPARARSI UNA VALIGIA PER RAGGIUNGERE I GENITORI A OSAKA.



## **Supplement 4 - Frame 3 – The eruption**

Selected examples of the stories' third frame, describing the volcanic eruption.

Drawings were realized by the pupils of primary and secondary schools listed in Table 1. The schools' enrolment into the project was discussed by schools' board and then presented to the families at the beginning of the school year, as a part of the school curriculum (Piano Triennale di Offerta Formativa). We did not collect any personal information about the participating students who always worked in pairs or small groups. Students were explicitly asked not to print their full names on their compositions. The production of text and drawings was not compulsory and students were free to decide the degree of their involvement in the exercise. The stories we collected were freely donated to be used for research purposes such as the present manuscript. Originals are kept into the Edurisk archives.

The supplement is provided as a portfolio, with examples of the collected materials.



3

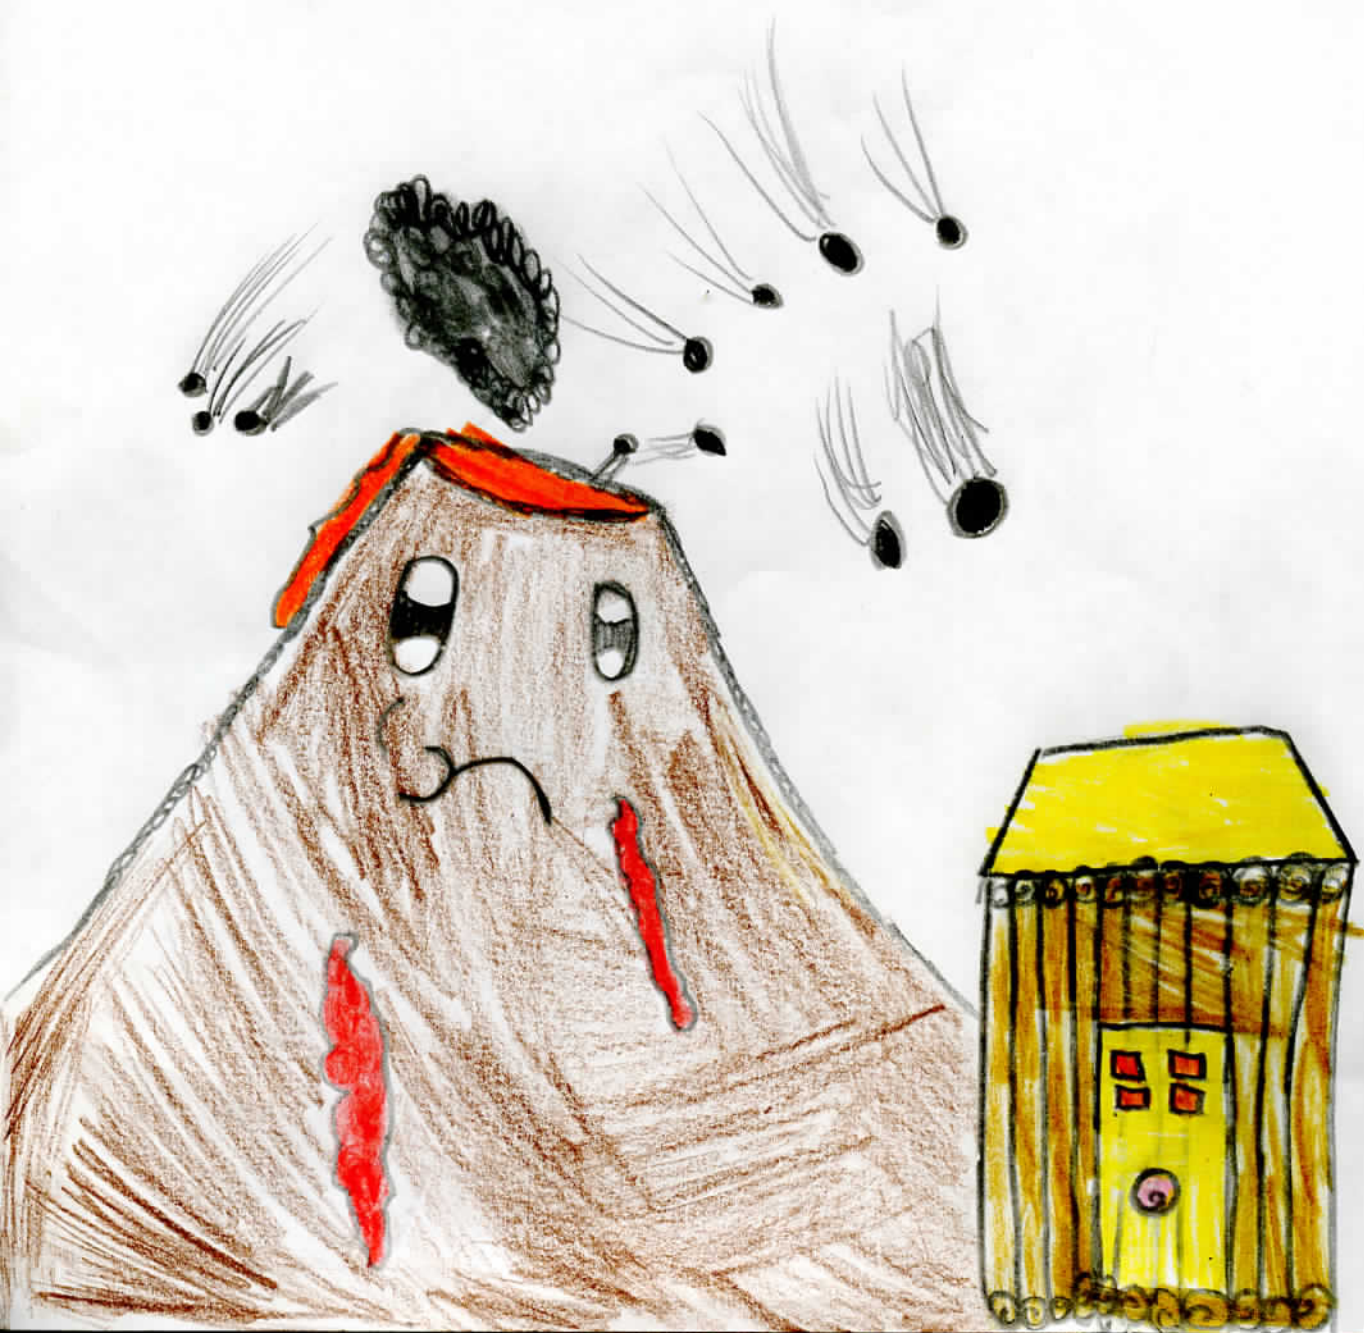

Dal cratere del vulcano comincia ad uscire della lava. I protagonisti e gli altri entrano nella capanna di riparo. Poi arriva un mago e piovono le macerie.

3



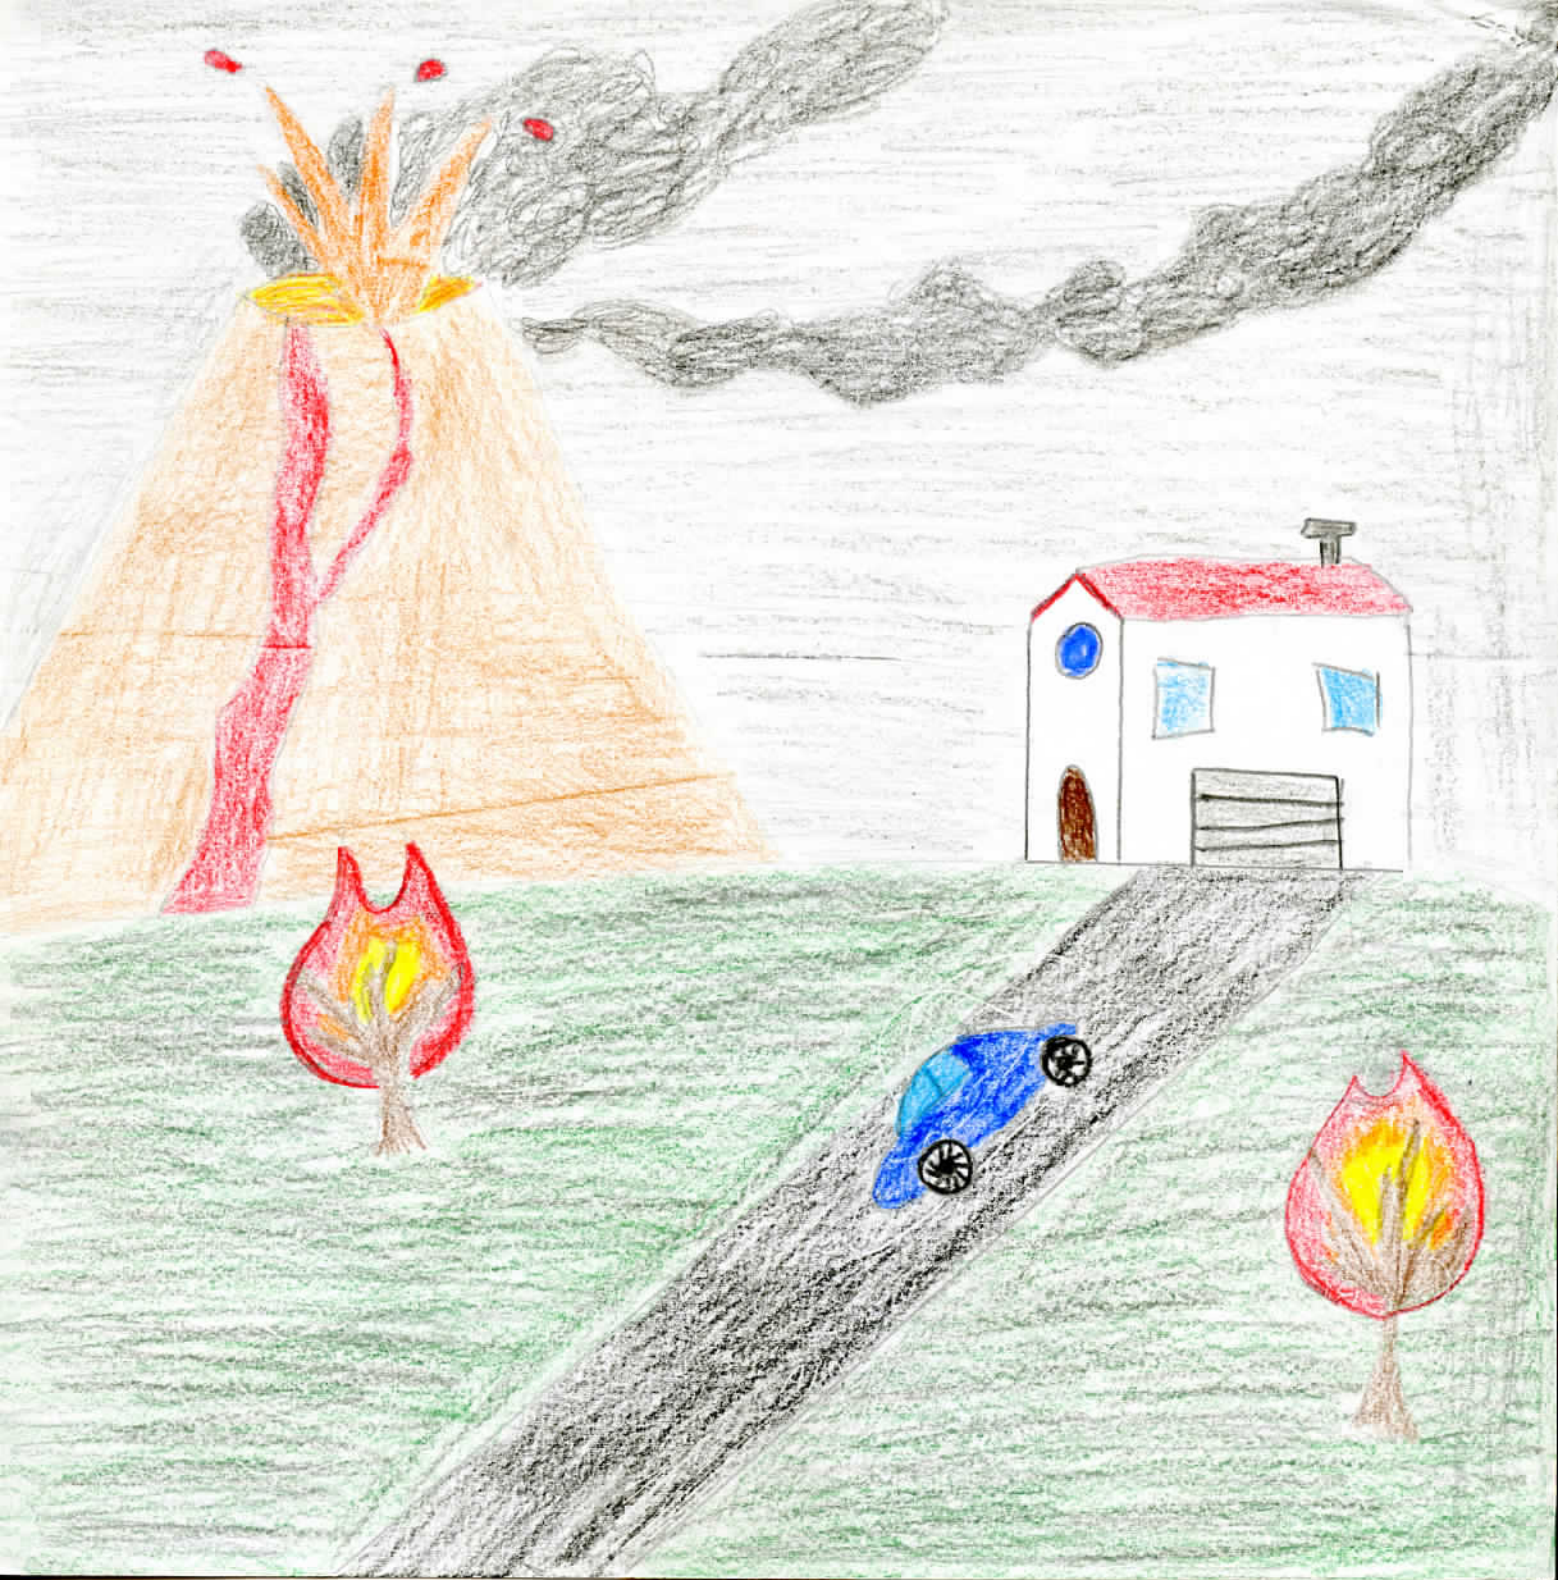

GIUSEPPE E LA FAMIGLIA SI MISERO IN MACCHINA E PARTIRONO. GUARDANDO IL TERRENO DAL FINESTRINO VIDERO CHE ERA GRIGIO, IL TERRITORIO PIENO DI FUMO, GLI ALBERI CHE PRENDEVA IL FUOCO, IL VULCANO CHE ERUTAVA TANTISSIMO...



③

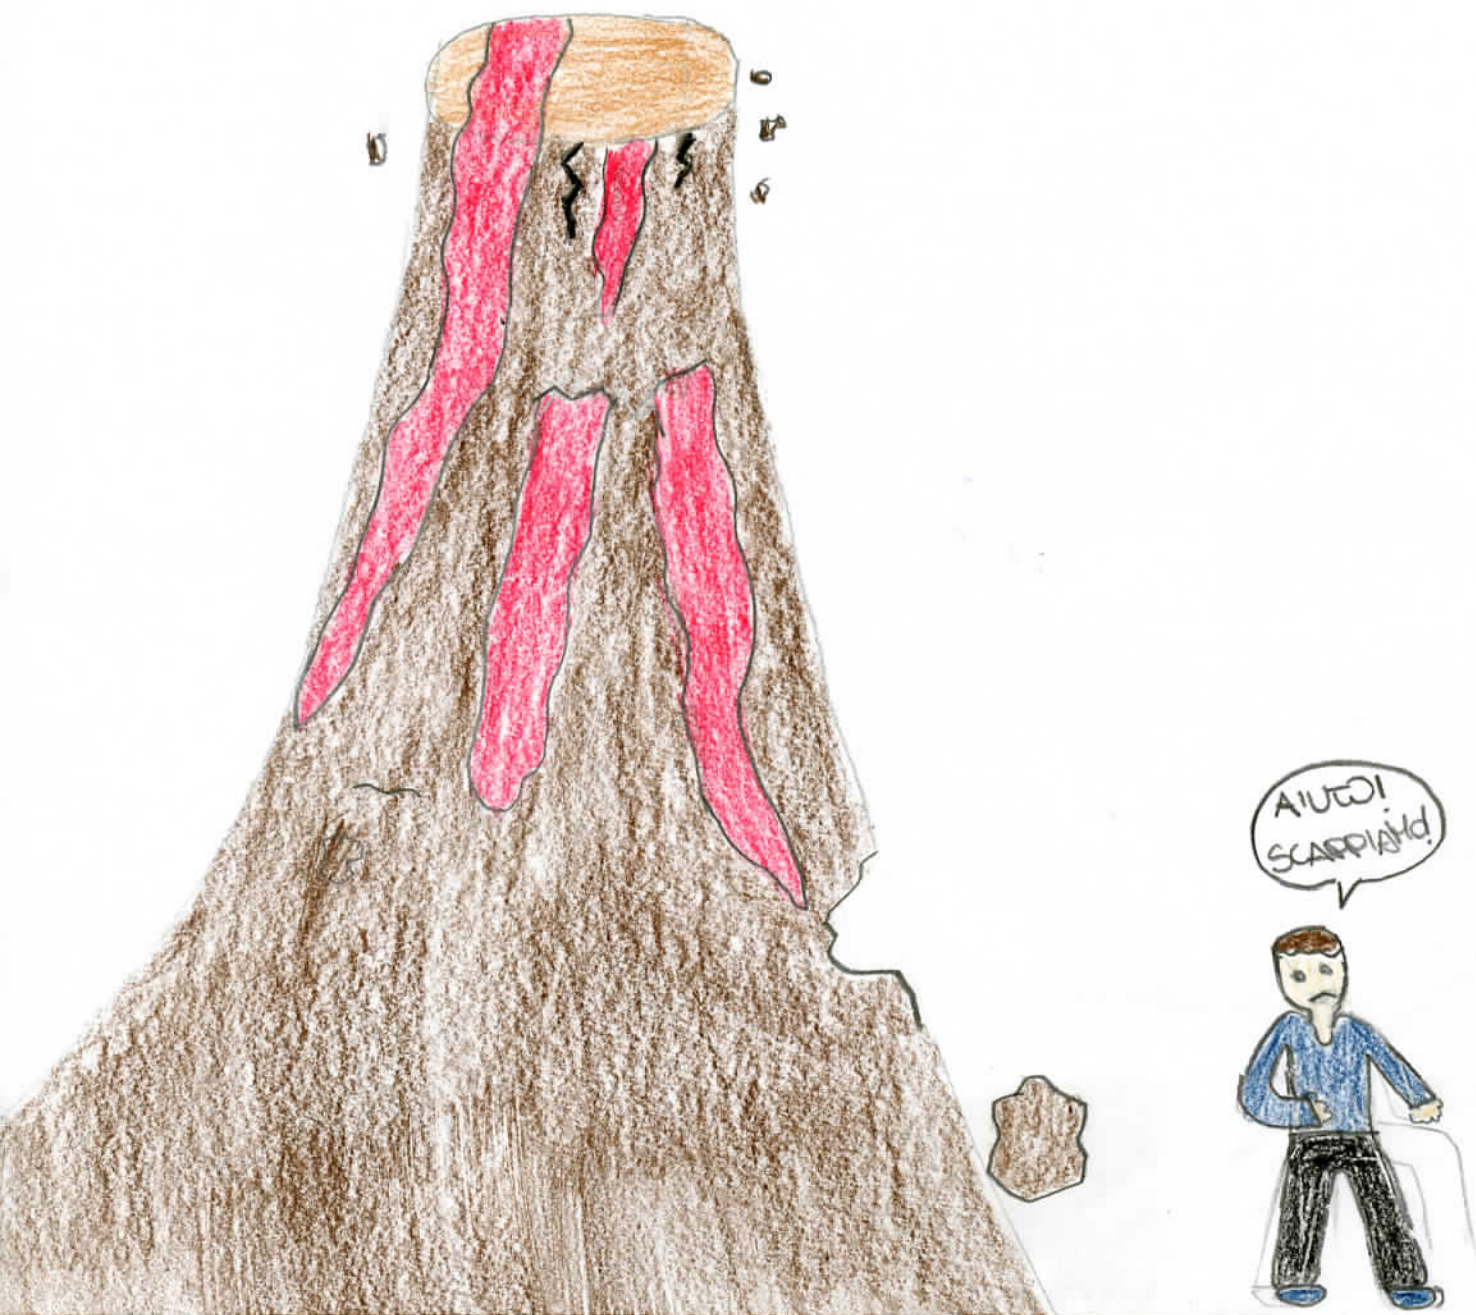

Dopo poco arrivò una scossa più forte e il vulcano incominciò  
ad eruttare pietre, lapilli e lava bollente. Per loro arrivò  
il momento di scappare. Avvisarono subito la polizia che  
avvisò tutto il paese e in quel momento ci fu un momento  
di panico, e' era gente che correva dappertutto e urlava.  
La polizia disse di seguirlo e si andarono a rifugiare nella  
parte più lontana dal vulcano.

③



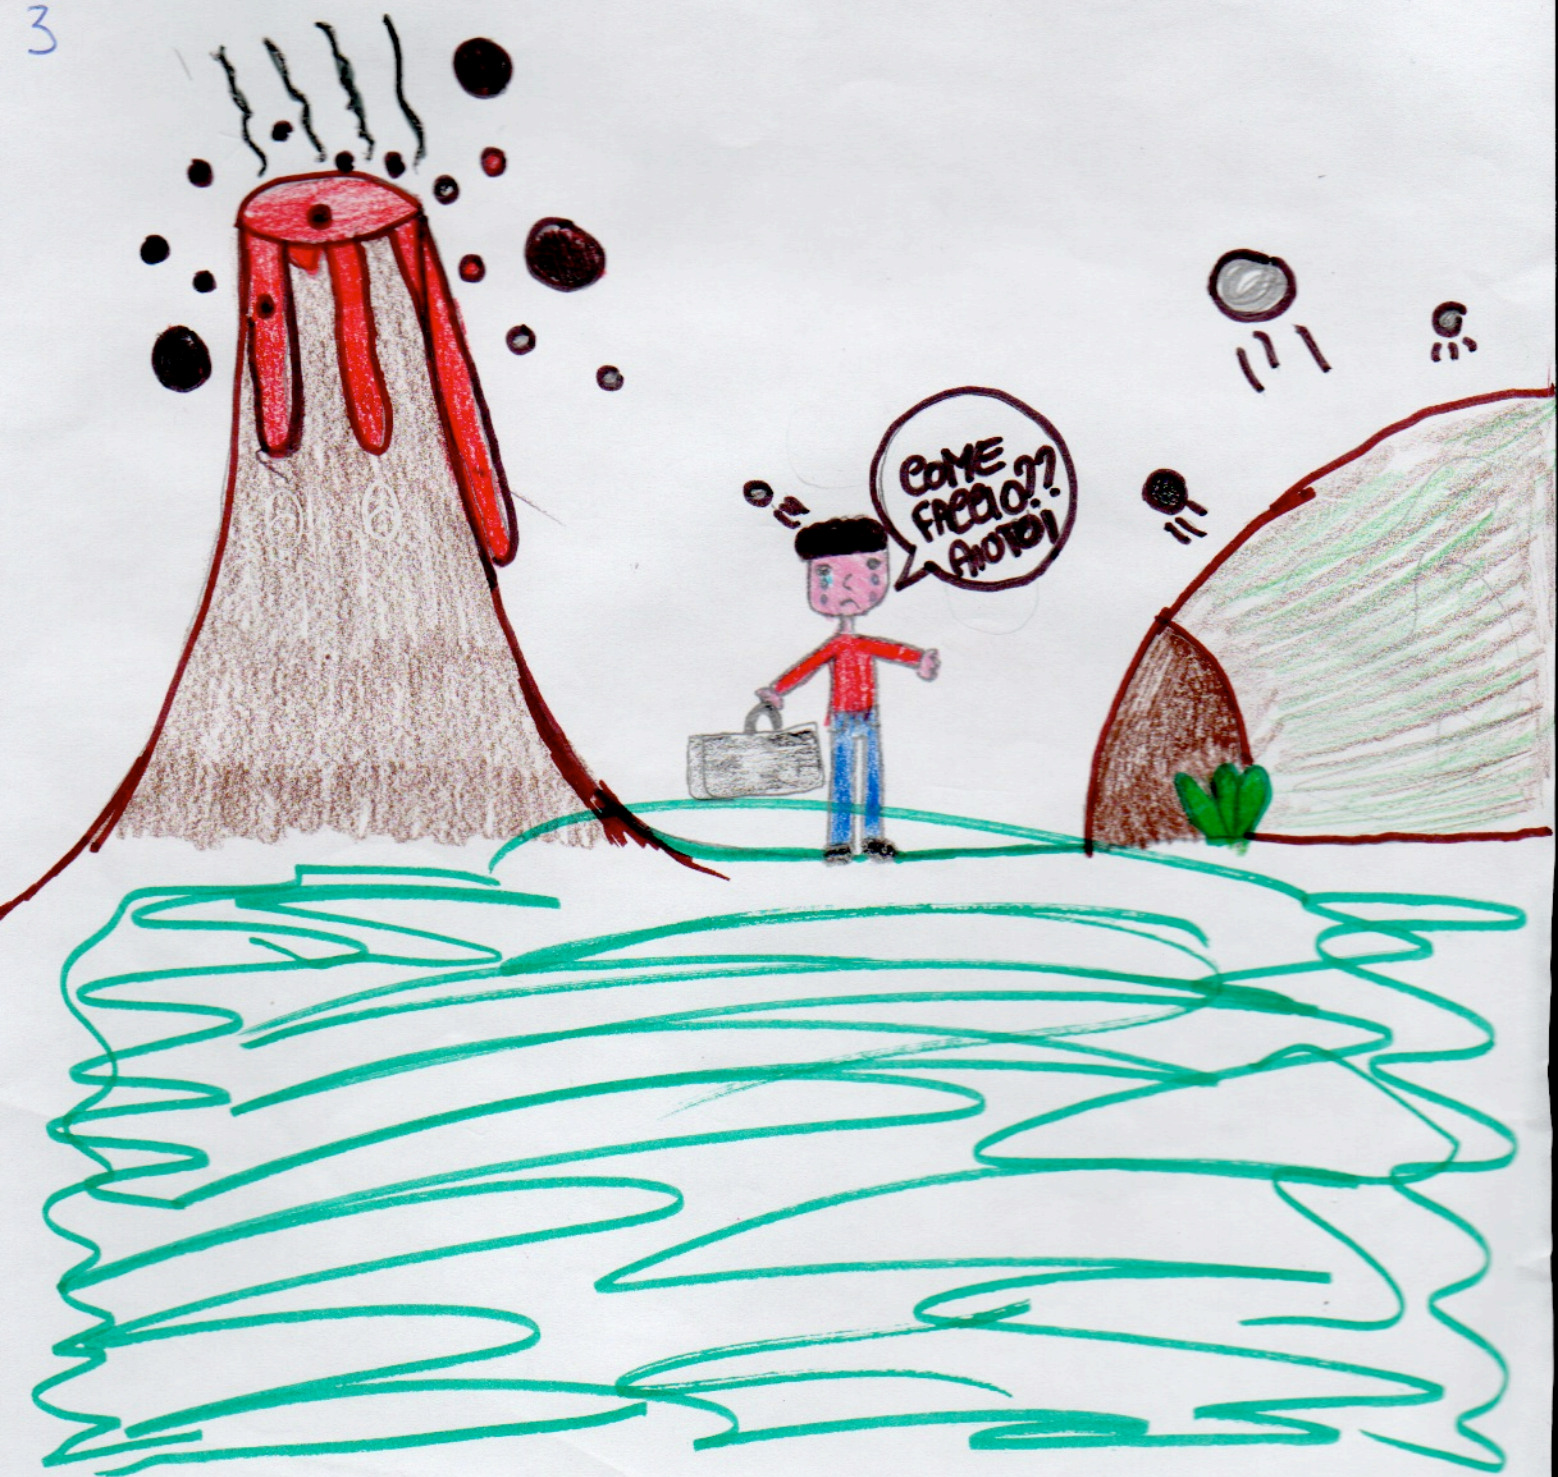

Viki non riesce a scappare perché il vulcano comincia ad eruttare e  
 cadono tante pietre grandi e piccole.  
 Viki comincia a piangere ha paura di morire il vulcano torna ad  
 essere marrone, tutto comincia a tremare e la capanna di Viki si  
 rompe quindi lui non ha <sup>più</sup> un rifugio.



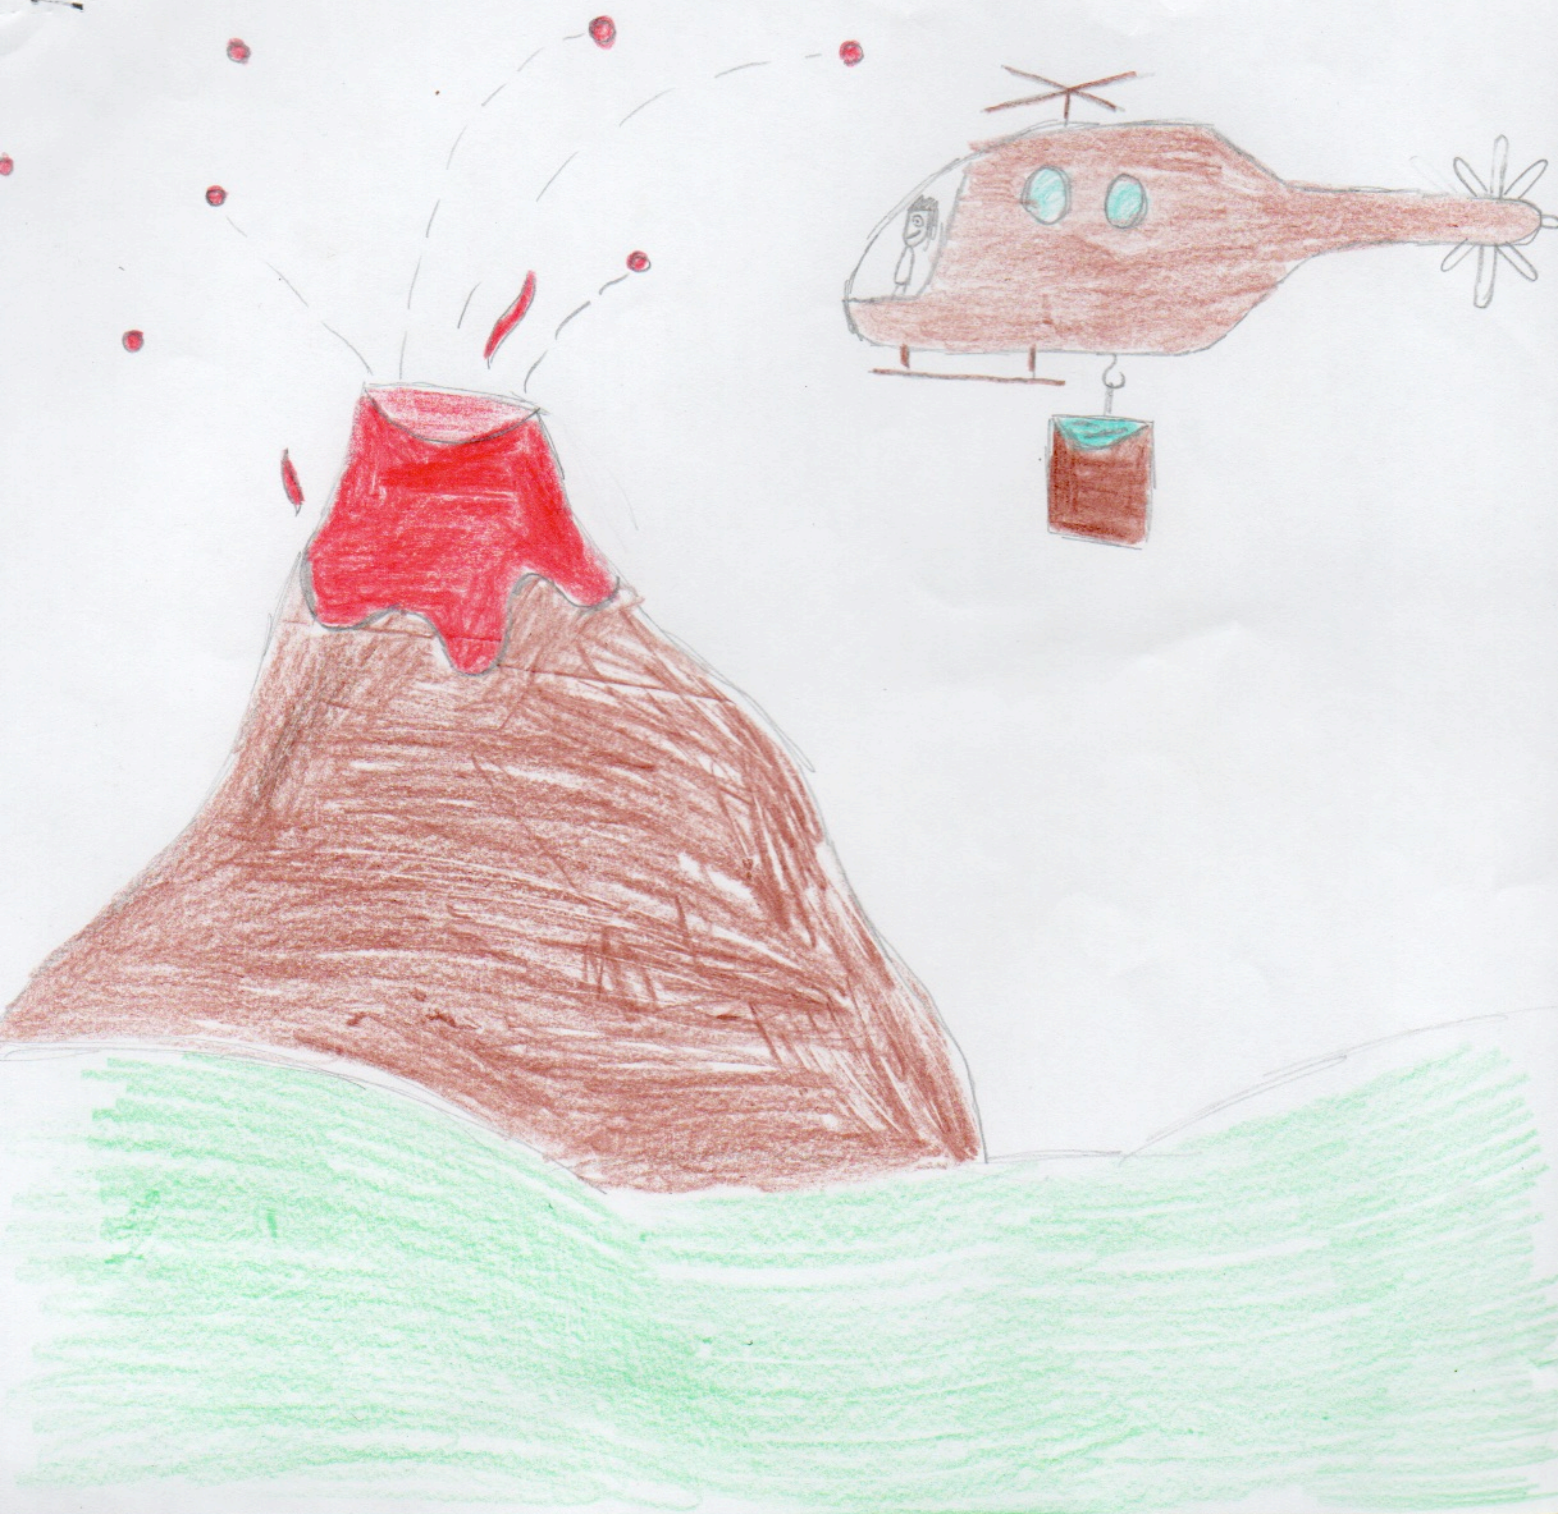

Ad un certo punto il vulcano eruttò, così Harry costruì in 40 minuti un elicottero di legno in modo da poter buttare ~~grazie all'elicottero e un cassonetto~~ <sup>un cassonetto</sup> pieno di acqua nel vulcano per spegnerlo.



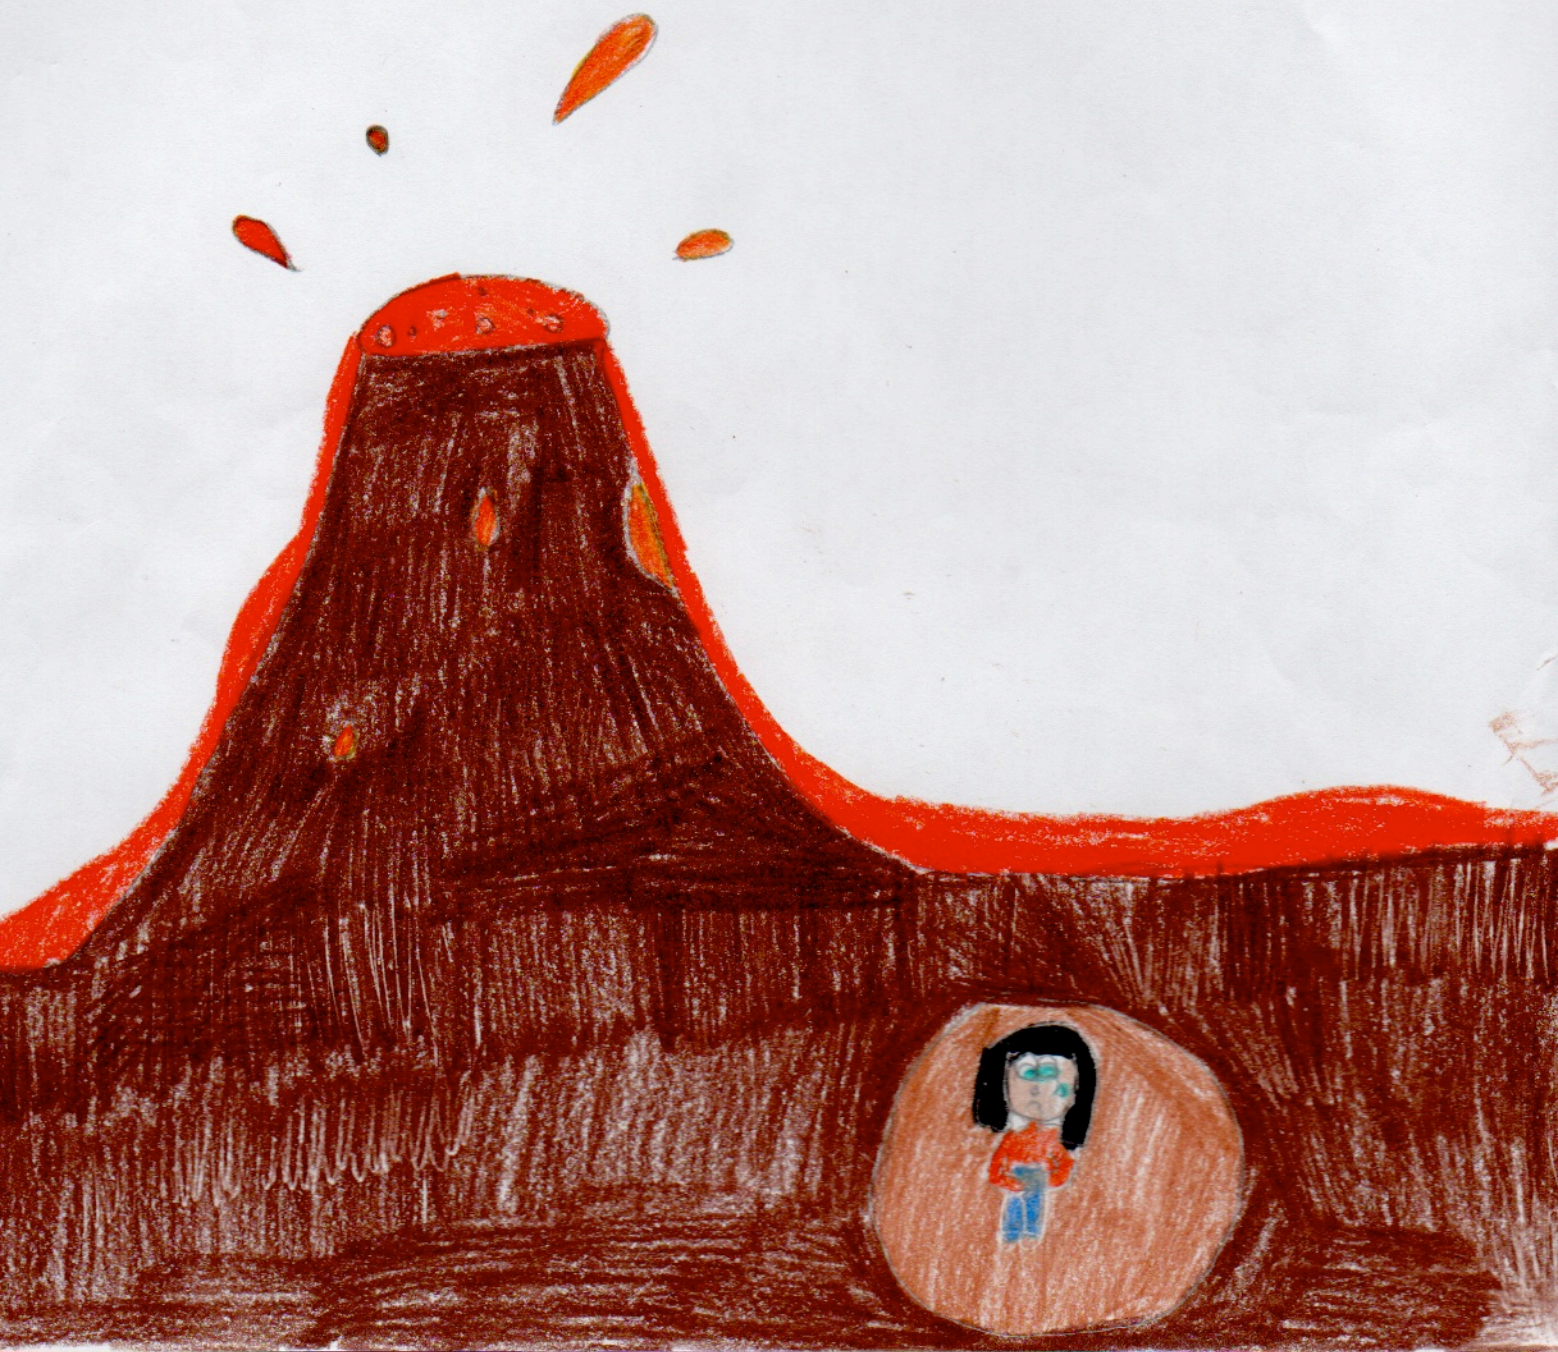

C'era una ragazza di nome Michela che aveva 13 anni ~~che~~<sup>ed</sup> era stata abbandonata dai genitori vicino un vulcano, l'anno dopo ci fu un'eruzione e la bambina per salvarsi si fece una buca sotto terra. ~~Per~~ Per fortuna si salvò dall'eruzione, però era rimasto solo lei. E aveva anche molta fame.



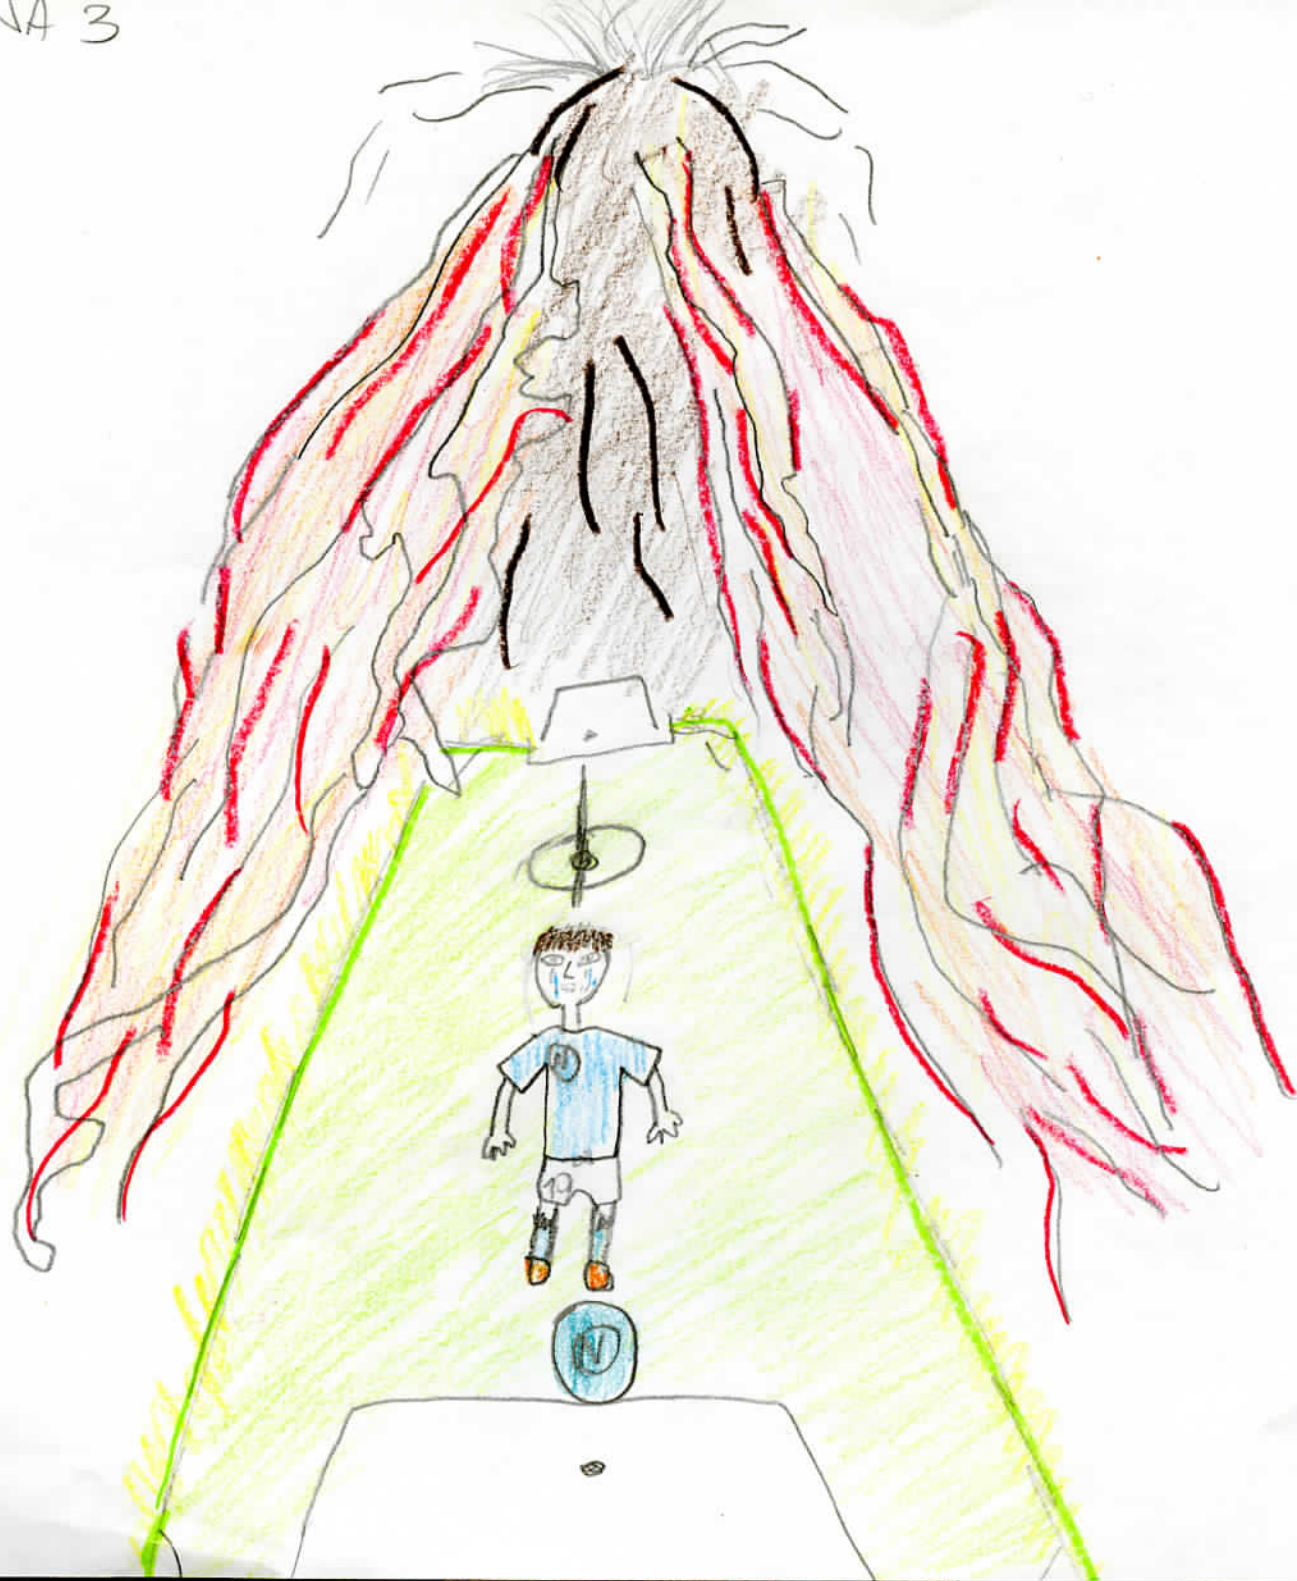

Scena 3  
Cito il giorno seguente prese il campetto e pallone e andò ad allenarsi. Ad un certo punto il Vesuvio eruttò. Il ragazzo disperato continuava a giocare fregandosi della lava che usciva dal vulcano. Tutta la gente fuori dal campo a scappare e invece Cito era se nel campo. Il campetto è come se fosse miracolato perché il campetto non venne inghiottito dalla lava.



SCENA 3

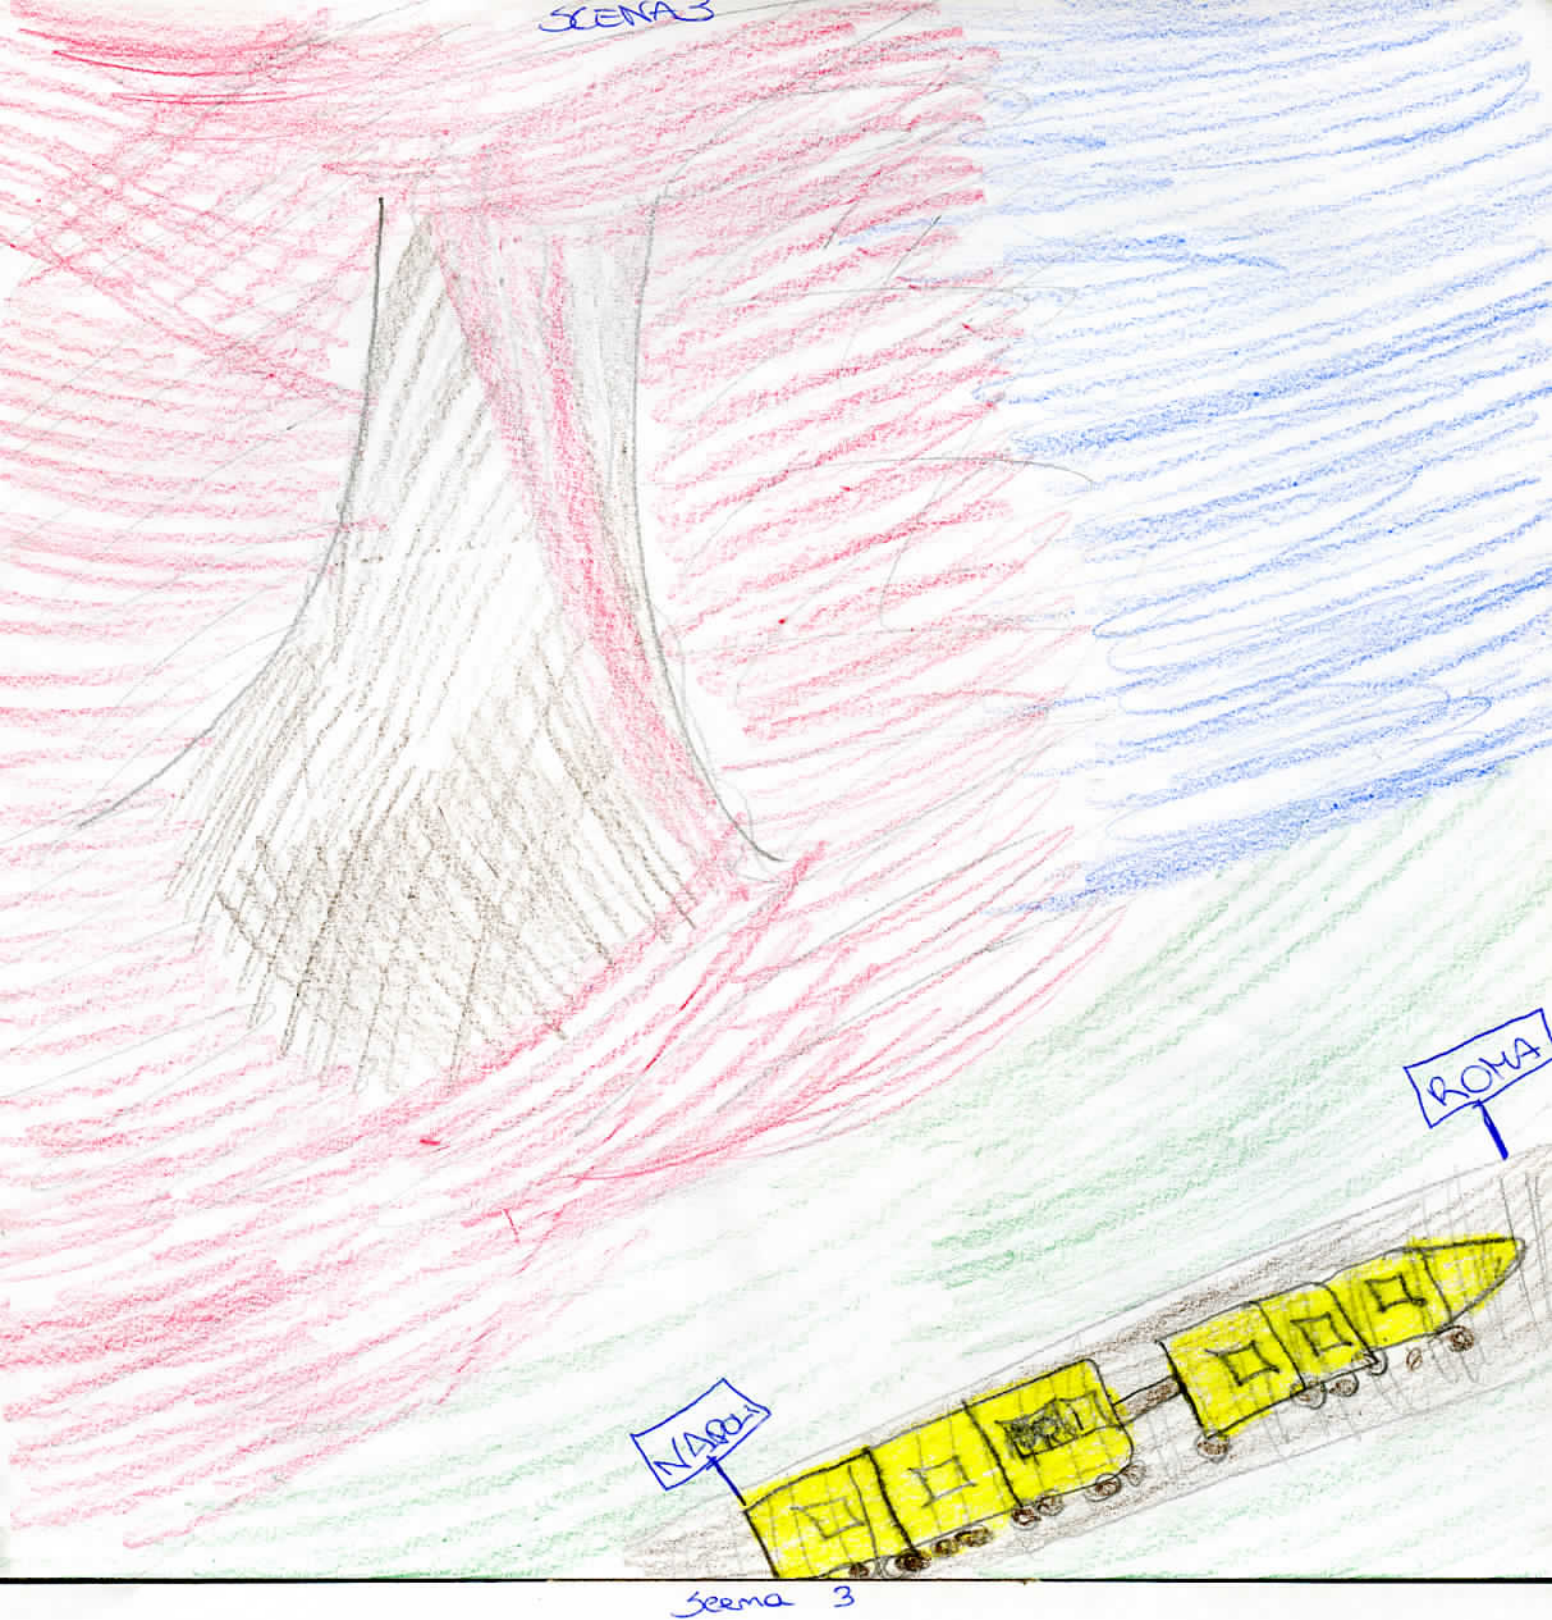

Nadia scappa con l'amica per andare a rifugiarsi.  
Vanno nella ferrovia, prendono il treno ed aspettano  
la fermata più lontana. Roma. La città è piena di  
cava. E la casa di Nadia si bucia



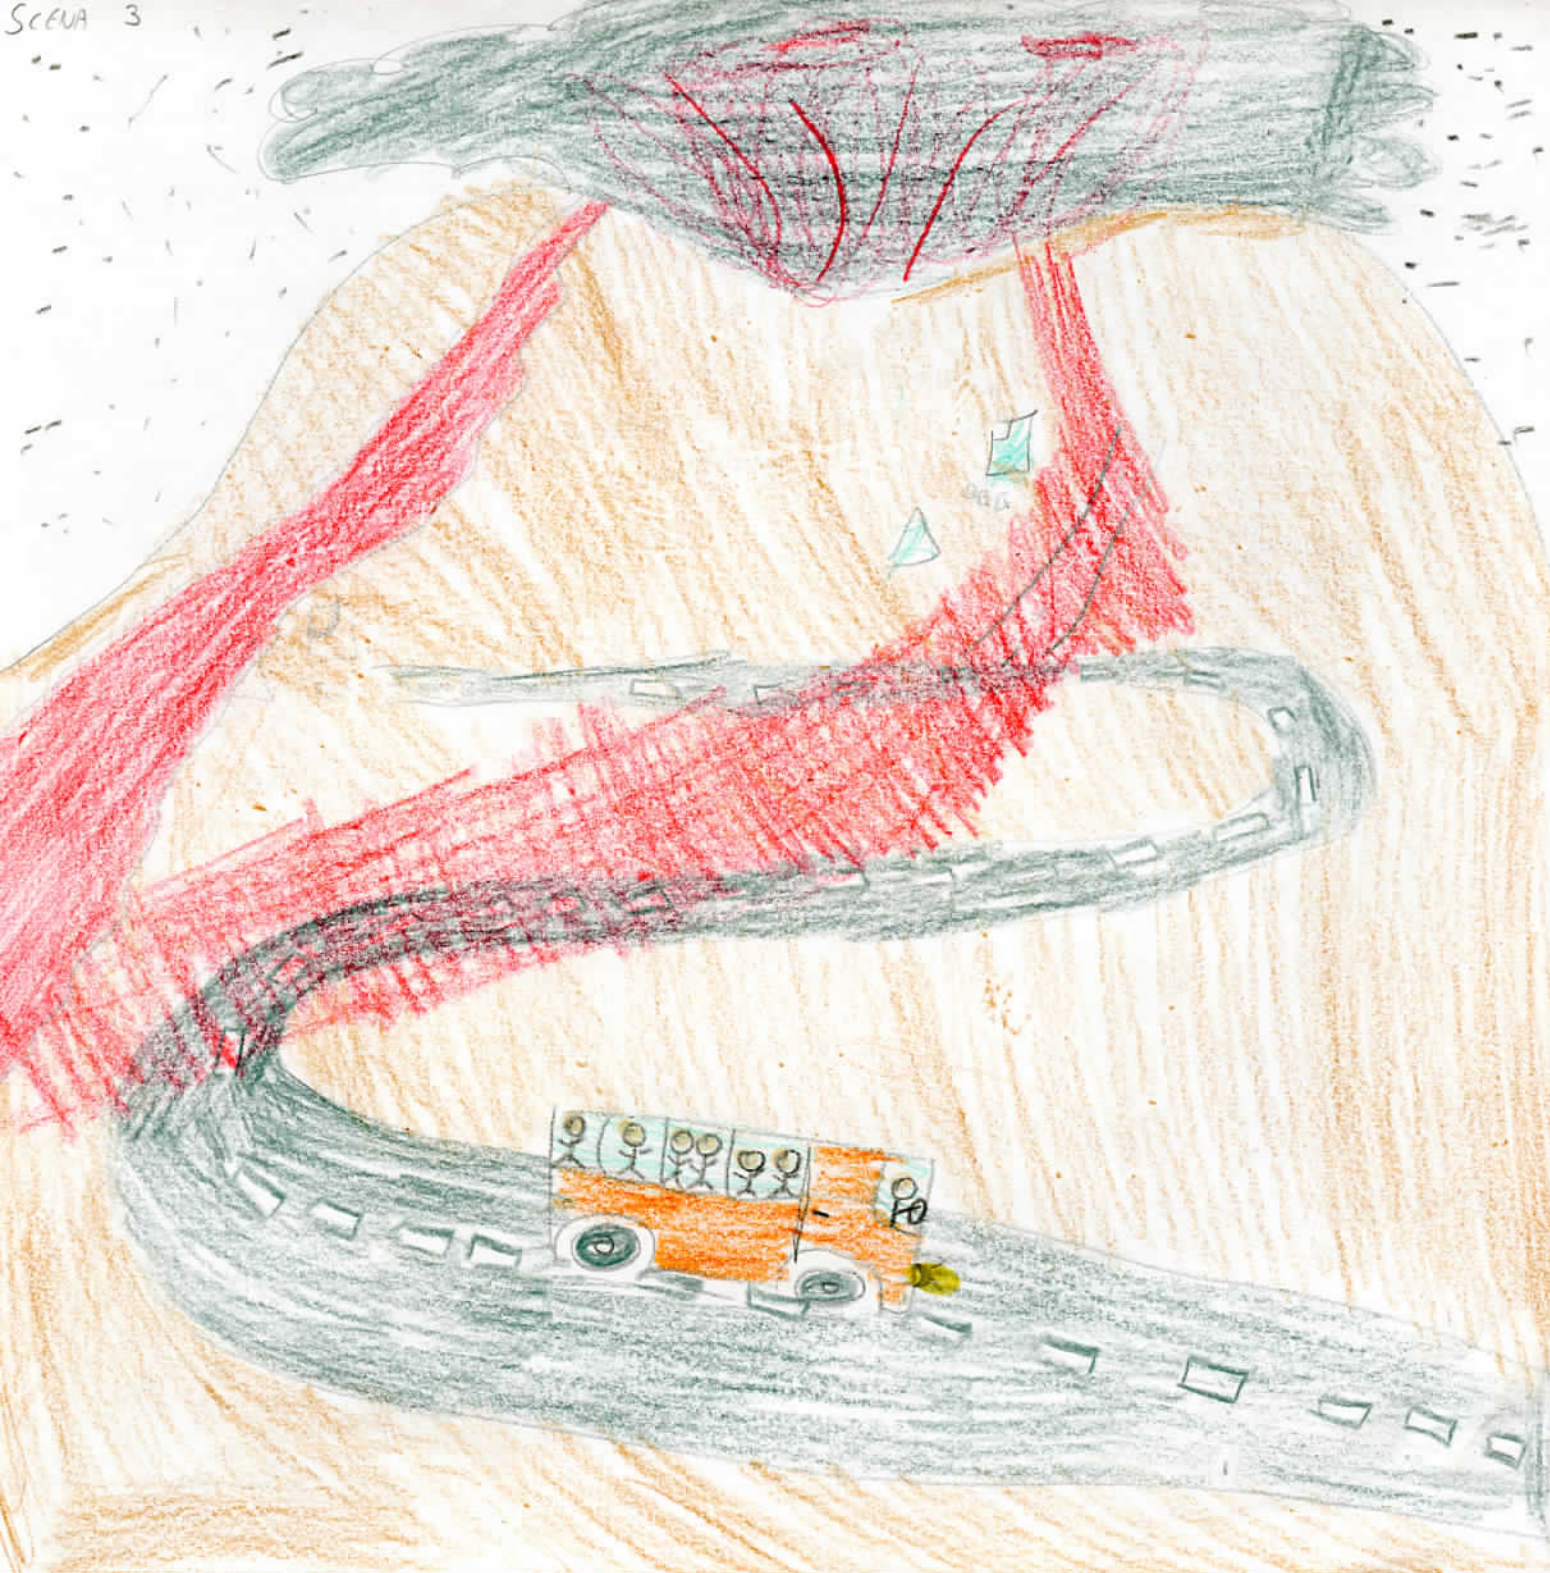

SCENA 3

Paolo e Stefano corrono a salvare la persona con la casa terremotata e salvano la stradina del vulcano con il loro pulmino. Il vulcano erutta dal tetto e si vede un fiume di lava scendere dal monte. I due si dirigono verso il porto e cercano una barca funzionante.



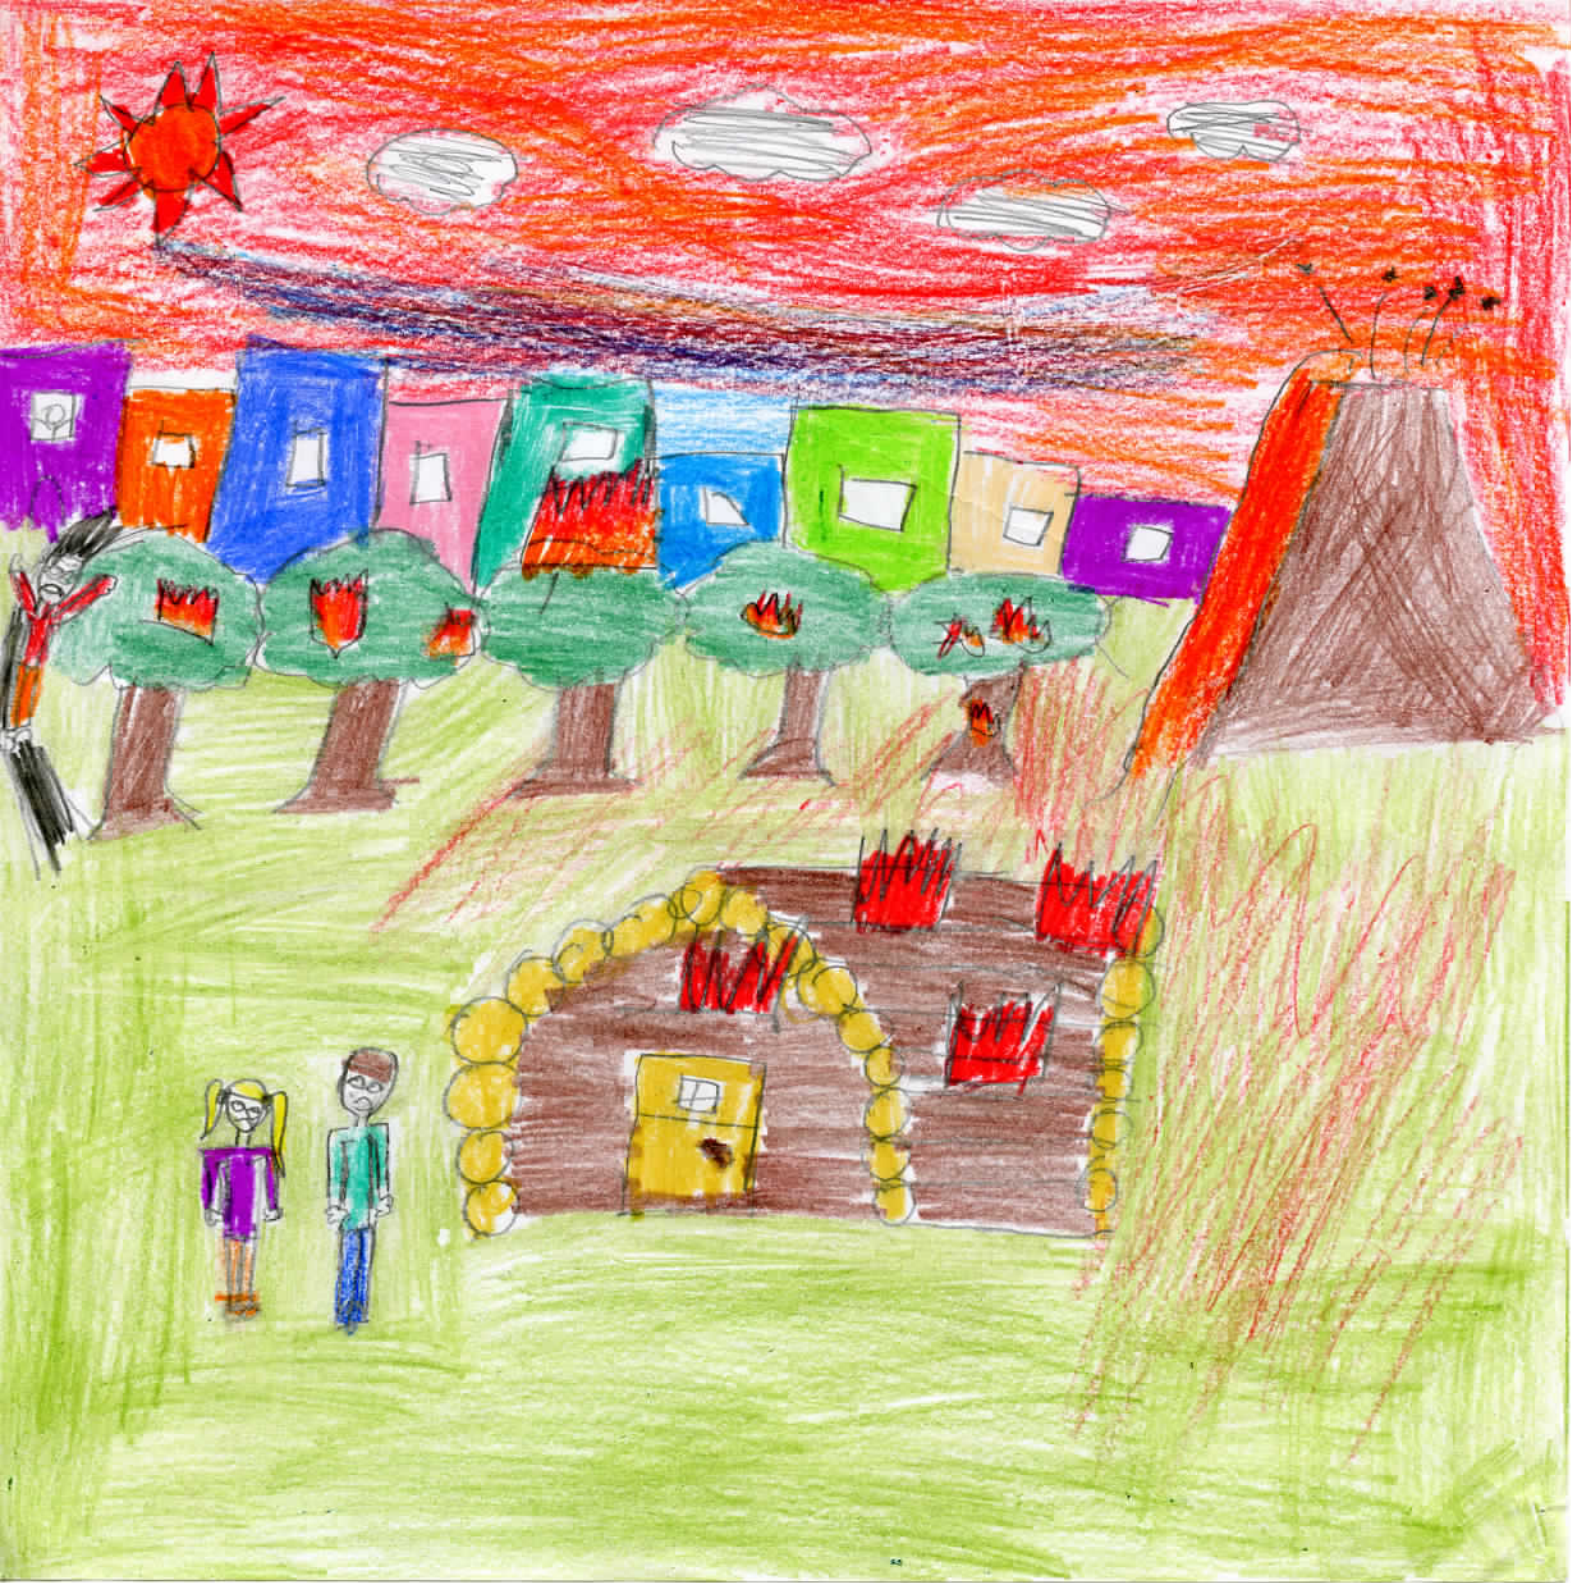

Vedono il vulcano e d'improvviso: BOOM! Il vulcano non si può trattenere esplose e de li uscì una sostanza calda, oronione, che bruciava... LAVA! Gli altri si infiammarono e tutti gli abitanti delle città corsero da loro. (Orche le loro cose ve a fuoco e scoppiano di cose)



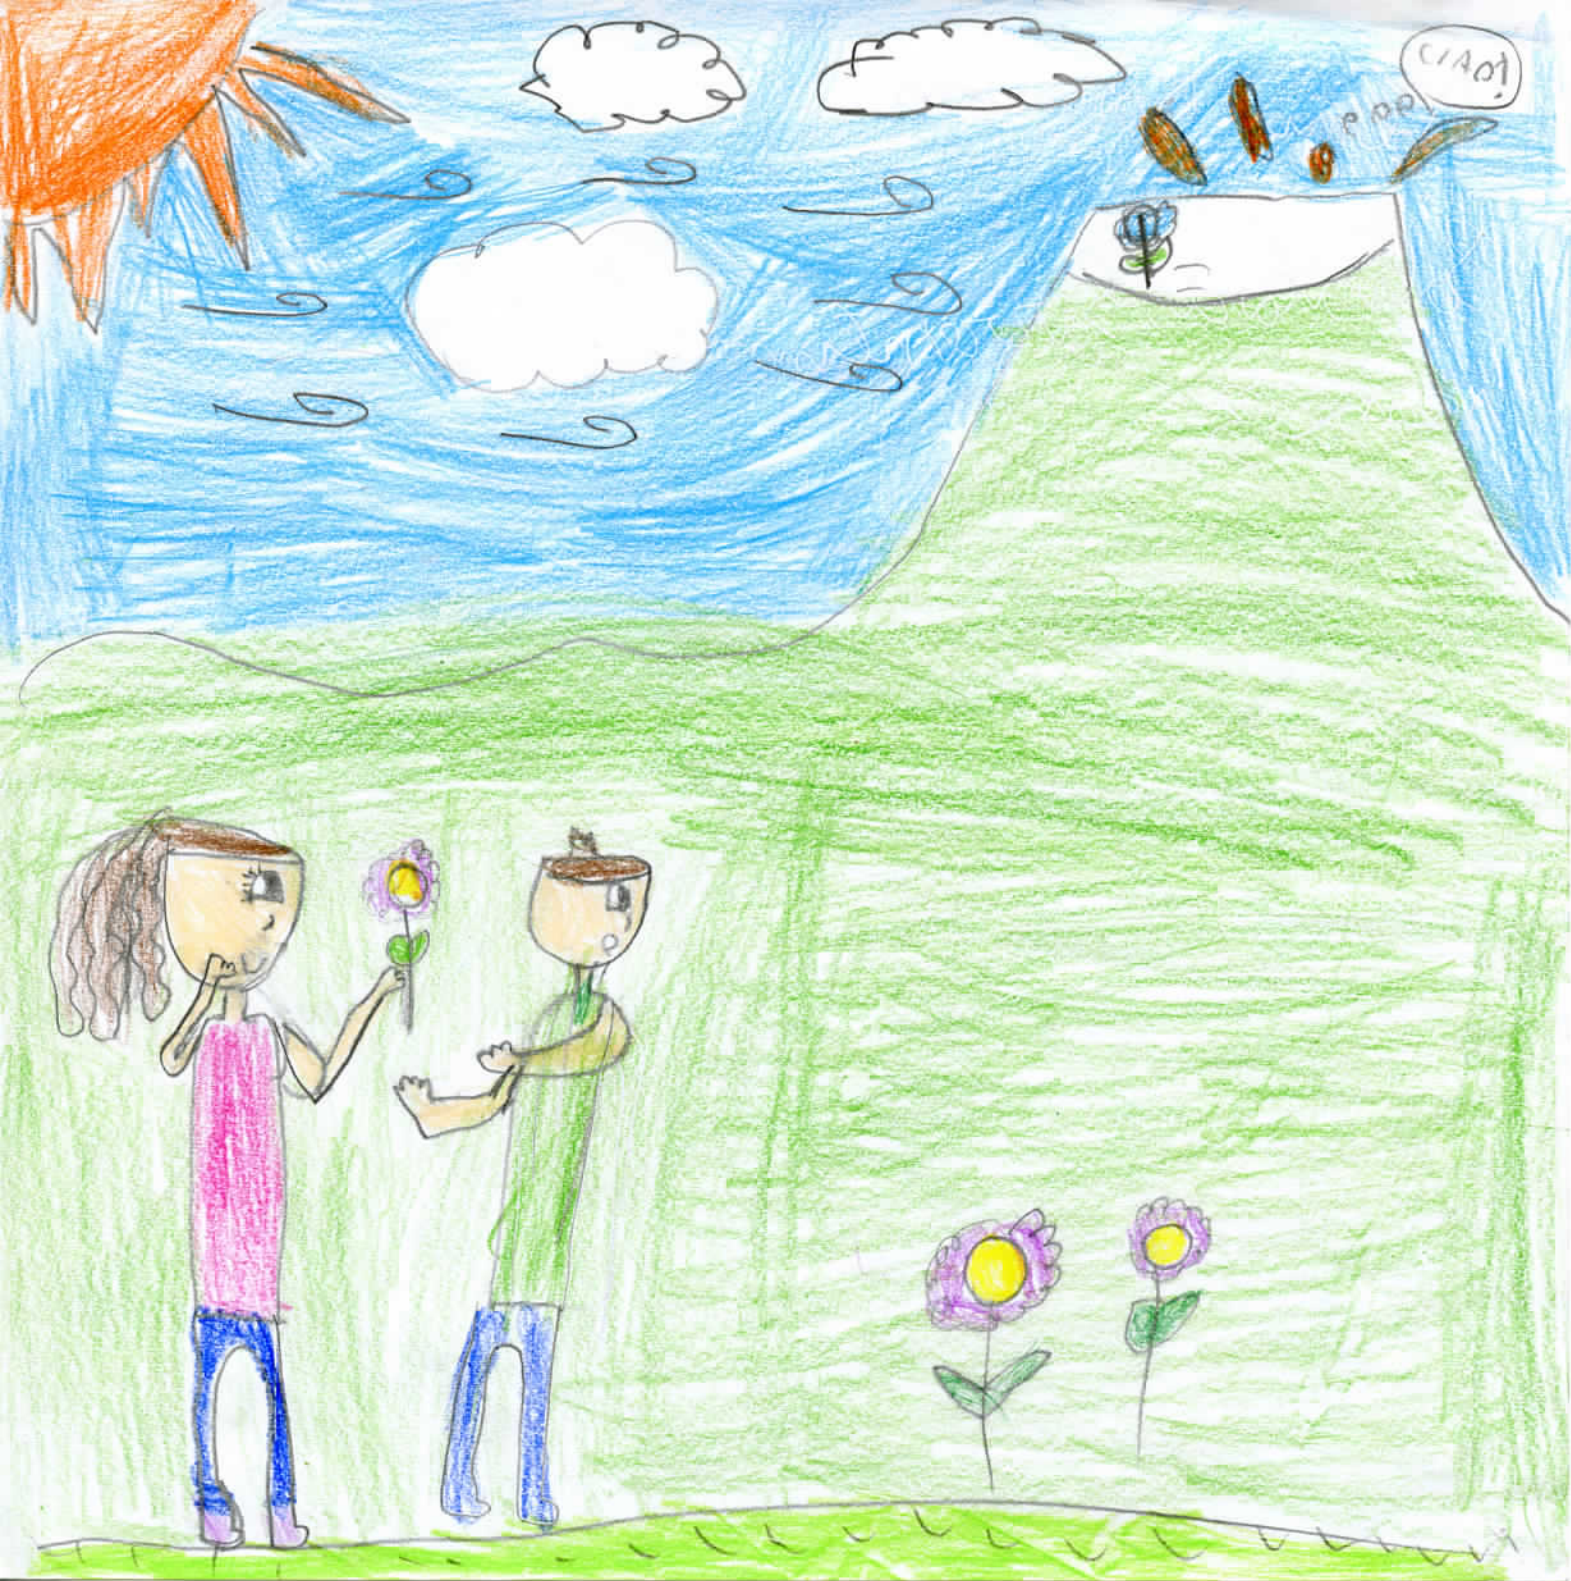

Il vulcano iniziò a cacciare un pó di lava e poi fiori, Anna non voleva più scappare perché ormai aveva capito che il vulcano era buono. Il vulcano iniziò a dire una parola: "Ciao" Frank a quel punto si spaventò e andò subito in casa.



Scena 3

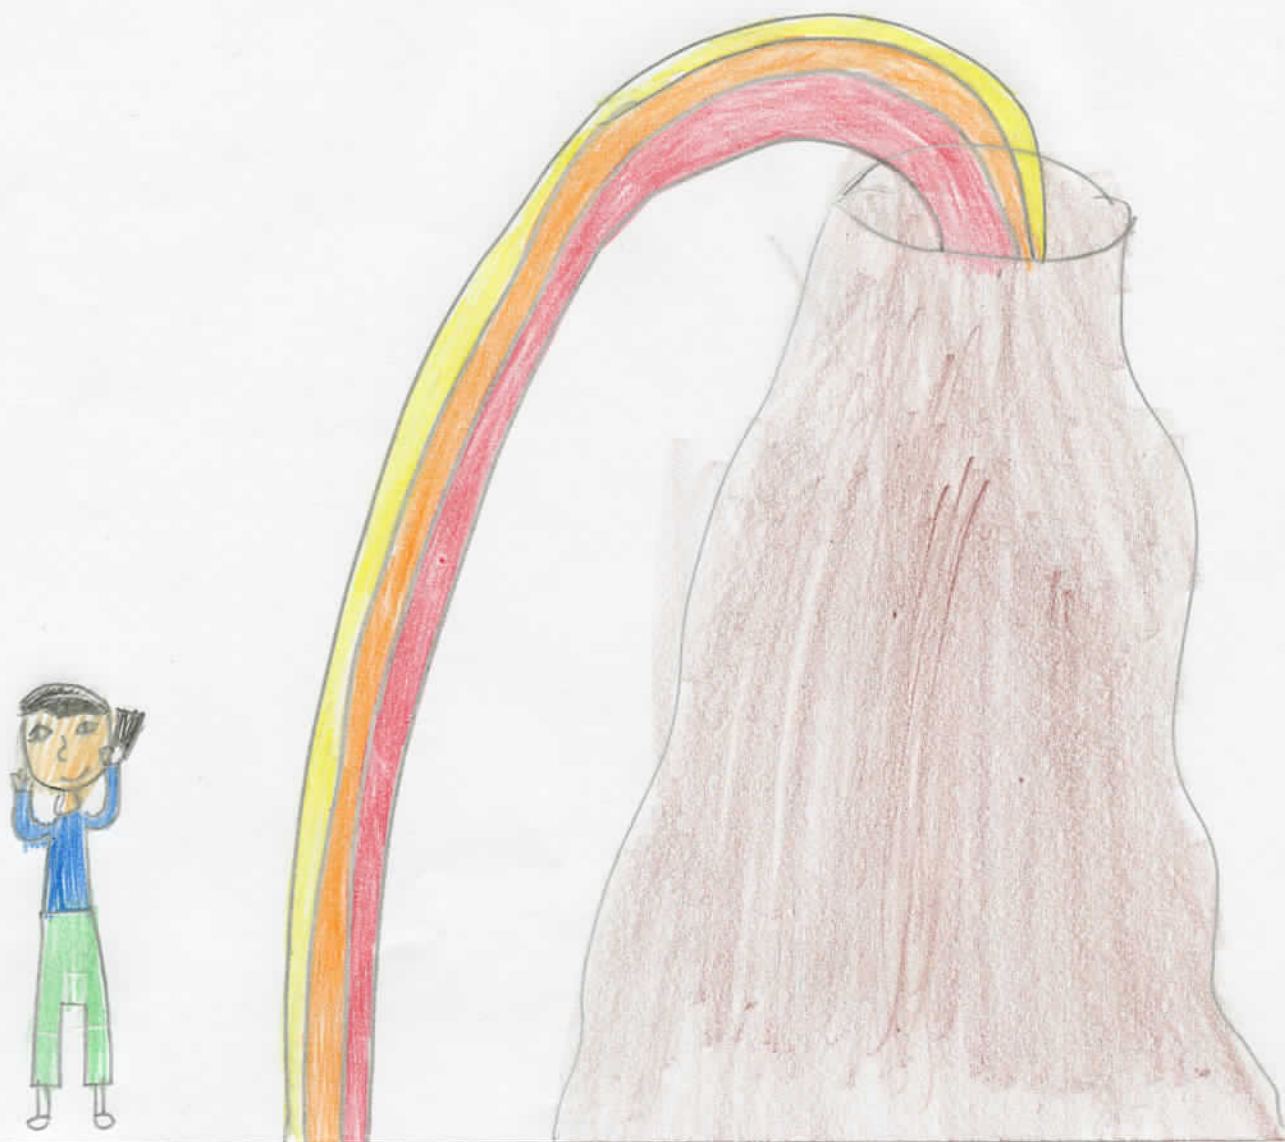

Scena 3

Il vulcano erutta e Harry nota qualcosa di strano perché la sua casa non si è ancora incenerita, ma dal vulcano escono degli arcobaleni ed Harry fa un video per mostrarlo al suo amico



Scene 3

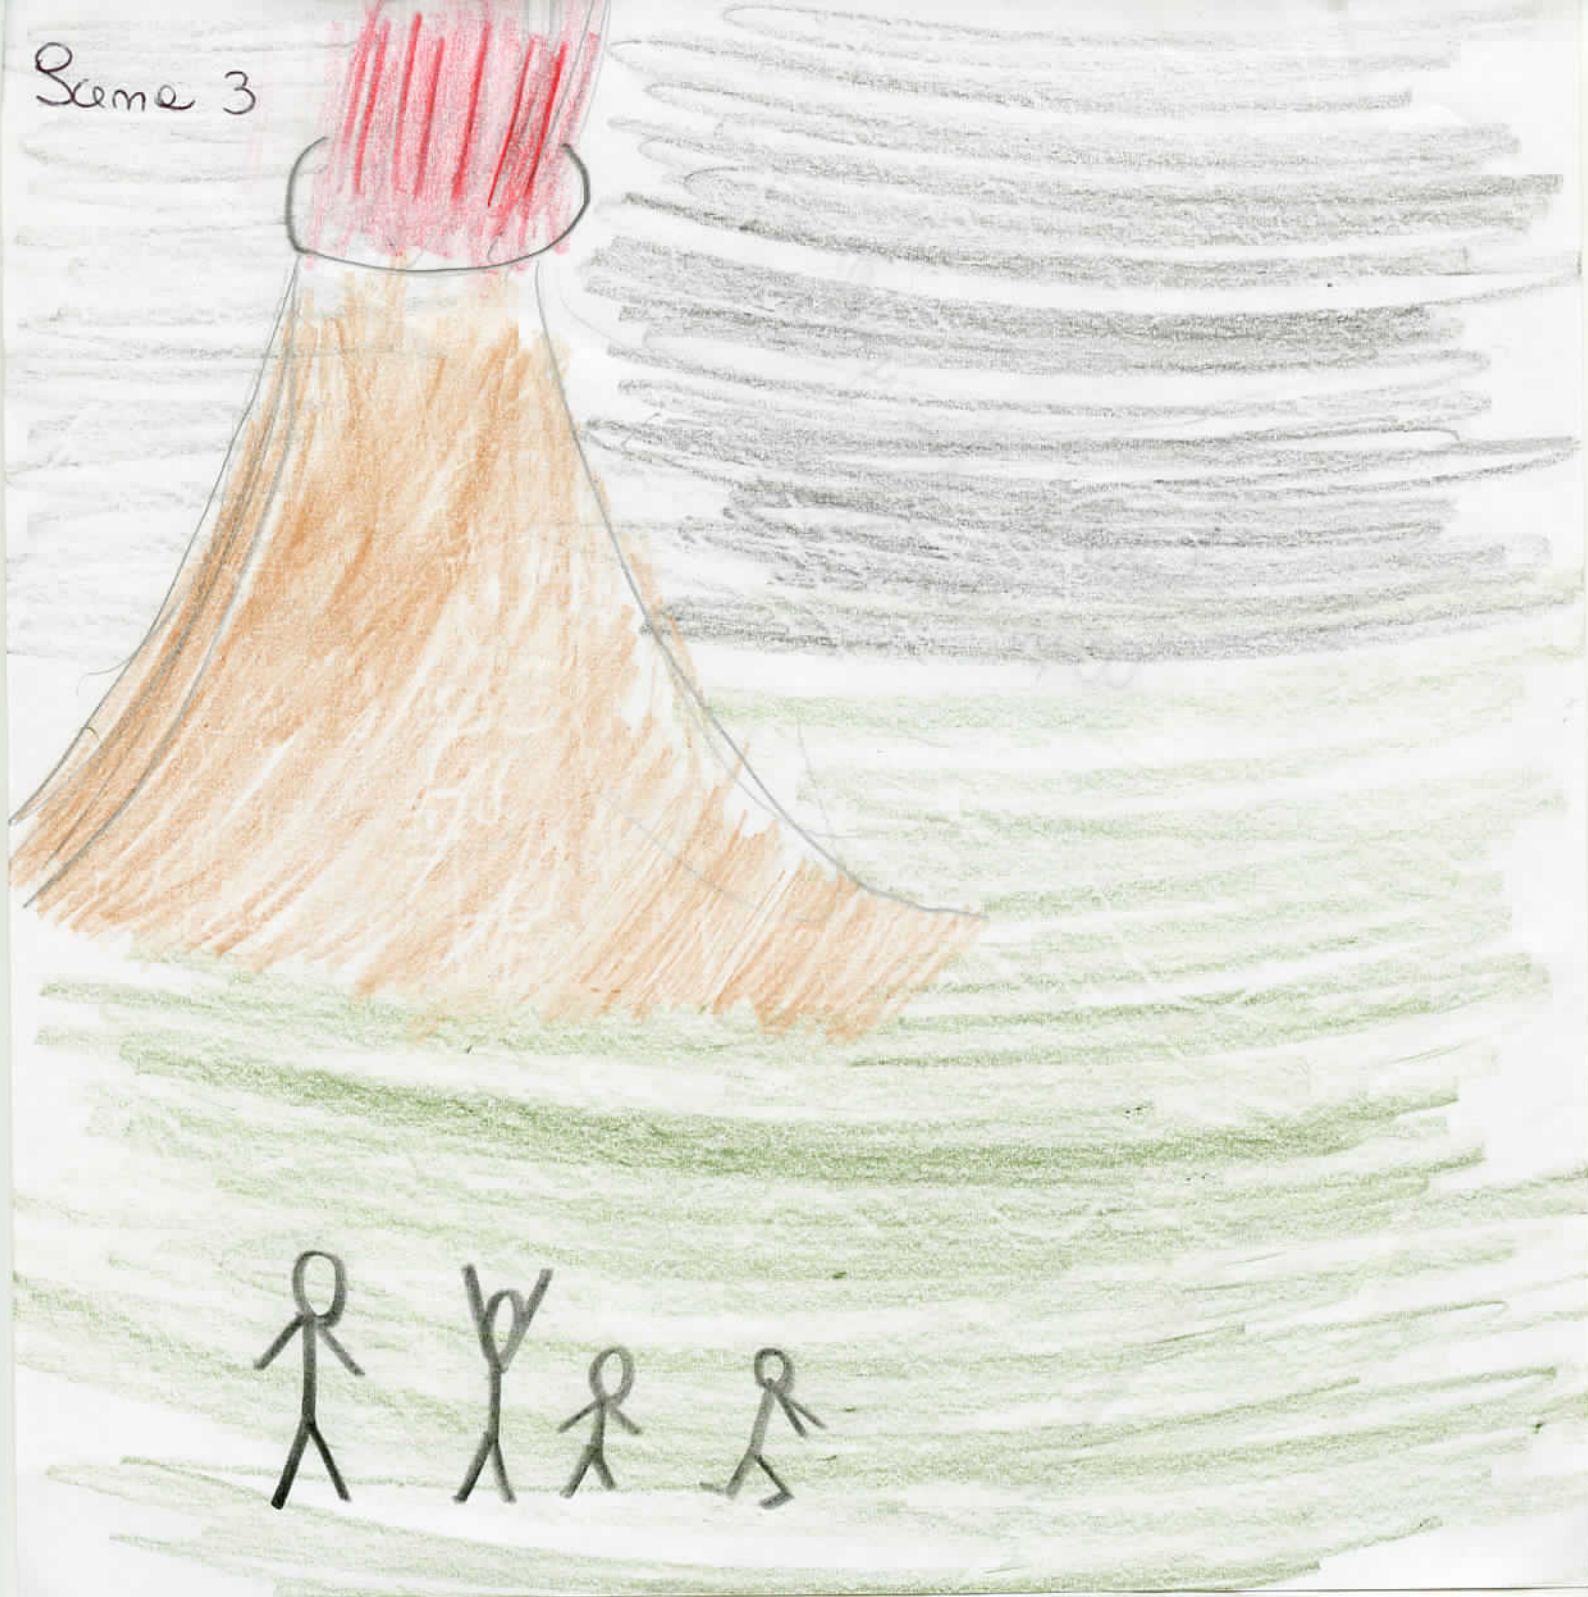

Scene 3

All'improvviso il vulcano eruttò e tutti i cittadini si spaventarono e scapparono in un altro paese di nome Mussini.



Scene 3

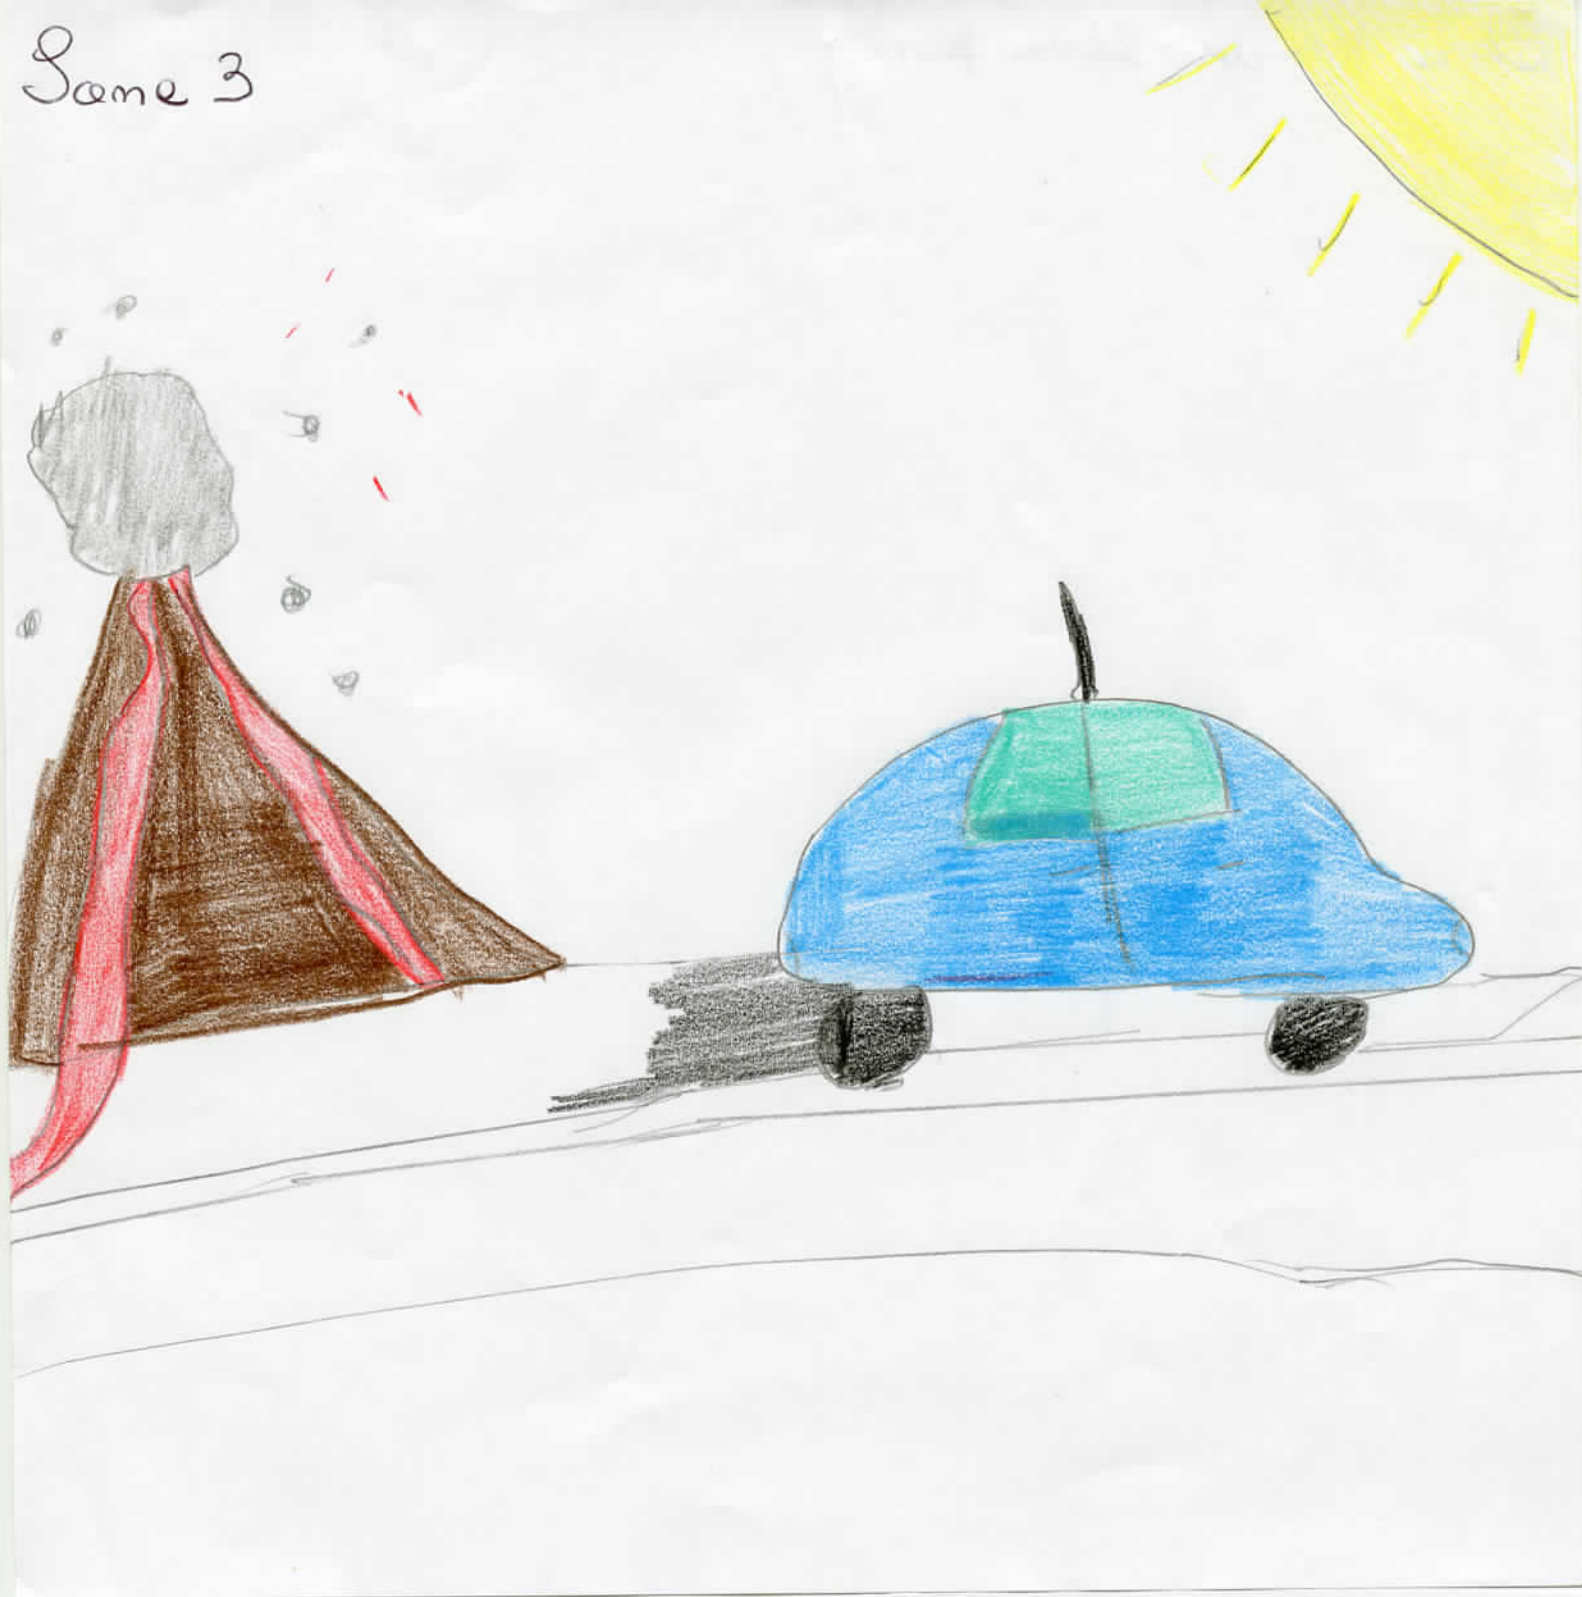

Scene 3

Luise sente un boato improvviso e lo disse alla mamma. Allora Luise e la mamma uscirono fuori per controllare. Videro il vulcano esplodere e si ripararono in macchina.



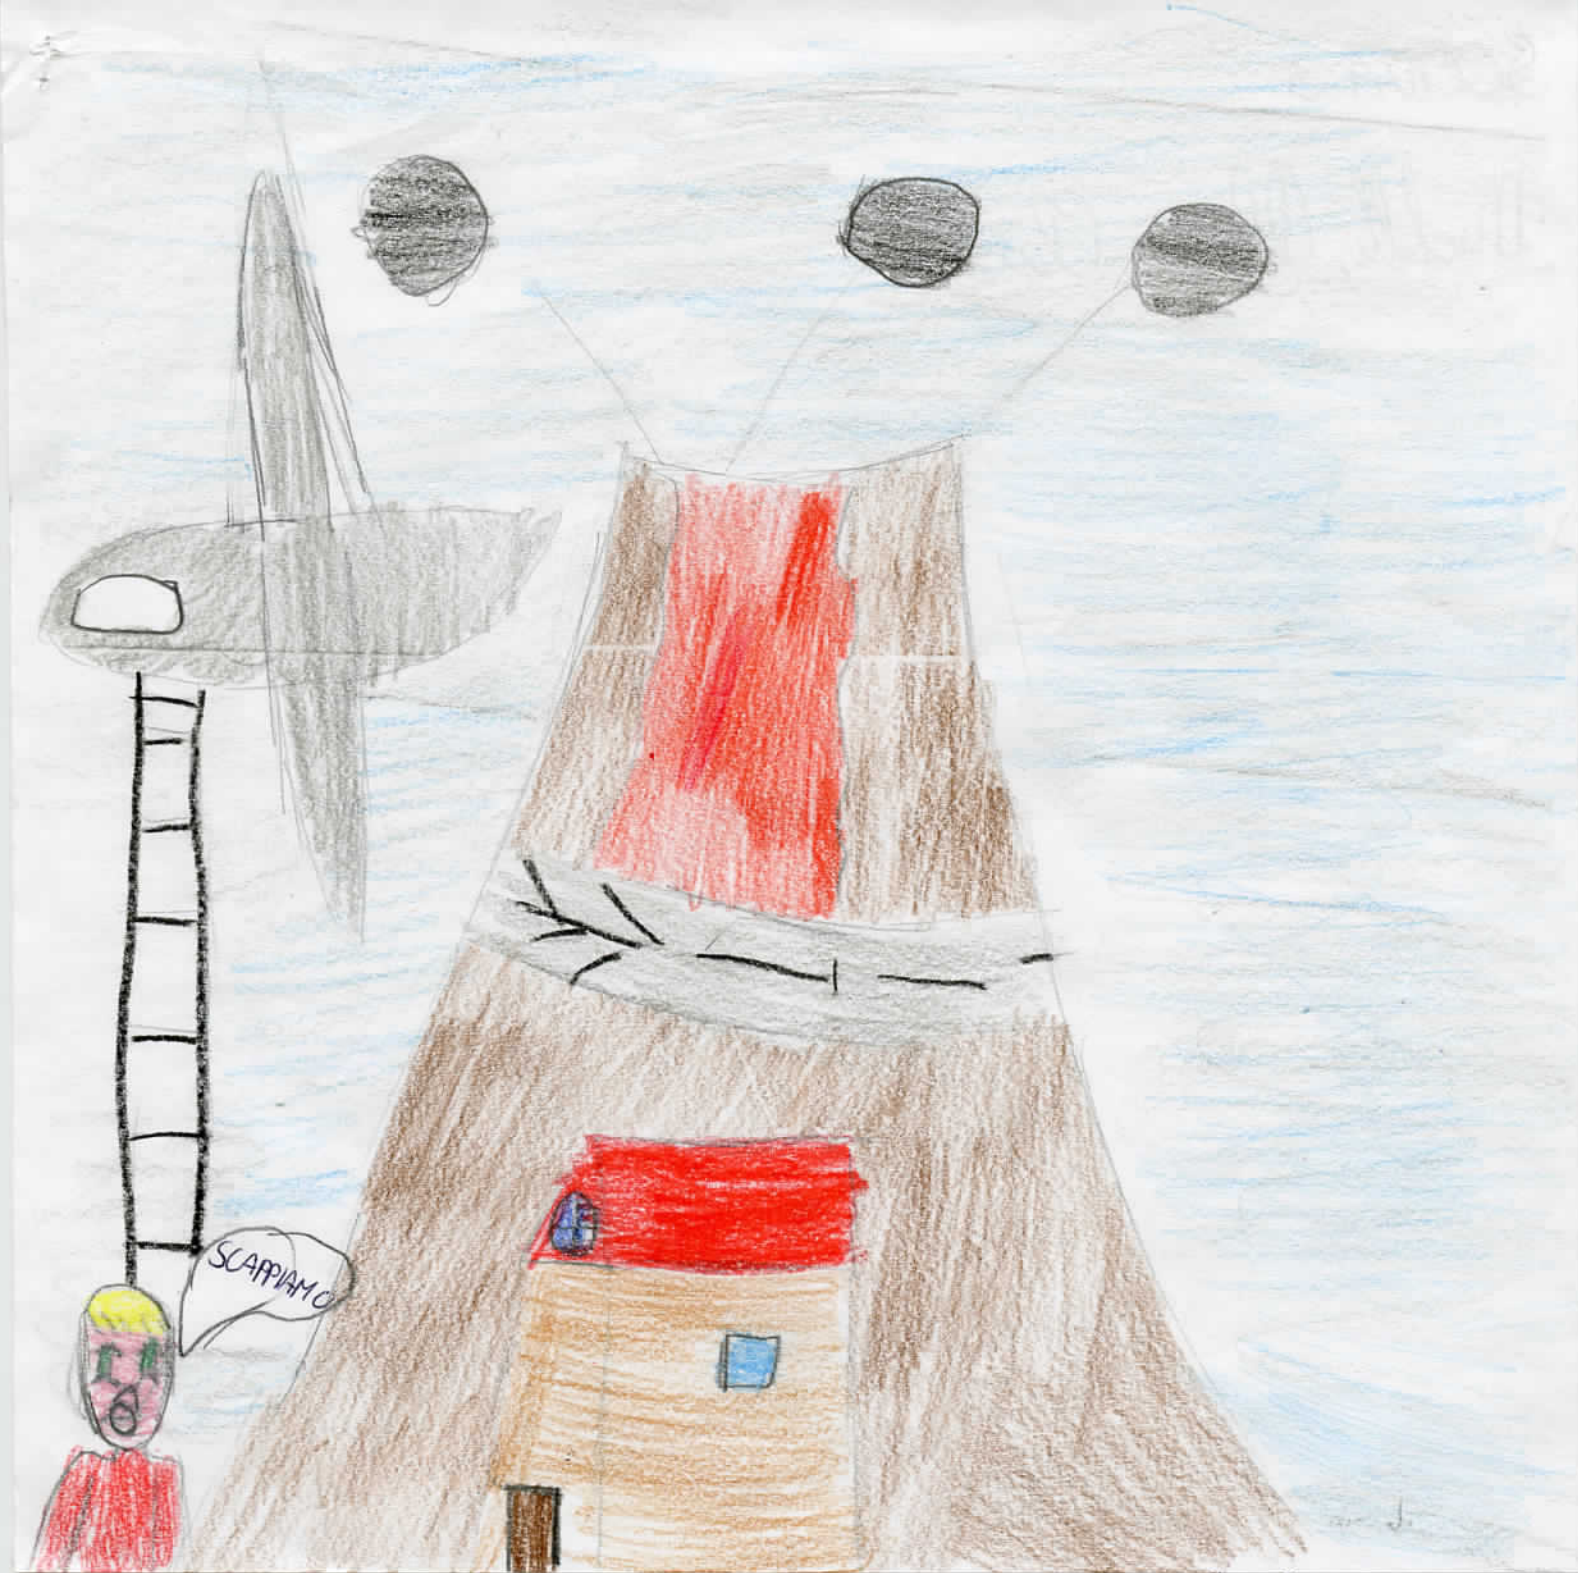

Riccorolo avverte gli altri cittadini perché lo loro stava  
per raggiungere il paese, proprio in quel momento arriva  
un aereo per salvarli lui e tutti i cittadini.

SCENA 3



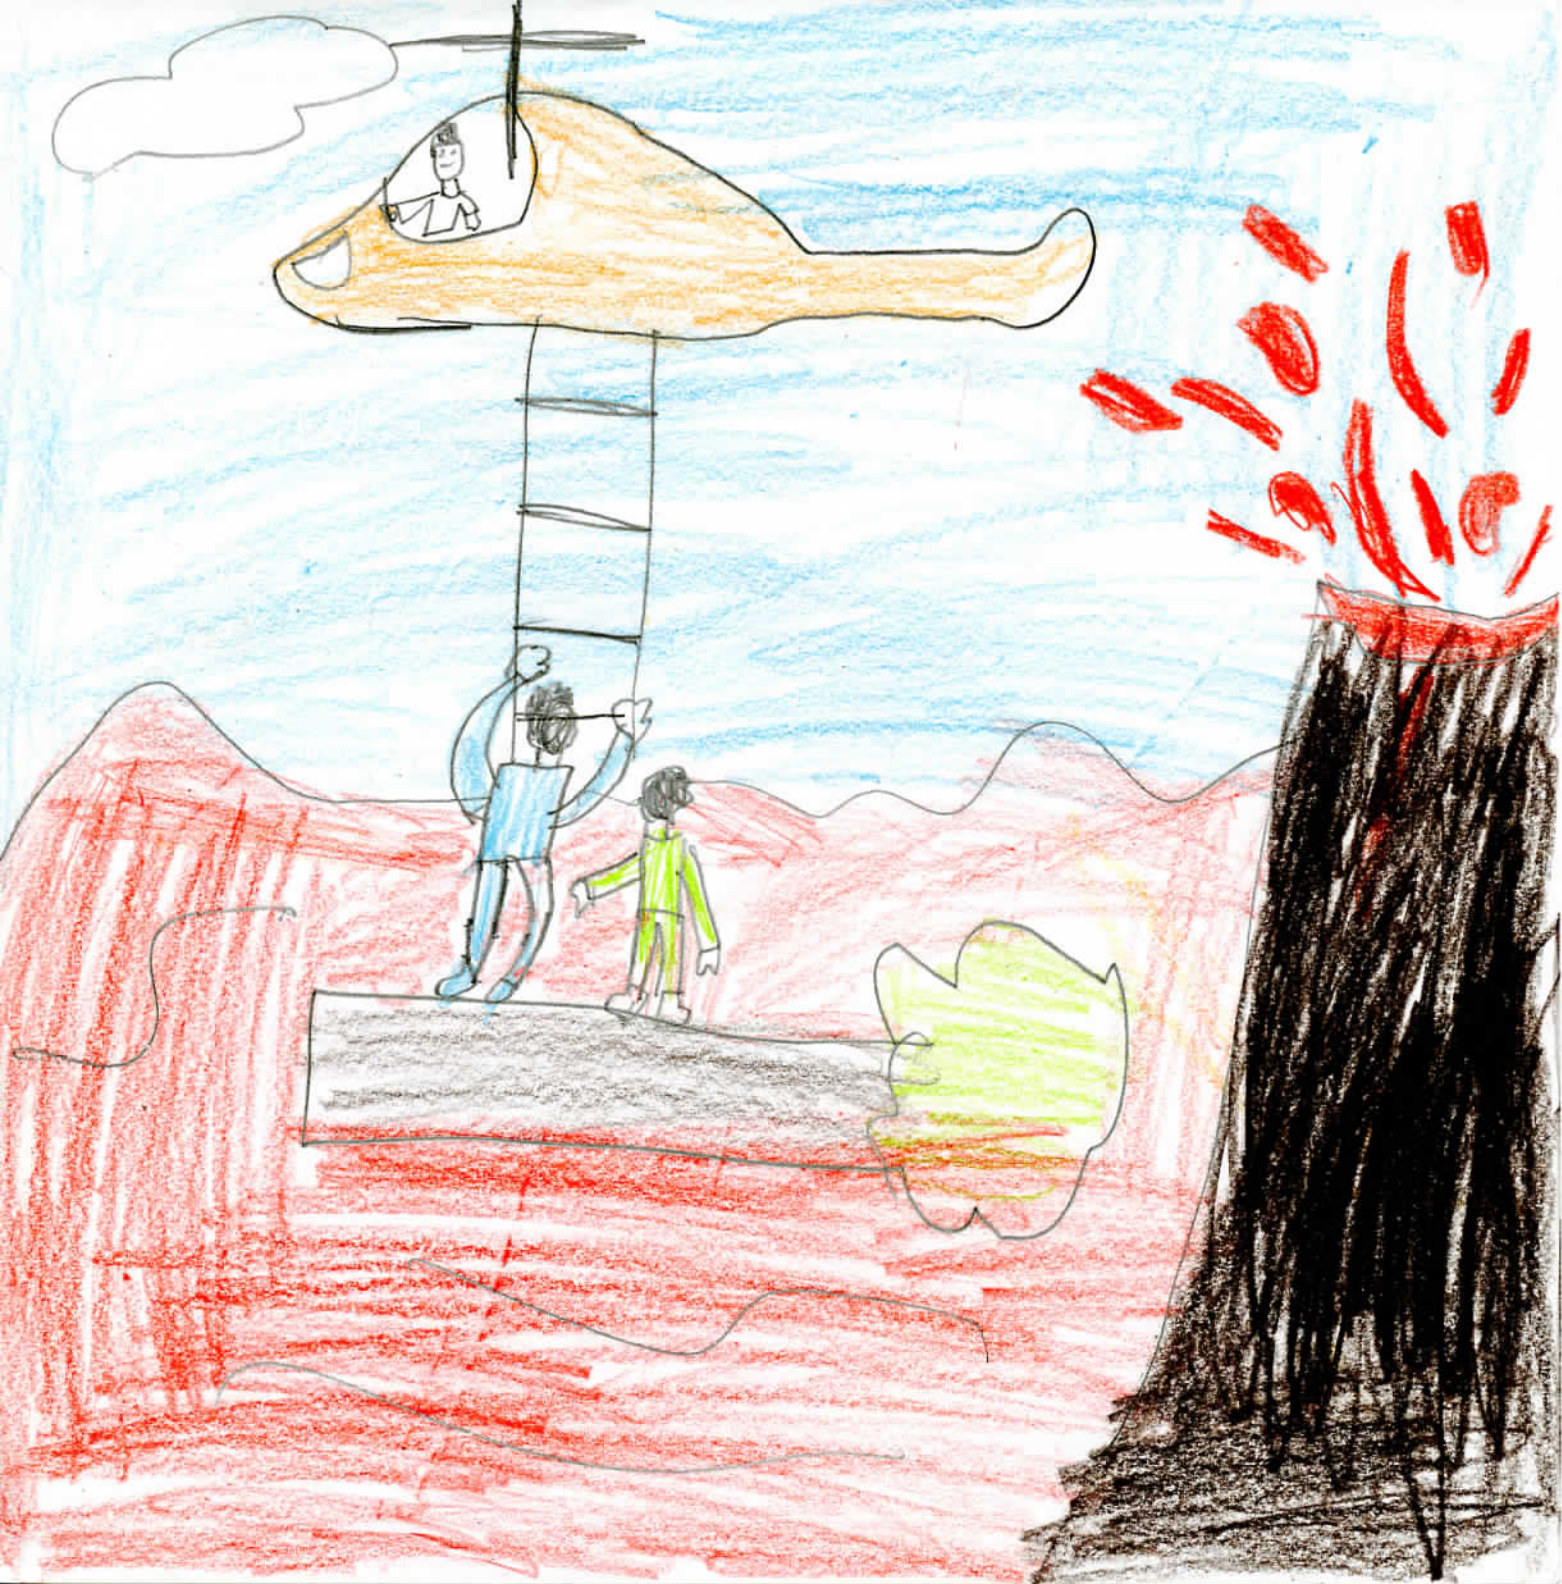

SCENA 3 FLAVIO JONATHAN  
FLAVIO E JONATHAN VE PONO LA LAVADA APERTUTA  
ED ERA VICINO ALLA CITTA MA VENE  
UNALTRA PERSONA. A AIUTARU CON UN  
ELICOTERO.



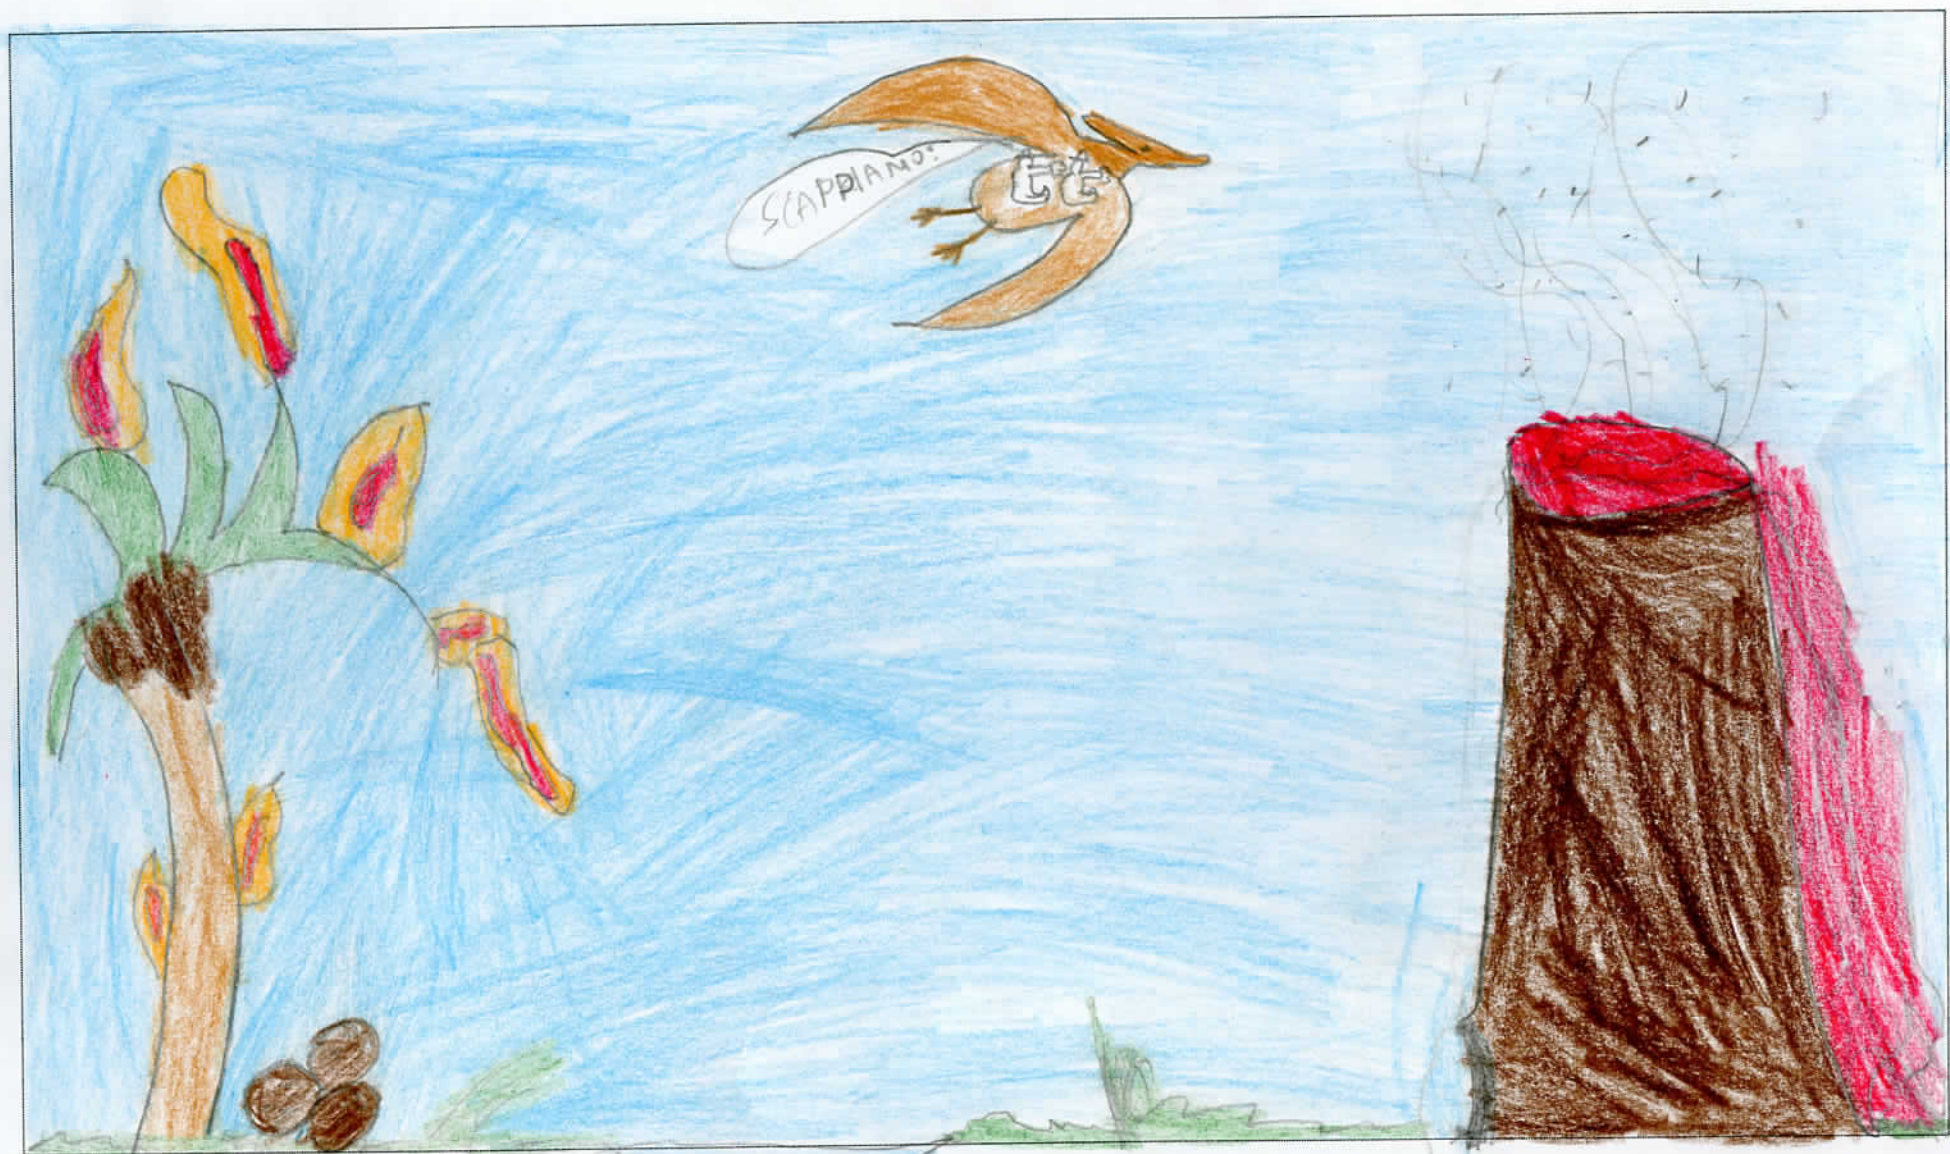

SCENA 3: L'eruzione - E APPENA IN TEMPO ARRIVARONO MOLTO IN ALTO  
PERCHÉ STAVA USCENDO TANTO IN FRETTA.



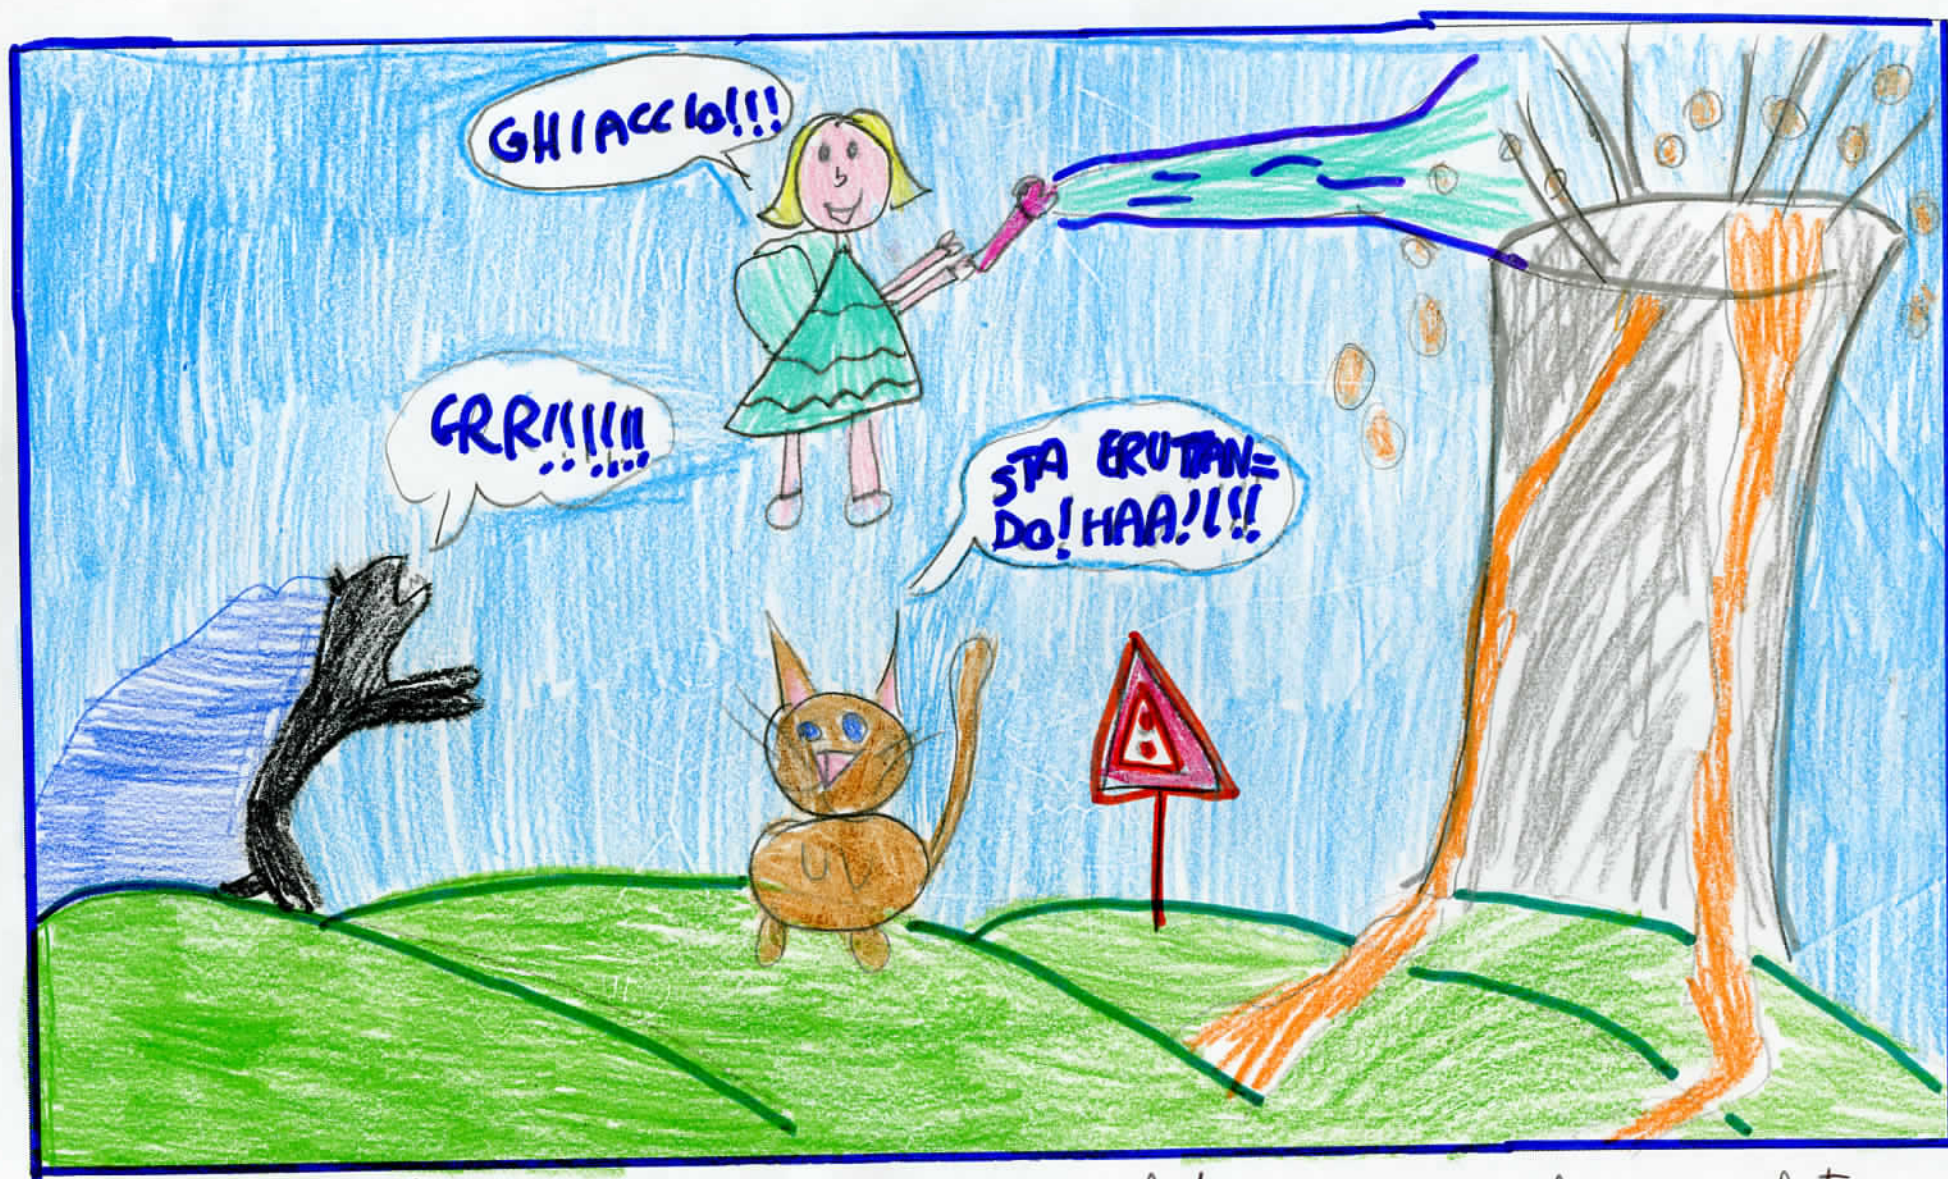

SCENA 3: L'eruzione - il vulcano erutta e fatina lo gela completamente.



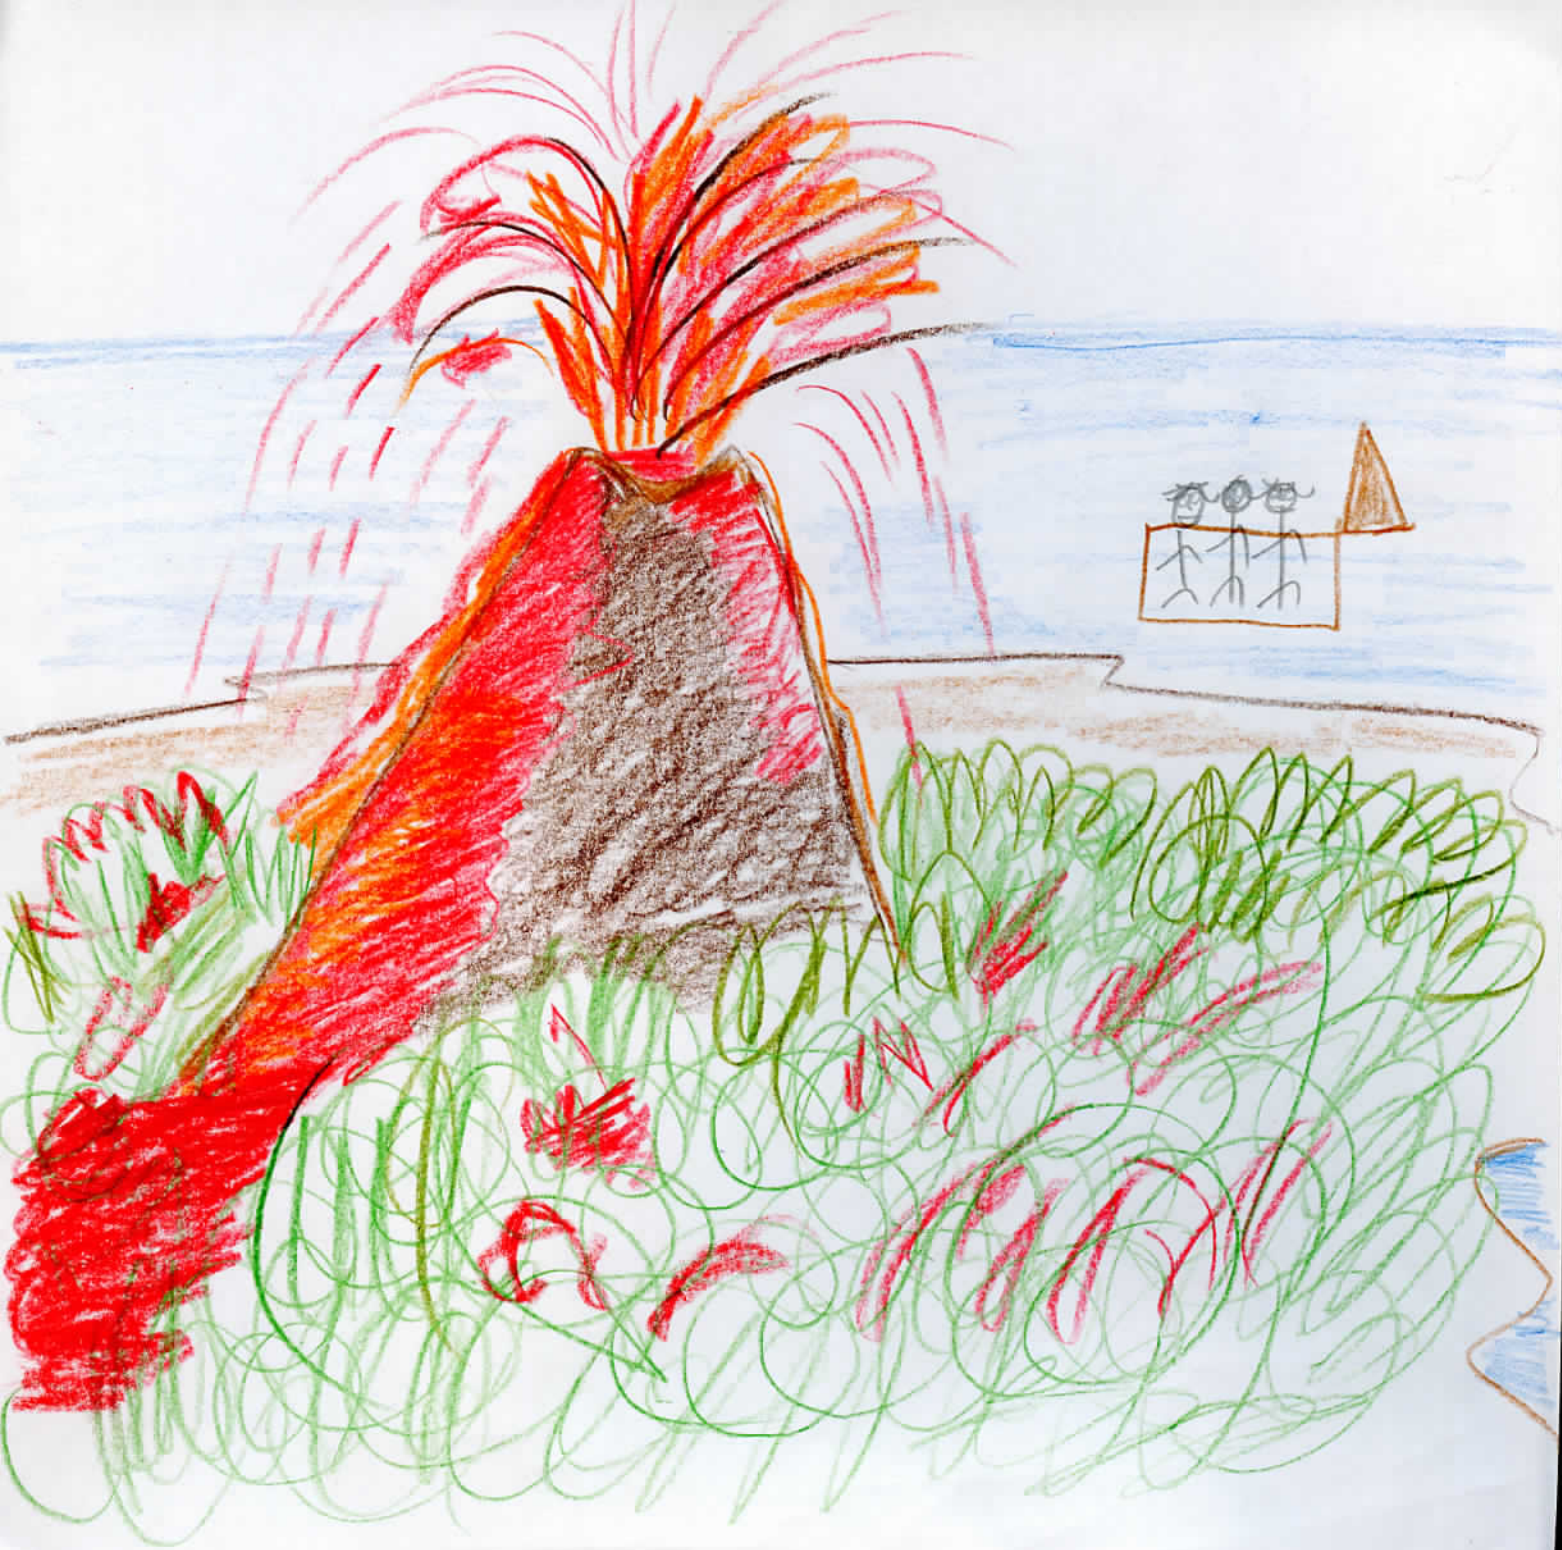

SCENA 3  
 IMPROVVISAMENTE DAL VULCANO COMINCIA AD USCIRE UN GRANDE GETTO DI LAVA. E I  
 RAGAZZI SCAPPANO DALL' <sup>BOSCO</sup> <sup>DI CEREAL</sup> MEZZO DI TRASPORTO PER FUGGIRE DALL' ISOLA. TROVANO  
 UNA BARCA ABBANDONATA. CI SALGONO SOPRA E RIESCONO A FUGGIRE DALL' ISOLA.



## **Supplement 5 - Frame 4 – The epilogue**

Selected examples of the stories' fourth frame, describing the conclusion.

Drawings were realized by the pupils of primary and secondary schools listed in Table 1. The schools' enrolment into the project was discussed by schools' board and then presented to the families at the beginning of the school year, as a part of the school curriculum (Piano Triennale di Offerta Formativa). We did not collect any personal information about the participating students who always worked in pairs or small groups. Students were explicitly asked not to print their full names on their compositions. The production of text and drawings was not compulsory and students were free to decide the degree of their involvement in the exercise. The stories we collected were freely donated to be used for research purposes such as the present manuscript. Originals are kept into the Edurisk archives.

The supplement is provided as a portfolio, with examples of the collected materials.



3

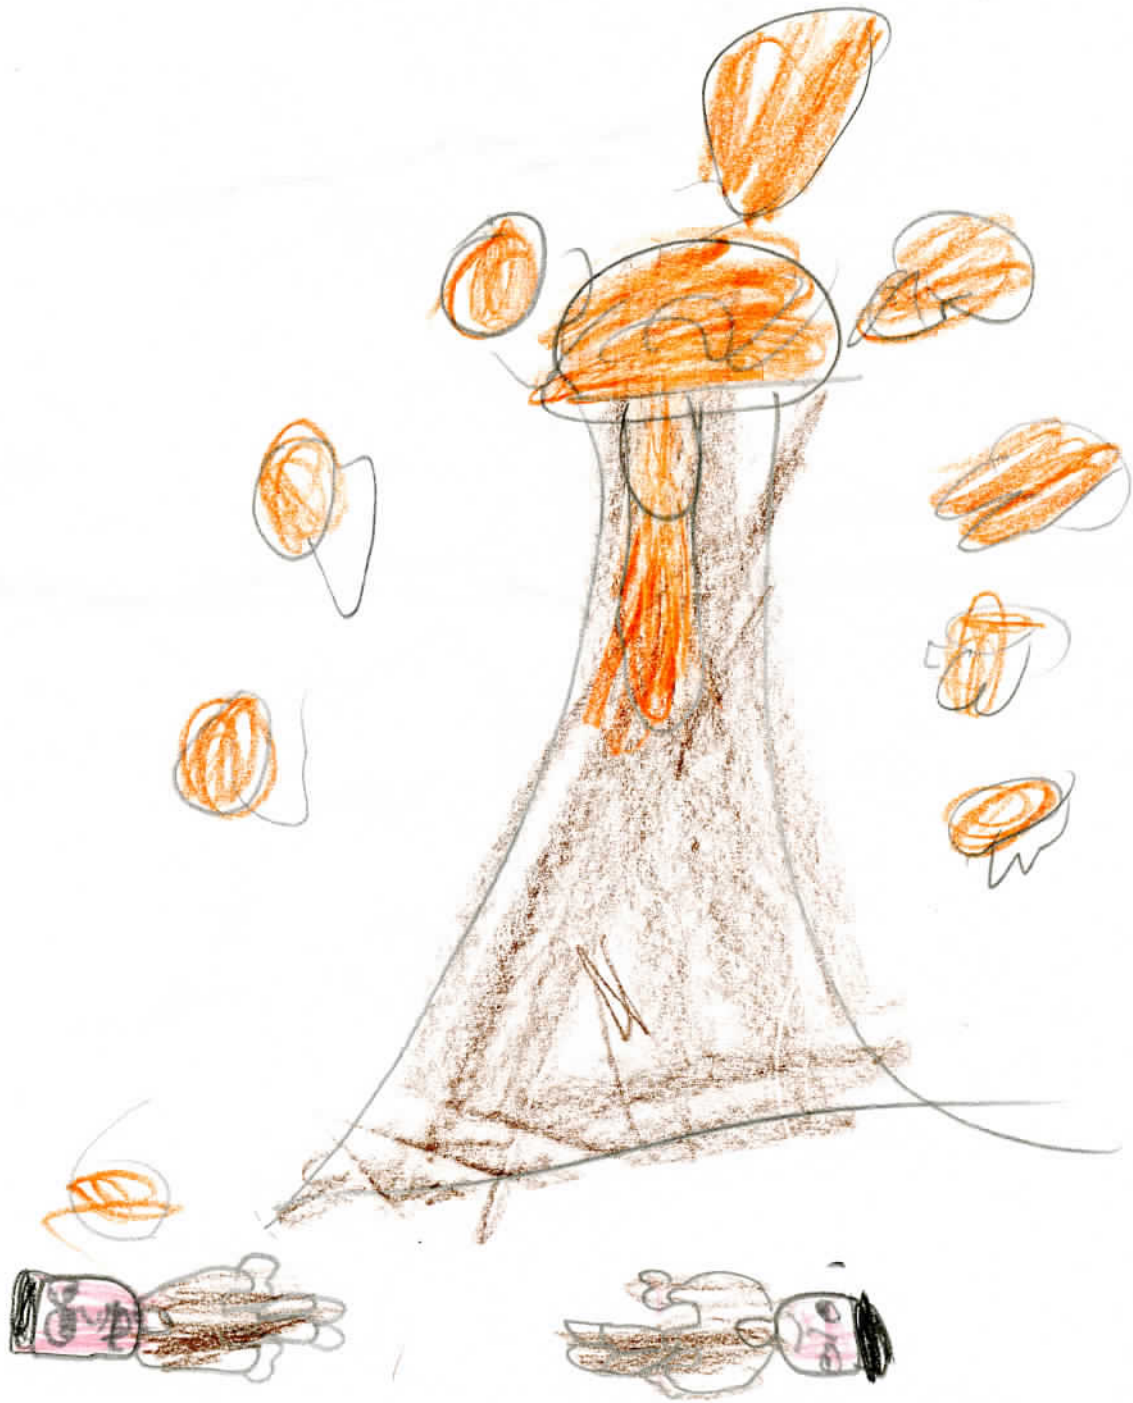



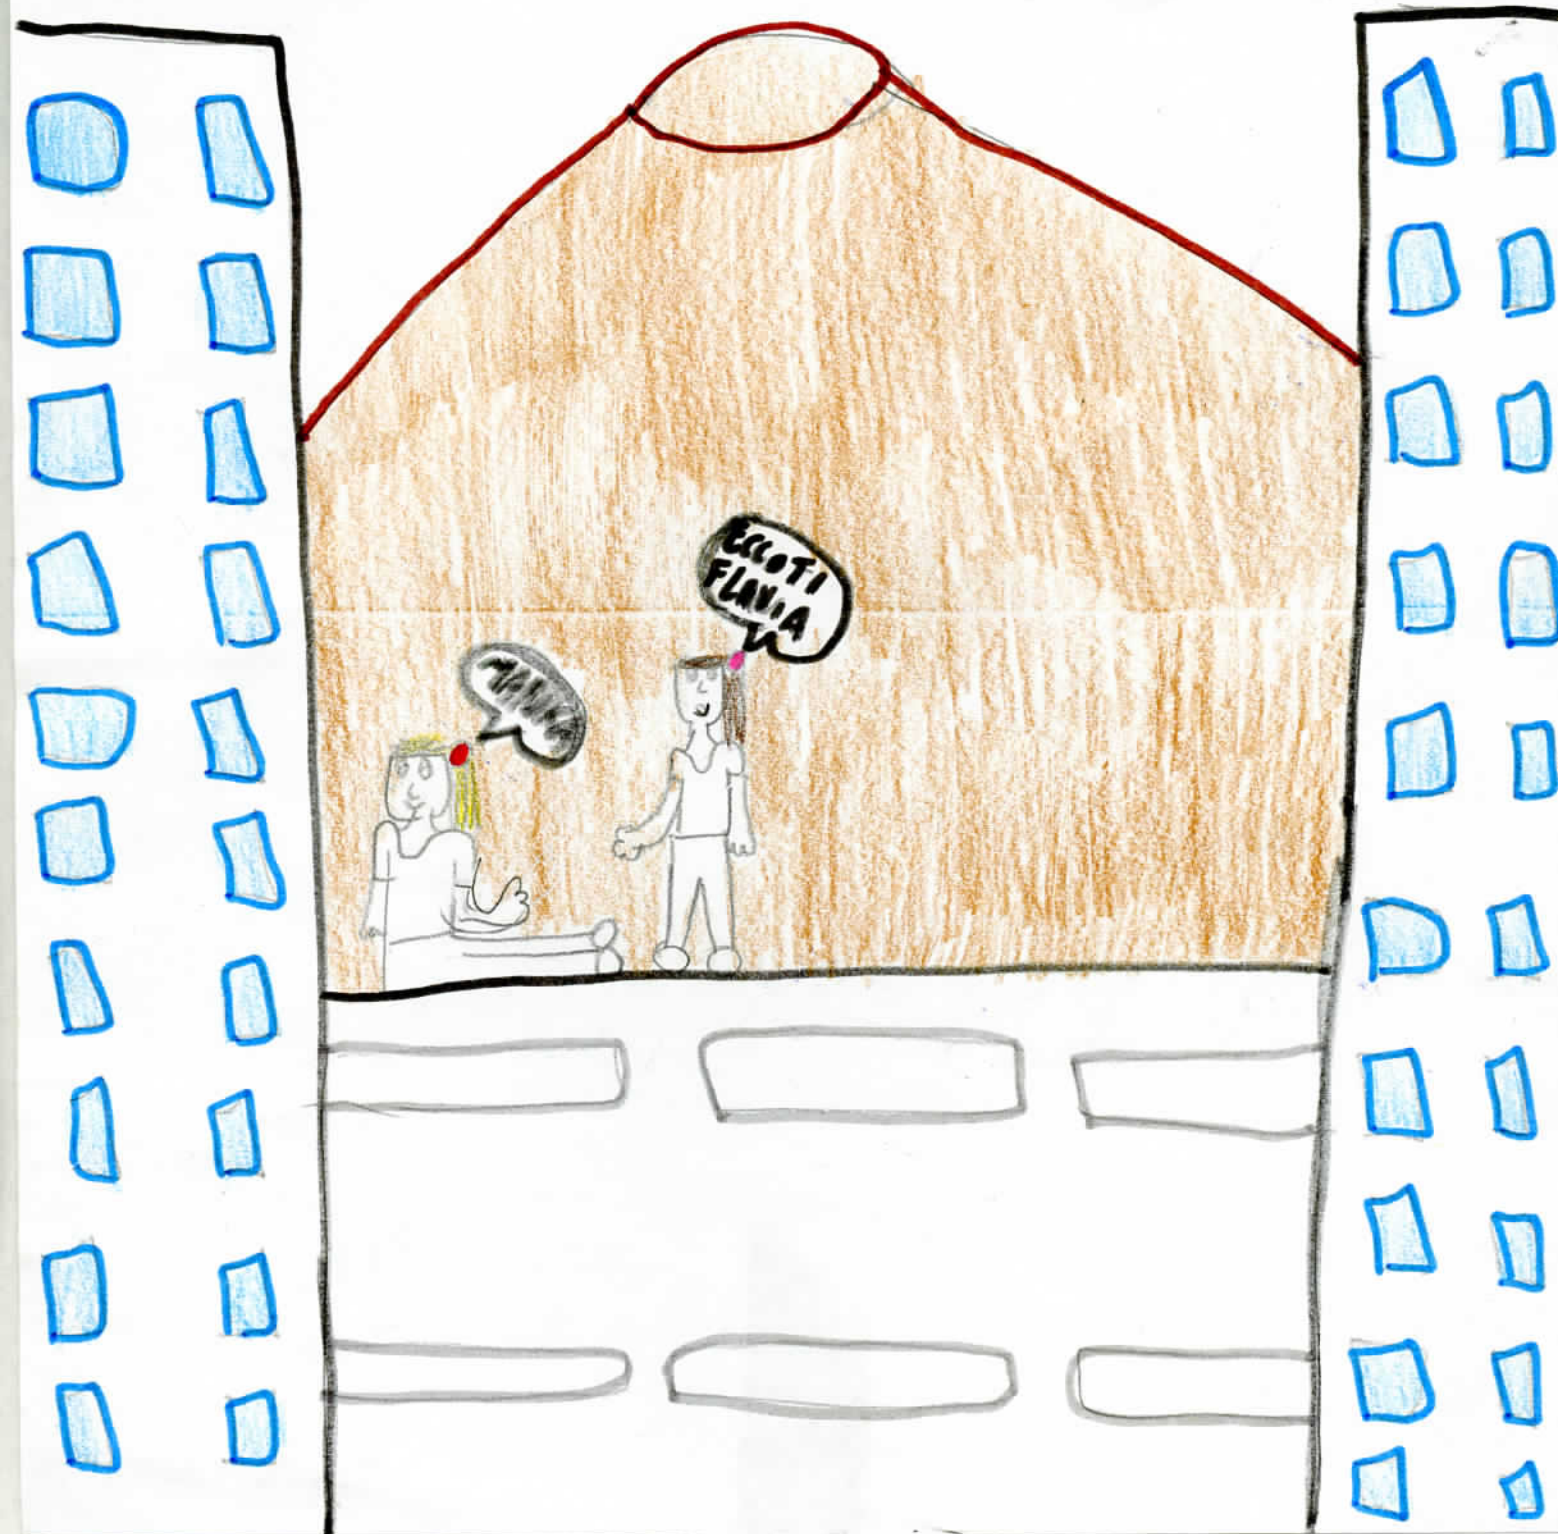

Il ritorno di Flavia

Mi sono girata e ho visto che Flavia non c'era, sono andata in stanza  
 per lei la casa era tanto e c'era un grande quantitativo. Non  
 Flavia si era alzata e non pino andava molto superando i  
 quartieri stagnoli. Lei sono andate a cercare ed era in un  
 Le ho preso in braccio e l'ho portata con me. Sono venuti i soccorsi  
 o quartieri, dopo che era il servizio ha numero di buttare e  
 perfettamente ziommo tutti sani e salvi.



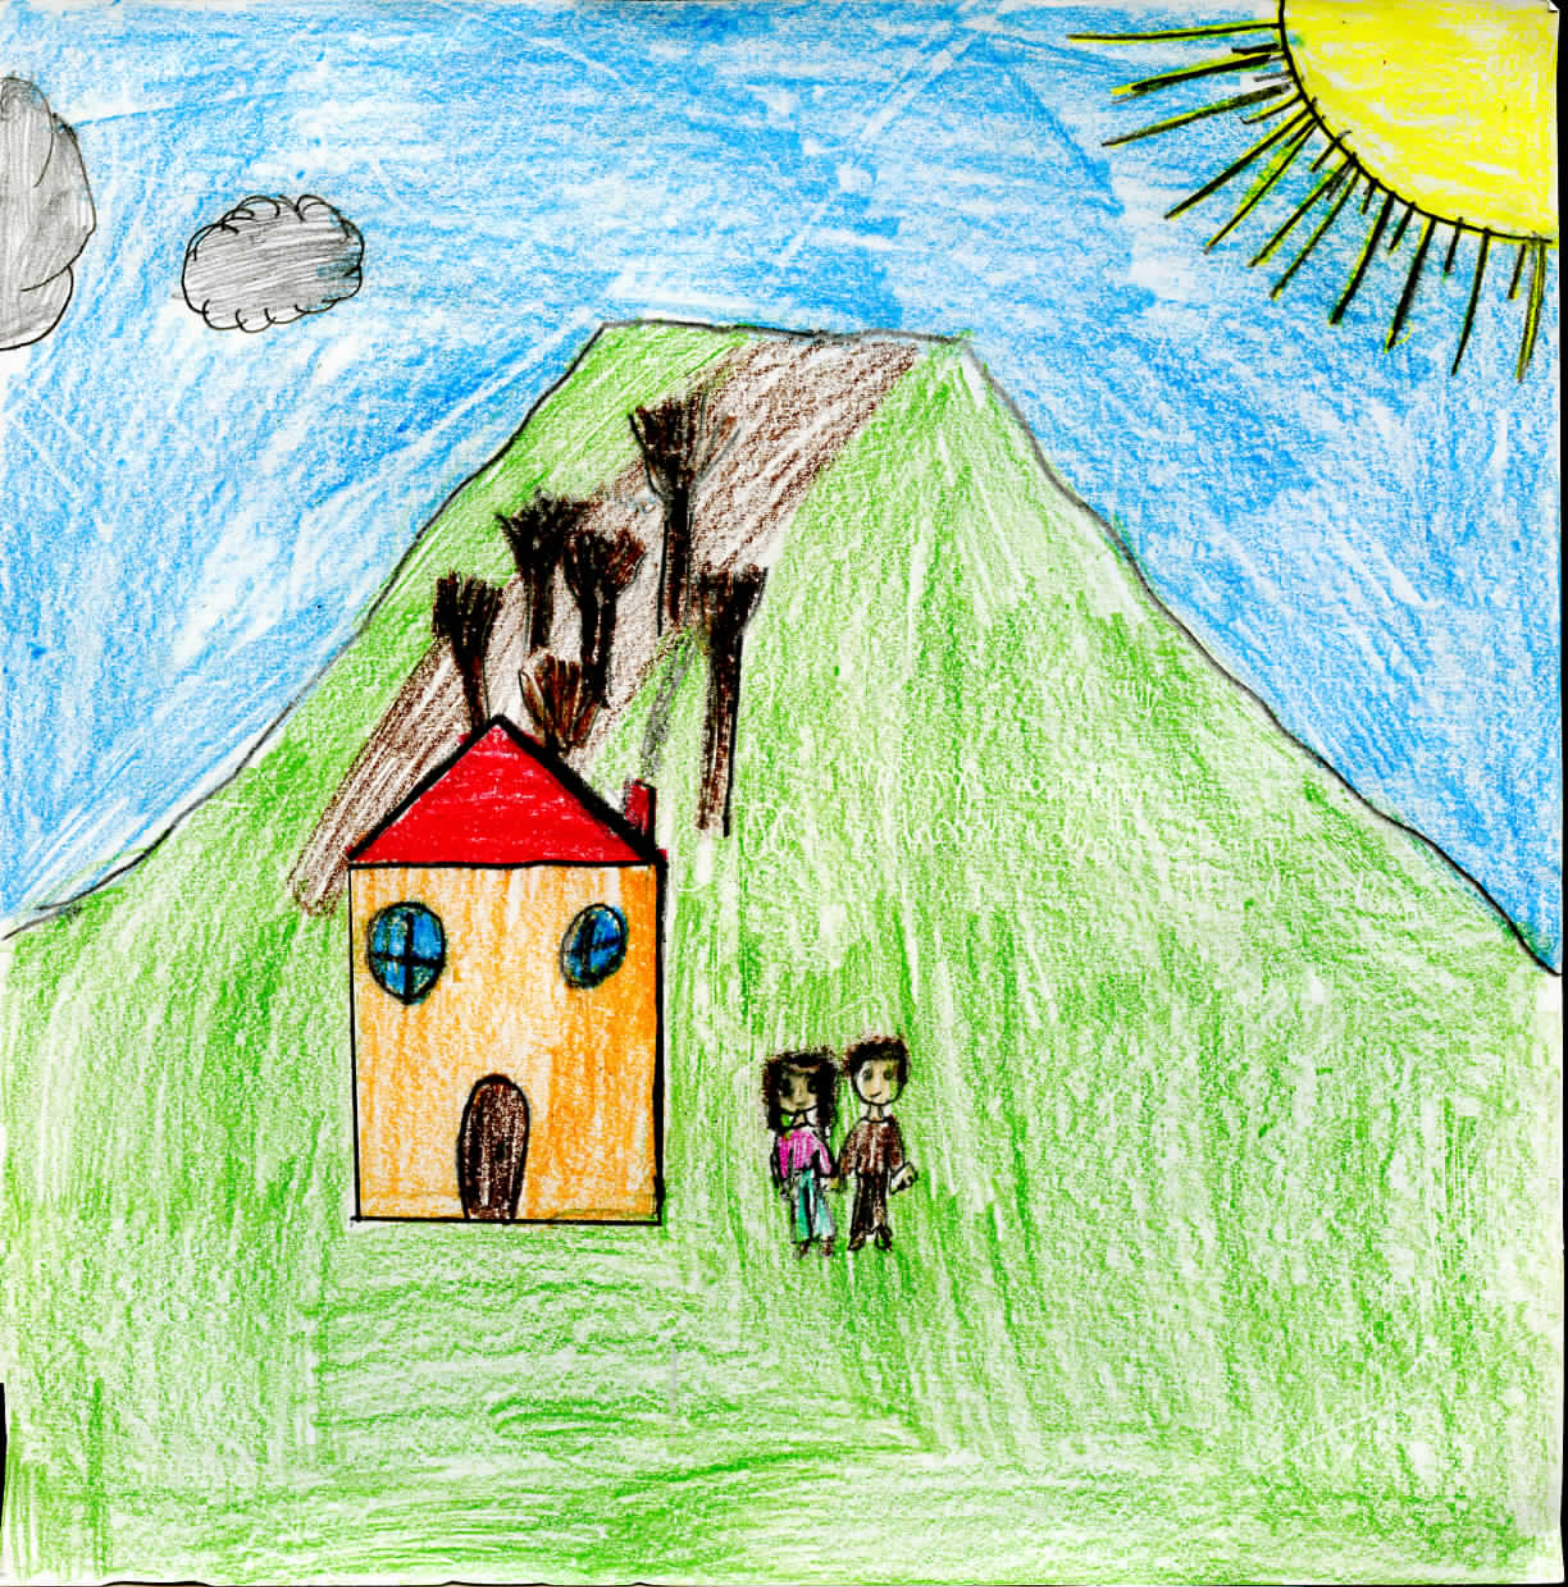

L'eruzione finì il mugnaio e sua moglie tornarono <sup>casa</sup> ~~alla~~ ~~vissuta~~  
tutti felici e contenti.



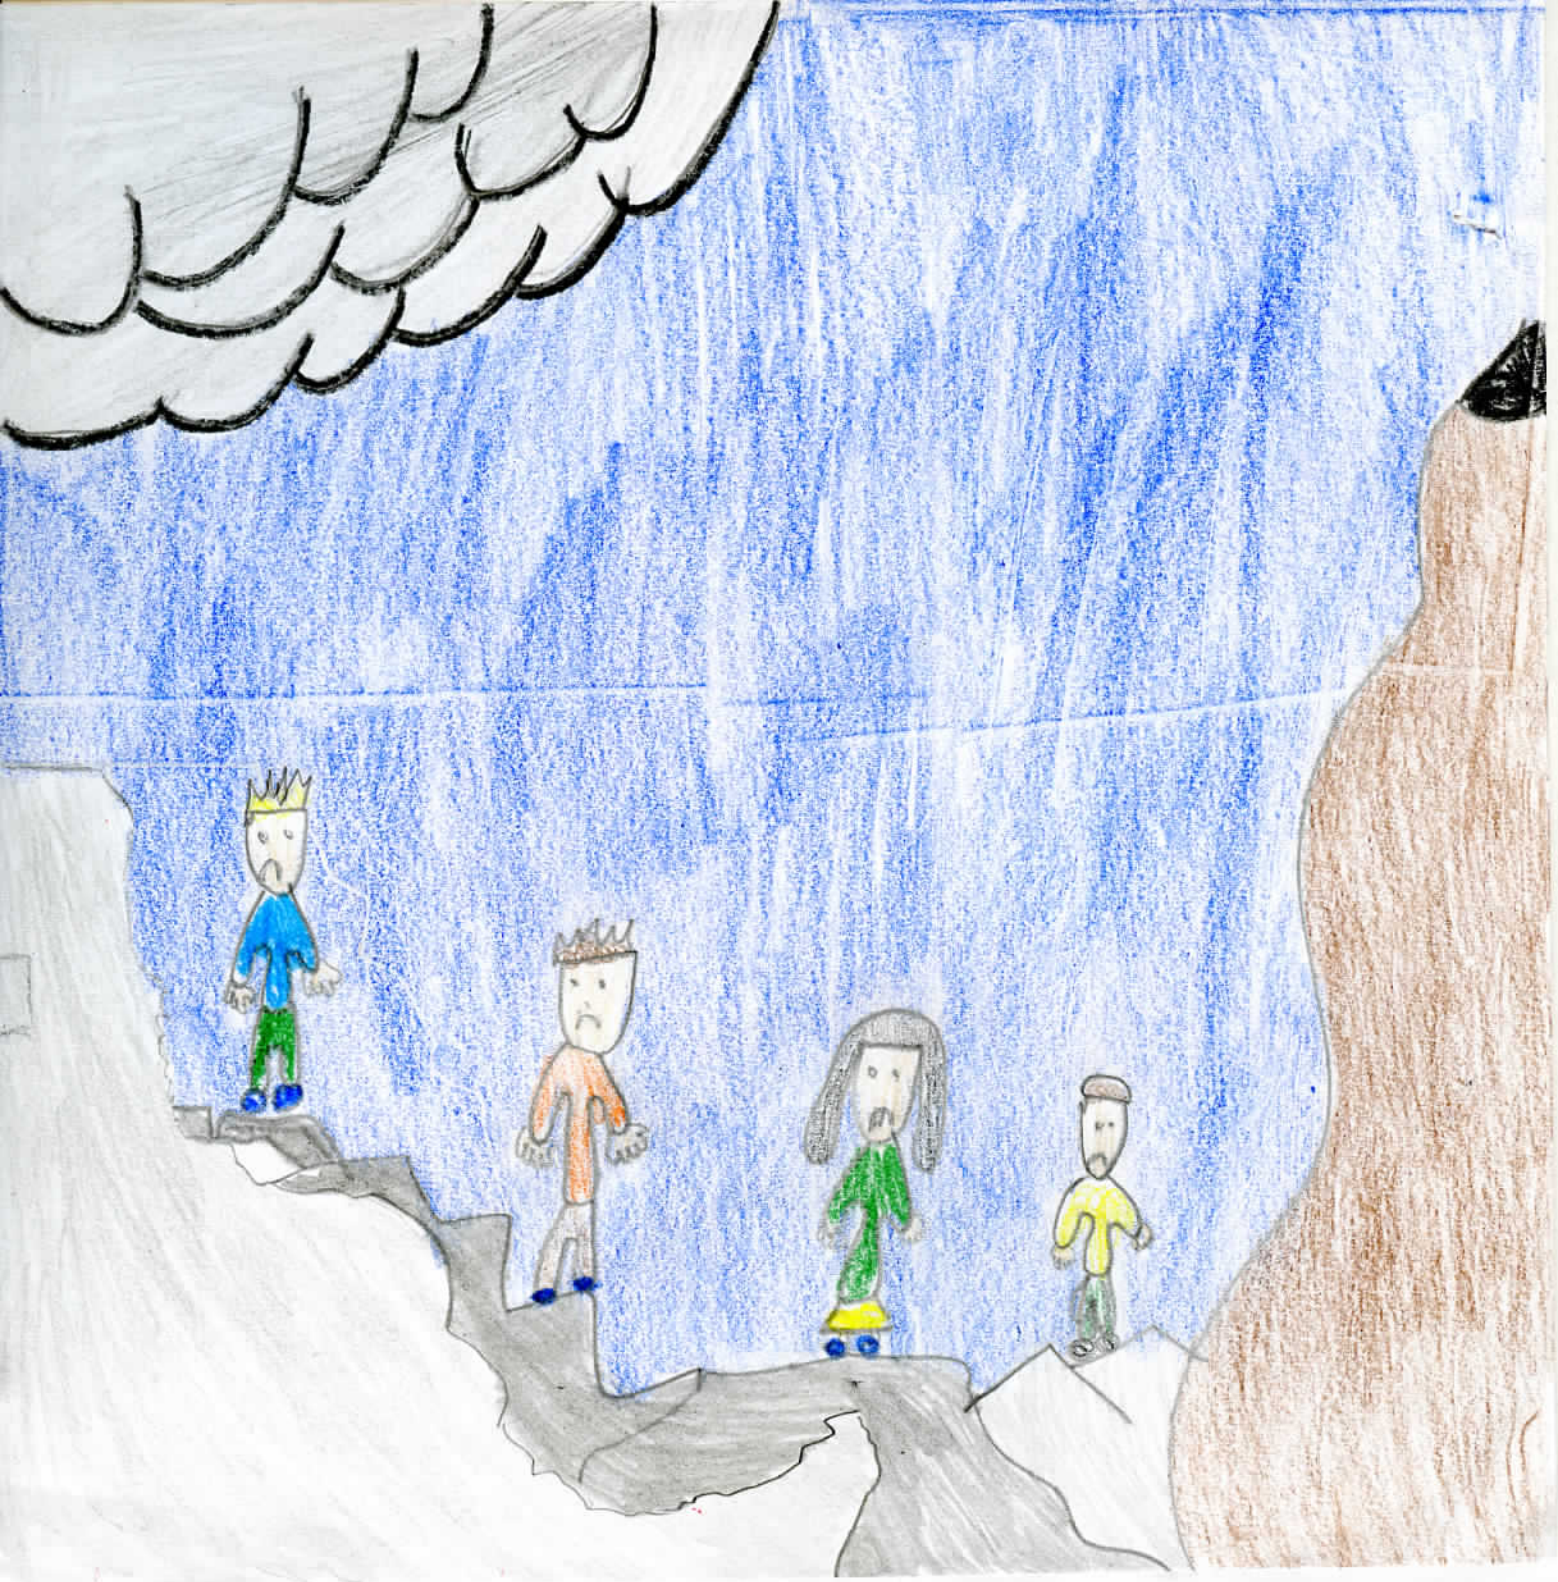

Quando il vesuvio mise dirottore, tutte le case erano distrutte  
e la mamma e il papà aiutarono la città per ricostruire le case



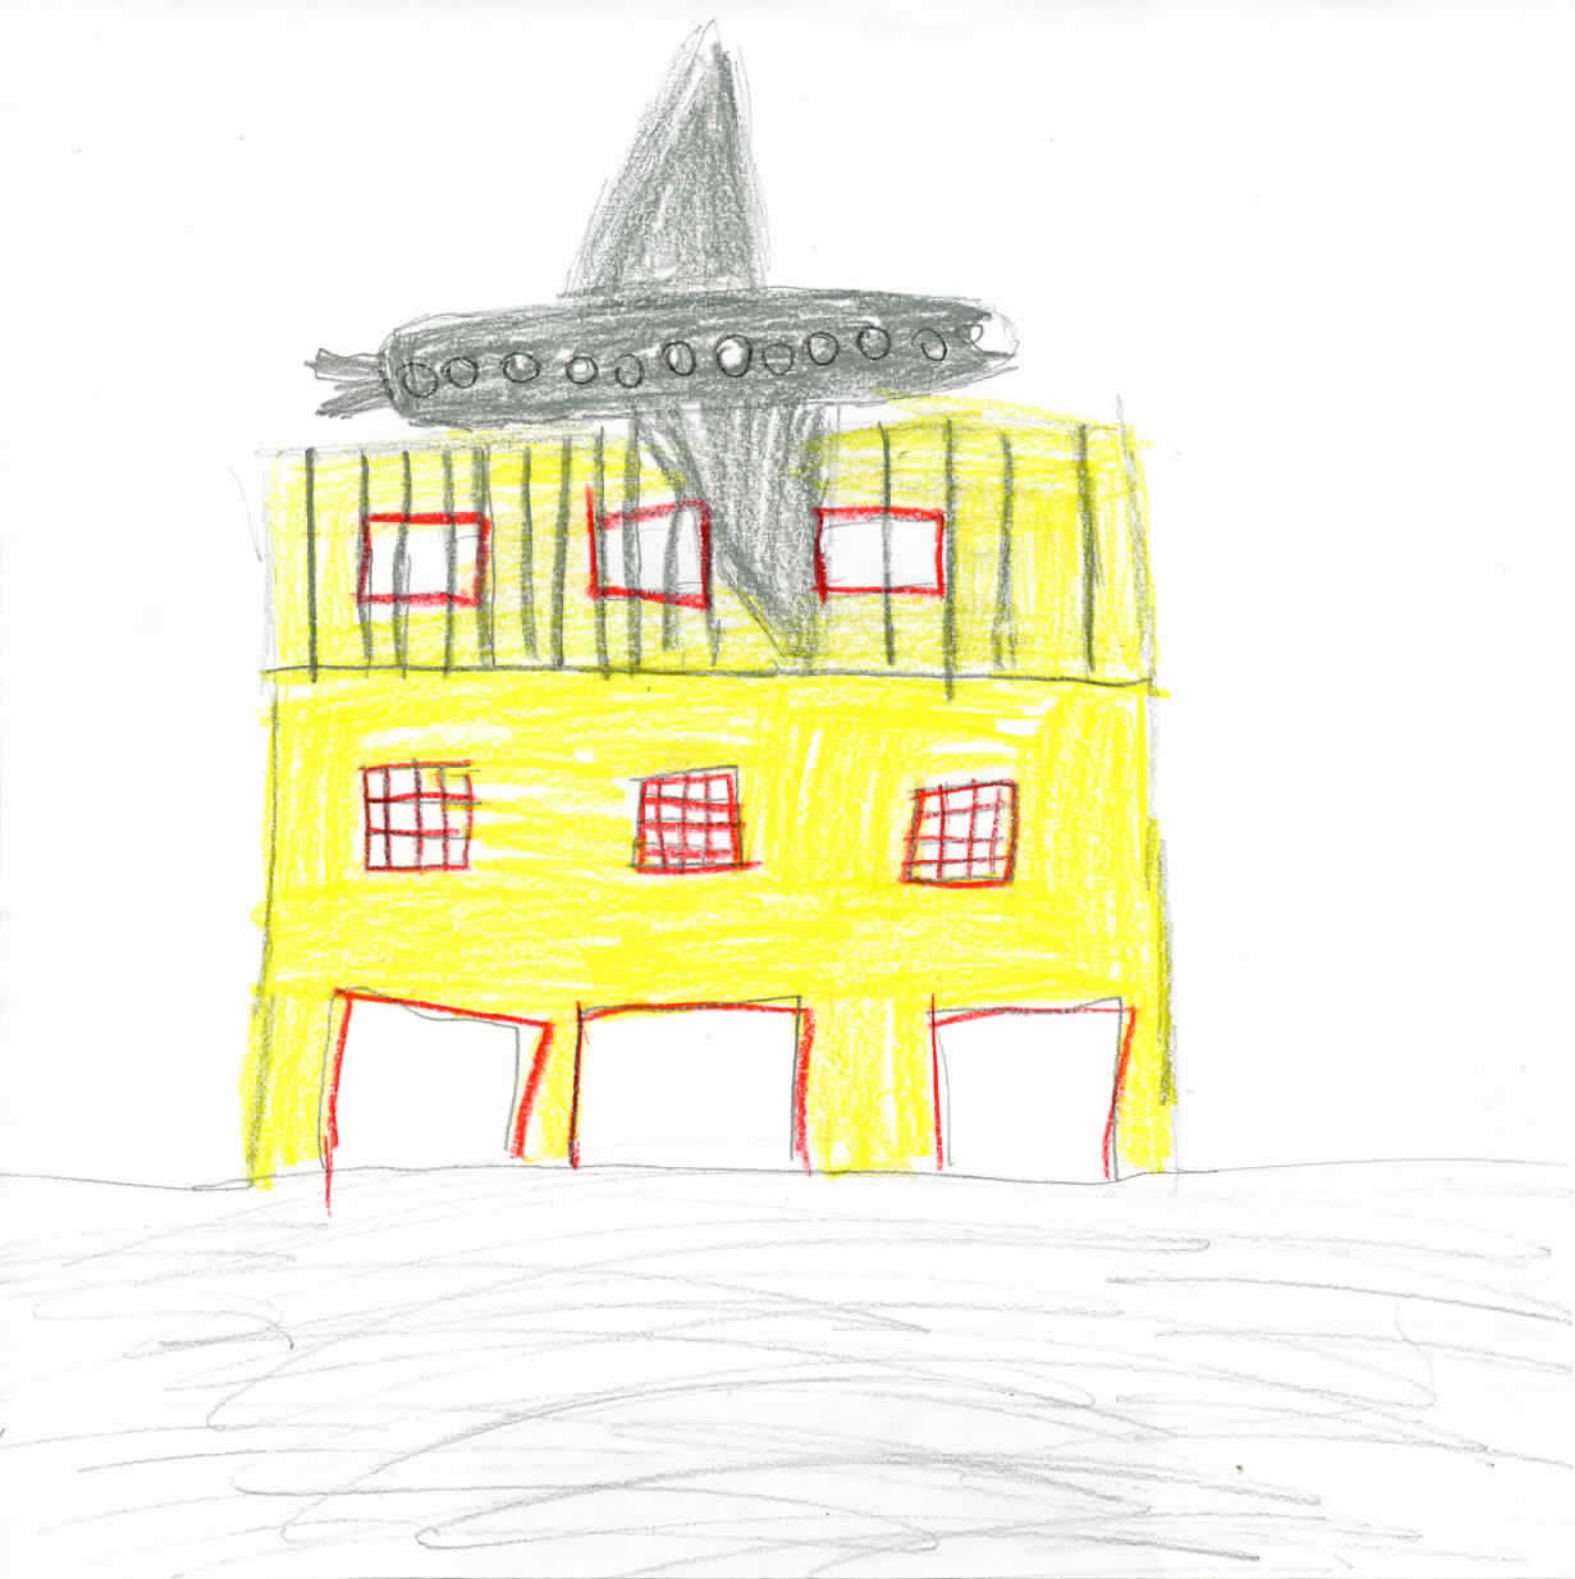

Dopo un po' arriva un aereo e si appoggia sul tetto della scuola.  
Tutti gli alieni si salgono, i genitori sono già lì, alieni, andranno in un altro paese  
lontano dai vulcani.



Scena n° 4

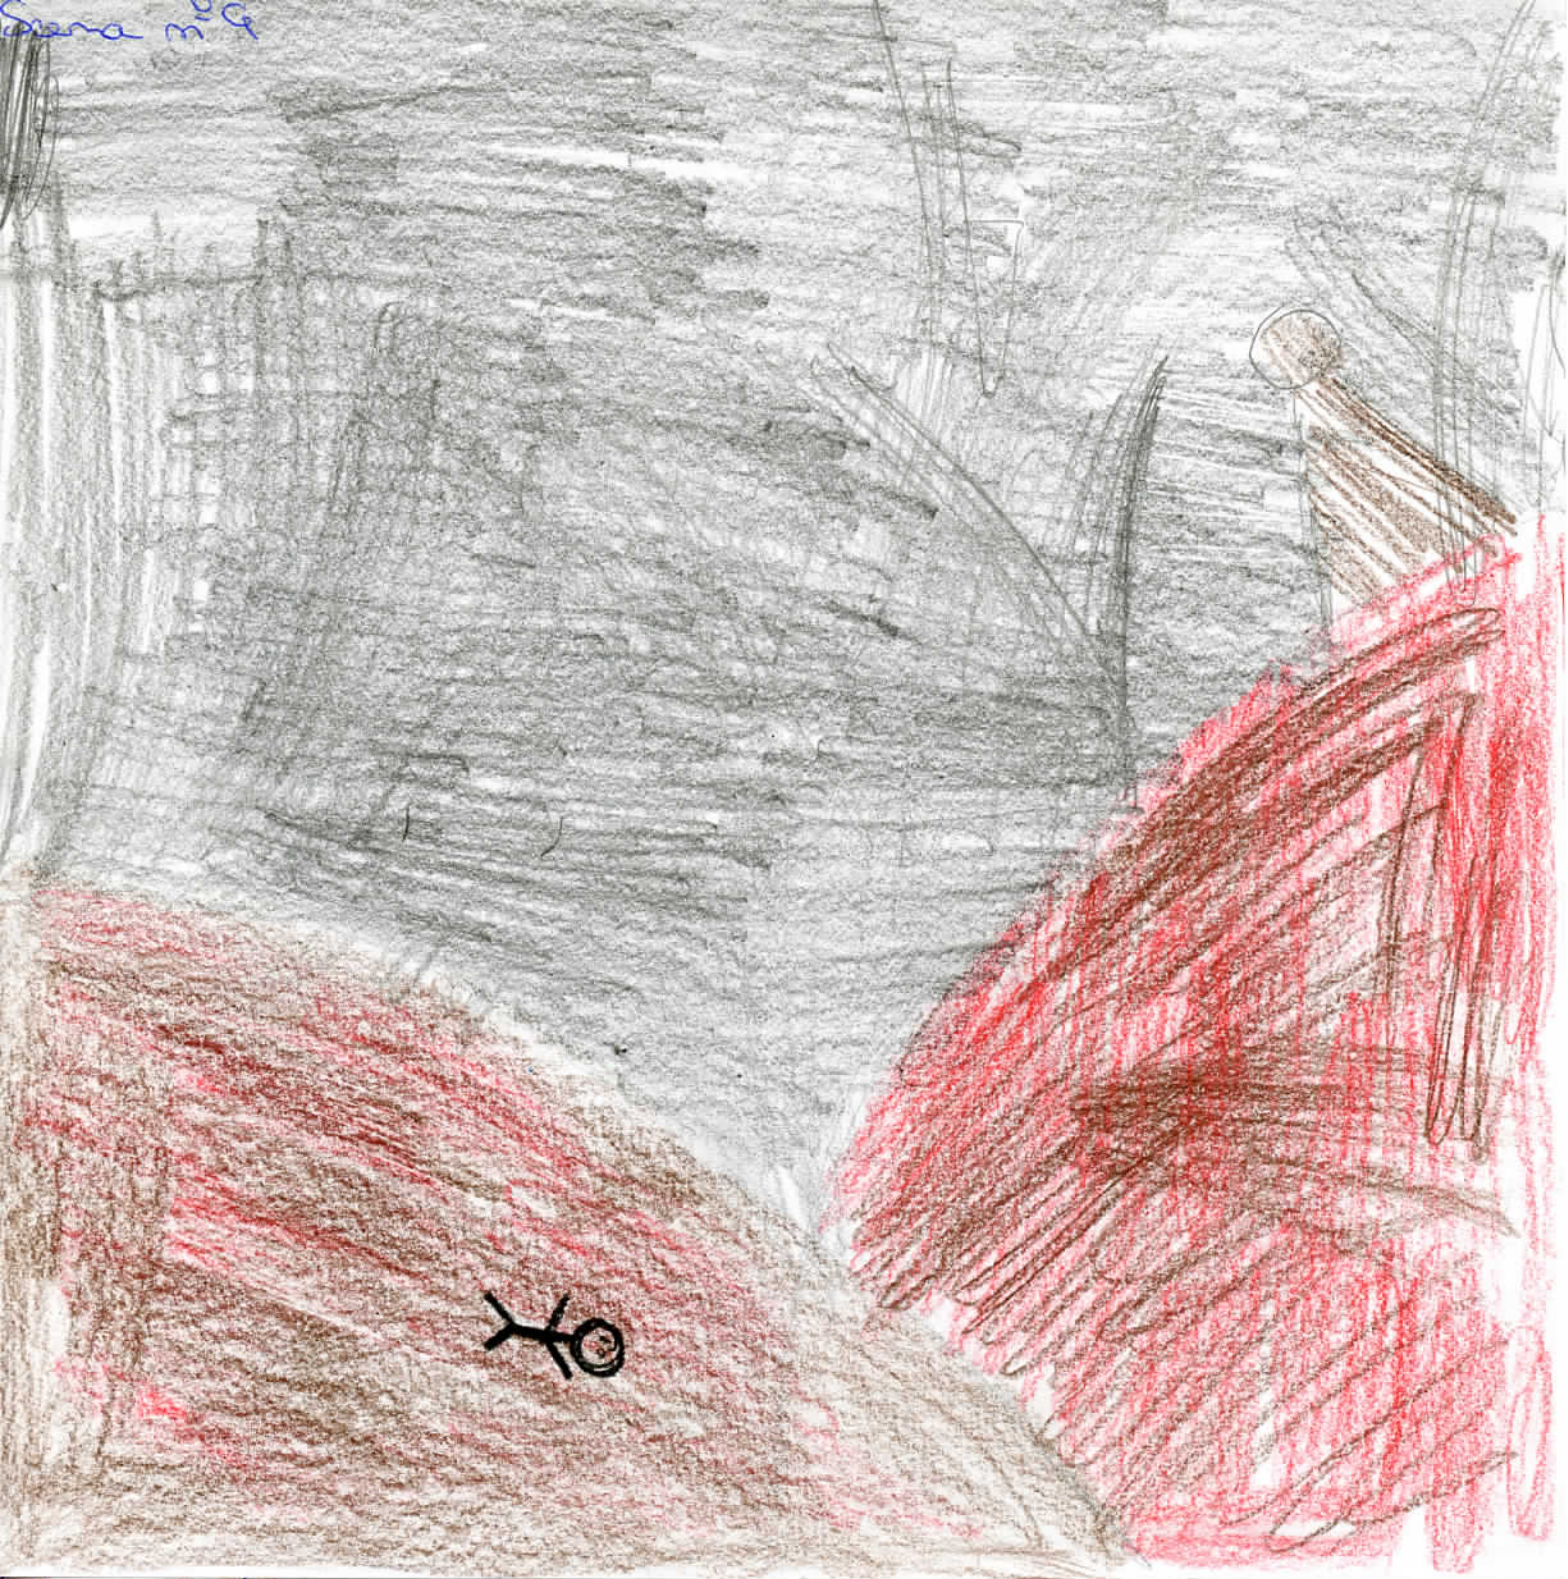

Scena n° 4

Giulia corre ancora ma dopo pochi secondi lei cade nella lava  
e muore, subito dopo l'azione finisce.



3

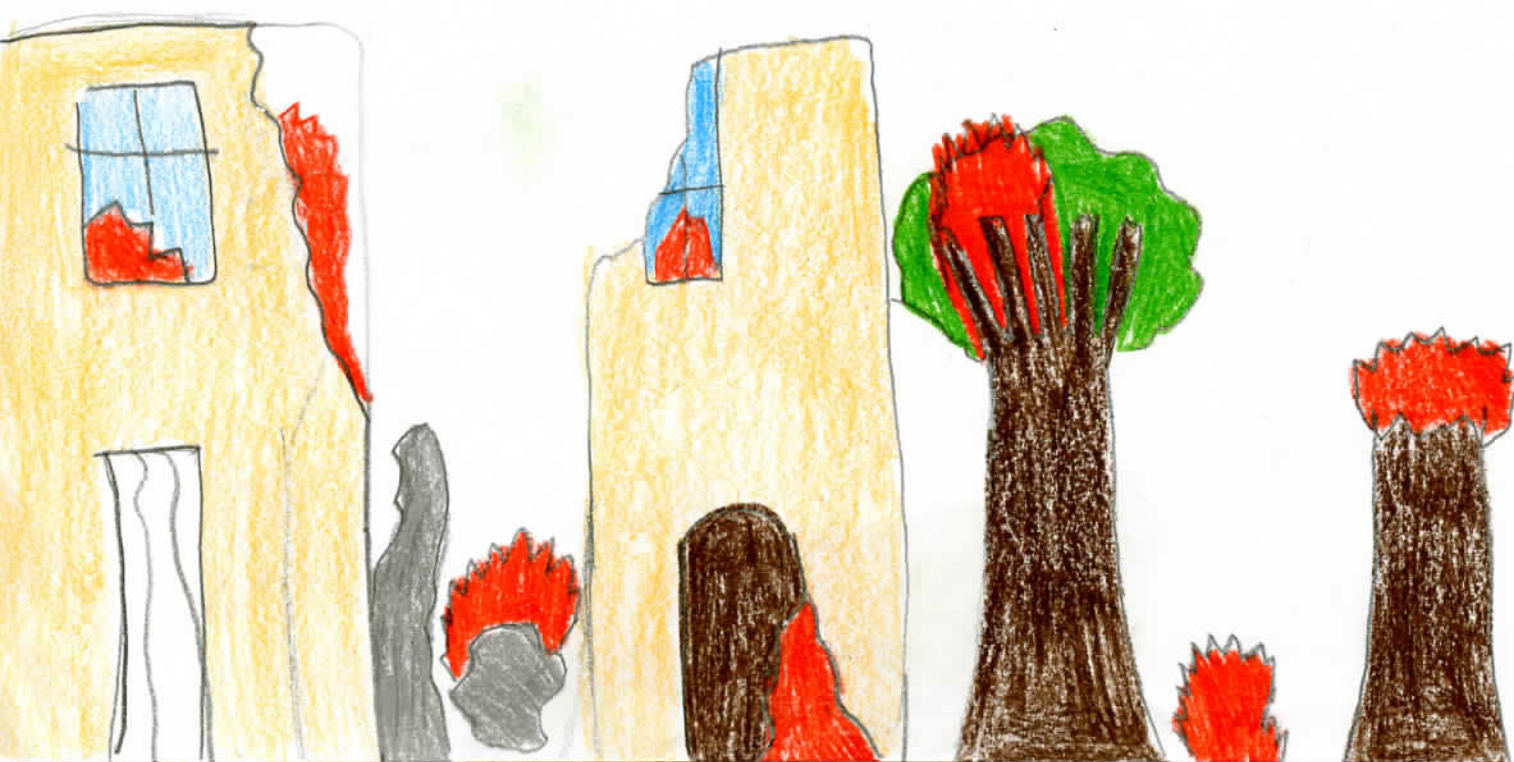

Dopo l'eruzione andarono a vedere cosa era successo. Rimase  
tutti sbalorditi. Tutte le piante erano distrutte, le cose cadde  
a pezzi e tanti animali morti.

4



# SCENA 4

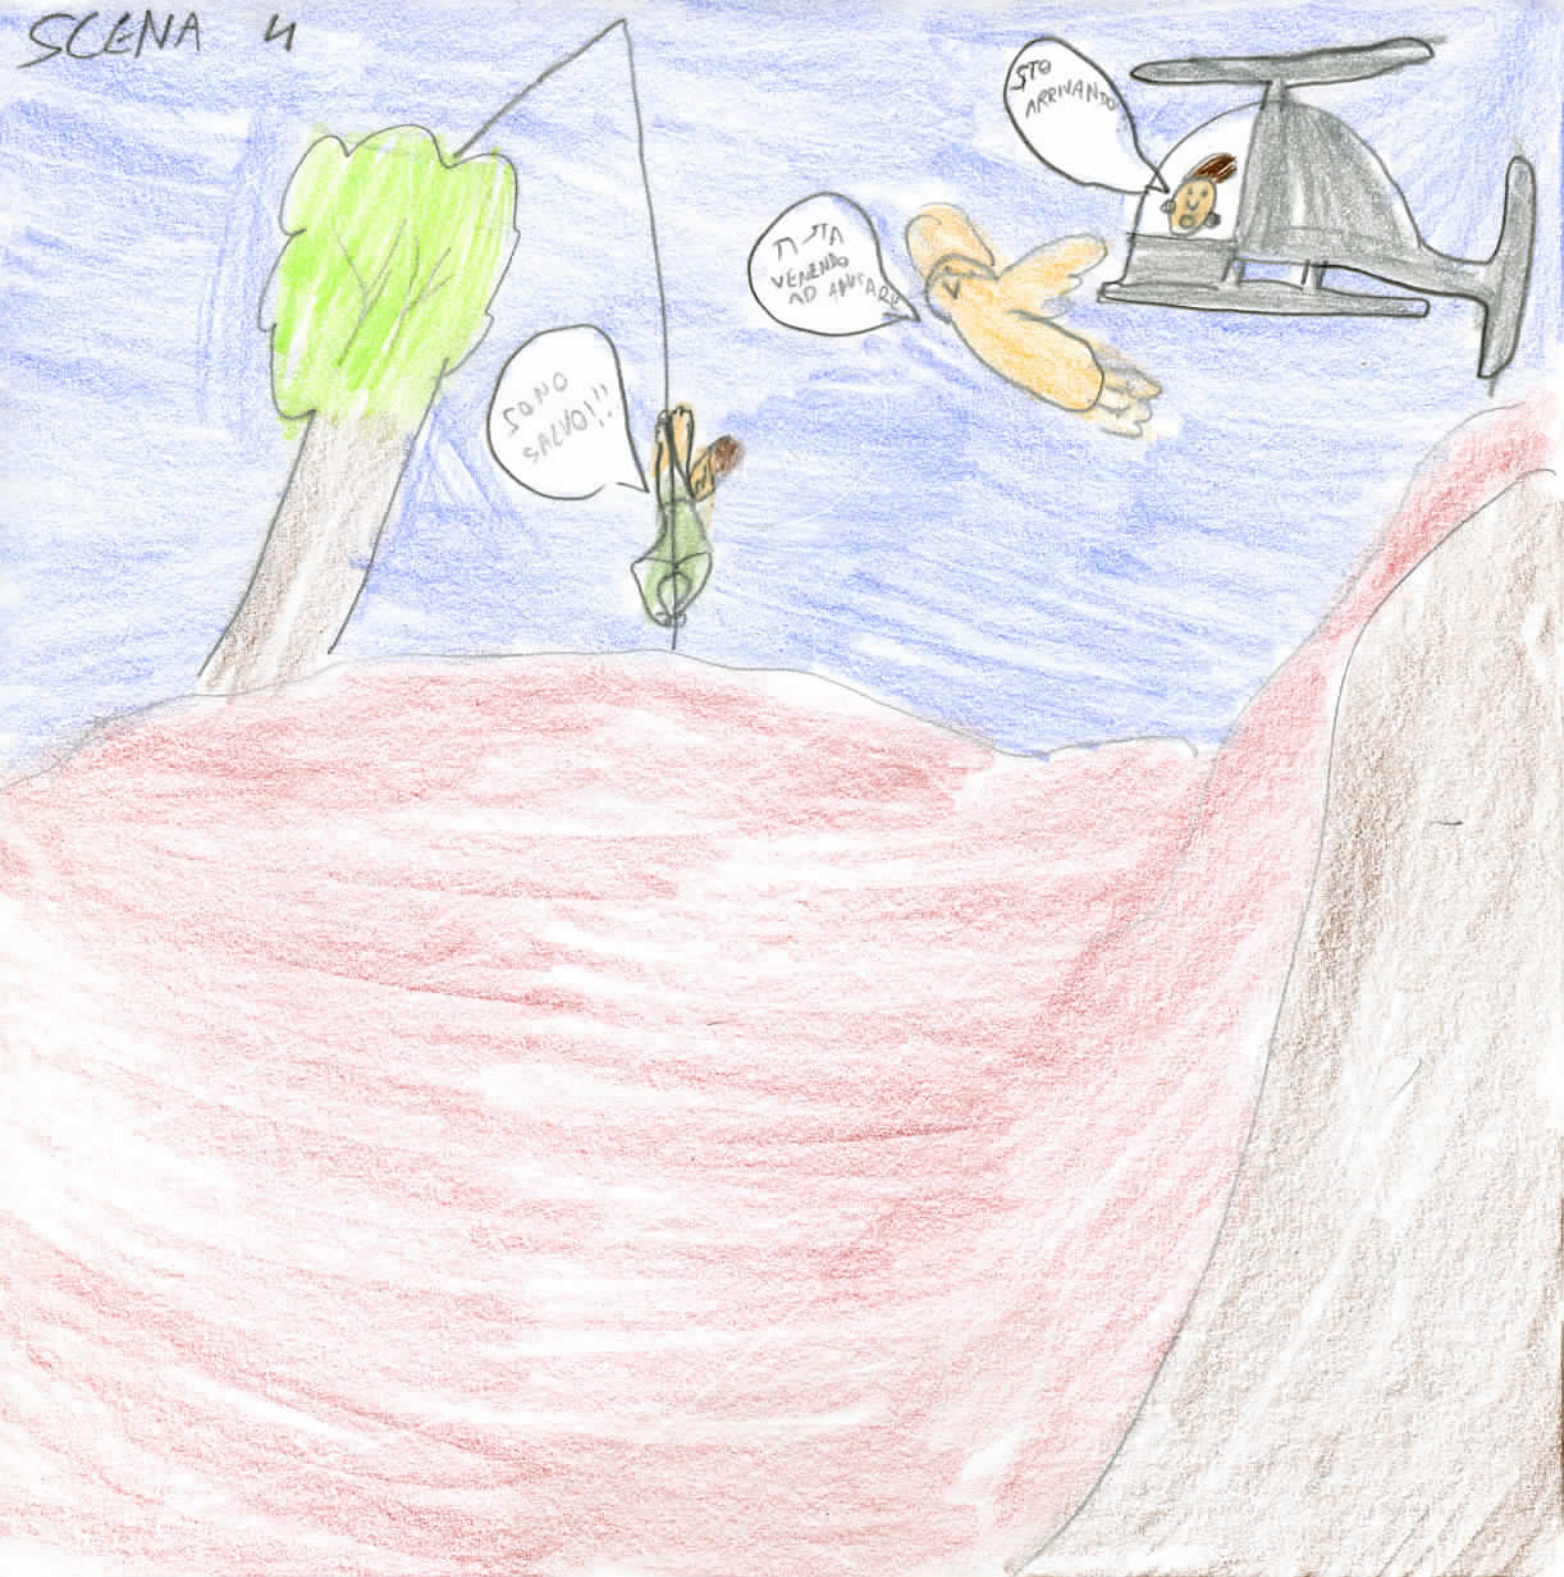

## SCENA 4

Era finita la lava. Il pappagallo tornò con <sup>un</sup> elicottero e lo salvò. Così tornò con i suoi genitori e vissero tutti felici e contenti con il suo affettuoso pappagallo.



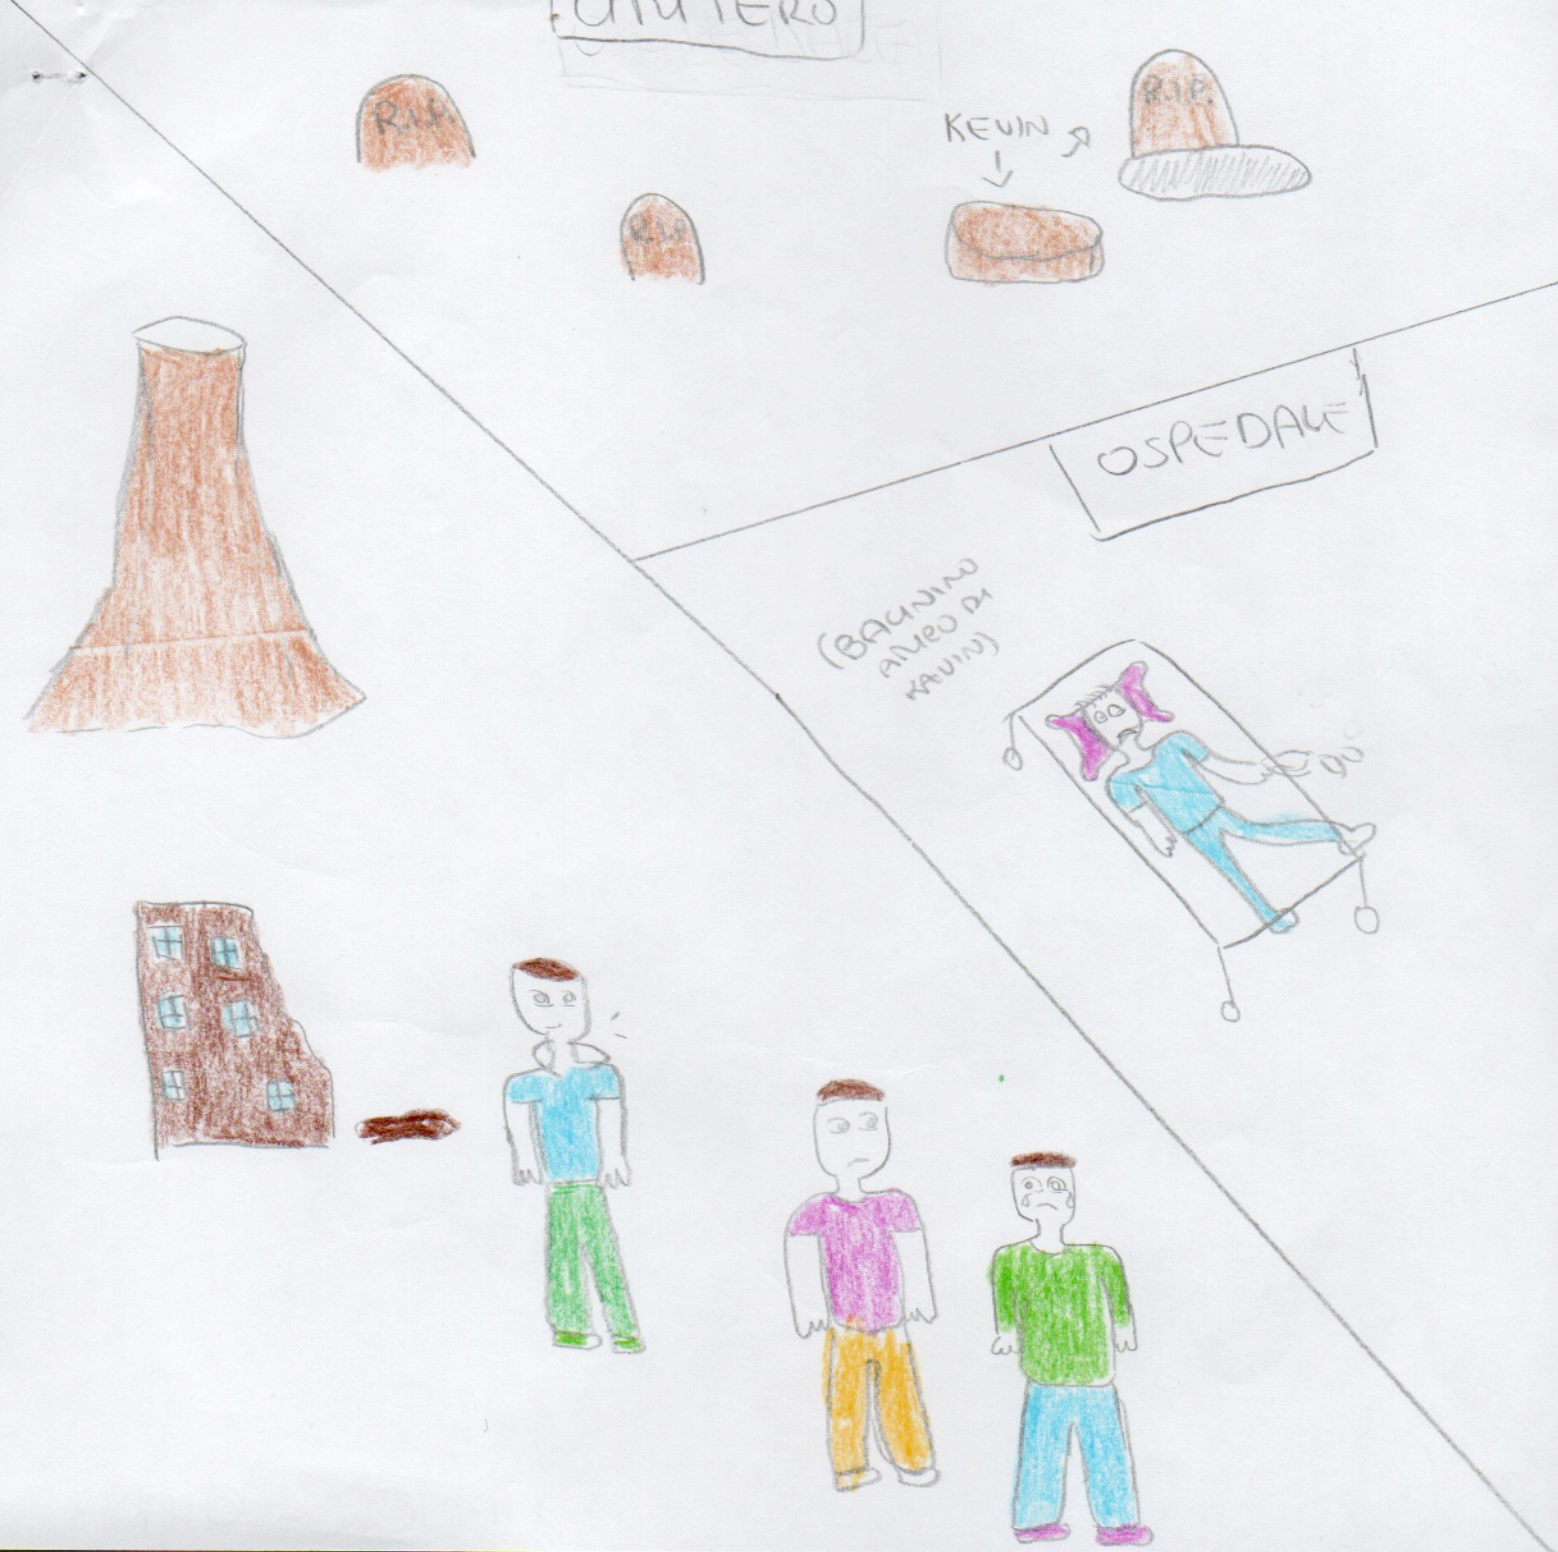

È finito il caso ma la città è distrutta.  
 Il bagnino amico di Kevin ~~non~~ ~~non~~ gli venne  
 un infarto per la paura, invece Kevin morì perché  
 per scappare venne investito da un camion dei pompieri.



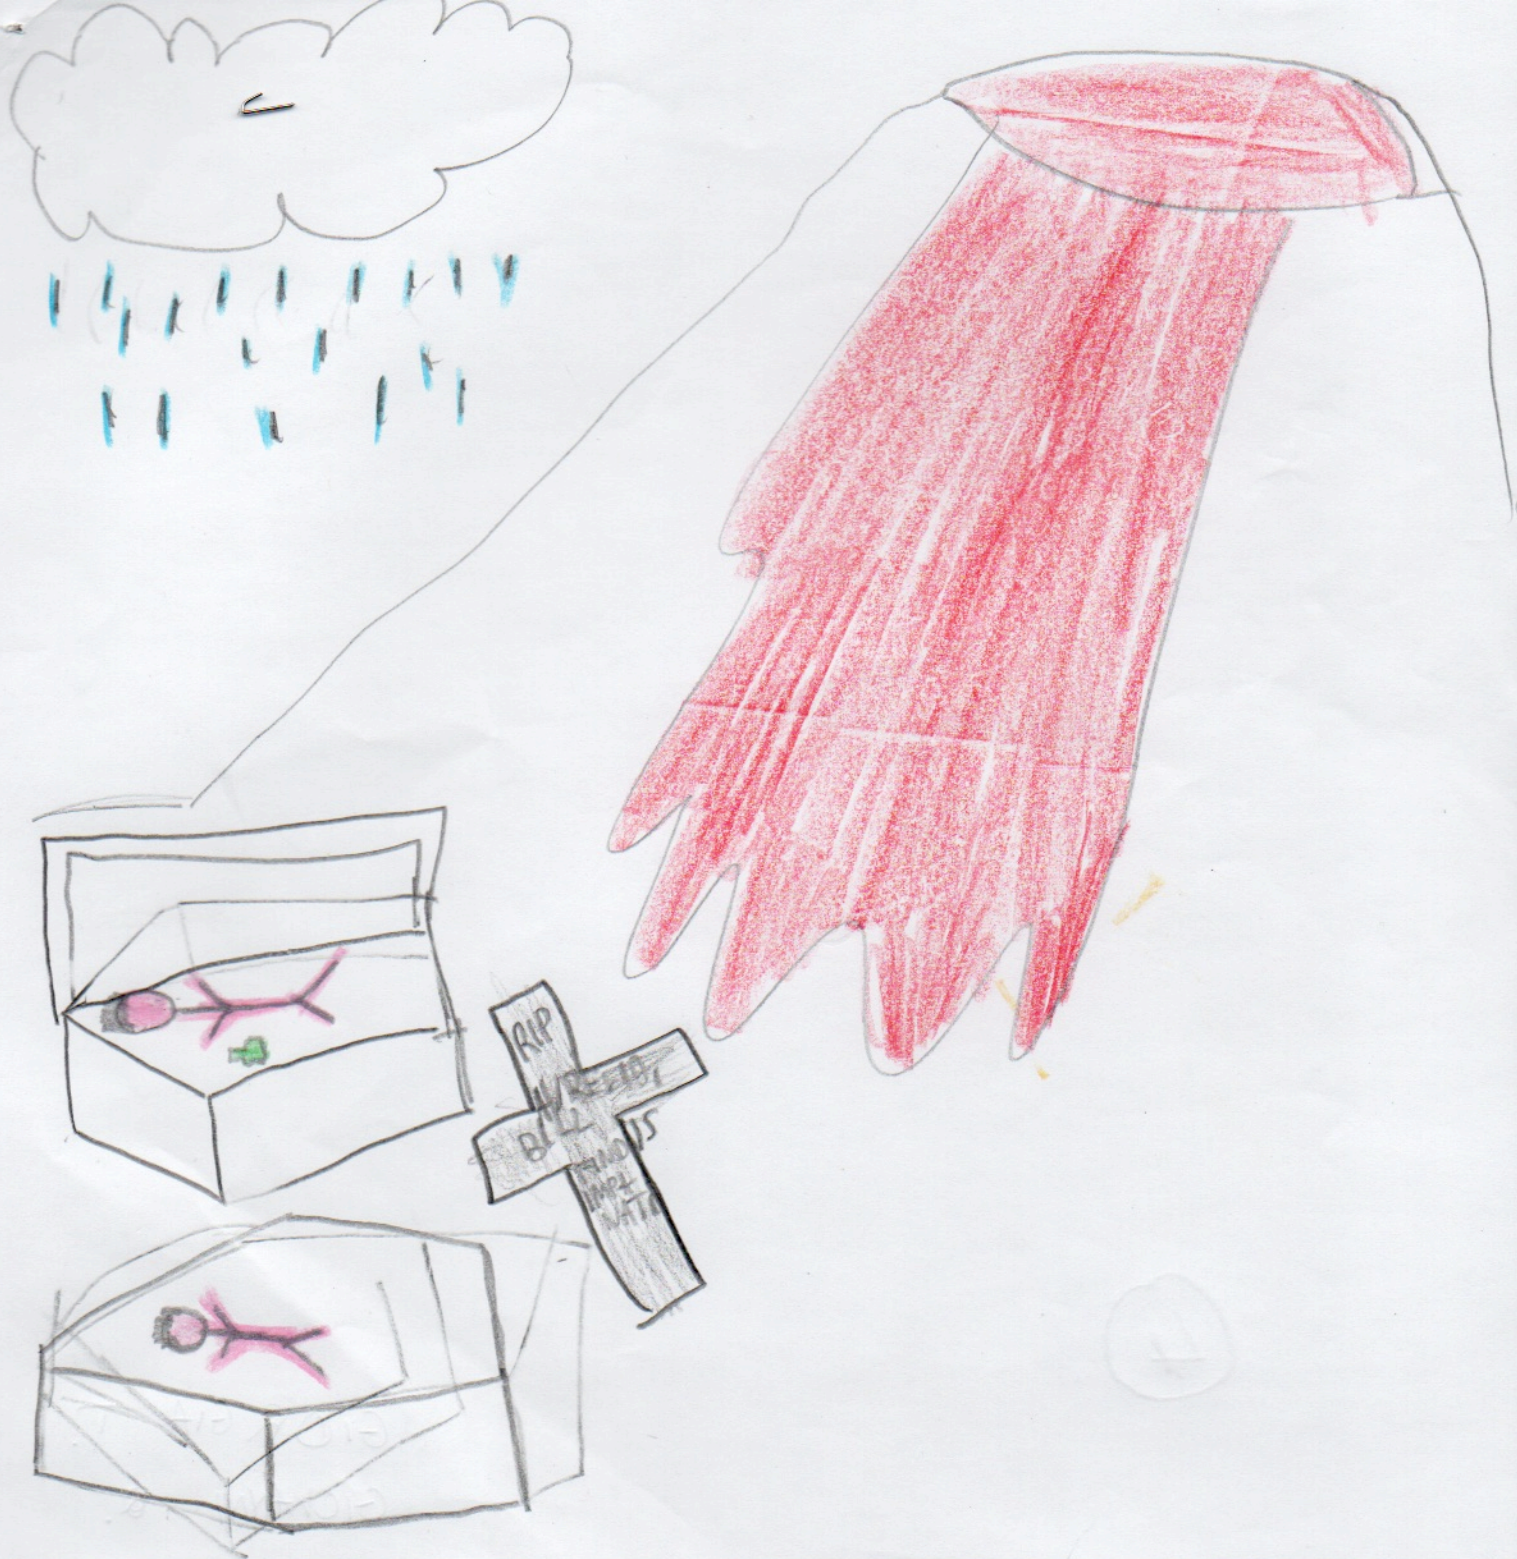

Alexio non riesce a salvare Bill perché inciampa su un sasso e rotolano verso la lava molendo.

Il vulcano piano piano si ferma, ma ormai è troppo <sup>tardi</sup>, la città è stata inondata dalla lava e si è salvata solo una bottiglia di birra.

FINE ♥



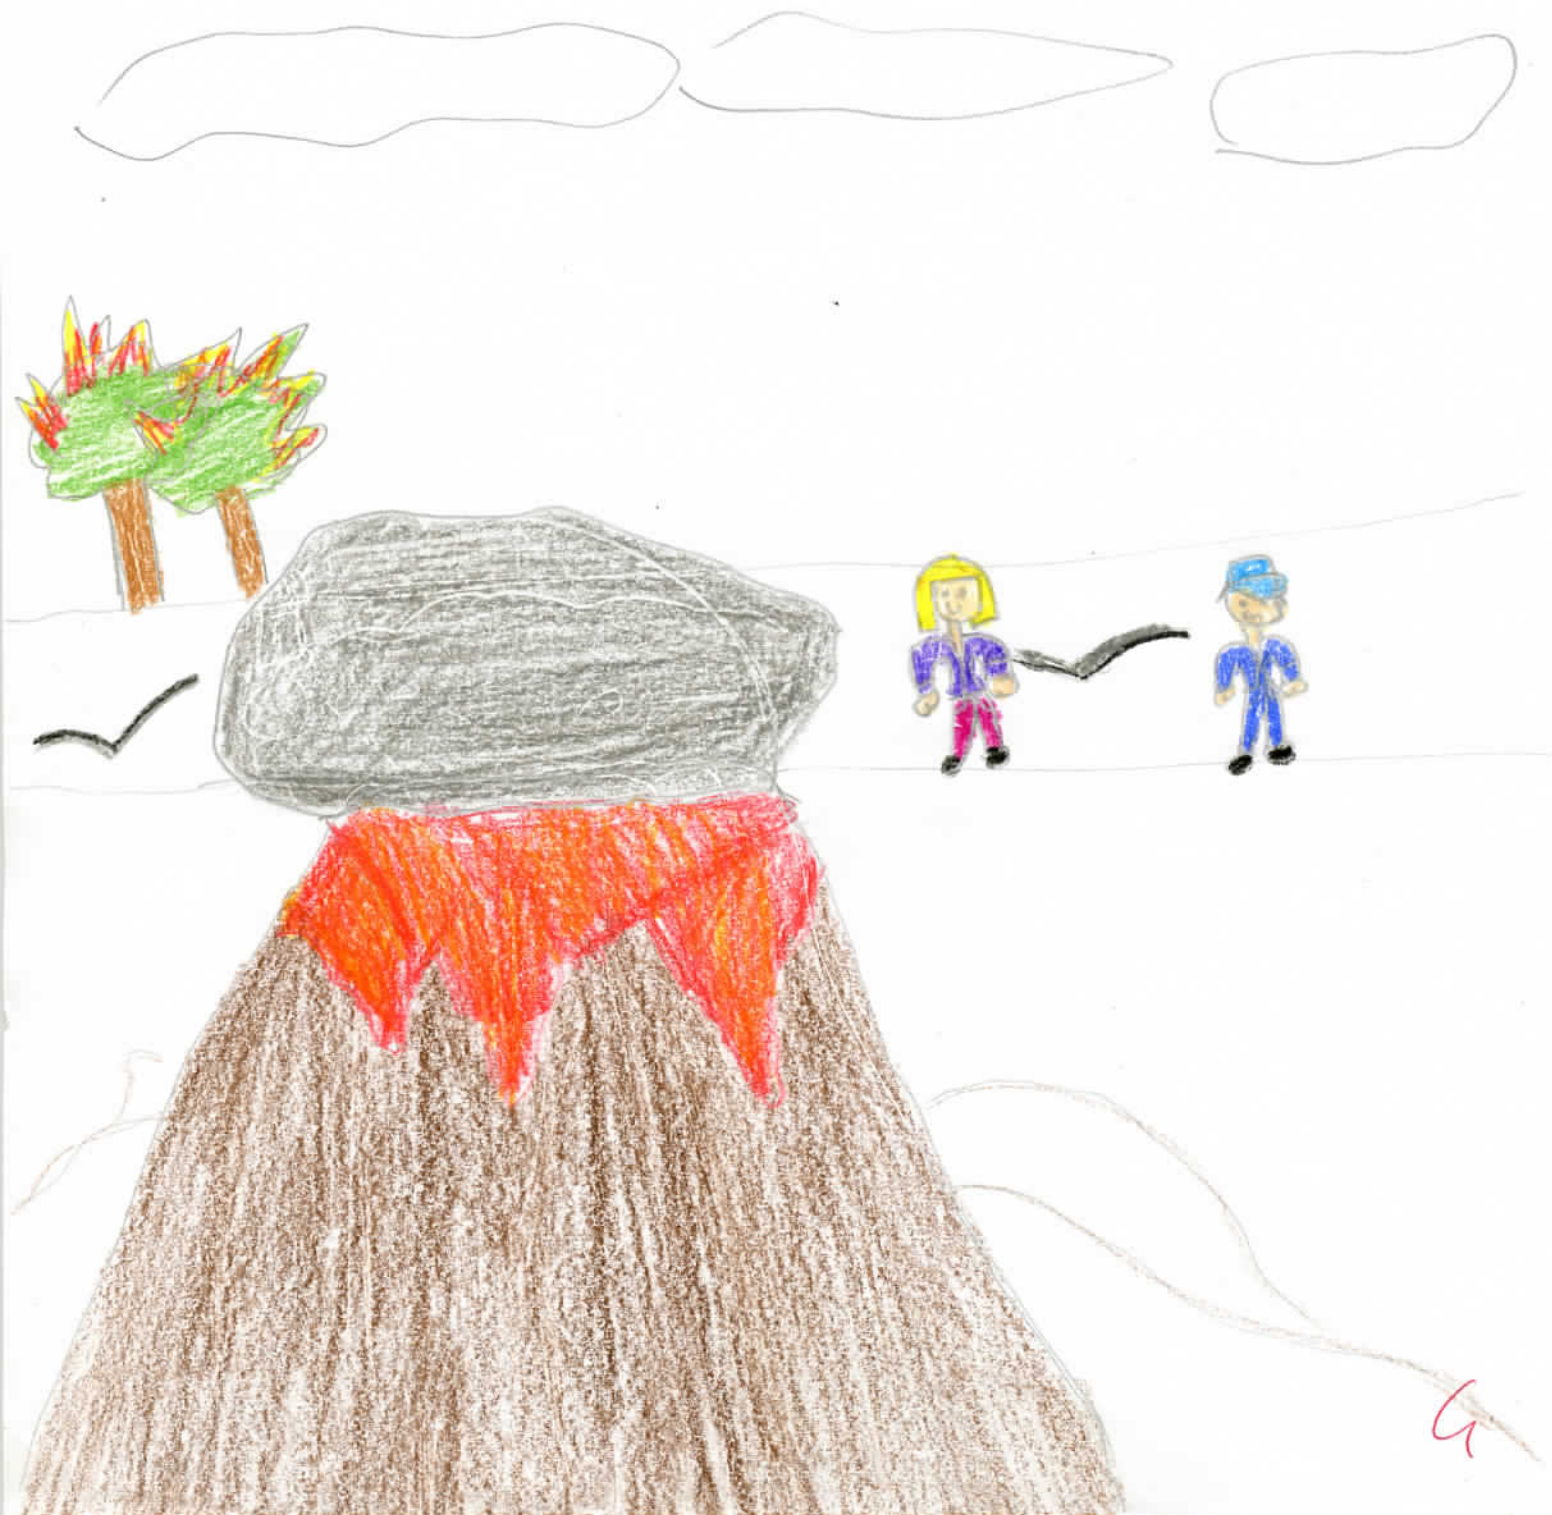

GETTATE LE PIETRE IL VULCANO INIZIA A CALMarsi, E  
GRAZIE AL PILOTA L' AEROPORTO FU SALVO. PERO' CI  
FURONO GRAVI DANNI VERSO LA NATURA, E PER FORTUNA  
I VIAGGIATORI SI SALVARONO. DA QUEL GIORNO MARTA  
DIVENNE UN APPASSIONATA DI VULCANI.



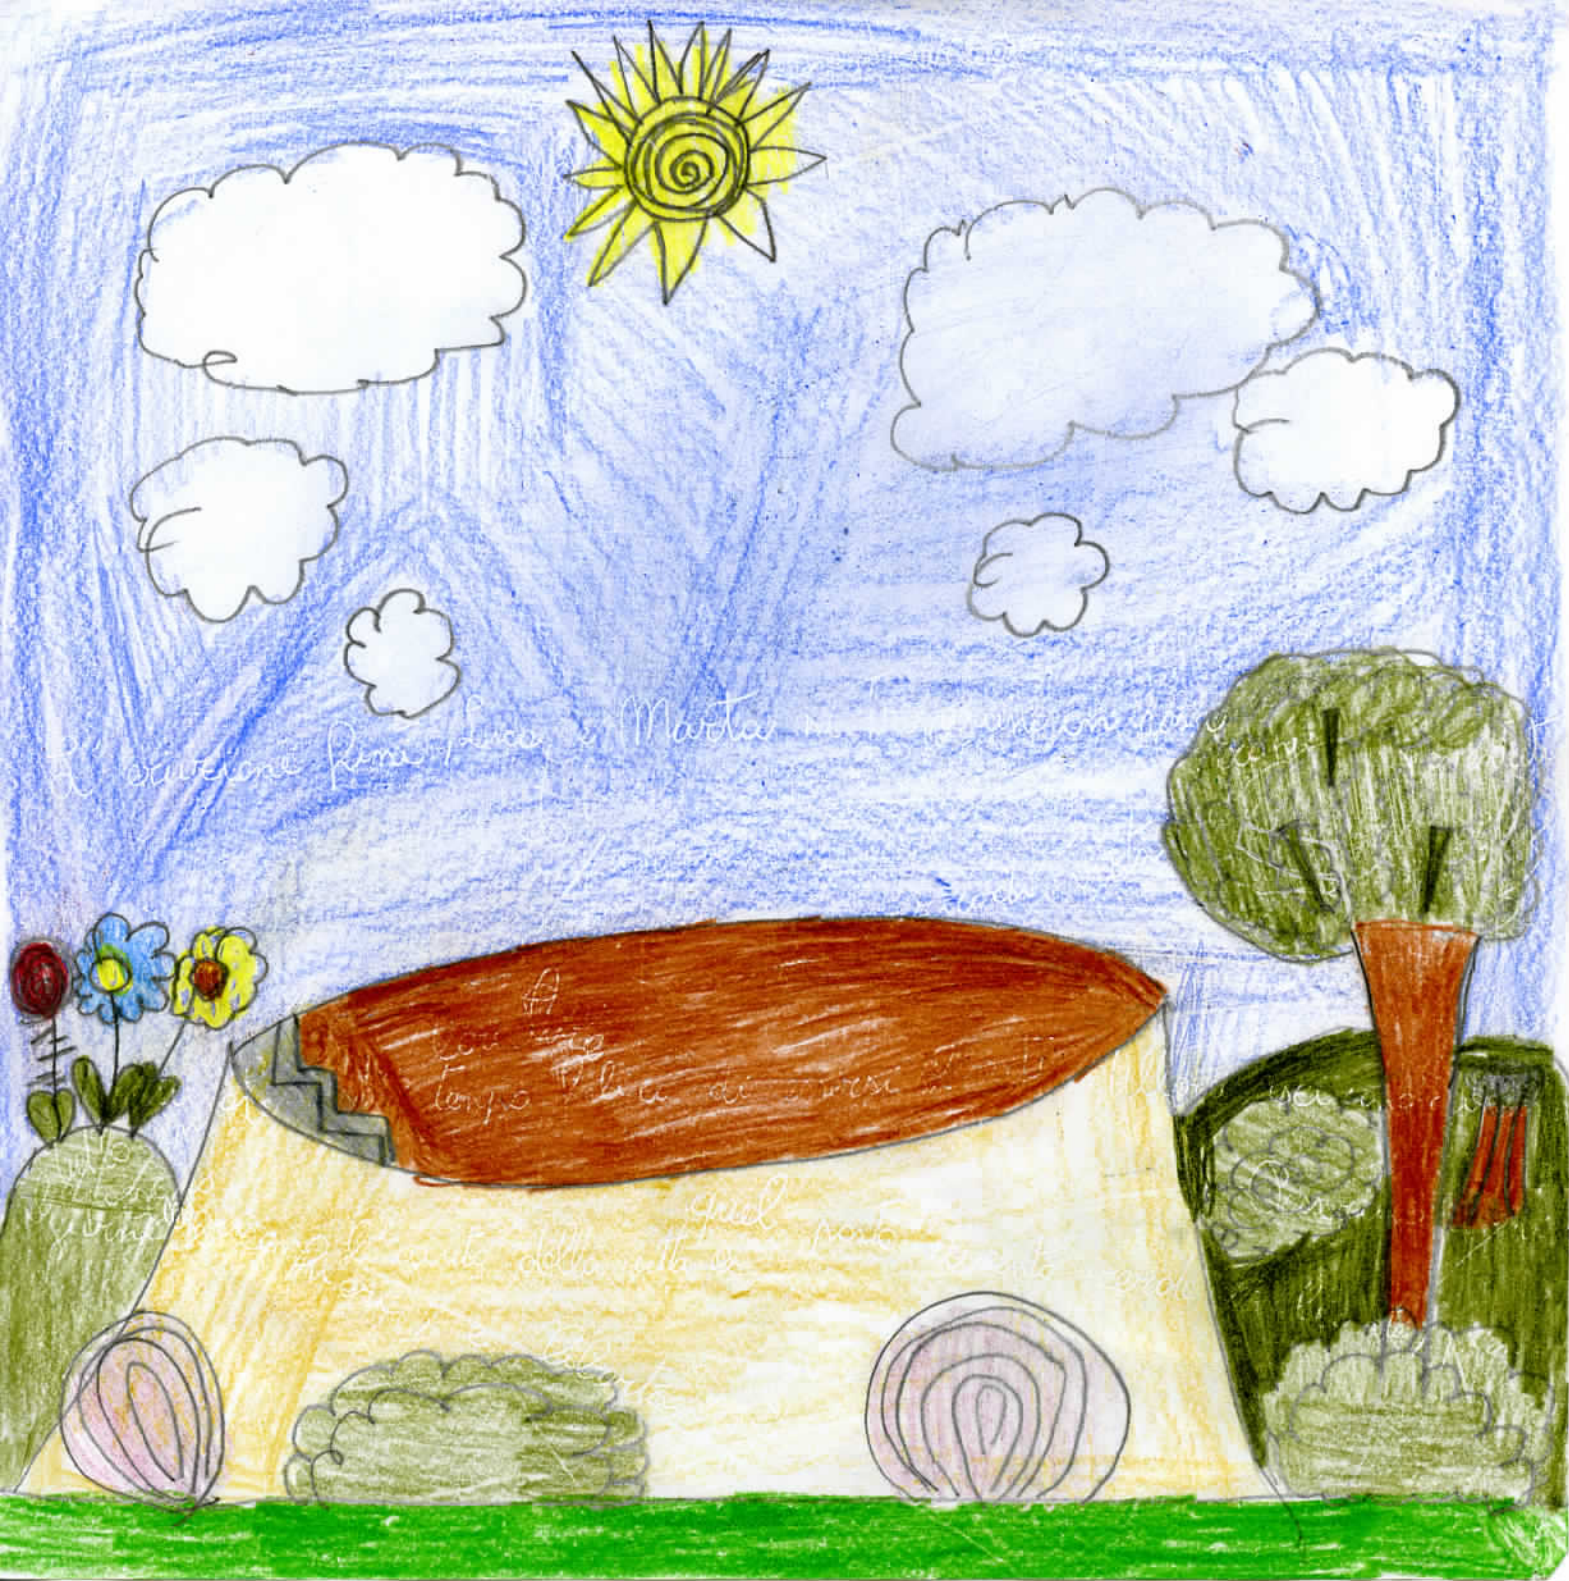

L'evacuazione finì, Luca e Marta si trovarono in casa. Erano spaventati  
 ma allo stesso tempo felici di essersi salvati. Allora uscirono di casa e  
 tutto intorno a loro era senza un pezzo di vita. Passarono anni e  
 giorni, ma con l'aiuto della città quel posto diventò verde brillante, pieno  
 di alberi, fiori, e libertà.



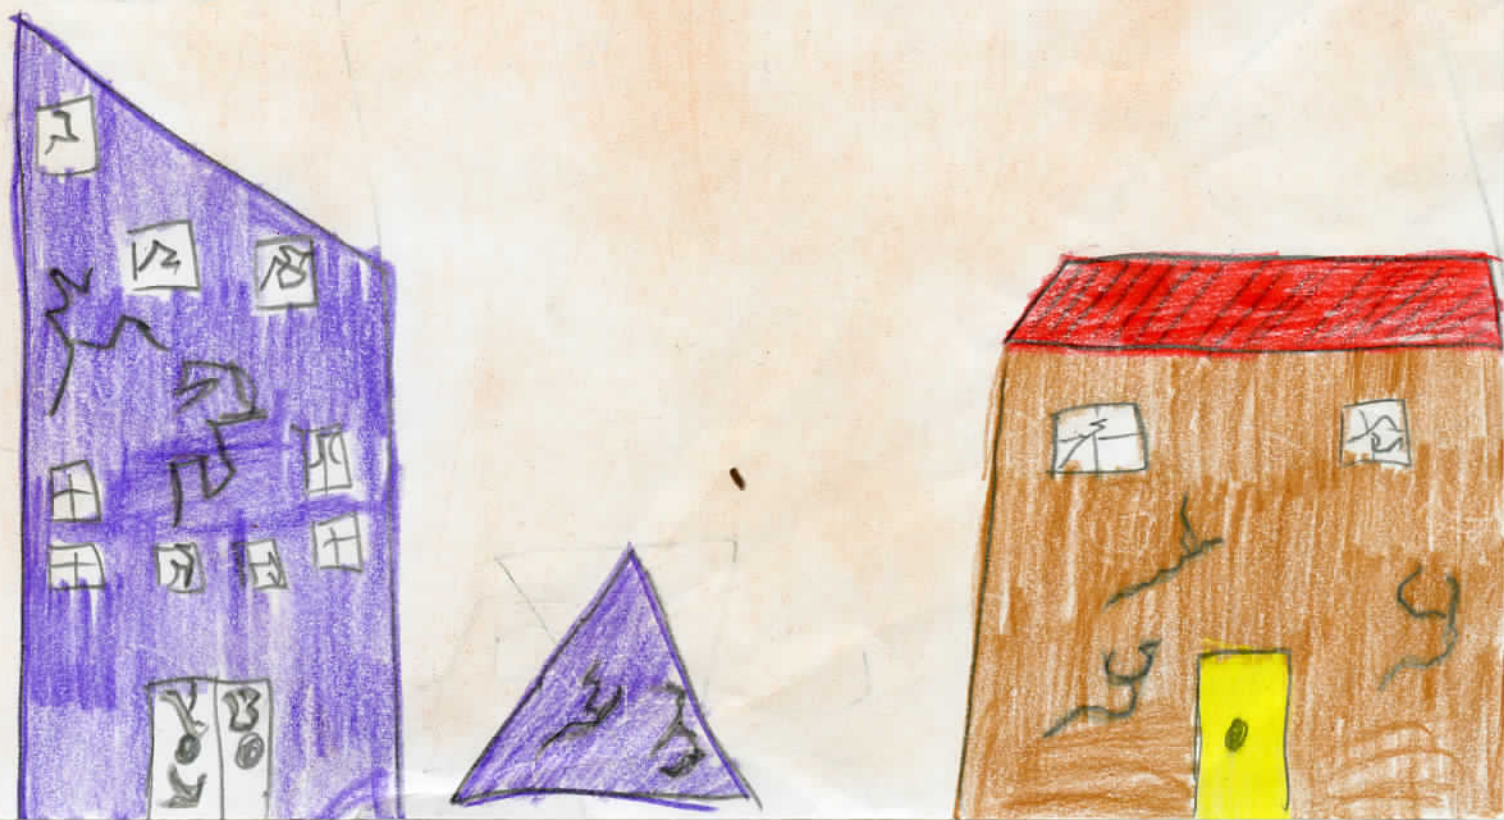

Alla fine il vulcano finì di eruttare, e si era  
distrutto tutto!!!! E allora gli scienziati non  
sapevano <sup>che cosa</sup> fare.



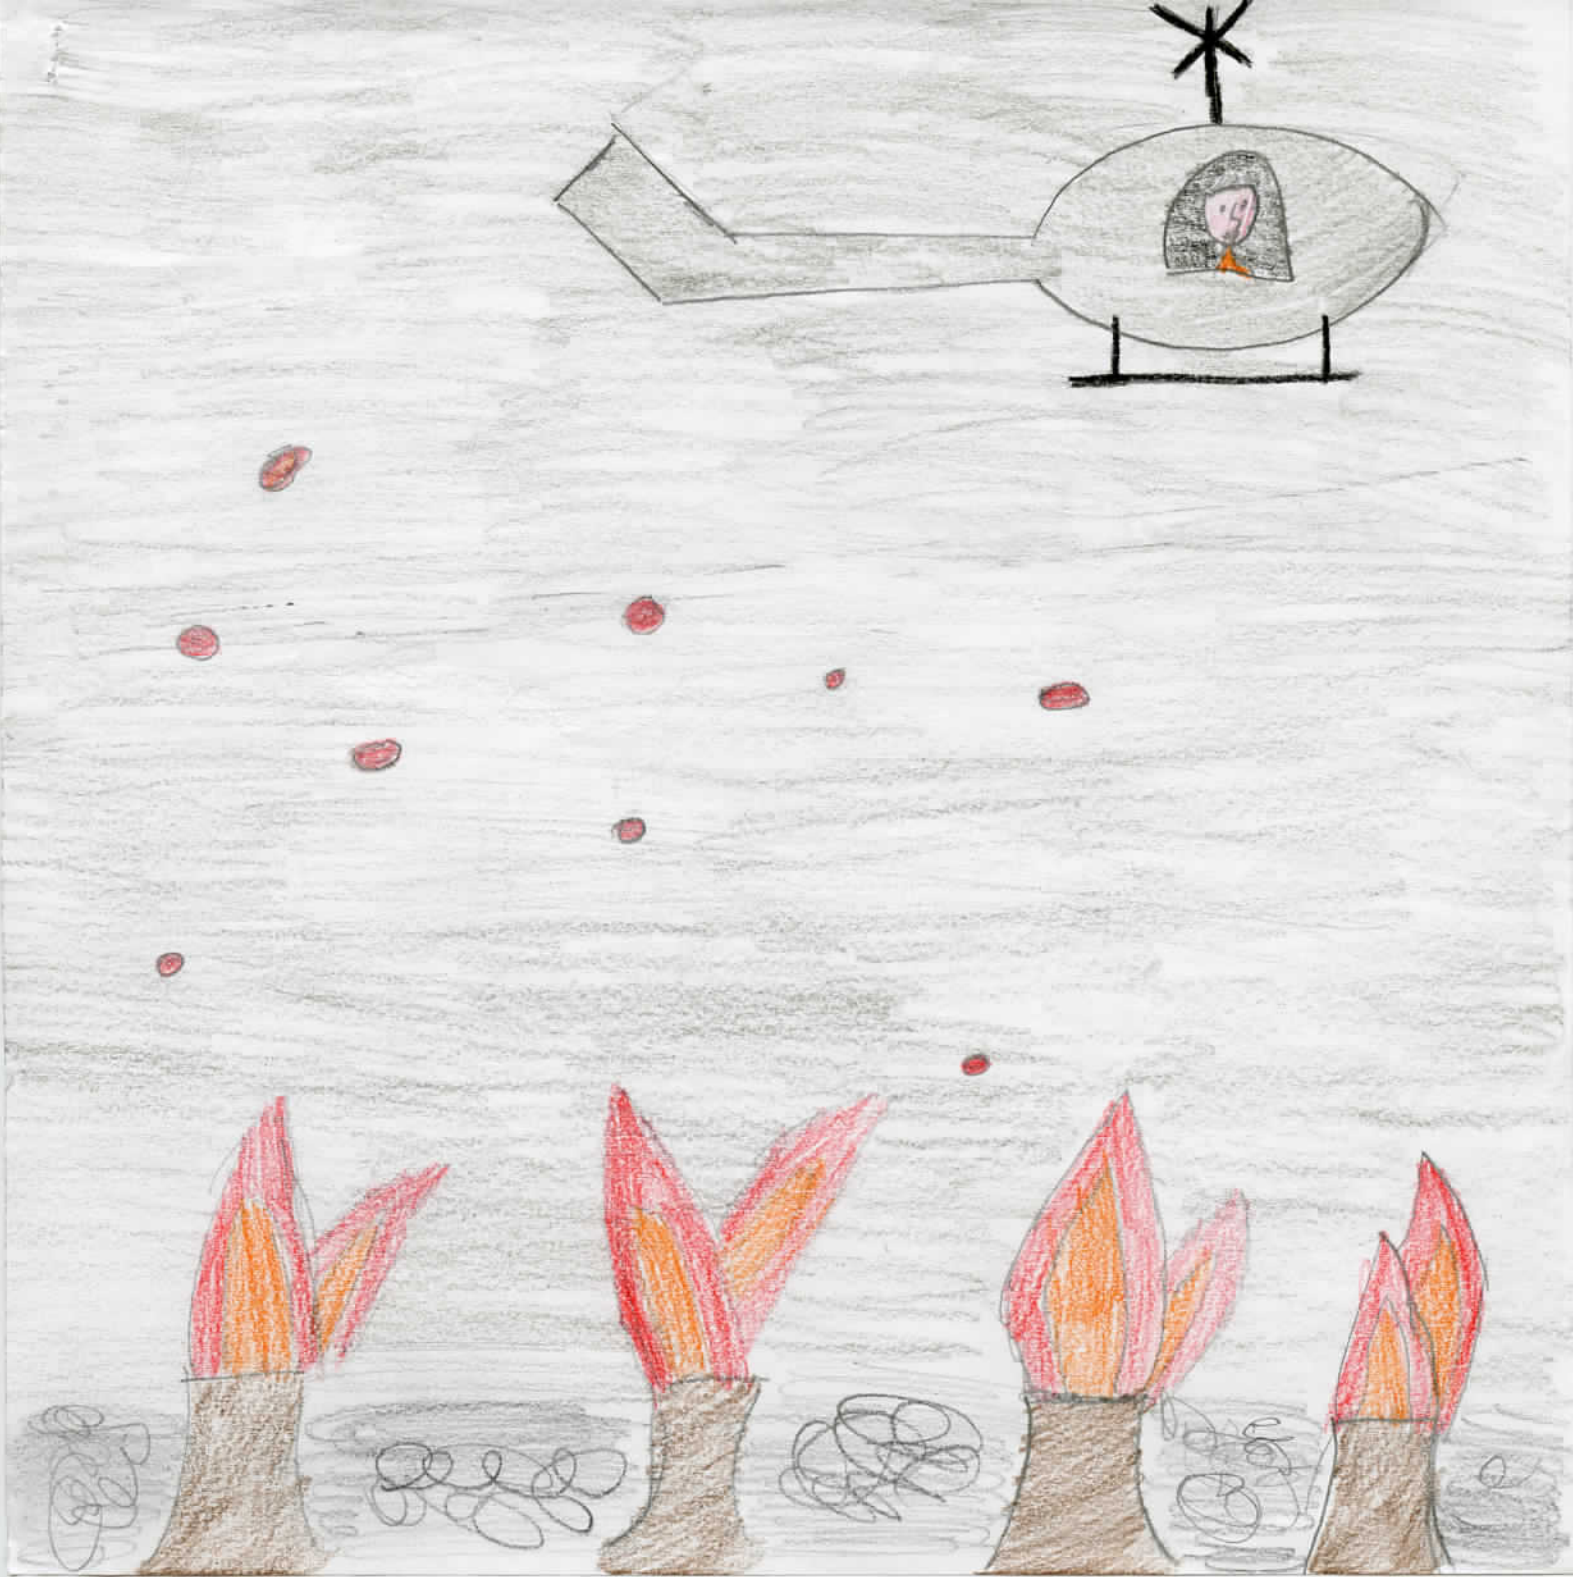

Nella scena si vede il rogo che ormai  
solvo, guarda il terreno bruciato e  
l'ambiente rovinato.



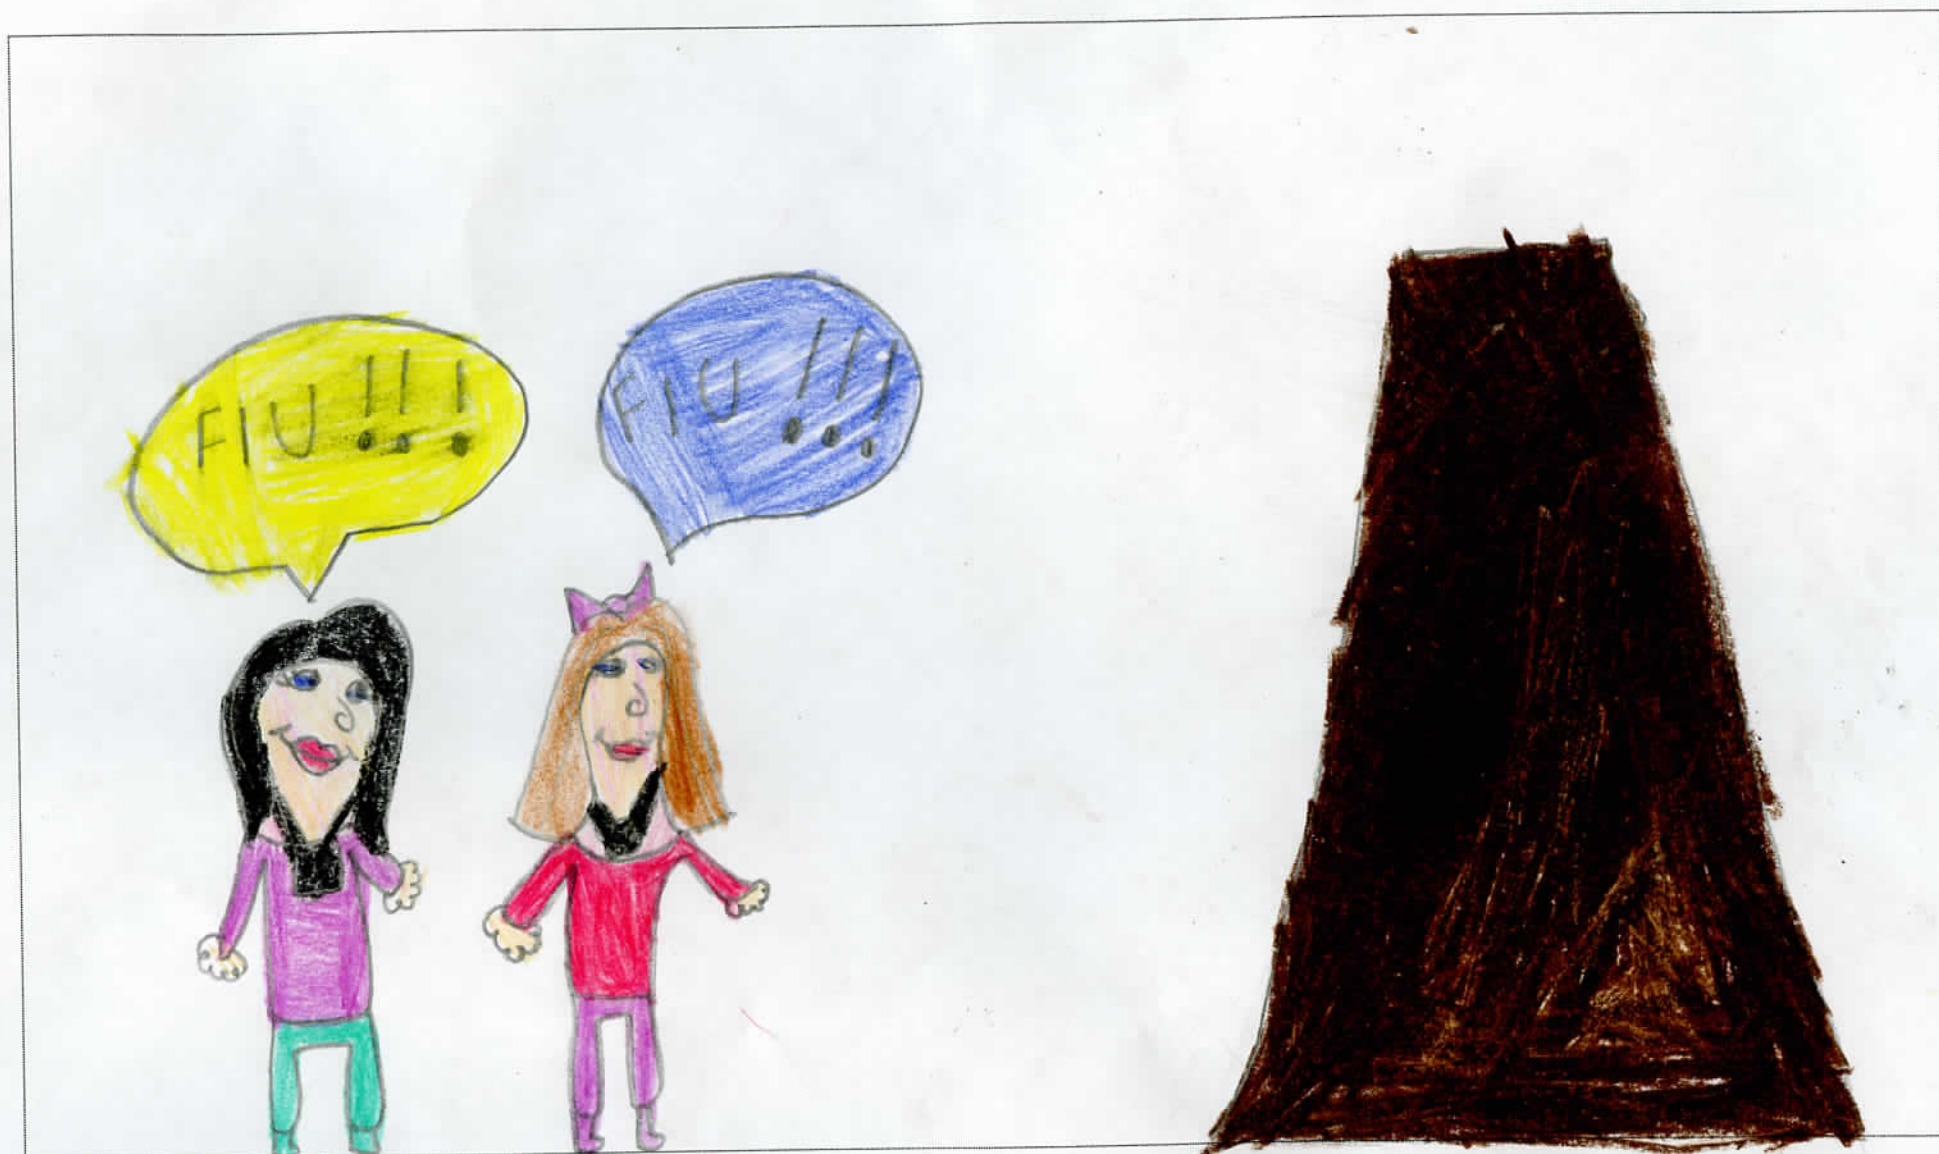

SCENA 4: Una nuova normalità -  $H^0 \perp$  LE DUE GEOLOGHE, CONTENTE DELLA SCOPERTA, FOTOGRAFANO IL VULCANO ORMAI SPENTO.



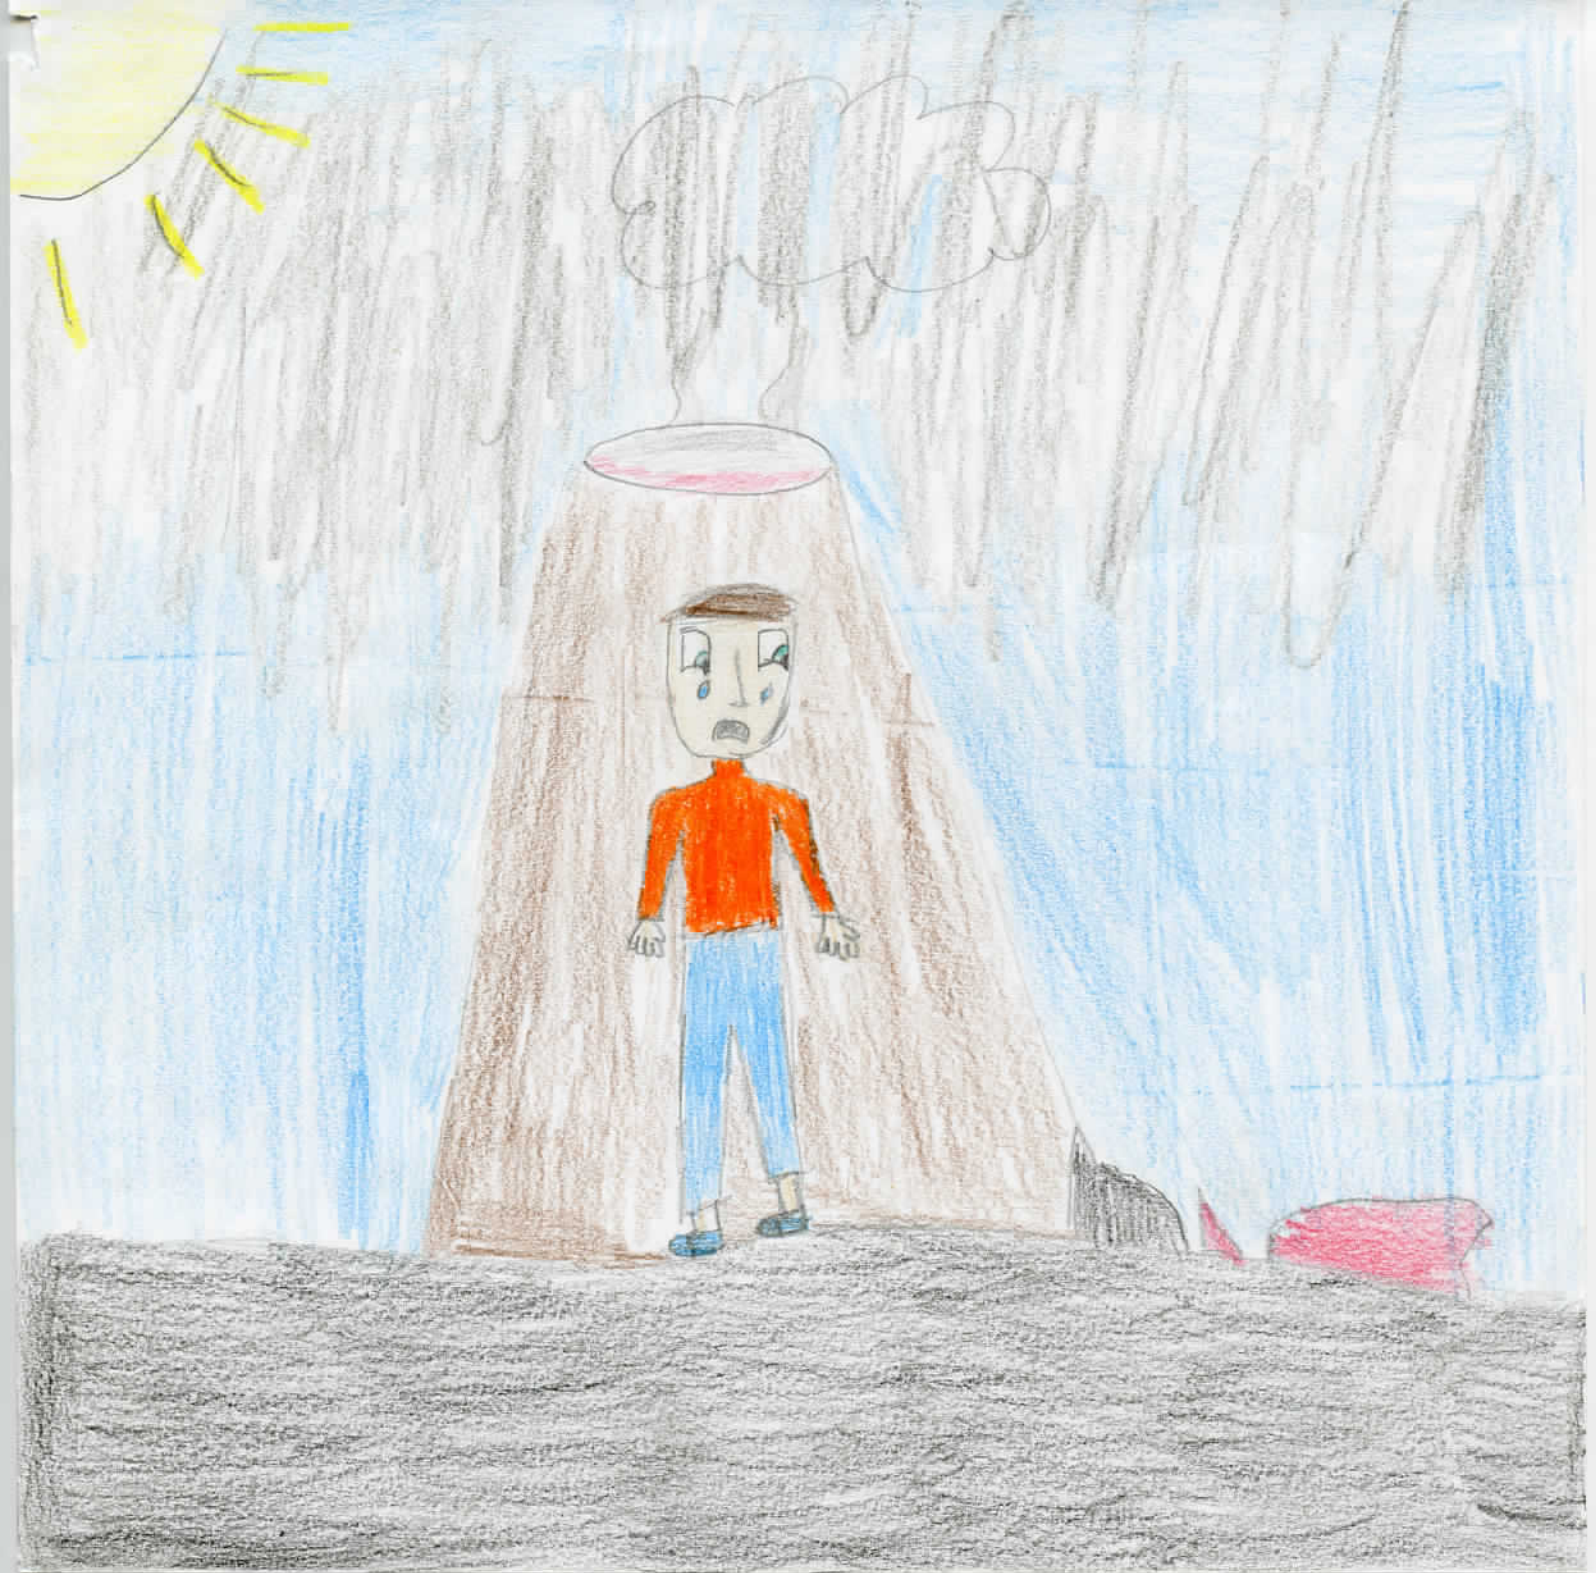

MARRY SI TROVA DI NUOVO DAVANTI A CASA SUA ED E' TRISTE PERCHE'  
LA SUA CASA E' STATA DISTRUTTA, L'AMBIENTE  
E' DISTRUTTA ALLORA LUI SI RIVOLGE A DELLE  
ASSOCIAZIONI PER NON FARE SUCCEDERE PIU' CIO' CHE  
E' SUCCESSO
